# Supplementary material for: Identification of Autophagy- and Ferroptosis-Related lncRNAs Functioned through Immune-Related Pathways in Head and Neck Squamous Carcinoma
Source: MDPI journal article supplement (doi:10.3390/life11080835), 2021-08-16
Supplement: s1 [file s1]

## Supplementary Figure

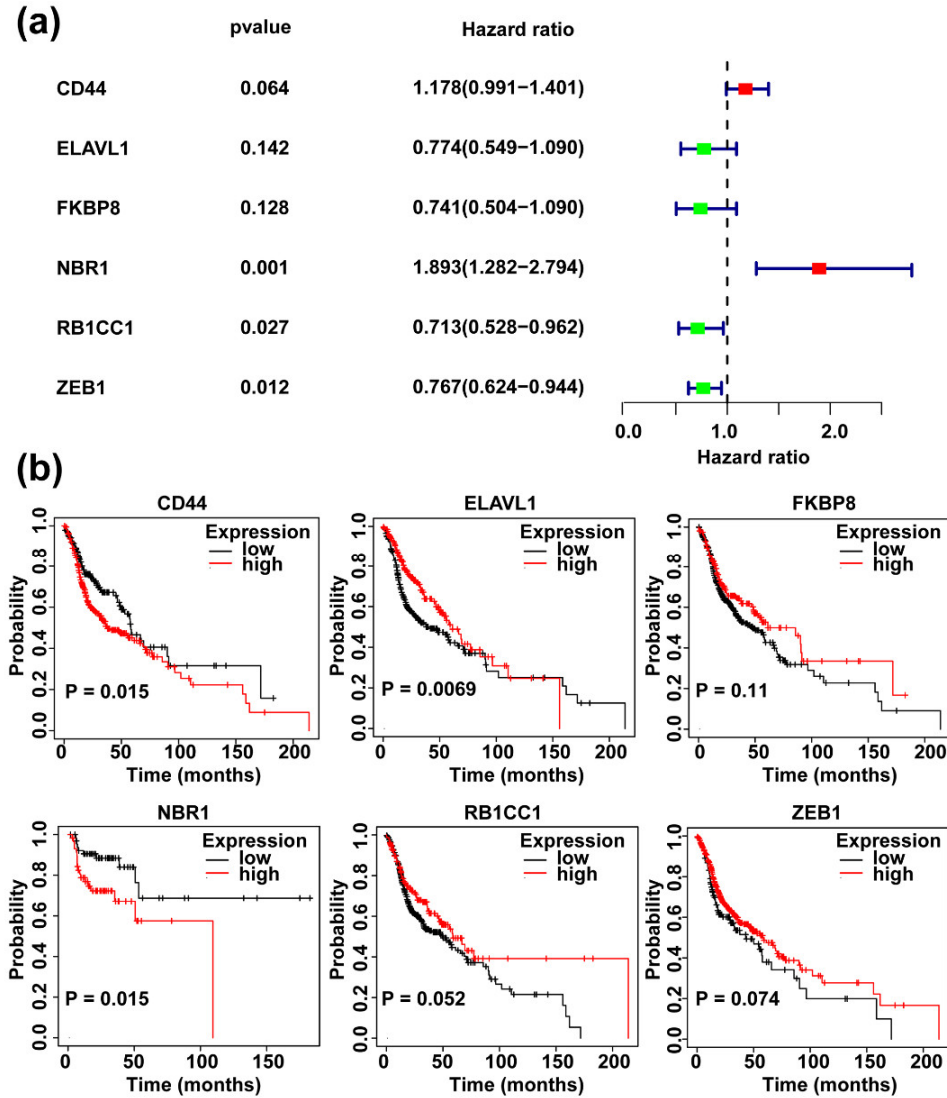

**Supplementary Figure S1.** Multivariate Cox regression analysis and KM-plot analysis for the relationship of autophagic/ferroptotic proteins and overall survival. (a). Forest diagram shows the HR (95% CI) and P-value of autophagy/ferroptosis proteins by multivariate Cox proportional hazards analysis. (b). KM-plot shows the overall survival between the high- and low-expression of autophagic/ferroptotic genes.

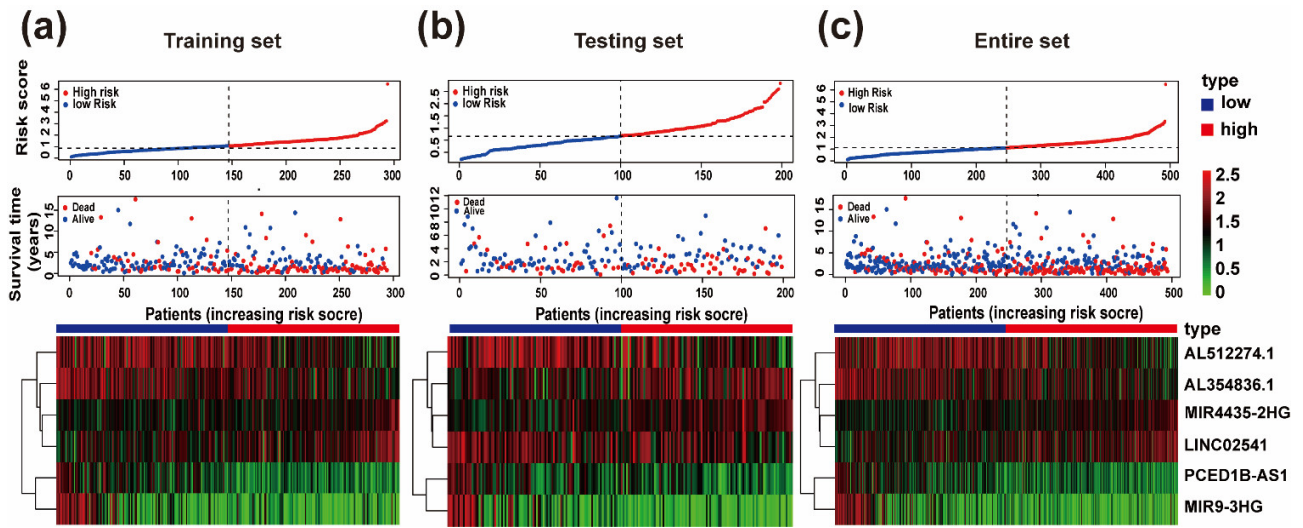

**Supplementary Figure S2.** Expression heat map, risk score distribution, and survival status of TCGA-retrieved HNSC patients. (a) The training set (n=278 tumor samples). (b) The testing set (n=183 tumor samples). (c) The entire set (n=461 tumor samples). Each group consists of three rows: top row, the risk-scores of each HNSC patients; middle row, the survival status and duration of each HNSC patients; bottom row, the expression of the 6 PAF-lncRNAs in HNSC patients. The color, from green to red shows, low to high expression.
