# Supplementary material for: Identification of Autophagy- and Ferroptosis-Related lncRNAs Functioned through Immune-Related Pathways in Head and Neck Squamous Carcinoma
Source: Life (Basel). 2021 Aug 16;11(8):835. doi: 10.3390/life11080835 (PMC8399325; doi:10.3390/life11080835)
Supplement: Supplementary file 1 [file life-11-00835-s001.zip › Supplementary Table_Qi Guo.xlsx]

## Sheet: Supplementary Table 1
Clinical characteristics of TCGA-retrieved HNSC patients in the indicated sets
Covariates	Type	Trianing set	Testing set	Entire set
Survival status	Live	153(55.04%)	105(57.38%)	258(55.97%)
	Dead	125(44.96%)	78(42.62%)	203(44.03%)
Age	<=65	181(65.11%)	120(65.57%)	301(65.29%)
	>65	97(34.89%)	63(34.43%)	160(34.71%)
Gender	Female	77(27.7%)	49(26.78%)	126(27.33%)
	Male	201(72.3%)	134(73.22%)	335(72.67%)
Stage	Stage I	14(5.04%)	5(2.73%)	19(4.12%)
	Stage II	48(17.27%)	39(21.31%)	87(18.87%)
	Stage III	61(21.94%)	39(21.31%)	100(21.69%)
	Stage IV	155(55.76%)	100(54.64%)	255(55.31%)
Grade	G1	28(10.07%)	26(14.21%)	54(11.71%)
	G2	180(64.75%)	110(60.11%)	290(62.91%)
	G3	68(24.46%)	47(25.68%)	115(24.95%)
	G4	2(0.72%)	0(0.00%)	2(0.43%)

## Sheet: Supplementary Table 2
List of autophagy and ferropotosis genes			List of AF-lncRNAs
symbol	type		AC087741.2
SLC7A11	FerrDb		PRKAG2-AS1
GPX4	FerrDb		LINC02012
AKR1C1	FerrDb		URB1-AS1
AKR1C2	FerrDb		SNHG6
AKR1C3	FerrDb		MCF2L-AS1
RB1	FerrDb		AL033384.1
HSPB1	FerrDb		LINC01615
HSF1	FerrDb		AC012442.1
GCLC	FerrDb		AC015912.3
NFE2L2	FerrDb		DGUOK-AS1
SQSTM1	FerrDb		MINCR
NQO1	FerrDb		WAC-AS1
HMOX1	FerrDb		HOXC13-AS
FTH1	FerrDb		AC007114.1
MUC1	FerrDb		AC106795.2
SLC3A2	FerrDb		AC027796.4
MT1G	FerrDb		AL109811.2
SLC40A1	FerrDb		ASB16-AS1
CISD1	FerrDb		PAXIP1-AS1
FANCD2	FerrDb		MAFG-DT
FTMT	FerrDb		CD44-AS1
HSPA5	FerrDb		AL050341.2
ATF4	FerrDb		AC135050.6
TP53	FerrDb		SOX21-AS1
HELLS	FerrDb		LINC01322
SCD	FerrDb		MHENCR
FADS2	FerrDb		AL445524.1
SRC	FerrDb		AL365203.2
STAT3	FerrDb		ILF3-DT
PML	FerrDb		AC026740.1
MTOR	FerrDb		AL035258.1
NFS1	FerrDb		LINC02195
TP63	FerrDb		AC104794.3
CDKN1A	FerrDb		AC091230.1
MIR137	FerrDb		AP001505.1
ENPP2	FerrDb		MELTF-AS1
VDAC2	FerrDb		AC008443.5
FH	FerrDb		AC022144.1
CISD2	FerrDb		AL023284.4
MIR9-1	FerrDb		CD27-AS1
MIR9-2	FerrDb		AL161431.1
MIR9-3	FerrDb		SNHG17
CBS	FerrDb		BX470102.1
ISCU	FerrDb		RAB11B-AS1
ACSL3	FerrDb		AC091563.1
OTUB1	FerrDb		AC124798.1
CD44	FerrDb		AC010531.6
LINC00336	FerrDb		ZSCAN16-AS1
BRD4	FerrDb		AC114956.1
PRDX6	FerrDb		AP006621.3
MIR17	FerrDb		DLGAP1-AS1
SESN2	FerrDb		AC007996.1
NF2	FerrDb		AC090425.2
ARNTL	FerrDb		TMPO-AS1
HIF1A	FerrDb		AC108673.3
JUN	FerrDb		AC110995.1
CA9	FerrDb		LINC00339
TMBIM4	FerrDb		GAS5
PLIN2	FerrDb		HCP5
MIR212	FerrDb		MIR4435-2HG
Fer1HCH	FerrDb		NCK1-DT
AIFM2	FerrDb		SNHG8
LAMP2	FerrDb		THAP9-AS1
ZFP36	FerrDb		MSC-AS1
PROM2	FerrDb		AC009237.14
CHMP5	FerrDb		PCED1B-AS1
CHMP6	FerrDb		AL135818.2
CAV1	FerrDb		AC005288.1
GCH1	FerrDb		AC100810.1
RPL8	FerrDb		AC005332.6
IREB2	FerrDb		LINC00885
ATP5MC3	FerrDb		AP000251.1
CS	FerrDb		LINC01023
EMC2	FerrDb		AC108449.2
ACSF2	FerrDb		BAIAP2-DT
NOX1	FerrDb		AC093673.1
CYBB	FerrDb		NORAD
NOX3	FerrDb		ARRDC1-AS1
NOX4	FerrDb		NRSN2-AS1
NOX5	FerrDb		AC012510.1
DUOX1	FerrDb		AC004148.1
DUOX2	FerrDb		SNHG7
G6PD	FerrDb		LINC01003
PGD	FerrDb		AC080013.6
VDAC2	FerrDb		NUP50-DT
PIK3CA	FerrDb		HOTAIRM1
FLT3	FerrDb		AC024075.1
SCP2	FerrDb		AC010761.1
TP53	FerrDb		LINC00941
ACSL4	FerrDb		AL355488.1
LPCAT3	FerrDb		AC133552.5
NRAS	FerrDb		AC091182.2
KRAS	FerrDb		PTOV1-AS2
HRAS	FerrDb		LNCTAM34A
TF	FerrDb		CRNDE
TFRC	FerrDb		LINC01089
TFR2	FerrDb		LINC00519
SLC38A1	FerrDb		AC026471.4
SLC1A5	FerrDb		AL355001.2
GLS2	FerrDb		FGD5-AS1
GOT1	FerrDb		AC009005.1
CARS1	FerrDb		AC008735.2
ALOX5	FerrDb		OLMALINC
KEAP1	FerrDb		AC005392.2
HMOX1	FerrDb		IPO5P1
ATG5	FerrDb		SNHG4
ATG7	FerrDb		AC012640.4
NCOA4	FerrDb		SNHG25
ALOX12	FerrDb		ANKRD10-IT1
ALOX12B	FerrDb		ASMTL-AS1
ALOX15	FerrDb		AC016888.1
ALOX15B	FerrDb		AC125807.2
ALOXE3	FerrDb		PTCSC2
PHKG2	FerrDb		AC103691.1
ACO1	FerrDb		TNRC6C-AS1
G6PDX	FerrDb		AL512274.1
ULK1	FerrDb		LINC01770
ATG3	FerrDb		DHRS4-AS1
ATG4D	FerrDb		AC128709.2
BECN1	FerrDb		MYOSLID
MAP1LC3A	FerrDb		PIK3CD-AS2
GABARAPL2	FerrDb		LINC02035
GABARAPL1	FerrDb		AC024896.1
ATG16L1	FerrDb		LINC01752
WIPI1	FerrDb		EBLN3P
WIPI2	FerrDb		AC004918.1
SNX4	FerrDb		AC099568.2
ATG13	FerrDb		AL031058.1
ULK2	FerrDb		AC116366.1
SAT1	FerrDb		SERTAD4-AS1
EGFR	FerrDb		NNT-AS1
MAPK3	FerrDb		MIR200CHG
MAPK1	FerrDb		AC012065.3
BID	FerrDb		AP002761.4
ZEB1	FerrDb		MIR210HG
DPP4	FerrDb		AC010735.2
CDKN2A	FerrDb		PARD3-AS1
PEBP1	FerrDb		SNHG11
SOCS1	FerrDb		AC092718.4
CDO1	FerrDb		LINC00667
MYB	FerrDb		AC073046.1
MAPK8	FerrDb		AP003352.1
MAPK9	FerrDb		AC073896.4
CHAC1	FerrDb		LINP1
MAPK14	FerrDb		MIR31HG
LINC00472	FerrDb		AL139287.1
PRKAA2	FerrDb		SMIM25
PRKAA1	FerrDb		ZNF667-AS1
ELAVL1	FerrDb		SLC12A9-AS1
BAP1	FerrDb		AC012615.1
ABCC1	FerrDb		AC002398.1
MIR6852	FerrDb		LINC01871
ACVR1B	FerrDb		AC025181.2
TGFBR1	FerrDb		SNHG3
EPAS1	FerrDb		TRIM52-AS1
HILPDA	FerrDb		LINC00963
HIF1A	FerrDb		AC005261.2
IFNG	FerrDb		AC027644.3
ANO6	FerrDb		DLG5-AS1
LPIN1	FerrDb		AC019080.1
HMGB1	FerrDb		HS1BP3-IT1
TNFAIP3	FerrDb		TP53TG1
TLR4	FerrDb		AL451165.2
ATF3	FerrDb		AC147067.1
ATM	FerrDb		AC008556.1
YY1AP1	FerrDb		AL450998.2
EGLN2	FerrDb		PVT1
MIOX	FerrDb		LMO7-AS1
TAZ	FerrDb		EPB41L4A-AS1
MTDH	FerrDb		AL139385.1
IDH1	FerrDb		SNHG12
SIRT1	FerrDb		AC136475.3
FBXW7	FerrDb		ATP1B3-AS1
PANX1	FerrDb		LINC01564
DNAJB6	FerrDb		AC131009.3
BACH1	FerrDb		AC010168.1
LONP1	FerrDb		AC099066.2
ACSL4	literature		MIR155HG
AKR1C1	literature		SNHG19
AKR1C2	literature		AC132872.1
AKR1C3	literature		SNHG10
ALOX15	literature		LINC02541
ALOX5	literature		MIAT
ALOX12	literature		AC245041.1
ATP5MC3	literature		RNASEH1-AS1
CARS	literature		MIR222HG
CBS	literature		AC012236.1
CD44	literature		AC008736.1
CHAC1	literature		AC007342.4
CISD1	literature		AC002401.4
CS	literature		AC026401.3
DPP4	literature		LINC01637
FANCD2	literature		AL354766.2
GCLC	literature		AC112491.1
GCLM	literature		AC083799.1
GLS2	literature		AC027031.2
GPX4	literature		LINC00342
GSS	literature		LINC01589
HMGCR	literature		AC015922.3
HSPB1	literature		AC022509.3
CRYAB	literature		AL022328.2
LPCAT3	literature		LINC00847
MT1G	literature		NOP14-AS1
NCOA4	literature		AC007098.1
PTGS2	literature		AC040160.1
RPL8	literature		TGFB2-AS1
SAT1	literature		AC015922.2
SLC7A11	literature		LINC01006
FDFT1	literature		AC011479.2
TFRC	literature		LINC02562
TP53	literature		MAPKAPK5-AS1
EMC2	literature		MIR193BHG
AIFM2	literature		C5orf66-AS1
PHKG2	literature		AC004687.1
HSBP1	literature		ATP2A1-AS1
ACO1	literature		AL591895.1
FTH1	literature		AC016876.2
STEAP3	literature		LINC02446
NFS1	literature		BX293535.1
ACSL3	literature		AC106900.1
ACACA	literature		DLGAP1-AS2
PEBP1	literature		ZNF710-AS1
ZEB1	literature		NEAT1
SQLE	literature		AL390728.6
FADS2	literature		USP30-AS1
NFE2L2	literature		FOXN3-AS1
KEAP1	literature		AC036176.3
NQO1	literature		LINC02560
NOX1	literature		AC002470.1
ABCC1	literature		AC115618.2
SLC1A5	literature		NKILA
GOT1	literature		AC008011.2
G6PD	literature		AC092171.2
PGD	literature		AL121832.2
IREB2	literature		HCG11
HMOX1	literature		AC067838.1
ACSF2	literature		LINC01527
ABL1	Autophagy Database & HAMdb		SERPINB9P1
ABL2	Autophagy Database & HAMdb		LINC00707
ACBD5	Autophagy Database & HAMdb		AL590666.2
AGFG1	Autophagy Database & HAMdb		LINC02323
AKT1	Autophagy Database & HAMdb		CHKB-DT
AKT1S1	Autophagy Database & HAMdb		AC007991.2
AKT2	Autophagy Database & HAMdb		PLBD1-AS1
AKT3	Autophagy Database & HAMdb		U62317.2
ALPI	Autophagy Database & HAMdb		AL049555.1
ALPL	Autophagy Database & HAMdb		APTR
AMBRA1	Autophagy Database & HAMdb		AC104031.1
AP1AR	Autophagy Database & HAMdb		AC120053.1
AP1B1	Autophagy Database & HAMdb		AC083841.1
AP1G1	Autophagy Database & HAMdb		AL354836.1
AP1G2	Autophagy Database & HAMdb		AC009283.1
AP1M1	Autophagy Database & HAMdb		AL355472.1
AP1M2	Autophagy Database & HAMdb		VPS9D1-AS1
AP1S1	Autophagy Database & HAMdb		AC006206.2
AP1S2	Autophagy Database & HAMdb		FOXD3-AS1
AP1S3	Autophagy Database & HAMdb		LINC02178
AP2A1	Autophagy Database & HAMdb		AP002360.2
AP2A2	Autophagy Database & HAMdb		AC011445.2
AP2B1	Autophagy Database & HAMdb		AC018695.6
AP2M1	Autophagy Database & HAMdb		AC096677.1
AP2S1	Autophagy Database & HAMdb		AC005083.1
APAF1	Autophagy Database & HAMdb		UNC5B-AS1
ARF6	Autophagy Database & HAMdb		AC048341.2
ARHGAP26	Autophagy Database & HAMdb		U62317.4
ARL2	Autophagy Database & HAMdb		TMEM44-AS1
ARNT	Autophagy Database & HAMdb		LINC01614
ATF4	Autophagy Database & HAMdb		PCAT6
ATG10	Autophagy Database & HAMdb		AC027307.2
ATG101	Autophagy Database & HAMdb		AL118516.1
ATG12	Autophagy Database & HAMdb		AL035071.1
ATG13	Autophagy Database & HAMdb		SH3PXD2A-AS1
ATG14	Autophagy Database & HAMdb		SNHG15
ATG16L1	Autophagy Database & HAMdb		AC104083.1
ATG16L2	Autophagy Database & HAMdb		AL392172.1
ATG2A	Autophagy Database & HAMdb		LINC02454
ATG2B	Autophagy Database & HAMdb		PRR34-AS1
ATG3	Autophagy Database & HAMdb		CYTOR
ATG4A	Autophagy Database & HAMdb		AC084036.1
ATG4B	Autophagy Database & HAMdb		MIR100HG
ATG4C	Autophagy Database & HAMdb		YTHDF3-AS1
ATG4D	Autophagy Database & HAMdb		AC115522.1
ATG5	Autophagy Database & HAMdb		SNHG1
ATG7	Autophagy Database & HAMdb		AL359091.4
ATG9	Autophagy Database & HAMdb		AL359513.1
ATG9A	Autophagy Database & HAMdb		DANCR
ATG9B	Autophagy Database & HAMdb		LINC01578
ATM	Autophagy Database & HAMdb		AC092171.5
AURKA	Autophagy Database & HAMdb		AC254633.1
BAG1	Autophagy Database & HAMdb		DCST1-AS1
BAG3	Autophagy Database & HAMdb		AC124067.2
BCL2	Autophagy Database & HAMdb		AC024075.2
BCL2L1	Autophagy Database & HAMdb		LINC01315
BCR	Autophagy Database & HAMdb		LINC01137
BDNF	Autophagy Database & HAMdb		AC105942.1
BECN1	Autophagy Database & HAMdb		AC004839.1
BECN2	Autophagy Database & HAMdb		AL161785.1
BNIP3	Autophagy Database & HAMdb		AL355312.4
CALCOCO2	Autophagy Database & HAMdb		LINC01703
CAMK1	Autophagy Database & HAMdb		AC084018.1
CAMKK2	Autophagy Database & HAMdb		AC099518.6
CAPN1	Autophagy Database & HAMdb		AL132712.1
CAPN10	Autophagy Database & HAMdb		AL354892.2
CAPN11	Autophagy Database & HAMdb		AC008764.2
CAPN12	Autophagy Database & HAMdb		AC019080.4
CAPN13	Autophagy Database & HAMdb		AC064836.3
CAPN14	Autophagy Database & HAMdb		LINC01679
CAPN2	Autophagy Database & HAMdb		HLA-DQB1-AS1
CAPN3	Autophagy Database & HAMdb		AC138696.2
CAPN5	Autophagy Database & HAMdb		LINC00460
CAPN6	Autophagy Database & HAMdb		AL033397.1
CAPN7	Autophagy Database & HAMdb		AC046143.2
CAPN8	Autophagy Database & HAMdb		SFTA1P
CAPN9	Autophagy Database & HAMdb		AATBC
CAPNS1	Autophagy Database & HAMdb		AC020907.1
CAPNS2	Autophagy Database & HAMdb		AC026979.2
CASP3	Autophagy Database & HAMdb		SNHG9
CDKN1B	Autophagy Database & HAMdb		AC091729.3
CDKN2A	Autophagy Database & HAMdb		ITGB2-AS1
CHUK	Autophagy Database & HAMdb		LINC01133
CLTA	Autophagy Database & HAMdb		FGF14-AS2
CLTB	Autophagy Database & HAMdb		ZFAS1
CLTC	Autophagy Database & HAMdb		LINC01214
CSNK2A1	Autophagy Database & HAMdb		PITPNA-AS1
CSNK2B	Autophagy Database & HAMdb		AC040169.1
CTSB	Autophagy Database & HAMdb		AL035661.1
CTSD	Autophagy Database & HAMdb		AC005696.1
CTSL	Autophagy Database & HAMdb		OSER1-DT
CTSV	Autophagy Database & HAMdb		LINC01176
DAPK1	Autophagy Database & HAMdb		OIP5-AS1
DAPK2	Autophagy Database & HAMdb		AC103591.3
DAPK3	Autophagy Database & HAMdb		MIR9-3HG
DDIT4	Autophagy Database & HAMdb		AL035413.1
DEPTOR	Autophagy Database & HAMdb		KMT2E-AS1
DIRAS3	Autophagy Database & HAMdb		SPINT1-AS1
DNM1	Autophagy Database & HAMdb		KCNMB2-AS1
DNM1L	Autophagy Database & HAMdb		AL139289.1
DNM2	Autophagy Database & HAMdb		LOXL1-AS1
DNM3	Autophagy Database & HAMdb		LINC01116
DRAM2	Autophagy Database & HAMdb		LINC01605
E2F1	Autophagy Database & HAMdb		AL359921.2
EEF1A1	Autophagy Database & HAMdb		PSMB8-AS1
EGFR	Autophagy Database & HAMdb		ELF3-AS1
EI24	Autophagy Database & HAMdb		MIR3945HG
EIF2AK1	Autophagy Database & HAMdb		SNHG5
EIF2AK2	Autophagy Database & HAMdb		AL021707.6
EIF2AK3	Autophagy Database & HAMdb		AL390719.2
EIF2AK4	Autophagy Database & HAMdb		AC055822.1
EIF2S1	Autophagy Database & HAMdb		FAM83A-AS1
EIF4E	Autophagy Database & HAMdb		AC020916.1
EIF4EBP1	Autophagy Database & HAMdb		MIR205HG
EIF4EBP2	Autophagy Database & HAMdb		LINC01269
EIF4EBP3	Autophagy Database & HAMdb		AC004816.1
EPG5	Autophagy Database & HAMdb		AL391121.1
EPHB2	Autophagy Database & HAMdb		AC008610.1
ERBB2	Autophagy Database & HAMdb		AC129492.1
ERN1	Autophagy Database & HAMdb		DSG1-AS1
ERN2	Autophagy Database & HAMdb		AC134312.5
EVA1A	Autophagy Database & HAMdb		WNT5A-AS1
EXOC1	Autophagy Database & HAMdb		AP000759.1
EXOC2	Autophagy Database & HAMdb		AC005332.3
EXOC3	Autophagy Database & HAMdb		AF131215.5
EXOC4	Autophagy Database & HAMdb
EXOC5	Autophagy Database & HAMdb
EXOC6	Autophagy Database & HAMdb
EXOC7	Autophagy Database & HAMdb
EXOC8	Autophagy Database & HAMdb
FIS1	Autophagy Database & HAMdb
FKBP1A	Autophagy Database & HAMdb
FKBP8	Autophagy Database & HAMdb
FOS	Autophagy Database & HAMdb
FOXO1	Autophagy Database & HAMdb
FOXO3	Autophagy Database & HAMdb
FUNDC1	Autophagy Database & HAMdb
GABARAP	Autophagy Database & HAMdb
GABARAPL1	Autophagy Database & HAMdb
GABARAPL2	Autophagy Database & HAMdb
GAPDH	Autophagy Database & HAMdb
GFAP	Autophagy Database & HAMdb
GLIPR2	Autophagy Database & HAMdb
GOPC	Autophagy Database & HAMdb
GRB2	Autophagy Database & HAMdb
HARBI1	Autophagy Database & HAMdb
HDAC1	Autophagy Database & HAMdb
HDAC10	Autophagy Database & HAMdb
HDAC2	Autophagy Database & HAMdb
HDAC6	Autophagy Database & HAMdb
HIF1A	Autophagy Database & HAMdb
HRAS	Autophagy Database & HAMdb
HSPA5	Autophagy Database & HAMdb
HSPA8	Autophagy Database & HAMdb
IGF1R	Autophagy Database & HAMdb
IKBKB	Autophagy Database & HAMdb
IKBKE	Autophagy Database & HAMdb
INS	Autophagy Database & HAMdb
INSR	Autophagy Database & HAMdb
IRGM	Autophagy Database & HAMdb
Irgm1	Autophagy Database & HAMdb
IRS1	Autophagy Database & HAMdb
IRS2	Autophagy Database & HAMdb
IRS4	Autophagy Database & HAMdb
ITPR1	Autophagy Database & HAMdb
ITPR2	Autophagy Database & HAMdb
ITPR3	Autophagy Database & HAMdb
JUN	Autophagy Database & HAMdb
KAT8	Autophagy Database & HAMdb
KEAP1	Autophagy Database & HAMdb
KIAA0226	Autophagy Database & HAMdb
KLHL24	Autophagy Database & HAMdb
KRAS	Autophagy Database & HAMdb
LAMP1	Autophagy Database & HAMdb
LAMP2	Autophagy Database & HAMdb
LRSAM1	Autophagy Database & HAMdb
MAP1LC3A	Autophagy Database & HAMdb
MAP1LC3B	Autophagy Database & HAMdb
MAP1LC3C	Autophagy Database & HAMdb
MAP2K1	Autophagy Database & HAMdb
MAP2K2	Autophagy Database & HAMdb
MAP2K4	Autophagy Database & HAMdb
MAP2K7	Autophagy Database & HAMdb
MAP3K14	Autophagy Database & HAMdb
MAP4K3	Autophagy Database & HAMdb
MAPK1	Autophagy Database & HAMdb
MAPK10	Autophagy Database & HAMdb
MAPK14	Autophagy Database & HAMdb
MAPK3	Autophagy Database & HAMdb
MAPK8	Autophagy Database & HAMdb
MAPK8IP1	Autophagy Database & HAMdb
MAPK9	Autophagy Database & HAMdb
MAPKAP1	Autophagy Database & HAMdb
MFN1	Autophagy Database & HAMdb
MFN2	Autophagy Database & HAMdb
MITF	Autophagy Database & HAMdb
MLST8	Autophagy Database & HAMdb
MTMR14	Autophagy Database & HAMdb
MTMR3	Autophagy Database & HAMdb
MTOR	Autophagy Database & HAMdb
MYD88	Autophagy Database & HAMdb
NBR1	Autophagy Database & HAMdb
NCOA4	Autophagy Database & HAMdb
NFE2L2	Autophagy Database & HAMdb
NFKB1	Autophagy Database & HAMdb
NFKBIA	Autophagy Database & HAMdb
NFKBIB	Autophagy Database & HAMdb
NFKBID	Autophagy Database & HAMdb
NFKBIE	Autophagy Database & HAMdb
NFKBIZ	Autophagy Database & HAMdb
NGF	Autophagy Database & HAMdb
NLRP4	Autophagy Database & HAMdb
NLRP6	Autophagy Database & HAMdb
NOD1	Autophagy Database & HAMdb
NOD2	Autophagy Database & HAMdb
NRAS	Autophagy Database & HAMdb
NRBF2	Autophagy Database & HAMdb
OPA1	Autophagy Database & HAMdb
PAK1	Autophagy Database & HAMdb
PARK2	Autophagy Database & HAMdb
PDK1	Autophagy Database & HAMdb
PDPK1	Autophagy Database & HAMdb
PEX5	Autophagy Database & HAMdb
PGAM5	Autophagy Database & HAMdb
PIK3C2A	Autophagy Database & HAMdb
PIK3C2B	Autophagy Database & HAMdb
PIK3C3	Autophagy Database & HAMdb
PIK3CA	Autophagy Database & HAMdb
PIK3CB	Autophagy Database & HAMdb
PIK3R4	Autophagy Database & HAMdb
PINK1	Autophagy Database & HAMdb
PIP4K2A	Autophagy Database & HAMdb
PIP4K2B	Autophagy Database & HAMdb
PLCG1	Autophagy Database & HAMdb
PLD1	Autophagy Database & HAMdb
PLD2	Autophagy Database & HAMdb
PPP2CA	Autophagy Database & HAMdb
PPP2CB	Autophagy Database & HAMdb
PPP2R1A	Autophagy Database & HAMdb
PPP2R1B	Autophagy Database & HAMdb
PPP2R2B	Autophagy Database & HAMdb
PPP2R2C	Autophagy Database & HAMdb
PPP2R2D	Autophagy Database & HAMdb
PPP2R3A	Autophagy Database & HAMdb
PPP2R3B	Autophagy Database & HAMdb
PPP2R3C	Autophagy Database & HAMdb
PPP2R5A	Autophagy Database & HAMdb
PPP2R5B	Autophagy Database & HAMdb
PPP2R5C	Autophagy Database & HAMdb
PPP2R5D	Autophagy Database & HAMdb
PPP2R5E	Autophagy Database & HAMdb
PRKAA1	Autophagy Database & HAMdb
PRKAA2	Autophagy Database & HAMdb
PRKAB1	Autophagy Database & HAMdb
PRKCA	Autophagy Database & HAMdb
PRKCB	Autophagy Database & HAMdb
PRKCD	Autophagy Database & HAMdb
PRKCG	Autophagy Database & HAMdb
PRKCQ	Autophagy Database & HAMdb
PRKDC	Autophagy Database & HAMdb
PRR5	Autophagy Database & HAMdb
PTEN	Autophagy Database & HAMdb
RAB12	Autophagy Database & HAMdb
RAB1A	Autophagy Database & HAMdb
RAB33B	Autophagy Database & HAMdb
RAB5A	Autophagy Database & HAMdb
RAB7A	Autophagy Database & HAMdb
RAF1	Autophagy Database & HAMdb
RALA	Autophagy Database & HAMdb
RALB	Autophagy Database & HAMdb
RB1CC1	Autophagy Database & HAMdb
RCAN1	Autophagy Database & HAMdb
RELA	Autophagy Database & HAMdb
RGS19	Autophagy Database & HAMdb
RHEB	Autophagy Database & HAMdb
RICTOR	Autophagy Database & HAMdb
RIPK1	Autophagy Database & HAMdb
RPS6KB1	Autophagy Database & HAMdb
RPTOR	Autophagy Database & HAMdb
RRAGA	Autophagy Database & HAMdb
RRAGB	Autophagy Database & HAMdb
RRAGC	Autophagy Database & HAMdb
RRAGD	Autophagy Database & HAMdb
RUBCN	Autophagy Database & HAMdb
RUNX1	Autophagy Database & HAMdb
RYR2	Autophagy Database & HAMdb
SAR1A	Autophagy Database & HAMdb
SCOC	Autophagy Database & HAMdb
SESN1	Autophagy Database & HAMdb
SESN2	Autophagy Database & HAMdb
SH3GLB1	Autophagy Database & HAMdb
SHC1	Autophagy Database & HAMdb
SIDT2	Autophagy Database & HAMdb
SIK2	Autophagy Database & HAMdb
SIN3A	Autophagy Database & HAMdb
SIN3B	Autophagy Database & HAMdb
SIRT1	Autophagy Database & HAMdb
SLC1A5	Autophagy Database & HAMdb
SLC3A2	Autophagy Database & HAMdb
SLC7A5	Autophagy Database & HAMdb
SMPD1	Autophagy Database & HAMdb
SNAP29	Autophagy Database & HAMdb
SOD1	Autophagy Database & HAMdb
SOD2	Autophagy Database & HAMdb
SOS1	Autophagy Database & HAMdb
SQSTM1	Autophagy Database & HAMdb
STK11	Autophagy Database & HAMdb
STK38	Autophagy Database & HAMdb
STX17	Autophagy Database & HAMdb
STX7	Autophagy Database & HAMdb
STX8	Autophagy Database & HAMdb
SUPT20H	Autophagy Database & HAMdb
TBC1D14	Autophagy Database & HAMdb
TBC1D25	Autophagy Database & HAMdb
TBC1D4	Autophagy Database & HAMdb
TBC1D5	Autophagy Database & HAMdb
TBC1D7	Autophagy Database & HAMdb
TBK1	Autophagy Database & HAMdb
TECPR1	Autophagy Database & HAMdb
TELO2	Autophagy Database & HAMdb
TFE3	Autophagy Database & HAMdb
TFEB	Autophagy Database & HAMdb
TIGAR	Autophagy Database & HAMdb
TM9SF1	Autophagy Database & HAMdb
TMEM173	Autophagy Database & HAMdb
TMEM74	Autophagy Database & HAMdb
TOMM7	Autophagy Database & HAMdb
TP53INP2	Autophagy Database & HAMdb
TRADD	Autophagy Database & HAMdb
TRAF1	Autophagy Database & HAMdb
TRAF2	Autophagy Database & HAMdb
TRAF6	Autophagy Database & HAMdb
TRAPPC1	Autophagy Database & HAMdb
TRAPPC10	Autophagy Database & HAMdb
TRAPPC2	Autophagy Database & HAMdb
TRAPPC3	Autophagy Database & HAMdb
TRAPPC4	Autophagy Database & HAMdb
TRAPPC5	Autophagy Database & HAMdb
TRAPPC6A	Autophagy Database & HAMdb
TRAPPC8	Autophagy Database & HAMdb
TRAPPC9	Autophagy Database & HAMdb
TSC1	Autophagy Database & HAMdb
TSC2	Autophagy Database & HAMdb
UBB	Autophagy Database & HAMdb
UBC	Autophagy Database & HAMdb
UBE2A	Autophagy Database & HAMdb
UBE2D2	Autophagy Database & HAMdb
UBE2D3	Autophagy Database & HAMdb
UBE2L3	Autophagy Database & HAMdb
UBE2N	Autophagy Database & HAMdb
ULK1	Autophagy Database & HAMdb
ULK2	Autophagy Database & HAMdb
ULK3	Autophagy Database & HAMdb
UVRAG	Autophagy Database & HAMdb
VAMP3	Autophagy Database & HAMdb
VAMP7	Autophagy Database & HAMdb
VAMP8	Autophagy Database & HAMdb
VCP	Autophagy Database & HAMdb
VDAC1	Autophagy Database & HAMdb
VDAC2	Autophagy Database & HAMdb
VDAC3	Autophagy Database & HAMdb
VMP1	Autophagy Database & HAMdb
VPS13A	Autophagy Database & HAMdb
VPS16	Autophagy Database & HAMdb
VPS18	Autophagy Database & HAMdb
VPS33A	Autophagy Database & HAMdb
VPS39	Autophagy Database & HAMdb
VPS41	Autophagy Database & HAMdb
VTI1B	Autophagy Database & HAMdb
WAC	Autophagy Database & HAMdb
WDFY3	Autophagy Database & HAMdb
WDR45	Autophagy Database & HAMdb
WDR45B	Autophagy Database & HAMdb
WIPI1	Autophagy Database & HAMdb
WIPI2	Autophagy Database & HAMdb
ZFYVE1	Autophagy Database & HAMdb

## Sheet: Supplementary Table 3
Univariate Cox proportional hazards analysis						Multivariate Cox proportional hazards analysis
Id	HR	HR.95L	HR.95H	P-value		Id	coef	HR	HR.95L	HR.95H	pvalue
MIR4435-2HG	1.52201	1.12417	2.06065	0.00658629		MIR4435-2HG	0.324183	1.3829	0.998262	1.91574	0.0512354
PCED1B-AS1	0.630079	0.477606	0.831226	0.00108443		PCED1B-AS1	-0.398279	0.671475	0.495314	0.910288	0.0103055
AL512274.1	0.791025	0.67159	0.931699	0.00499919		AL512274.1	-0.177877	0.837046	0.698193	1.00351	0.0545958
MYOSLID	1.40838	1.19879	1.65461	3.11e-05		LINC02541	0.201905	1.22373	0.978361	1.53064	0.0770006
LINC01871	0.78428	0.664463	0.925703	0.00407032		AL354836.1	-0.178296	0.836694	0.683383	1.0244	0.0842534
LINC02541	1.34236	1.08599	1.65925	0.00647296		MIR9-3HG	-0.250673	0.778277	0.598759	1.01162	0.0609818
AC012236.1	0.562281	0.385787	0.81952	0.00273991
C5orf66-AS1	0.809986	0.699284	0.938213	0.00494568
AC004687.1	0.553909	0.395576	0.775617	0.000583279
AL354836.1	0.773803	0.638271	0.938114	0.00904832
LINC02454	1.45737	1.10858	1.91589	0.0069648
AC024075.2	0.543929	0.378713	0.78122	0.000978638
LINC00460	1.38244	1.15762	1.65093	0.00034862
AATBC	0.626234	0.456591	0.858906	0.00368998
ITGB2-AS1	0.525721	0.345882	0.799066	0.00261204
MIR9-3HG	0.698931	0.552381	0.884362	0.00284953
AF131215.5	0.588828	0.400111	0.866556	0.00722074

## Sheet: Supplementary Table 4
List of survival time, status, and risk-score of TCGA-retrieved HNSC patients
id	futime	fustat	risk-score	risk	type
TCGA-CV-6943-01A	1.64932	1	0.766728	low	train_group
TCGA-CV-6959-01A	0.70137	1	1.47273	high	train_group
TCGA-CV-7413-01A	0.805479	1	1.11483	high	train_group
TCGA-CQ-5331-01A	3.83288	0	0.949303	low	train_group
TCGA-CV-A45W-01A	3.83014	1	0.536597	low	train_group
TCGA-CQ-7063-01A	5.84384	0	0.960576	low	train_group
TCGA-CV-A45T-01A	13.3041	1	0.403724	low	train_group
TCGA-CV-6937-01A	1.70959	1	1.45253	high	train_group
TCGA-CN-4729-01A	1.07397	0	0.630372	low	train_group
TCGA-CV-7089-01A	5.40274	1	1.0663	low	train_group
TCGA-BA-4075-01A	0.775342	1	6.47054	high	train_group
TCGA-CV-7429-01A	0.293151	1	2.25287	high	train_group
TCGA-H7-A6C4-01A	1.13425	1	0.965333	low	train_group
TCGA-CV-7102-01A	0.153425	1	1.89	high	train_group
TCGA-QK-A6VC-01A	1.64384	0	0.88846	low	train_group
TCGA-CN-6998-01A	0.978082	1	2.20897	high	train_group
TCGA-CV-6941-01A	0.936986	1	1.33281	high	train_group
TCGA-CN-4727-01A	4.27397	0	1.096	high	train_group
TCGA-BB-A5HY-01A	0.879452	1	2.33534	high	train_group
TCGA-H7-A76A-01A	1.74521	0	0.167592	low	train_group
TCGA-CR-7386-01A	3.91781	0	1.77833	high	train_group
TCGA-CV-7410-01A	17.5808	1	0.632684	low	train_group
TCGA-BB-4225-01A	0.4	0	0.42841	low	train_group
TCGA-T2-A6WZ-01A	1.32603	1	0.922135	low	train_group
TCGA-HD-8314-01A	1.83562	0	0.622171	low	train_group
TCGA-CN-A642-01A	0.224658	1	1.38878	high	train_group
TCGA-DQ-7591-01A	1.70411	0	0.326662	low	train_group
TCGA-HD-8634-01A	1.05479	1	0.898805	low	train_group
TCGA-CR-7372-01A	2.07945	0	1.63685	high	train_group
TCGA-HD-8224-01A	1.22192	1	0.641903	low	train_group
TCGA-CV-A45P-01A	1.75068	0	0.931392	low	train_group
TCGA-CQ-5332-01A	0.868493	1	2.49747	high	train_group
TCGA-CQ-6224-01A	4.71507	0	2.14627	high	train_group
TCGA-QK-AA3J-01A	1.27671	0	0.792202	low	train_group
TCGA-BA-4077-01B	3.10685	1	0.555434	low	train_group
TCGA-CQ-A4C7-01A	0.967123	1	1.68793	high	train_group
TCGA-CQ-A4CB-01A	2.44658	0	1.60699	high	train_group
TCGA-CR-7392-01A	3.90411	0	0.949688	low	train_group
TCGA-CR-6471-01A	3.29315	1	0.543375	low	train_group
TCGA-UF-A7JT-01A	2.72055	1	0.694803	low	train_group
TCGA-QK-A6IF-01A	1.92877	0	0.333393	low	train_group
TCGA-QK-A6IJ-01A	1.06027	0	0.529365	low	train_group
TCGA-UF-A7JD-01A	2.02466	1	2.43302	high	train_group
TCGA-RS-A6TP-01A	1.4137	0	0.393294	low	train_group
TCGA-CV-6948-01A	3.53151	1	1.21943	high	train_group
TCGA-CV-7101-01A	0.438356	1	0.677443	low	train_group
TCGA-CV-7247-01A	1.58082	1	1.97162	high	train_group
TCGA-DQ-5624-01A	4.87123	0	1.34449	high	train_group
TCGA-MZ-A7D7-01A	1.49863	0	2.90034	high	train_group
TCGA-BA-5153-01A	4.8274	1	0.346446	low	train_group
TCGA-BB-8596-01A	5.92055	0	1.39615	high	train_group
TCGA-CR-7369-01A	2.9863	1	0.593634	low	train_group
TCGA-BA-A6DB-01A	0.591781	0	0.590643	low	train_group
TCGA-CV-5439-01A	1.49589	1	1.15281	high	train_group
TCGA-BA-A4IF-01A	2.45205	0	0.779281	low	train_group
TCGA-CV-5971-01A	1.92055	0	1.44182	high	train_group
TCGA-D6-A4Z9-01A	1.47671	0	0.732696	low	train_group
TCGA-CX-7085-01A	0.879452	0	0.694636	low	train_group
TCGA-F7-A50J-01A	2.59452	0	0.873362	low	train_group
TCGA-CQ-6228-01A	1.24932	1	2.1324	high	train_group
TCGA-CQ-6222-01A	5.52329	0	0.850291	low	train_group
TCGA-IQ-7630-01A	1.32877	0	1.51247	high	train_group
TCGA-D6-6825-01A	1.34521	0	0.664908	low	train_group
TCGA-CR-6477-01A	1.40822	0	0.719404	low	train_group
TCGA-WA-A7H4-01A	1.2137	0	1.63925	high	train_group
TCGA-BA-5558-01A	5.46575	0	0.927393	low	train_group
TCGA-CV-6954-01A	5.48493	1	2.49356	high	train_group
TCGA-CR-7395-01A	2.54795	0	0.711386	low	train_group
TCGA-D6-A6EQ-01A	1.00822	0	0.973357	low	train_group
TCGA-CN-4722-01A	4.06301	0	0.881406	low	train_group
TCGA-CV-A45U-01A	2.95616	1	0.757133	low	train_group
TCGA-CR-5248-01A	4.55616	0	0.168015	low	train_group
TCGA-CV-6962-01A	0.345205	1	2.15801	high	train_group
TCGA-CR-6491-01A	1.89863	0	1.07506	high	train_group
TCGA-CV-7242-01A	3	0	0.482541	low	train_group
TCGA-CV-A45R-01A	15.0137	0	0.545614	low	train_group
TCGA-KU-A66T-01A	1.51233	0	1.59524	high	train_group
TCGA-CQ-6219-01A	1.31233	1	1.63649	high	train_group
TCGA-CN-A497-01A	2.91781	0	0.518017	low	train_group
TCGA-CR-7365-01A	3.26301	0	1.40443	high	train_group
TCGA-CQ-A4CD-01A	2.8	0	1.45853	high	train_group
TCGA-HL-7533-01A	2.89589	0	0.688189	low	train_group
TCGA-T2-A6X2-01A	2.70411	0	1.05202	low	train_group
TCGA-CN-6020-01A	0.561644	1	1.51126	high	train_group
TCGA-BA-A6DJ-01A	1.11507	1	0.771513	low	train_group
TCGA-CN-5355-01A	3.50137	0	1.08306	high	train_group
TCGA-CR-6488-01A	1.03836	0	1.03577	low	train_group
TCGA-CV-5977-01A	5.0411	0	1.23214	high	train_group
TCGA-CR-7364-01A	3.93151	0	0.772783	low	train_group
TCGA-QK-A6II-01A	0.778082	1	2.19331	high	train_group
TCGA-UF-A71D-01A	4.00274	0	0.484102	low	train_group
TCGA-CR-6492-01A	1.31233	0	0.697234	low	train_group
TCGA-CV-7104-01A	1.07671	1	1.34639	high	train_group
TCGA-CN-A49C-01A	1.76712	0	0.35799	low	train_group
TCGA-CV-7238-01A	7.47123	0	0.753969	low	train_group
TCGA-CV-7099-01A	0.665753	1	0.985311	low	train_group
TCGA-QK-A6VB-01A	1.75616	0	1.12722	high	train_group
TCGA-CV-6956-01A	0.594521	1	1.15917	high	train_group
TCGA-MT-A51W-01A	1.19726	0	1.00211	low	train_group
TCGA-CV-6953-01A	4.49589	1	0.624677	low	train_group
TCGA-CN-4738-01A	1.19452	1	0.702924	low	train_group
TCGA-BA-A6DA-01A	0.961644	0	1.14284	high	train_group
TCGA-CQ-5334-01A	0.353425	1	1.405	high	train_group
TCGA-CV-7437-01A	1.3863	1	3.20844	high	train_group
TCGA-CV-7250-01A	7.94521	1	0.971002	low	train_group
TCGA-CV-5432-01A	10.7671	0	1.32887	high	train_group
TCGA-CV-6934-01A	0.178082	1	1.62801	high	train_group
TCGA-CN-5356-01A	3.86027	0	1.41973	high	train_group
TCGA-CN-A498-01A	2.11781	1	1.00276	low	train_group
TCGA-CQ-6225-01A	1.10411	1	1.27245	high	train_group
TCGA-CN-4737-01A	1.71233	0	1.10889	high	train_group
TCGA-CN-A63T-01A	0.616438	0	0.674391	low	train_group
TCGA-F7-A50I-01A	0.252055	0	1.3896	high	train_group
TCGA-CV-7407-01A	2.96164	1	1.14058	high	train_group
TCGA-CV-6938-01A	0.394521	1	1.01216	low	train_group
TCGA-CN-6022-01A	0.769863	1	1.51087	high	train_group
TCGA-CV-6933-01A	7.50959	1	1.55418	high	train_group
TCGA-DQ-5630-01A	2.82192	0	1.55174	high	train_group
TCGA-BA-4074-01A	1.26575	1	2.94194	high	train_group
TCGA-IQ-A61J-01A	2.79726	0	1.06989	high	train_group
TCGA-CV-A45Z-01A	4.01644	1	0.991618	low	train_group
TCGA-CN-4742-01A	1.08767	1	1.70046	high	train_group
TCGA-CV-A461-01A	5.65479	1	0.38779	low	train_group
TCGA-CR-7388-01A	2.25479	1	0.817799	low	train_group
TCGA-CR-7374-01A	0.0821918	0	0.869724	low	train_group
TCGA-P3-A6T4-01A	0.169863	1	1.23916	high	train_group
TCGA-QK-A6V9-01A	2.28219	0	0.219752	low	train_group
TCGA-CV-5973-01A	7.23562	0	1.02063	low	train_group
TCGA-CV-6935-01A	0.808219	1	1.70325	high	train_group
TCGA-CN-6017-01A	2.33699	1	0.946853	low	train_group
TCGA-CR-7401-01A	2.95068	0	1.6735	high	train_group
TCGA-CR-6493-01A	0.772603	1	1.85228	high	train_group
TCGA-BA-4076-01A	1.13699	1	1.46974	high	train_group
TCGA-CV-7095-01A	1.56712	1	1.42426	high	train_group
TCGA-CV-A6JM-01A	0.531507	1	1.37278	high	train_group
TCGA-QK-AA3K-01A	0.693151	0	1.95499	high	train_group
TCGA-BB-4224-01A	0.761644	0	1.24142	high	train_group
TCGA-CN-4735-01A	4.7589	0	0.880993	low	train_group
TCGA-CV-6945-01A	1.00274	1	1.40961	high	train_group
TCGA-CV-6955-01A	0.915068	1	0.678232	low	train_group
TCGA-P3-A6T8-01A	1.09589	0	1.59034	high	train_group
TCGA-CV-6936-01A	0.454795	1	0.841621	low	train_group
TCGA-CR-5247-01A	0.980822	0	2.27506	high	train_group
TCGA-MT-A7BN-01A	1.28493	0	0.95874	low	train_group
TCGA-CN-A499-01A	1.96438	0	0.453382	low	train_group
TCGA-CV-7103-01A	4.3589	1	2.24426	high	train_group
TCGA-CV-A45Q-01A	14.1151	1	1.26101	high	train_group
TCGA-BA-6873-01A	0.334247	0	1.63658	high	train_group
TCGA-UF-A7JV-01A	0.246575	1	1.23705	high	train_group
TCGA-BA-4078-01A	0.756164	1	1.27333	high	train_group
TCGA-CV-6441-01A	0.8	1	1.06962	low	train_group
TCGA-CV-7434-01A	0.59726	1	1.74265	high	train_group
TCGA-CQ-7069-01A	3.49041	0	1.60416	high	train_group
TCGA-BA-6868-01B	1.29315	1	1.96146	high	train_group
TCGA-CN-6992-01A	2.92055	0	0.902028	low	train_group
TCGA-HD-8635-01A	1.90411	0	1.07072	high	train_group
TCGA-CV-7423-01A	8.38082	1	1.29841	high	train_group
TCGA-KU-A6H7-06A	1.60548	0	0.246123	low	train_group
TCGA-CR-6470-01A	4.16712	0	0.362786	low	train_group
TCGA-CV-A6JU-01A	0.30137	0	1.17337	high	train_group
TCGA-CV-7427-01A	13.0411	1	0.918275	low	train_group
TCGA-CV-A6JT-01A	2.33425	0	0.985676	low	train_group
TCGA-DQ-5629-01A	2.57808	1	2.36238	high	train_group
TCGA-BA-A4IH-01A	1.70411	0	0.580605	low	train_group
TCGA-D6-A6EK-01A	2.39726	0	0.541665	low	train_group
TCGA-P3-A6T0-01A	1.58356	0	1.72127	high	train_group
TCGA-CR-7383-01A	1.4274	1	1.25121	high	train_group
TCGA-D6-A4ZB-01A	1.03014	0	0.467182	low	train_group
TCGA-BA-A4II-01A	2.51507	0	1.69815	high	train_group
TCGA-UP-A6WW-01A	1.41918	0	0.266383	low	train_group
TCGA-CV-7438-01A	0.531507	1	2.64723	high	train_group
TCGA-QK-A8Z9-01B	1.23014	1	1.83195	high	train_group
TCGA-UF-A7JO-01A	1.72877	1	0.599341	low	train_group
TCGA-CV-7180-01A	0.89589	1	1.00309	low	train_group
TCGA-D6-A6EO-01A	2.07945	0	0.699933	low	train_group
TCGA-UF-A7JF-01A	4.61918	0	0.588088	low	train_group
TCGA-CV-7428-01A	4.57808	1	1.09215	high	train_group
TCGA-D6-A6ES-01A	1.06575	0	1.399	high	train_group
TCGA-D6-A6EN-01A	1.88219	0	1.06368	low	train_group
TCGA-CR-7394-01A	3.68767	0	0.547182	low	train_group
TCGA-TN-A7HL-01A	1.69589	0	0.290095	low	train_group
TCGA-CQ-6218-01A	3.43288	0	1.53242	high	train_group
TCGA-MT-A67D-01A	0.153425	0	0.927035	low	train_group
TCGA-CQ-7072-01A	6.46301	0	2.02944	high	train_group
TCGA-BB-A6UM-01A	1.07671	0	0.309322	low	train_group
TCGA-MT-A67F-01A	1.05205	0	0.792571	low	train_group
TCGA-BA-A8YP-01A	1.36712	0	1.77332	high	train_group
TCGA-CN-A49B-01A	2.47671	0	0.636336	low	train_group
TCGA-CV-7183-01A	10.9068	0	1.15257	high	train_group
TCGA-CN-4736-01A	1.08219	1	1.02759	low	train_group
TCGA-CV-A6K1-01A	1.87671	0	0.814431	low	train_group
TCGA-P3-A5QF-01A	0.90411	1	0.577789	low	train_group
TCGA-CV-6960-01A	2.36164	1	3.09484	high	train_group
TCGA-CV-A6JZ-01A	1.95616	0	0.831	low	train_group
TCGA-MZ-A6I9-01A	1.33973	1	0.35202	low	train_group
TCGA-CV-6433-01A	1.75616	0	0.302525	low	train_group
TCGA-CR-6467-01A	4.86849	0	0.22394	low	train_group
TCGA-CN-4726-01A	0.389041	1	2.7477	high	train_group
TCGA-CN-5359-01A	1.03288	1	1.07213	high	train_group
TCGA-BA-6869-01A	1.76438	0	0.682491	low	train_group
TCGA-TN-A7HI-01A	1.12877	0	0.538024	low	train_group
TCGA-CV-5970-01A	1.11233	1	1.29751	high	train_group
TCGA-CQ-7065-01A	4.46027	0	0.963683	low	train_group
TCGA-QK-A8Z8-01A	0.468493	1	0.843292	low	train_group
TCGA-F7-A623-01A	1.68767	0	0.849557	low	train_group
TCGA-P3-A6SW-01A	3.06849	0	0.116737	low	train_group
TCGA-CR-7368-01A	3.41096	0	0.462713	low	train_group
TCGA-CQ-A4C9-01A	1.93699	0	0.80875	low	train_group
TCGA-D6-6823-01A	1.92055	0	1.09516	high	train_group
TCGA-CN-6012-01A	4	0	1.00723	low	train_group
TCGA-CR-7393-01A	2.72055	0	0.750249	low	train_group
TCGA-CN-6994-01A	3.2411	0	1.38475	high	train_group
TCGA-MT-A67A-01A	2.50411	0	0.561284	low	train_group
TCGA-CN-A63U-01A	2.6411	0	0.313207	low	train_group
TCGA-CV-7418-01A	2.16164	1	2.31944	high	train_group
TCGA-IQ-A6SG-01A	1.5863	0	1.31181	high	train_group
TCGA-BA-6872-01A	1.05205	1	1.5096	high	train_group
TCGA-CV-A460-01A	5.03562	1	0.852746	low	train_group
TCGA-BB-4227-01A	0.367123	0	1.94973	high	train_group
TCGA-CV-7415-01A	1.90411	1	1.9428	high	train_group
TCGA-CR-7385-01A	2.73151	0	0.41093	low	train_group
TCGA-KU-A6H7-01A	1.60548	0	0.247968	low	train_group
TCGA-CQ-A4CI-01A	2.60274	0	1.50346	high	train_group
TCGA-BB-A5HU-01A	2.14247	0	1.81919	high	train_group
TCGA-HD-A634-01A	0.356164	1	1.37106	high	train_group
TCGA-CV-6436-01A	5.20274	0	1.01064	low	train_group
TCGA-CV-5434-01A	9.07945	1	1.52137	high	train_group
TCGA-D6-8568-01A	2.07945	0	1.47583	high	train_group
TCGA-CN-A6UY-01A	1.95342	0	0.245014	low	train_group
TCGA-P3-A5Q6-01A	1.31507	1	2.81293	high	train_group
TCGA-CN-A49A-01A	1.4411	1	1.54195	high	train_group
TCGA-KU-A6H8-01A	0.89589	1	0.813721	low	train_group
TCGA-CR-7370-01A	0.287671	0	1.59168	high	train_group
TCGA-CN-A6V3-01A	2.03288	0	0.819365	low	train_group
TCGA-CN-5367-01A	0.964384	1	1.72067	high	train_group
TCGA-CV-7435-01A	12.8219	1	1.7764	high	train_group
TCGA-F7-A622-01A	0.983562	1	1.61819	high	train_group
TCGA-UF-A7JA-01A	6.20548	0	1.16409	high	train_group
TCGA-BA-A6DD-01A	0.473973	1	0.942406	low	train_group
TCGA-TN-A7HJ-01A	1.10411	0	0.719057	low	train_group
TCGA-P3-A5Q5-01A	2.49315	0	0.108449	low	train_group
TCGA-UF-A71A-06A	0.235616	1	2.8465	high	train_group
TCGA-BA-A4IG-01A	2.34247	0	0.992233	low	train_group
TCGA-D6-6517-01A	0.8	0	1.89815	high	train_group
TCGA-DQ-7592-01A	3.13151	0	1.32786	high	train_group
TCGA-CN-6988-01A	0.871233	0	0.506754	low	train_group
TCGA-P3-A6T6-01A	1.08219	1	0.360876	low	train_group
TCGA-CV-5435-01A	6.35342	1	1.86485	high	train_group
TCGA-BA-7269-01A	3.48767	0	3.07059	high	train_group
TCGA-CR-7371-01A	0.257534	1	1.3138	high	train_group
TCGA-CR-6482-01A	0.945205	0	0.29599	low	train_group
TCGA-CV-7440-01A	1.84932	1	1.36417	high	train_group
TCGA-BA-5555-01A	1.42466	0	1.40481	high	train_group
TCGA-CV-7091-01A	9.26301	0	1.16791	high	train_group
TCGA-CV-5442-01A	6.37534	0	0.840744	low	train_group
TCGA-CV-6940-01A	2.20274	1	1.1711	high	train_group
TCGA-CN-6996-01A	1.45205	1	0.734995	low	train_group
TCGA-CN-5361-01A	5.80822	1	3.23068	high	train_group
TCGA-IQ-A61E-01A	3.14247	0	1.08844	high	train_group
TCGA-RS-A6TO-01A	1.06027	1	1.72175	high	train_group
TCGA-CN-4741-01A	6.13425	0	0.398847	low	train_group
TCGA-CN-5366-01A	0.986301	1	1.80829	high	train_group
TCGA-CN-4731-01A	2.73425	1	1.84357	high	train_group
TCGA-CQ-A4CG-01A	1.17808	1	2.14634	high	train_group
TCGA-IQ-A61O-01A	1.15342	1	2.95742	high	train_group
TCGA-CV-A6JD-01A	0.49863	1	1.73548	high	train_group
TCGA-T2-A6WX-01A	0.572603	1	0.5953	low	train_group
TCGA-P3-A6T3-01A	1.58082	1	1.61126	high	train_group
TCGA-UF-A7JH-01A	2.45479	0	1.04969	low	train_group
TCGA-CV-A45Y-01A	7.40548	1	0.756264	low	train_group
TCGA-CQ-6220-01A	2.69863	1	1.43898	high	train_group
TCGA-CR-6472-01A	2.87671	0	0.82645	low	train_group
TCGA-CV-6942-01A	11.7315	0	0.597207	low	train_group
TCGA-CN-6024-01A	0.923288	1	1.8828	high	train_group
TCGA-CN-6011-01A	2.55616	0	1.36421	high	train_group
TCGA-CR-6480-01A	0.991781	0	0.34866	low	train_group
TCGA-BB-4217-01A	0.512329	0	0.500872	low	train_group
TCGA-CQ-5324-01A	4.36438	0	1.53301	high	train_group
TCGA-D6-A74Q-01A	1.94521	0	0.339255	low	train_group
TCGA-CV-7255-01A	0.175342	1	1.09725	high	train_group
TCGA-BA-6871-01A	0.29589	1	1.37945	high	train_group
TCGA-CV-A6JO-01B	0.539726	1	1.53012	high	train_group
TCGA-CR-7404-01A	4.03288	0	0.238378	low	train_group
TCGA-UF-A719-01A	4.55616	0	0.833546	low	train_group
TCGA-CQ-6227-01A	0.353425	1	1.64996	high	train_group
TCGA-CN-4728-01A	4.72329	0	0.949886	low	train_group
TCGA-CV-7090-01A	14.389	0	1.45487	high	train_group
TCGA-CN-4733-01A	4.34521	0	0.863774	low	train_group
TCGA-CR-7390-01A	4.13151	0	1.21119	high	train_group
TCGA-CV-A45X-01A	0.542466	1	1.06532	low	train_group
TCGA-IQ-A6SH-01A	1.29041	0	0.773962	low	train_group
TCGA-C9-A47Z-01A	0.523288	1	1.25691	high	train_group
TCGA-CN-6010-01A	4.1726	0	1.6164	high	train_group
TCGA-HD-A6HZ-01A	0.30411	0	0.582559	low	train_group
TCGA-HD-7831-01A	1.8274	0	2.70132	high	test_group
TCGA-H7-7774-01A	1.11507	0	0.632259	low	test_group
TCGA-CN-5374-01A	4.74521	1	0.323603	low	test_group
TCGA-F7-A61V-01A	2.07945	0	0.7885	low	test_group
TCGA-QK-A64Z-01A	1.75616	1	1.63382	high	test_group
TCGA-CR-5249-01A	3.15616	0	0.365364	low	test_group
TCGA-BB-8601-01A	1.70959	0	2.97796	high	test_group
TCGA-CN-5373-01A	4.33973	0	1.2903	high	test_group
TCGA-CV-5444-01A	6.67671	0	1.06282	low	test_group
TCGA-D6-8569-01A	2.10959	0	1.11763	low	test_group
TCGA-QK-A8ZB-01A	1.48493	0	1.22706	high	test_group
TCGA-CR-5250-01A	2.18904	0	0.233376	low	test_group
TCGA-T3-A92M-01A	1.14247	0	1.2122	high	test_group
TCGA-CN-5365-01A	0.961644	1	1.51635	high	test_group
TCGA-QK-A652-01A	1.76712	0	0.767932	low	test_group
TCGA-F7-8298-01A	2.72603	0	1.57731	high	test_group
TCGA-CV-7416-01A	2.09041	1	2.31113	high	test_group
TCGA-CV-7568-01A	2.53973	1	2.11568	high	test_group
TCGA-KU-A66S-01A	1.11233	1	0.798296	low	test_group
TCGA-CV-7263-01A	1.53425	1	0.711463	low	test_group
TCGA-CN-4723-01A	4.65479	0	0.898747	low	test_group
TCGA-CN-6997-01A	2.70685	1	3.10386	high	test_group
TCGA-CN-5364-01A	1.35068	1	1.34936	high	test_group
TCGA-CN-A63V-01A	1.86027	0	1.78912	high	test_group
TCGA-CQ-5325-01A	1.79178	1	0.98401	low	test_group
TCGA-CX-A4AQ-01A	4.26027	0	0.34039	low	test_group
TCGA-D6-A6EM-01A	0.635616	0	0.721361	low	test_group
TCGA-BB-A6UO-01A	0.734247	1	1.97561	high	test_group
TCGA-CN-4739-01A	3.81918	1	0.448262	low	test_group
TCGA-CR-7398-01A	0.427397	0	0.871018	low	test_group
TCGA-BB-A5HZ-01A	2.26575	0	1.32002	high	test_group
TCGA-CV-7424-01A	1.2411	1	1.40301	high	test_group
TCGA-HD-7832-01A	2.29041	0	2.09919	high	test_group
TCGA-F7-7848-01A	3.09863	0	0.409198	low	test_group
TCGA-CN-A63W-01A	1.03288	1	1.13198	low	test_group
TCGA-BA-5557-01A	1.70685	0	2.19122	high	test_group
TCGA-CV-7248-01A	1.4274	1	0.630807	low	test_group
TCGA-CR-7399-01A	0.49589	0	1.36973	high	test_group
TCGA-H7-8502-01A	1.25479	0	2.29732	high	test_group
TCGA-CN-6989-01A	2.68493	1	1.83595	high	test_group
TCGA-CN-5360-01A	5.94247	0	0.770098	low	test_group
TCGA-CV-A6JY-01A	1.76986	0	0.705536	low	test_group
TCGA-CQ-7071-01A	3.59178	0	1.13764	low	test_group
TCGA-CQ-5327-01A	4.54795	0	1.01918	low	test_group
TCGA-MT-A51X-01A	0.663014	0	1.42117	high	test_group
TCGA-4P-AA8J-01A	0.279452	0	1.44282	high	test_group
TCGA-CN-6995-01A	0.306849	1	1.20707	high	test_group
TCGA-DQ-5631-01A	1.50137	1	1.57655	high	test_group
TCGA-DQ-7588-01A	1.16986	1	2.27533	high	test_group
TCGA-CR-7373-01A	2.43562	0	1.1636	low	test_group
TCGA-D6-A6EP-01A	1.16164	0	1.24784	high	test_group
TCGA-CN-6013-01A	1.99178	1	0.603382	low	test_group
TCGA-CV-6939-01A	1.82466	1	0.645411	low	test_group
TCGA-CN-5358-01A	0.715068	1	0.657483	low	test_group
TCGA-CR-7397-01A	2.06575	0	0.948531	low	test_group
TCGA-CR-7376-01A	2.66301	0	1.02079	low	test_group
TCGA-CV-5976-01A	4.04932	0	2.13462	high	test_group
TCGA-CV-7411-01A	7.44384	1	1.12166	low	test_group
TCGA-CV-A6JN-01A	2.48219	0	0.756877	low	test_group
TCGA-BB-4223-01A	8.82466	0	0.279851	low	test_group
TCGA-CV-A468-01A	1.27123	1	0.630007	low	test_group
TCGA-D6-6516-01A	2.11781	0	0.885628	low	test_group
TCGA-CQ-6229-01A	3.23014	0	1.50655	high	test_group
TCGA-P3-A5QE-01A	4.27123	0	0.306277	low	test_group
TCGA-CV-5443-01A	7.6274	0	0.251139	low	test_group
TCGA-CR-7377-01A	0.764384	1	0.979724	low	test_group
TCGA-HD-7753-01A	2.3726	0	1.82581	high	test_group
TCGA-BA-A6DG-01A	0.189041	1	2.20533	high	test_group
TCGA-F7-A50G-01A	1.68767	0	0.558292	low	test_group
TCGA-CV-5431-01A	1.43014	1	0.981111	low	test_group
TCGA-CN-6021-01A	0.756164	1	0.905676	low	test_group
TCGA-D6-6826-01A	0.953425	1	0.869579	low	test_group
TCGA-UF-A7JJ-01A	1.50411	0	0.763028	low	test_group
TCGA-HD-A633-01A	1.15342	0	1.00672	low	test_group
TCGA-CQ-5323-01A	4.01644	0	0.284989	low	test_group
TCGA-UF-A718-01A	5.4	0	1.46125	high	test_group
TCGA-CQ-5333-01A	0.934247	1	0.783212	low	test_group
TCGA-CN-5363-01A	0.693151	1	2.0438	high	test_group
TCGA-CN-5370-01A	0.709589	1	1.52087	high	test_group
TCGA-UF-A71E-01A	4.12055	1	0.805529	low	test_group
TCGA-CV-7432-01A	7.0411	1	2.57061	high	test_group
TCGA-IQ-A61H-01A	3.11781	0	1.47238	high	test_group
TCGA-CQ-6221-01A	2.73973	0	2.86258	high	test_group
TCGA-CR-6474-01A	1.54521	1	2.75988	high	test_group
TCGA-CV-7406-01A	4.78904	1	0.95081	low	test_group
TCGA-C9-A480-01A	1.05753	0	0.993262	low	test_group
TCGA-D6-6824-01A	0.210959	0	1.05985	low	test_group
TCGA-CV-7252-01A	0.413699	1	1.62972	high	test_group
TCGA-CV-6003-01A	4.56164	0	1.89649	high	test_group
TCGA-CN-4734-01A	4.63014	0	1.15946	low	test_group
TCGA-CV-7236-01A	0.394521	1	2.57719	high	test_group
TCGA-CR-7382-01A	2.18082	0	1.53372	high	test_group
TCGA-CV-7433-01A	1.64658	1	1.49826	high	test_group
TCGA-CN-6023-01A	4.33973	0	2.18046	high	test_group
TCGA-CV-A45V-01A	0.0876712	1	1.06386	low	test_group
TCGA-BA-6870-01A	1.23562	1	0.624246	low	test_group
TCGA-P3-A6SX-01A	3.91781	1	1.79251	high	test_group
TCGA-CR-7379-01A	2.83836	0	1.23726	high	test_group
TCGA-CV-6961-01A	0.208219	1	0.789521	low	test_group
TCGA-F7-A61S-01A	1.57808	0	1.28347	high	test_group
TCGA-BA-A6D8-01A	2.32877	0	1.94191	high	test_group
TCGA-CR-7389-01A	1.07397	0	1.19718	high	test_group
TCGA-CQ-A4CE-01A	2.45753	0	0.600418	low	test_group
TCGA-CV-5436-01A	1.6	1	1.45833	high	test_group
TCGA-CR-6484-01A	0.969863	0	0.606377	low	test_group
TCGA-CV-7100-01A	0.750685	1	1.05857	low	test_group
TCGA-BA-5556-01A	1.9863	0	0.68132	low	test_group
TCGA-F7-8489-01A	1.80274	0	1.02251	low	test_group
TCGA-CV-5979-01A	3.60274	0	2.36167	high	test_group
TCGA-UF-A71B-01A	4.12603	0	1.23987	high	test_group
TCGA-CR-7402-01A	2.49589	0	0.592576	low	test_group
TCGA-CV-7253-01A	0.989041	1	1.69477	high	test_group
TCGA-BA-5152-01A	3.52877	0	1.01577	low	test_group
TCGA-QK-A8Z7-01A	1.07397	0	0.666092	low	test_group
TCGA-T2-A6X0-01A	0.591781	0	0.355845	low	test_group
TCGA-CV-7245-01A	2.18356	0	0.700146	low	test_group
TCGA-P3-A6T2-01A	6.29589	0	1.56279	high	test_group
TCGA-CQ-A4C6-01A	3.70685	0	1.56214	high	test_group
TCGA-CV-6952-01A	0.506849	1	1.32343	high	test_group
TCGA-CQ-5326-01A	0.243836	1	1.7833	high	test_group
TCGA-CN-A6V6-01A	1.73973	0	0.210984	low	test_group
TCGA-CN-4730-01A	2.23836	0	1.07691	low	test_group
TCGA-CN-6019-01A	2.84384	0	1.38108	high	test_group
TCGA-CR-5243-01A	7.01918	0	0.321158	low	test_group
TCGA-CQ-5330-01A	5.19726	0	1.79504	high	test_group
TCGA-D6-6827-01A	1.55616	0	0.574294	low	test_group
TCGA-CV-A45O-01A	2.33151	0	0.802612	low	test_group
TCGA-CR-6487-01A	0.641096	0	0.507276	low	test_group
TCGA-P3-A6T7-01A	1.33425	1	1.1038	low	test_group
TCGA-IQ-A61G-01A	0.986301	0	0.972006	low	test_group
TCGA-CV-7177-01A	1.81644	1	2.34116	high	test_group
TCGA-CV-7446-01A	2.99452	1	1.36473	high	test_group
TCGA-CV-A465-01A	0.589041	1	0.915068	low	test_group
TCGA-CV-5966-01A	1.49315	1	1.51363	high	test_group
TCGA-CR-6473-01A	3.08219	0	0.629085	low	test_group
TCGA-CV-7097-01A	1.05479	1	1.89853	high	test_group
TCGA-HD-A6I0-01A	0.575342	0	1.20484	high	test_group
TCGA-CV-6950-01A	1.25753	1	3.33932	high	test_group
TCGA-UF-A7JK-01A	1.16164	1	1.13886	low	test_group
TCGA-CQ-A4CH-01A	1.03836	1	1.28236	high	test_group
TCGA-CV-7425-01A	4.70685	1	0.741332	low	test_group
TCGA-CV-7254-01A	3.99726	1	1.3412	high	test_group
TCGA-CR-6478-01A	0.50137	1	1.45648	high	test_group
TCGA-HD-7229-01A	2.8137	0	1.87979	high	test_group
TCGA-IQ-7631-01A	3.21096	0	1.78176	high	test_group
TCGA-H7-8501-01A	1.26301	0	1.19866	high	test_group
TCGA-CN-A6V7-01A	1.6274	0	0.405672	low	test_group
TCGA-P3-A6T5-01A	2.41644	1	1.26634	high	test_group
TCGA-CN-4725-01A	3.16986	0	0.975528	low	test_group
TCGA-BA-5151-01A	1.97808	0	1.0487	low	test_group
TCGA-F7-A624-01A	1.03562	0	1.18592	high	test_group
TCGA-BA-A6DL-01A	1.70685	0	0.627058	low	test_group
TCGA-QK-A6IH-01A	1.78904	0	1.35657	high	test_group
TCGA-HD-7754-01A	2.14521	0	0.698761	low	test_group
TCGA-CV-5440-01A	8.9589	0	1.59849	high	test_group
TCGA-MZ-A5BI-01A	0.594521	1	0.267555	low	test_group
TCGA-BB-4228-01A	1.53151	0	0.704425	low	test_group
TCGA-CR-7380-01A	1.66027	1	0.996143	low	test_group
TCGA-BA-A6DE-01A	1.20548	0	0.85871	low	test_group
TCGA-CV-5978-01A	0.589041	1	2.01684	high	test_group
TCGA-CV-A6JE-01A	2.94521	0	1.53805	high	test_group
TCGA-CR-7391-01A	2.50137	0	0.617442	low	test_group
TCGA-BA-A6DI-01A	0.920548	1	1.37759	high	test_group
TCGA-CV-A6K0-01B	1.66027	0	0.745806	low	test_group
TCGA-F7-A620-01A	1.48767	0	0.972713	low	test_group
TCGA-CV-5430-01A	11.6192	0	1.13785	low	test_group
TCGA-CV-7261-01A	4.14247	0	1.98595	high	test_group
TCGA-BA-5559-01A	5.70685	1	0.357903	low	test_group
TCGA-CR-6481-01A	0.852055	0	0.397215	low	test_group
TCGA-T3-A92N-01A	0.260274	1	1.94564	high	test_group
TCGA-UF-A7JC-01A	1.49589	1	1.19846	high	test_group
TCGA-D6-6515-01A	1.10411	1	0.895048	low	test_group
TCGA-IQ-7632-01A	1.20822	0	1.03321	low	test_group
TCGA-CN-4740-01A	2.29863	1	1.31313	high	test_group
TCGA-CN-6018-01A	1.58904	1	2.92695	high	test_group
TCGA-CR-7367-01A	3.94521	0	1.11212	low	test_group
TCGA-CV-A6K2-01A	0.868493	1	1.46336	high	test_group
TCGA-CV-5441-01A	7.90685	0	0.865964	low	test_group
TCGA-CV-7178-01A	5.93425	1	1.08203	low	test_group
TCGA-UF-A7J9-01A	3.72055	0	1.79532	high	test_group
TCGA-CN-6016-01A	3.95342	0	2.32772	high	test_group
TCGA-QK-A6IG-01A	0.608219	1	1.34653	high	test_group
TCGA-CN-A641-01A	1.00548	0	0.809436	low	test_group
TCGA-CX-7219-01A	2.86301	0	1.40879	high	test_group
TCGA-P3-A5QA-01A	5.97808	0	3.04959	high	test_group
TCGA-QK-A8ZA-01A	1.01644	1	1.69101	high	test_group
TCGA-UF-A71A-01A	0.235616	1	2.62147	high	test_group
TCGA-WA-A7GZ-01A	1.71233	1	1.24282	high	test_group
TCGA-CQ-5329-01A	5.87123	0	1.45478	high	test_group
TCGA-CV-7430-01A	1.35616	1	1.3142	high	test_group
TCGA-CQ-6223-01A	3.91233	0	0.881554	low	test_group
TCGA-CV-6951-01A	2.50685	1	1.71104	high	test_group
TCGA-DQ-5625-01A	3.10411	1	1.6097	high	test_group
TCGA-UF-A7JS-01A	1.86301	1	0.990502	low	test_group
TCGA-CQ-7068-01A	3.5863	0	1.01264	low	test_group
TCGA-CV-A464-01A	4.71781	0	1.22335	high	test_group
TCGA-CV-7235-01A	6.43014	0	1.13029	low	test_group
TCGA-CX-7086-01A	1.56986	0	1.18619	high	test_group
TCGA-CV-7422-01A	2.8411	1	1.63847	high	test_group

## Sheet: Supplementary Table 5
DEGs between high- and low- risk patients
geneName	highMean	lowMean	logFC	pValue	fdr
ZFR2	0.0464919	0.429505	-3.20762	5.7e-12	1.41e-10
DRGX	0.0181854	0.161653	-3.15204	2.63e-06	1.63e-05
XKR4	0.0101347	0.0893178	-3.13964	9.2e-07	6.47e-06
CDH7	0.00261059	0.022606	-3.11426	0.00103085	0.003026
MAJIN	0.0261993	0.217658	-3.05447	1.5e-12	4.32e-11
INSL6	0.0127183	0.104644	-3.04051	4.29e-09	5.46e-08
IL17REL	0.0515435	0.396534	-2.94358	8.27e-11	1.61e-09
SERPINI2	0.0153345	0.115756	-2.91624	1.04e-10	1.99e-09
ZNF541	0.106991	0.682609	-2.67357	7.45e-15	3.45e-13
FRMD1	0.021011	0.125427	-2.57764	0.0182554	0.0356225
SPIC	0.0165313	0.0965589	-2.54621	5.16e-15	2.43e-13
UPB1	0.0393168	0.228296	-2.53769	1.86e-12	5.24e-11
KCNA2	0.0353503	0.193289	-2.45096	3.11e-13	1.03e-11
FCRL4	0.0207597	0.11105	-2.41935	3.34e-13	1.09e-11
ASCL4	0.0293649	0.152443	-2.37611	0.00600655	0.0138012
CCDC155	0.0244004	0.125621	-2.3641	0.00399964	0.00976529
WDR87	0.00628641	0.0315216	-2.32603	0.000111017	0.000435881
TNFRSF13B	0.0606698	0.293926	-2.2764	2.34e-24	1.92e-21
TAF7L	0.0983592	0.474847	-2.27133	3.53e-08	3.63e-07
AMER3	0.00320454	0.015244	-2.25005	0.000233263	0.000833029
CD8B2	0.132451	0.619687	-2.22608	2.34e-08	2.5e-07
RTP5	0.0178249	0.0818562	-2.1992	2.25e-24	1.92e-21
DYNAP	0.157163	0.718112	-2.19195	2.11e-15	1.13e-13
COL19A1	0.0389731	0.17339	-2.15347	0.00493432	0.0116923
SMC1B	0.165778	0.718897	-2.11653	0.000300841	0.00103849
IGLL1	0.0725199	0.314123	-2.11488	1.07e-18	1.17e-16
FCRL1	0.0329086	0.142485	-2.11428	3.53e-20	6.74e-18
KEL	0.0912276	0.393777	-2.10984	2.63e-08	2.78e-07
MUCL3	0.0112727	0.0484384	-2.10332	2.45e-10	4.26e-09
TGM7	0.0345632	0.145522	-2.07393	6.4e-10	1.01e-08
WDR49	0.0605126	0.253426	-2.06626	2.67e-12	7.21e-11
MS4A1	0.196173	0.815856	-2.05619	1.17e-26	3.64e-23
CRB2	0.0648973	0.268486	-2.04862	2.98e-07	2.42e-06
RORB	0.0954378	0.390044	-2.03101	1.46e-07	1.28e-06
CNR2	0.0330573	0.130751	-1.98378	7.2e-24	4.82e-21
SPIB	0.23442	0.924744	-1.97996	2.26e-21	5.79e-19
CDC20B	0.0191977	0.0756189	-1.97781	0.00023194	0.000829255
DBX2	0.0335695	0.131442	-1.9692	8.31e-05	0.000338077
CXCR5	0.0197179	0.0767641	-1.96093	6.1e-14	2.28e-12
RHOXF1	0.0587183	0.225	-1.93804	1.74e-09	2.45e-08
IL21	0.0211761	0.0809214	-1.93408	1.67e-12	4.72e-11
CCDC60	0.0651698	0.248698	-1.93212	3.95e-09	5.12e-08
TCP11	0.141755	0.538155	-1.92462	2.06e-07	1.74e-06
HS3ST4	0.089017	0.333326	-1.90478	2.11e-08	2.27e-07
TBR1	0.00774675	0.0289332	-1.90106	2.74e-06	1.69e-05
CYP4Z1	0.0572384	0.211809	-1.88771	6.55e-12	1.6e-10
ENPP6	0.0830318	0.297545	-1.84137	5.3e-06	3.02e-05
KRT36	0.0962617	0.341612	-1.82732	0.000142696	0.000541716
FCRL2	0.0518889	0.183585	-1.82295	1.1e-17	9.52e-16
ZBBX	0.0134009	0.0471978	-1.81639	0.00102805	0.00301951
COL6A5	0.045279	0.158546	-1.80798	2.49e-15	1.31e-13
GYS2	0.0284255	0.0995128	-1.8077	7.58e-07	5.45e-06
CTSE	0.0916663	0.320043	-1.8038	2.48e-05	0.000118117
FCAMR	0.0261167	0.0899061	-1.78345	6.15e-06	3.44e-05
CD19	0.224498	0.770451	-1.779	2.03e-23	1.22e-20
TEX15	0.0475812	0.162668	-1.77347	0.00832018	0.0182157
FCER2	0.072762	0.248609	-1.77263	1.74e-14	7.52e-13
TAC3	0.0461456	0.156906	-1.76564	0.000113469	0.000444502
CYP4A22	0.00465873	0.0157258	-1.75512	1.1e-06	7.56e-06
FAM3B	0.474212	1.58839	-1.74396	4.01e-17	3.28e-15
COL9A1	0.0177368	0.0592076	-1.73903	1.09e-05	5.72e-05
MUC21	0.521256	1.73677	-1.73634	1.25e-15	7.07e-14
AICDA	0.0235758	0.0783871	-1.73331	4.67e-08	4.64e-07
KIR3DL1	0.0162645	0.0538506	-1.72724	4.45e-10	7.23e-09
BLK	0.129875	0.429123	-1.72426	1.07e-23	6.67e-21
HMX2	0.0915494	0.299499	-1.70993	2.9e-05	0.000135448
HAVCR1	0.0203285	0.066418	-1.70807	1.04e-08	1.21e-07
TMPRSS11B	0.423169	1.3796	-1.70494	1.58e-16	1.08e-14
FCRL5	0.175898	0.572134	-1.70162	1.77e-19	2.32e-17
SCML4	0.0742959	0.241437	-1.70029	1.26e-22	6.34e-20
SYCP2	0.321254	1.03572	-1.68885	1.26e-09	1.82e-08
EPS8L3	0.020168	0.065	-1.68837	0.000602508	0.00189754
KCNJ10	0.0635217	0.20446	-1.6865	2.7e-12	7.29e-11
TTC16	0.0258523	0.0828712	-1.68058	2.42e-22	1.01e-19
CASR	0.00894452	0.0286722	-1.68058	7.92e-13	2.42e-11
NPHS1	0.020164	0.0646073	-1.67991	0.000107083	0.000422884
GPHA2	0.0530266	0.169275	-1.67458	2.29e-11	5.05e-10
NUGGC	0.130527	0.413762	-1.66446	3.83e-25	3.98e-22
STAG3	0.279416	0.885713	-1.66443	3.4e-11	7.22e-10
TDGF1	0.0141857	0.0448105	-1.6594	2.77e-05	0.000130329
IL5RA	0.0303173	0.0951278	-1.64973	3.42e-15	1.71e-13
INSM1	0.0843403	0.264421	-1.64854	4.53e-09	5.73e-08
DDX25	0.019489	0.0610115	-1.64642	3.97e-12	1.03e-10
FOXD4L3	0.00537601	0.0166935	-1.63468	1.51e-07	1.32e-06
KIR3DL2	0.0317372	0.098421	-1.63279	1.04e-11	2.45e-10
RAX	0.0135169	0.0418862	-1.63171	0.0146269	0.029494
MYO3A	0.176552	0.546362	-1.62976	2.12e-05	0.000102766
MEI1	0.387141	1.19777	-1.62941	4.85e-21	1.08e-18
ADGB	0.00496702	0.0152432	-1.61771	0.0113818	0.0238475
BCL2L15	0.0711568	0.217809	-1.61399	6.73e-14	2.48e-12
CALHM1	0.0802346	0.245537	-1.61364	0.000425244	0.00140152
FAM92B	0.102859	0.314723	-1.61342	8.06e-14	2.95e-12
ART4	0.0172931	0.0527127	-1.60795	1.85e-11	4.14e-10
KLRC4-KLRK1	0.0241061	0.0734521	-1.60741	8.44e-18	7.52e-16
FXYD2	0.0721172	0.219466	-1.60558	2.49e-05	0.00011856
KIR2DL1	0.0250951	0.0756402	-1.59175	1.4e-06	9.4e-06
IL26	0.0517086	0.155556	-1.58896	4.29e-18	4.13e-16
ACSM2A	0.00339117	0.010124	-1.57793	0.0020987	0.00560287
DNAH8	0.00672468	0.0200697	-1.57748	6.01e-14	2.26e-12
CEACAM16	0.0606521	0.179988	-1.56927	3.26e-07	2.61e-06
LDLRAD1	0.0950605	0.281921	-1.56837	3.74e-10	6.25e-09
SFTA2	0.185594	0.549885	-1.56698	3.67e-12	9.57e-11
CYP2E1	0.198724	0.588216	-1.56558	8.58e-13	2.6e-11
ADARB2	0.104439	0.307812	-1.55939	1.04e-08	1.21e-07
ZNF831	0.107936	0.317381	-1.55604	3.61e-22	1.34e-19
CNDP1	0.0122402	0.0359754	-1.55539	3.19e-05	0.000147142
KLRC4	0.0344641	0.101016	-1.55141	6.08e-13	1.9e-11
KRT24	0.788811	2.30735	-1.54849	8.8e-17	6.51e-15
CCL25	0.0645121	0.188617	-1.54782	2.5e-14	1.03e-12
AIRE	0.0217245	0.063328	-1.54352	0.000993046	0.00293313
C4orf50	0.012542	0.0365529	-1.54321	3.15e-19	4e-17
ZNF80	0.0326809	0.0950036	-1.53954	7.05e-14	2.6e-12
ABCD2	0.0756186	0.219805	-1.53941	4.63e-22	1.64e-19
PNOC	0.195145	0.567121	-1.53911	1.03e-19	1.48e-17
NEFH	0.295693	0.857463	-1.53597	4.9e-06	2.82e-05
KIR2DL3	0.0199465	0.0577603	-1.53394	2.35e-11	5.15e-10
PLA2G2D	0.325896	0.943308	-1.53332	2.19e-15	1.17e-13
SLC4A10	0.0103524	0.0299447	-1.53233	2.26e-07	1.9e-06
C8orf74	0.0215277	0.0614229	-1.51258	1.12e-10	2.11e-09
OR52N4	0.025982	0.0738925	-1.50792	1.19e-09	1.73e-08
GPR31	0.0241654	0.0686858	-1.50707	1.03e-12	3.06e-11
KRT40	0.0411412	0.116718	-1.50438	5.23e-06	2.98e-05
CD40LG	0.168598	0.478138	-1.50384	7.79e-22	2.53e-19
TNFRSF17	0.4226	1.19826	-1.50358	1.21e-21	3.64e-19
FUT6	0.498854	1.40604	-1.49494	1.25e-21	3.68e-19
GFI1B	0.0202455	0.056713	-1.48608	6.93e-07	5.05e-06
DBH	0.0638773	0.178653	-1.48378	1.03e-16	7.38e-15
SIGLEC11	0.0807949	0.224294	-1.47306	4.46e-08	4.46e-07
RANBP17	0.0923064	0.255759	-1.47028	0.000219904	0.000790571
TRH	0.0207095	0.057321	-1.46877	0.00305313	0.00774151
PLEKHG7	0.0502892	0.138668	-1.46331	1.32e-12	3.81e-11
TLR10	0.181633	0.499691	-1.46001	1.99e-22	9.04e-20
CNTN2	0.021665	0.0594748	-1.45691	0.00299345	0.0076075
SLC18A1	0.0125671	0.0344972	-1.45683	7.22e-09	8.71e-08
IL2	0.0146093	0.0400921	-1.45643	1.05e-09	1.56e-08
TLX3	0.263298	0.71973	-1.45076	2.16e-06	1.36e-05
GOLGA6L22	0.00944053	0.0257072	-1.44523	0.0229821	0.0432708
KLRK1	0.0681509	0.185107	-1.44155	7.81e-20	1.15e-17
TTC24	0.0716072	0.193852	-1.43678	2.27e-22	9.84e-20
AC136428.1	0.351015	0.947344	-1.43235	8.56e-12	2.04e-10
MUC13	0.123142	0.332196	-1.43171	0.000120643	0.000469072
HSF5	0.011723	0.0315108	-1.42651	1.69e-10	3.07e-09
ARSF	0.0744291	0.199397	-1.42171	7.96e-08	7.48e-07
CXorf65	0.114342	0.305291	-1.41684	3.82e-20	7.08e-18
CTNNA2	0.00828869	0.0221266	-1.41656	0.00505395	0.0119287
C11orf21	0.119328	0.318388	-1.41585	2.84e-22	1.14e-19
LCN12	0.0811528	0.2159	-1.41165	5.45e-10	8.68e-09
TRAT1	0.222702	0.591736	-1.40984	3.02e-21	7.24e-19
TDRD10	0.160844	0.427255	-1.40943	5.59e-10	8.88e-09
GPR25	0.197976	0.525804	-1.4092	2.07e-17	1.76e-15
SPATA21	0.0410171	0.108791	-1.40726	0.000767823	0.00234389
KCNA3	0.200265	0.530103	-1.40436	3.3e-15	1.66e-13
NKX6-3	0.0352545	0.0930739	-1.40057	2.48e-06	1.55e-05
FCRL3	0.149248	0.393604	-1.39903	1.97e-16	1.31e-14
IDO2	0.0397745	0.104888	-1.39894	5.69e-19	6.78e-17
RBP3	0.0131974	0.0347355	-1.39616	0.00226001	0.00597826
NKX2-3	0.220576	0.579239	-1.39288	1.63e-06	1.08e-05
CROCC2	0.0147944	0.0387566	-1.38939	4.55e-05	0.000201039
ANKRD34B	0.0860092	0.225158	-1.38837	7.41e-05	0.000307143
TCL1A	0.216071	0.561581	-1.37799	4.3e-12	1.1e-10
HTR3B	0.0293784	0.0760861	-1.37288	9.6e-10	1.44e-08
SLFN14	0.010873	0.0281137	-1.37052	2.42e-12	6.61e-11
TDRD1	0.0979721	0.253254	-1.37014	0.0201182	0.0386434
ERICH3	0.0175535	0.045277	-1.36702	0.000501865	0.00161949
LMAN1L	0.0152471	0.0393045	-1.36616	3.59e-07	2.85e-06
DRC7	0.0162336	0.0418186	-1.36517	9.31e-05	0.00037245
IL22	0.0271409	0.0696597	-1.35986	9.88e-06	5.24e-05
HTR4	0.00397452	0.0101623	-1.35437	3.34e-07	2.67e-06
MYOC	0.0526239	0.134513	-1.35396	0.00356503	0.00884961
ZNF648	0.0112115	0.0285892	-1.35049	1.46e-05	7.43e-05
SPAG6	0.0448714	0.114221	-1.34796	2.52e-05	0.000119915
CYP4A11	0.00871657	0.0221765	-1.3472	3.78e-06	2.24e-05
ZMAT1	0.153302	0.388717	-1.34235	1.69e-14	7.31e-13
REN	0.0802872	0.20327	-1.34016	1.95e-06	1.26e-05
FAM163B	0.0601927	0.152126	-1.33761	2.4e-07	2e-06
CYP2F1	0.058668	0.148252	-1.33741	1.54e-05	7.79e-05
GPR174	0.22989	0.578842	-1.33223	1.72e-15	9.46e-14
OCA2	0.229042	0.576609	-1.33198	2.25e-10	3.94e-09
LHFPL4	0.0591926	0.148519	-1.32716	2.18e-06	1.37e-05
WNT1	0.0290884	0.0729571	-1.3266	1.97e-15	1.06e-13
ODF4	0.0219075	0.0548955	-1.32526	1.3e-07	1.16e-06
BTLA	0.144206	0.361222	-1.32475	6.69e-17	5.06e-15
CYP4F12	0.352436	0.879427	-1.3192	6.56e-16	3.92e-14
STAP1	0.240504	0.598804	-1.31602	1.96e-21	5.18e-19
MUC4	0.591429	1.4718	-1.31531	1.29e-14	5.71e-13
CLNK	0.0622669	0.154917	-1.31496	1.69e-22	7.99e-20
KLRC3	0.0222318	0.055193	-1.31186	6.89e-11	1.37e-09
TIMD4	0.0942754	0.233923	-1.31108	2.14e-09	2.95e-08
HMSD	0.234827	0.582123	-1.30973	7.29e-12	1.77e-10
CEACAM7	0.585454	1.44566	-1.3041	1.25e-16	8.89e-15
NOS2	0.366253	0.902839	-1.30163	1.07e-07	9.7e-07
GPR18	0.195169	0.480843	-1.30084	4.63e-21	1.06e-18
CR1L	0.0466393	0.114788	-1.29935	1.24e-07	1.11e-06
FYB2	0.0264368	0.0650402	-1.29878	0.00469653	0.0112037
PFN3	0.0226729	0.0557534	-1.29809	5.23e-08	5.13e-07
C1orf146	0.0297936	0.0732465	-1.29776	4.12e-07	3.21e-06
LY9	0.175529	0.430403	-1.29398	5.54e-20	9.09e-18
NPPC	0.325684	0.79784	-1.29263	1.19e-05	6.2e-05
BFSP2	0.0526416	0.128813	-1.29101	1.85e-16	1.24e-14
PTX4	0.155698	0.380115	-1.28768	2.95e-05	0.000137272
IL12B	0.0577664	0.140661	-1.28392	8.47e-14	3.06e-12
C1orf194	0.0543555	0.131946	-1.27945	0.00795129	0.0175137
FASLG	0.357877	0.867451	-1.27732	5.7e-22	1.98e-19
AL583836.1	0.0097625	0.0236427	-1.27608	1.3e-05	6.72e-05
ARHGEF33	0.0759127	0.183603	-1.27418	2.37e-05	0.000113352
DNAH12	0.0121211	0.0292147	-1.26918	0.0033552	0.00839284
DSCAML1	0.0390007	0.0939806	-1.26886	8.83e-08	8.2e-07
DPEP3	0.0445572	0.107317	-1.26814	0.0194973	0.0376829
ENPP7	0.0146448	0.0352677	-1.26796	6.67e-08	6.39e-07
WNK3	0.0896604	0.215866	-1.2676	0.000154462	0.000579908
TIFAB	0.130469	0.313891	-1.26655	5.29e-20	8.78e-18
TMPRSS2	0.625081	1.50291	-1.26565	1.02e-14	4.61e-13
DKK4	0.175895	0.42289	-1.26557	6.49e-10	1.02e-08
JAKMIP1	0.210828	0.506447	-1.26435	4.69e-21	1.06e-18
GH1	0.011326	0.0271516	-1.26139	2.12e-08	2.28e-07
CYP2C9	0.100736	0.241302	-1.26026	2.49e-12	6.77e-11
SCGB2A1	0.164516	0.393057	-1.25651	0.000150094	0.000565591
TSPAN32	0.146861	0.350505	-1.25498	1.53e-20	3.18e-18
MAATS1	0.0590419	0.140771	-1.25353	1.81e-06	1.18e-05
MS4A8	0.0567397	0.134761	-1.24797	0.000460178	0.00150205
ACSL6	0.0382436	0.0906178	-1.24458	3.41e-10	5.75e-09
TMEM178B	0.298363	0.706595	-1.24382	3.23e-05	0.000148949
AC119396.1	0.0958164	0.226658	-1.24217	6.14e-12	1.51e-10
SSTR3	0.0650511	0.153761	-1.24105	2.9e-15	1.49e-13
KLHDC7A	0.0608107	0.143567	-1.23933	1.04e-11	2.45e-10
UBASH3A	0.355049	0.837592	-1.23823	7.44e-25	7.25e-22
IL17A	0.0496873	0.117045	-1.23611	1.13e-09	1.66e-08
LAX1	0.429303	1.00842	-1.23203	1.02e-18	1.13e-16
ADAM29	0.0029007	0.00679301	-1.22765	3.19e-06	1.93e-05
TTC6	0.0441604	0.1034	-1.22741	5.26e-07	3.98e-06
CR2	0.134705	0.315081	-1.22591	4.62e-11	9.57e-10
IGFALS	0.0606132	0.141768	-1.22582	3.54e-06	2.11e-05
SAMD3	0.0816925	0.190913	-1.22464	3.75e-15	1.84e-13
B3GALT5	0.161897	0.378344	-1.22463	0.000159699	0.000597254
SLC5A8	0.0464355	0.108364	-1.22258	4.52e-05	0.000200061
CAPN14	0.594936	1.38547	-1.21957	2.91e-11	6.27e-10
KLRC2	0.107213	0.249428	-1.21815	4.55e-10	7.36e-09
SLC26A9	0.531781	1.23697	-1.21791	1.46e-17	1.25e-15
KLB	0.0536478	0.124521	-1.21479	1.14e-15	6.47e-14
C1QTNF4	0.102508	0.237845	-1.21428	0.000154314	0.000579617
ARRDC5	0.079061	0.183389	-1.21387	1.07e-19	1.52e-17
RSPO1	0.123017	0.284956	-1.21189	1.83e-15	9.95e-14
NR1H4	0.00570663	0.013217	-1.21169	6.58e-05	0.00027816
NCR3	0.230365	0.53245	-1.20872	1.56e-21	4.28e-19
ADGRG5	0.317299	0.732842	-1.20766	2.54e-24	1.98e-21
CLEC4C	0.0671527	0.154976	-1.20653	1.79e-08	1.96e-07
FCRL6	0.145164	0.334647	-1.20496	1.23e-13	4.32e-12
YBX2	0.362837	0.836145	-1.20443	1.05e-05	5.53e-05
GRIN2C	0.103447	0.238269	-1.2037	4.84e-06	2.79e-05
MROH2A	0.223861	0.513849	-1.19874	0.0012269	0.00352458
ZYG11A	0.281603	0.645446	-1.19664	4.66e-08	4.64e-07
RGS13	0.0397683	0.0910503	-1.19505	2.21e-11	4.9e-10
MIOX	0.184891	0.422383	-1.19188	1.81e-07	1.55e-06
DMRTA2	0.389596	0.889995	-1.19182	6.59e-05	0.00027839
FKBP6	0.0282887	0.0645965	-1.19123	5.02e-05	0.000219467
HCAR1	0.103303	0.235829	-1.19086	0.000664997	0.00206639
MSLNL	0.0584462	0.133264	-1.1891	8.01e-06	4.34e-05
MUC17	0.00680052	0.0154577	-1.18461	7.22e-05	0.00030032
THEMIS	0.24326	0.552812	-1.18429	1.07e-17	9.36e-16
CFAP73	0.134999	0.306324	-1.18211	3.89e-21	9.09e-19
MAP3K19	0.0228933	0.051855	-1.17956	0.000320552	0.00109584
GPR55	0.159922	0.36182	-1.17791	2.4e-21	6.03e-19
CYP4B1	0.528765	1.19301	-1.1739	1.31e-15	7.34e-14
IL9R	0.17979	0.405624	-1.17383	3.78e-18	3.73e-16
HEPACAM2	0.0356499	0.0801537	-1.16887	3.68e-05	0.000166932
SLC9A4	0.127644	0.285931	-1.16354	3.2e-05	0.000147467
IKZF3	0.683639	1.53105	-1.16321	8.8e-26	1.52e-22
BTNL9	0.354199	0.793209	-1.16314	2.96e-07	2.4e-06
TMEM272	0.00603464	0.0135098	-1.16267	1.25e-07	1.12e-06
PLAC8	0.835252	1.86102	-1.15581	4.57e-17	3.62e-15
GZMK	0.717356	1.59779	-1.15532	6.77e-20	1.03e-17
BCL2L14	0.207389	0.461244	-1.15319	5.67e-14	2.15e-12
SMIM6	0.0640875	0.142246	-1.15027	1.1e-10	2.07e-09
IFNG	0.341311	0.757519	-1.15019	5.5e-14	2.09e-12
RAB37	0.249394	0.552657	-1.14796	9.54e-27	3.64e-23
GTSF1L	0.0710321	0.157298	-1.14696	9.85e-16	5.67e-14
CD22	0.253915	0.561456	-1.14483	2.8e-13	9.36e-12
CRTAM	0.294903	0.650756	-1.14188	3.2e-17	2.64e-15
DEFB124	0.0794404	0.175136	-1.14053	0.0200471	0.0385496
HNF1A	0.029672	0.0653122	-1.13825	0.000967095	0.0028637
GPR15	0.442273	0.973495	-1.13824	8.47e-12	2.03e-10
SULT1B1	0.176621	0.388352	-1.13671	4.92e-09	6.15e-08
TBX21	0.299132	0.657323	-1.13582	7.01e-19	8.15e-17
CYP21A2	0.0232835	0.0511606	-1.13573	4.47e-07	3.45e-06
B3GNT6	0.158464	0.347183	-1.13154	6.24e-08	6.02e-07
LYPD4	0.0259859	0.0569296	-1.13145	0.000142443	0.000540889
CA4	0.0375359	0.0820418	-1.12809	0.000290655	0.00100799
NEXMIF	0.0684141	0.149301	-1.12586	0.000214178	0.000771762
TGM6	0.130253	0.283773	-1.12342	5.03e-06	2.88e-05
B3GAT1	0.040938	0.0891466	-1.12274	1.67e-16	1.13e-14
KLHL14	0.0360745	0.0785213	-1.1221	4.83e-10	7.75e-09
AQP2	0.0112506	0.0244763	-1.12138	0.000866706	0.00260697
ATP13A5	0.238892	0.519083	-1.11961	0.000169978	0.000631606
SHISA8	0.121438	0.263868	-1.1196	3.48e-09	4.55e-08
ZNF683	0.477268	1.03685	-1.11934	1.49e-16	1.03e-14
LILRA4	0.263251	0.571841	-1.11918	1.95e-12	5.45e-11
PARP15	0.211081	0.458162	-1.11806	5.35e-19	6.47e-17
C8G	0.441747	0.958246	-1.11718	5.18e-14	1.99e-12
ALX3	0.0783114	0.16985	-1.11697	0.0106419	0.022515
SYT2	0.0530772	0.115105	-1.11679	0.000187312	0.00068688
CHDH	0.271223	0.588045	-1.11645	2.48e-10	4.3e-09
MUC19	0.00423704	0.00918624	-1.11642	1.37e-05	7.03e-05
FLT3	0.155629	0.336522	-1.11259	9.82e-17	7.09e-15
CRNN	1.73735	3.75265	-1.11102	1.09e-10	2.06e-09
ATP2B2	0.0459846	0.0993159	-1.11087	0.0103129	0.0219259
IL19	0.173661	0.374872	-1.11012	2.12e-08	2.28e-07
NCR1	0.115996	0.250327	-1.10974	1.88e-13	6.43e-12
PKHD1L1	0.0222443	0.0479918	-1.10935	5.03e-14	1.95e-12
IL36A	1.07743	2.32332	-1.10859	8.81e-13	2.65e-11
HLF	0.605785	1.30607	-1.10835	9.59e-19	1.07e-16
TRPV5	0.0104672	0.0225517	-1.10736	2.16e-05	0.000104574
C11orf16	0.133803	0.288219	-1.10705	0.00023935	0.000851565
CLEC9A	0.115336	0.248352	-1.10654	6.89e-15	3.21e-13
HEATR9	0.0273674	0.0588491	-1.10456	3.64e-10	6.1e-09
RAD9B	0.163216	0.350771	-1.10375	2.78e-11	6.04e-10
PLGLB1	0.0196129	0.0421237	-1.10283	1.92e-12	5.36e-11
CYP2C19	0.0107006	0.0229703	-1.10208	3.39e-09	4.45e-08
SYNGR3	0.566362	1.21523	-1.10143	7.69e-13	2.36e-11
ATP13A4	0.550769	1.18169	-1.10133	2.46e-14	1.02e-12
TRIM40	0.020834	0.0446175	-1.09867	2.61e-05	0.000123518
DUOXA2	0.745452	1.59633	-1.09857	6.81e-18	6.1e-16
COL4A4	0.246199	0.527178	-1.09846	5.42e-07	4.09e-06
ENPP3	0.0692146	0.148067	-1.0971	1.29e-11	2.97e-10
C19orf67	0.0166827	0.0356785	-1.0967	1.99e-08	2.16e-07
KLRB1	0.59771	1.27814	-1.09653	1.01e-26	3.64e-23
CD8B	0.629894	1.34672	-1.09626	4.36e-20	7.55e-18
GZMM	0.723218	1.54587	-1.09591	1.75e-25	2.27e-22
IL17F	0.0350393	0.0748179	-1.09441	6.76e-09	8.23e-08
KIF25	0.067368	0.143777	-1.0937	4.58e-06	2.66e-05
FOXJ1	0.372653	0.795223	-1.09353	1.67e-06	1.1e-05
MSGN1	0.138409	0.295336	-1.09342	4.82e-06	2.78e-05
ZAP70	0.654787	1.39661	-1.09283	2.99e-28	2.33e-24
TJP3	0.742355	1.58176	-1.09135	5.84e-19	6.9e-17
SH2D1A	0.520548	1.10907	-1.09125	4.83e-20	8.28e-18
ISL1	0.20512	0.437019	-1.09123	0.00431268	0.0104284
FOXD3	0.24208	0.515254	-1.0898	9.02e-07	6.36e-06
GRAP2	0.322977	0.687046	-1.08898	2.46e-22	1.01e-19
MUC22	0.0686323	0.145841	-1.08744	1.78e-09	2.49e-08
SLC1A2	0.0714245	0.151601	-1.08579	0.0047257	0.0112544
ZAR1L	0.0141275	0.0299592	-1.08449	2.81e-05	0.000131628
KRT72	0.0438053	0.0928839	-1.08432	0.000296375	0.00102531
GAL3ST2	0.150639	0.317979	-1.07783	0.00113923	0.00329824
AC131097.2	0.138829	0.292824	-1.07673	4.97e-09	6.21e-08
CARMIL2	0.31258	0.657895	-1.07363	2.26e-24	1.92e-21
RIIAD1	0.0224327	0.0471977	-1.07311	0.00715536	0.0160053
COL6A6	0.128217	0.269676	-1.07264	1.27e-07	1.13e-06
MYB	0.448471	0.94325	-1.07263	3.86e-13	1.25e-11
RNF224	0.185002	0.388513	-1.07042	1.32e-16	9.3e-15
ADH4	0.0226079	0.0474458	-1.06946	0.00362053	0.00896739
GPR171	0.472839	0.99159	-1.06839	9.83e-20	1.43e-17
HAO2	0.0288309	0.0604612	-1.06839	2.3e-11	5.05e-10
MGAM2	0.0238659	0.0500313	-1.06788	0.00209705	0.00559944
PYHIN1	0.312174	0.653914	-1.06675	2.73e-18	2.82e-16
CLECL1	0.176411	0.369365	-1.06611	2.79e-15	1.44e-13
RUFY4	0.200039	0.418795	-1.06596	3.01e-13	1e-11
TBL1Y	0.0862624	0.180589	-1.0659	0.00796639	0.017542
CCDC160	0.0759649	0.158747	-1.06332	1.38e-06	9.25e-06
CD79A	1.44025	3.00942	-1.06317	3.58e-22	1.34e-19
SYCP3	0.026223	0.0547874	-1.06301	1.58e-09	2.24e-08
SP5	0.215663	0.450351	-1.06227	7.73e-05	0.000318602
SPACA4	0.221745	0.462768	-1.06139	2.61e-18	2.71e-16
SH2D1B	0.168808	0.35181	-1.05941	2.28e-12	6.22e-11
ADH1C	0.42809	0.889638	-1.0553	7.07e-06	3.89e-05
FAM187B	0.0153696	0.0319065	-1.05377	0.00170519	0.0046805
FUT7	0.341403	0.708683	-1.05366	6.41e-21	1.39e-18
SLC12A3	0.0359591	0.0746348	-1.05349	5.14e-15	2.43e-13
XCR1	0.278119	0.576317	-1.05116	4.11e-20	7.37e-18
SLAMF6	0.711417	1.46838	-1.04546	4.49e-22	1.63e-19
DIO1	0.05207	0.107474	-1.04546	4.03e-08	4.07e-07
EXOC3L4	0.454605	0.937699	-1.04451	2.66e-12	7.21e-11
BMP3	0.123254	0.25419	-1.04427	3.89e-05	0.000175315
A3GALT2	0.0424255	0.0873256	-1.04147	0.000287096	0.000998754
ITIH1	0.0202998	0.0416803	-1.0379	1.93e-10	3.44e-09
SCN11A	0.0181879	0.0373176	-1.03688	1.06e-06	7.32e-06
POU2AF1	0.75973	1.55728	-1.03547	2.91e-16	1.88e-14
CD226	0.128529	0.263266	-1.03443	2.8e-17	2.33e-15
SPNS3	0.174042	0.356402	-1.03407	3.56e-25	3.97e-22
VWA3A	0.0245825	0.0503264	-1.03368	0.0136027	0.0277516
IRF4	0.621512	1.27213	-1.0334	6.22e-20	9.7e-18
PRICKLE4	0.114951	0.235096	-1.03223	5.22e-14	2.01e-12
MAL	1.74416	3.56586	-1.03171	1.38e-18	1.47e-16
AMY2B	0.147757	0.302023	-1.03143	1.05e-15	6.03e-14
CLEC6A	0.0741894	0.151626	-1.03123	1.45e-07	1.27e-06
DRD1	0.0567956	0.116062	-1.03104	0.0106065	0.0224553
CCR6	0.0391925	0.0797997	-1.02581	7.11e-09	8.59e-08
MROH7	0.0512195	0.104286	-1.02578	4.6e-08	4.58e-07
FOXI2	0.0594649	0.121063	-1.02565	0.0118166	0.0246261
TMPRSS11A	1.4034	2.85652	-1.02533	4.26e-17	3.44e-15
MUC16	0.23889	0.485856	-1.02418	7.95e-09	9.5e-08
SYCE2	0.339134	0.689507	-1.02371	2.89e-05	0.000135133
TPTE2	0.0342755	0.0695816	-1.02153	1.74e-10	3.15e-09
SSTR5	0.209937	0.42614	-1.02138	0.00310875	0.0078621
PRKCG	0.0596285	0.120898	-1.01971	1.24e-05	6.43e-05
NTSR2	0.0232373	0.0470904	-1.01899	0.0156478	0.0311856
FCRLA	0.330134	0.668753	-1.01842	5.03e-11	1.03e-09
CXCR3	0.85303	1.72672	-1.01737	7.33e-22	2.43e-19
TMEFF2	0.0160271	0.0323742	-1.01433	0.0253492	0.0470796
CLDN10	0.377653	0.762043	-1.01281	8.72e-06	4.67e-05
REELD1	0.0635063	0.128139	-1.01274	3.48e-06	2.08e-05
CCDC194	0.100539	0.20281	-1.01237	1.94e-10	3.45e-09
MGAT3	0.568571	1.14651	-1.01183	1.82e-10	3.26e-09
KLRG1	0.176135	0.354922	-1.01082	4.32e-14	1.7e-12
ADGRF1	0.509351	1.02615	-1.01051	5.7e-14	2.15e-12
WDR38	0.113842	0.229026	-1.00848	0.00168103	0.00463047
MC4R	0.0238342	0.0479391	-1.00817	0.000528102	0.0016926
SLAMF1	0.441104	0.886188	-1.00649	1.75e-21	4.72e-19
CCR2	0.364905	0.733058	-1.00641	1.95e-13	6.63e-12
CACNA1D	0.0697405	0.139988	-1.00524	6.65e-06	3.69e-05
ITK	0.381506	0.765648	-1.00497	1.2e-16	8.54e-15
EOMES	0.378043	0.758558	-1.00471	3.81e-15	1.87e-13
LTA	0.341448	0.683504	-1.00128	2.46e-17	2.06e-15
SOX11	0.432601	0.2147	1.01071	4.19e-16	2.61e-14
SYT13	0.326414	0.161559	1.01464	6.46e-06	3.6e-05
PAPPA2	0.129597	0.0639514	1.01899	1.54e-09	2.18e-08
KLHL4	0.288882	0.141212	1.03262	3.19e-07	2.56e-06
SPANXB1	0.670053	0.326049	1.03919	4.35e-06	2.54e-05
KRTAP19-1	0.339325	0.164475	1.04481	0.00211547	0.0056438
PSG5	0.167201	0.080791	1.04932	1.75e-07	1.51e-06
KANK4	1.10441	0.532327	1.0529	1.07e-14	4.78e-13
WT1	0.124932	0.0599963	1.0582	3.19e-05	0.000147285
METTL11B	0.291586	0.138895	1.06993	6.49e-14	2.42e-12
AFP	0.0635471	0.0299728	1.08417	6.2e-06	3.46e-05
CDH2	0.998433	0.466477	1.09786	1.07e-13	3.81e-12
C11orf87	0.280368	0.127967	1.13155	3.38e-07	2.69e-06
SYT16	0.0844589	0.0376542	1.16544	9.83e-08	9.05e-07
ZP1	0.150488	0.0669828	1.16779	4.69e-09	5.89e-08
PSG6	0.0478427	0.0211925	1.17475	0.012585	0.0259915
NETO1	0.164958	0.0726203	1.18365	6.03e-05	0.00025743
ROS1	0.538726	0.231368	1.21936	1.22e-10	2.28e-09
CSMD3	0.0507446	0.0217321	1.22343	6.38e-05	0.000270894
GRIK2	0.143248	0.0605806	1.24159	7.67e-07	5.51e-06
HHIP	0.140241	0.0569843	1.29927	0.0025804	0.00670078
PSG9	0.0373794	0.0148072	1.33595	6.69e-06	3.71e-05
GRIA1	0.0692644	0.026164	1.40453	0.00884338	0.0192021
FGF5	0.194197	0.0691867	1.48895	1.48e-10	2.72e-09
RXFP1	0.174655	0.060281	1.53473	7.58e-05	0.00031321
MDGA2	0.0379997	0.00823983	2.2053	0.00229882	0.00606963

## Sheet: Supplementary Table 6
List of stromal score, immune score, estimate score and tumor purity in the indicated groups
Sample	StromalScore	ImmuneScore	ESTIMATEScore	TumorPurity	group
TCGA-H7-7774-01A	-912.449	953.942	41.4934	0.81903	low_risk
TCGA-CV-6943-01A	1263.21	2473.62	3736.82	0.405281	low_risk
TCGA-CN-5374-01A	-845.117	1702.33	857.213	0.74463	low_risk
TCGA-F7-A61V-01A	-1057.5	203.301	-854.196	0.887179	low_risk
TCGA-CR-5249-01A	-407.375	1918.46	1511.09	0.677236	low_risk
TCGA-CQ-5331-01A	43.2931	1911.52	1954.81	0.62791	low_risk
TCGA-CV-A45W-01A	27.6472	1683.32	1710.97	0.65536	low_risk
TCGA-CQ-7063-01A	-353.882	1878.88	1525	0.675731	low_risk
TCGA-CV-A45T-01A	47.1455	2305.24	2352.39	0.581447	low_risk
TCGA-CV-5444-01A	1230.85	1640.97	2871.82	0.517785	low_risk
TCGA-CR-5250-01A	-392.681	1097.23	704.545	0.7594	low_risk
TCGA-CN-4729-01A	-124.217	656.633	532.416	0.775595	low_risk
TCGA-CV-7089-01A	-887.644	700.398	-187.246	0.837829	low_risk
TCGA-QK-A652-01A	-165.137	1168.61	1003.48	0.730129	low_risk
TCGA-H7-A6C4-01A	-327.907	917.787	589.88	0.770243	low_risk
TCGA-KU-A66S-01A	-821.103	30.869	-790.234	0.882808	low_risk
TCGA-QK-A6VC-01A	-186.46	1535.27	1348.81	0.694568	low_risk
TCGA-CN-4727-01A	-630.168	-158.902	-789.07	0.882727	low_risk
TCGA-CV-7263-01A	429.857	1105.7	1535.56	0.674589	low_risk
TCGA-H7-A76A-01A	715.404	2703.94	3419.34	0.44743	low_risk
TCGA-CN-4723-01A	-51.6587	951.97	900.311	0.740392	low_risk
TCGA-CQ-5325-01A	850.575	2440.04	3290.62	0.464248	low_risk
TCGA-CX-A4AQ-01A	-196.136	2029.6	1833.47	0.641673	low_risk
TCGA-CV-7410-01A	530.032	2642.29	3172.32	0.479556	low_risk
TCGA-BB-4225-01A	-744.506	1683.45	938.942	0.736569	low_risk
TCGA-D6-A6EM-01A	-207.764	1878.25	1670.49	0.659836	low_risk
TCGA-T2-A6WZ-01A	-586.439	796.185	209.746	0.804612	low_risk
TCGA-HD-8314-01A	82.8867	1148.72	1231.61	0.706841	low_risk
TCGA-DQ-7591-01A	-1070.79	1696.25	625.463	0.766901	low_risk
TCGA-CN-4739-01A	-455.369	1257.12	801.751	0.750039	low_risk
TCGA-CR-7398-01A	5.21029	402.044	407.254	0.78706	low_risk
TCGA-HD-8634-01A	-920.562	448.696	-471.866	0.8599	low_risk
TCGA-HD-8224-01A	97.0607	386.813	483.874	0.780073	low_risk
TCGA-CV-A45P-01A	-1044.47	198.97	-845.5	0.886589	low_risk
TCGA-QK-AA3J-01A	-1506.92	283.694	-1223.22	0.91086	low_risk
TCGA-BA-4077-01B	-416.936	1527.9	1110.97	0.719257	low_risk
TCGA-F7-7848-01A	-70.5215	1129.87	1059.35	0.7245	low_risk
TCGA-CR-7392-01A	1008.17	1903.02	2911.19	0.512832	low_risk
TCGA-CR-6471-01A	259.776	1569.13	1828.9	0.642186	low_risk
TCGA-UF-A7JT-01A	257.471	2110.28	2367.75	0.579611	low_risk
TCGA-QK-A6IF-01A	-621.252	2174.56	1553.3	0.672663	low_risk
TCGA-QK-A6IJ-01A	-919.931	1354.85	434.92	0.784549	low_risk
TCGA-CV-7248-01A	-95.0469	1056.33	961.284	0.734347	low_risk
TCGA-RS-A6TP-01A	-1640.19	426.379	-1213.81	0.910289	low_risk
TCGA-CV-7101-01A	-193.304	1145.48	952.18	0.735253	low_risk
TCGA-CN-5360-01A	402.299	1899.73	2302.03	0.587445	low_risk
TCGA-CV-A6JY-01A	-1173.33	-54.4195	-1227.75	0.911134	low_risk
TCGA-BA-5153-01A	-553.45	1599.67	1046.22	0.725827	low_risk
TCGA-CR-7369-01A	-168.734	666.689	497.954	0.778778	low_risk
TCGA-BA-A6DB-01A	361.426	2040.87	2402.3	0.575471	low_risk
TCGA-CQ-5327-01A	-140.798	1735.41	1594.61	0.668164	low_risk
TCGA-BA-A4IF-01A	-1191.49	-291.7	-1483.19	0.925943	low_risk
TCGA-D6-A4Z9-01A	-511.16	603.438	92.2781	0.81473	low_risk
TCGA-CX-7085-01A	1426.31	2406.84	3833.15	0.392315	low_risk
TCGA-F7-A50J-01A	-482.967	879.585	396.618	0.788022	low_risk
TCGA-CQ-6222-01A	126.483	1997.92	2124.41	0.608343	low_risk
TCGA-D6-6825-01A	391.164	1928	2319.16	0.585408	low_risk
TCGA-CN-6013-01A	45.2831	2220.58	2265.86	0.591733	low_risk
TCGA-CV-6939-01A	-105.922	1319.81	1213.89	0.708679	low_risk
TCGA-CR-6477-01A	609.266	1482.08	2091.34	0.612188	low_risk
TCGA-CN-5358-01A	1735.29	2525.67	4260.96	0.333816	low_risk
TCGA-CR-7397-01A	1181.14	1075.96	2257.1	0.59277	low_risk
TCGA-CR-7376-01A	1948.77	2684.45	4633.22	0.281834	low_risk
TCGA-BA-5558-01A	-22.5154	1406.98	1384.46	0.690794	low_risk
TCGA-CR-7395-01A	476.142	2027.22	2503.36	0.563276	low_risk
TCGA-D6-A6EQ-01A	96.6278	1360.77	1457.4	0.683013	low_risk
TCGA-CN-4722-01A	336.054	475.817	811.871	0.749056	low_risk
TCGA-CV-A45U-01A	-961.747	314.055	-647.692	0.872787	low_risk
TCGA-CV-A6JN-01A	-735.992	1186.22	450.23	0.783153	low_risk
TCGA-CR-5248-01A	-318.188	2662.12	2343.93	0.582456	low_risk
TCGA-CR-6491-01A	-682.671	328.208	-354.463	0.850976	low_risk
TCGA-CV-7242-01A	-969.196	1331.32	362.119	0.79113	low_risk
TCGA-CV-A45R-01A	94.1303	972.008	1066.14	0.723813	low_risk
TCGA-BB-4223-01A	-678.724	1524.12	845.399	0.745786	low_risk
TCGA-CV-A468-01A	767.395	2038.71	2806.11	0.526012	low_risk
TCGA-D6-6516-01A	-354.51	1101.78	747.27	0.755305	low_risk
TCGA-CN-A497-01A	-371.002	622.287	251.285	0.800976	low_risk
TCGA-P3-A5QE-01A	-1295.11	1791.53	496.422	0.778919	low_risk
TCGA-CV-5443-01A	-62.8983	1876.63	1813.73	0.643892	low_risk
TCGA-CR-7377-01A	885.792	1968.04	2853.83	0.520042	low_risk
TCGA-F7-A50G-01A	-271.834	1406.09	1134.26	0.716877	low_risk
TCGA-HL-7533-01A	-779.195	1151.06	371.868	0.790254	low_risk
TCGA-T2-A6X2-01A	-161.543	1088.74	927.199	0.737734	low_risk
TCGA-CV-5431-01A	592.889	1965.26	2558.15	0.556613	low_risk
TCGA-CN-6021-01A	-542.061	528.528	-13.5335	0.823638	low_risk
TCGA-BA-A6DJ-01A	-497.97	1316.33	818.356	0.748425	low_risk
TCGA-CN-5355-01A	385.44	466.583	852.023	0.745138	low_risk
TCGA-D6-6826-01A	626.859	1674.33	2301.19	0.587545	low_risk
TCGA-UF-A7JJ-01A	943.442	2001.51	2944.96	0.508571	low_risk
TCGA-CR-6488-01A	632.687	1505.97	2138.65	0.606682	low_risk
TCGA-HD-A633-01A	-699.226	256.311	-442.915	0.857723	low_risk
TCGA-CR-7364-01A	-420.995	590.634	169.639	0.808093	low_risk
TCGA-CQ-5323-01A	-662.376	722.051	59.6749	0.817496	low_risk
TCGA-CQ-5333-01A	206.72	2351.6	2558.32	0.556592	low_risk
TCGA-UF-A71D-01A	-1194.2	23.6088	-1170.59	0.907645	low_risk
TCGA-UF-A71E-01A	-917.326	-350.433	-1267.76	0.913539	low_risk
TCGA-CR-6492-01A	-465.566	936.782	471.216	0.781234	low_risk
TCGA-CN-A49C-01A	-1459.42	502.765	-956.657	0.894018	low_risk
TCGA-CV-7238-01A	-70.3478	1343.94	1273.59	0.702469	low_risk
TCGA-CV-7099-01A	-611.534	1268.56	657.022	0.76392	low_risk
TCGA-MT-A51W-01A	-790.359	680.081	-110.278	0.831608	low_risk
TCGA-CV-6953-01A	-766.955	882.71	115.755	0.812727	low_risk
TCGA-CN-4738-01A	-403.452	1366.37	962.921	0.734184	low_risk
TCGA-CV-7250-01A	-969.454	416.461	-552.993	0.865918	low_risk
TCGA-CN-A498-01A	-964.437	525.639	-438.797	0.857412	low_risk
TCGA-CV-7406-01A	-104.2	-134.674	-238.874	0.841942	low_risk
TCGA-C9-A480-01A	-1107.68	522.996	-584.682	0.868235	low_risk
TCGA-D6-6824-01A	806.427	1752.24	2558.67	0.556549	low_risk
TCGA-CN-A63T-01A	-176.411	1339.44	1163.03	0.713926	low_risk
TCGA-CV-6938-01A	-173.184	1943.74	1770.56	0.648728	low_risk
TCGA-CV-A45V-01A	-0.454778	1043.69	1043.23	0.726129	low_risk
TCGA-BA-6870-01A	-570.666	1114.53	543.864	0.774533	low_risk
TCGA-IQ-A61J-01A	232.378	1017.45	1249.83	0.704947	low_risk
TCGA-CV-A45Z-01A	-420.353	1100.94	680.59	0.761683	low_risk
TCGA-CV-A461-01A	-228.64	1964.65	1736.01	0.652579	low_risk
TCGA-CR-7388-01A	288.873	1619.08	1907.95	0.633249	low_risk
TCGA-CR-7374-01A	-650.374	705.175	54.8012	0.817908	low_risk
TCGA-CV-6961-01A	-49.9546	593.749	543.794	0.774539	low_risk
TCGA-QK-A6V9-01A	-1508.13	1280.88	-227.259	0.841021	low_risk
TCGA-CV-5973-01A	-1202.22	399.382	-802.836	0.883675	low_risk
TCGA-CN-6017-01A	1231.34	2635.11	3866.46	0.387813	low_risk
TCGA-CQ-A4CE-01A	-824.317	733.746	-90.5711	0.829998	low_risk
TCGA-CR-6484-01A	904.948	2168.68	3073.63	0.492218	low_risk
TCGA-CV-7100-01A	-196.238	1149.31	953.071	0.735165	low_risk
TCGA-BA-5556-01A	-103.567	2051.5	1947.94	0.628696	low_risk
TCGA-F7-8489-01A	-232.352	1621.65	1389.3	0.69028	low_risk
TCGA-CR-7402-01A	-649.586	669.927	20.3413	0.820808	low_risk
TCGA-CN-4735-01A	13.4571	1626.56	1640.02	0.66319	low_risk
TCGA-CV-6955-01A	-967.294	1405.63	438.338	0.784238	low_risk
TCGA-CV-6936-01A	-559.392	782.535	223.143	0.803442	low_risk
TCGA-BA-5152-01A	-141.798	1675.88	1534.09	0.674748	low_risk
TCGA-MT-A7BN-01A	211.907	1603.25	1815.16	0.643732	low_risk
TCGA-CN-A499-01A	-686.543	1573.39	886.845	0.74172	low_risk
TCGA-QK-A8Z7-01A	-819.005	-218.123	-1037.13	0.899248	low_risk
TCGA-T2-A6X0-01A	-625.409	937.497	312.089	0.795601	low_risk
TCGA-CV-7245-01A	-466.676	132.139	-334.538	0.849436	low_risk
TCGA-CV-6441-01A	-1679.27	-129.103	-1808.37	0.942908	low_risk
TCGA-CN-A6V6-01A	-422.558	1844.17	1421.61	0.686841	low_risk
TCGA-CN-4730-01A	-1084.99	-119.662	-1204.65	0.909732	low_risk
TCGA-CR-5243-01A	39.3004	1093.38	1132.68	0.717039	low_risk
TCGA-D6-6827-01A	-621.064	105.708	-515.356	0.863141	low_risk
TCGA-CN-6992-01A	-285.16	162.987	-122.172	0.832576	low_risk
TCGA-HD-8635-01A	-323.127	678.362	355.235	0.791748	low_risk
TCGA-KU-A6H7-06A	-1090.46	1585.43	494.964	0.779053	low_risk
TCGA-CR-6470-01A	353.363	2179.19	2532.55	0.55973	low_risk
TCGA-CV-A45O-01A	-594.212	1036.77	442.56	0.783853	low_risk
TCGA-CR-6487-01A	328.056	2668.33	2996.38	0.502056	low_risk
TCGA-CV-7427-01A	-369.649	1778.39	1408.74	0.688212	low_risk
TCGA-P3-A6T7-01A	-523.414	445.85	-77.5646	0.828932	low_risk
TCGA-IQ-A61G-01A	-1620.73	111.968	-1508.77	0.927354	low_risk
TCGA-CV-A6JT-01A	218.474	1185.69	1404.17	0.6887	low_risk
TCGA-BA-A4IH-01A	-339.146	619.534	280.388	0.798411	low_risk
TCGA-D6-A6EK-01A	-433.476	1783.67	1350.2	0.694422	low_risk
TCGA-CV-A465-01A	-1419.83	-312.614	-1732.44	0.939138	low_risk
TCGA-D6-A4ZB-01A	-673.452	464.316	-209.135	0.839579	low_risk
TCGA-UP-A6WW-01A	-307.891	1114.81	806.92	0.749537	low_risk
TCGA-CR-6473-01A	-1046.87	147.55	-899.323	0.890216	low_risk
TCGA-UF-A7JO-01A	-81.6077	2134.78	2053.17	0.616608	low_risk
TCGA-CV-7180-01A	-1408.23	199.715	-1208.52	0.909967	low_risk
TCGA-D6-A6EO-01A	-914.51	-115.821	-1030.33	0.898811	low_risk
TCGA-UF-A7JF-01A	-975.371	912.239	-63.1314	0.827745	low_risk
TCGA-CV-7428-01A	-173.86	1232.17	1058.31	0.724605	low_risk
TCGA-D6-A6EN-01A	-565.908	2140.11	1574.2	0.67039	low_risk
TCGA-CR-7394-01A	809.764	2308.36	3118.12	0.486523	low_risk
TCGA-CV-7425-01A	-383.555	1041.07	657.511	0.763874	low_risk
TCGA-TN-A7HL-01A	-421.855	2555.84	2133.99	0.607226	low_risk
TCGA-MT-A67D-01A	107.575	1158.84	1266.41	0.703219	low_risk
TCGA-BB-A6UM-01A	-1342.25	1101.46	-240.787	0.842094	low_risk
TCGA-MT-A67F-01A	206.412	2614.26	2820.67	0.524193	low_risk
TCGA-CN-A6V7-01A	-1937.12	299.55	-1637.57	0.934263	low_risk
TCGA-CN-A49B-01A	-161.161	1570.5	1409.34	0.688149	low_risk
TCGA-CN-4736-01A	771.655	1905.06	2676.71	0.54207	low_risk
TCGA-CV-A6K1-01A	-525.124	896.523	371.399	0.790296	low_risk
TCGA-P3-A5QF-01A	-971.457	506.44	-465.017	0.859386	low_risk
TCGA-CV-A6JZ-01A	451.741	2093.66	2545.4	0.558166	low_risk
TCGA-MZ-A6I9-01A	-1197.95	343.014	-854.934	0.887229	low_risk
TCGA-CV-6433-01A	-834.096	1956.55	1122.45	0.718084	low_risk
TCGA-CN-4725-01A	-764.443	-119.83	-884.273	0.889208	low_risk
TCGA-BA-5151-01A	50.0036	1092.4	1142.4	0.716044	low_risk
TCGA-CR-6467-01A	-714.479	2043.9	1329.42	0.696613	low_risk
TCGA-CN-5359-01A	1256.95	2063.17	3320.11	0.460408	low_risk
TCGA-BA-A6DL-01A	-1368.49	155.192	-1213.3	0.910258	low_risk
TCGA-HD-7754-01A	327.012	403.628	730.64	0.756902	low_risk
TCGA-BA-6869-01A	-1246.17	390.383	-855.789	0.887287	low_risk
TCGA-TN-A7HI-01A	-316.375	1512.35	1195.98	0.710532	low_risk
TCGA-MZ-A5BI-01A	-273.073	2342.32	2069.25	0.614749	low_risk
TCGA-BB-4228-01A	-251.156	704.312	453.156	0.782886	low_risk
TCGA-CQ-7065-01A	-1090.26	-557.373	-1647.63	0.934788	low_risk
TCGA-QK-A8Z8-01A	-1196.23	34.0166	-1162.21	0.907128	low_risk
TCGA-F7-A623-01A	-857.328	496.354	-360.974	0.851477	low_risk
TCGA-P3-A6SW-01A	-451.415	1399.62	948.204	0.735649	low_risk
TCGA-CR-7368-01A	-539.626	969.942	430.315	0.784968	low_risk
TCGA-CQ-A4C9-01A	-188.831	286.219	97.3887	0.814295	low_risk
TCGA-CR-7380-01A	472.058	857.639	1329.7	0.696584	low_risk
TCGA-BA-A6DE-01A	-1074.67	159.93	-914.738	0.891244	low_risk
TCGA-D6-6823-01A	-824.087	168.603	-655.484	0.873344	low_risk
TCGA-CN-6012-01A	-212.596	1203.84	991.244	0.731355	low_risk
TCGA-CR-7393-01A	1192.63	2288.93	3481.56	0.439244	low_risk
TCGA-MT-A67A-01A	-971.133	635.034	-336.1	0.849557	low_risk
TCGA-CN-A63U-01A	-1530.61	-353.933	-1884.54	0.946573	low_risk
TCGA-CV-A460-01A	274.343	1745.51	2019.85	0.620452	low_risk
TCGA-CR-7391-01A	831.17	1895.62	2726.79	0.535879	low_risk
TCGA-CR-7385-01A	-711.657	1845.08	1133.42	0.716963	low_risk
TCGA-KU-A6H7-01A	-718.149	1776.02	1057.87	0.72465	low_risk
TCGA-CV-6436-01A	-420.76	1659.43	1238.67	0.706108	low_risk
TCGA-CV-A6K0-01B	564.657	1832.24	2396.9	0.576119	low_risk
TCGA-CN-A6UY-01A	-1063.16	1726.55	663.382	0.763317	low_risk
TCGA-F7-A620-01A	-324.222	1685.16	1360.94	0.693287	low_risk
TCGA-KU-A6H8-01A	-10.1518	794.182	784.03	0.751757	low_risk
TCGA-CN-A6V3-01A	-901.908	950.819	48.9111	0.818405	low_risk
TCGA-BA-5559-01A	457.304	2357.99	2815.29	0.524865	low_risk
TCGA-CR-6481-01A	366.206	2797.42	3163.62	0.480677	low_risk
TCGA-BA-A6DD-01A	10.7443	1405.62	1416.37	0.6874	low_risk
TCGA-TN-A7HJ-01A	-1067.44	266.616	-800.822	0.883537	low_risk
TCGA-P3-A5Q5-01A	-211.506	2620.39	2408.88	0.57468	low_risk
TCGA-D6-6515-01A	1099.52	2293.07	3392.59	0.450938	low_risk
TCGA-IQ-7632-01A	-1145.31	100.457	-1044.86	0.899744	low_risk
TCGA-BA-A4IG-01A	-1302.53	697.047	-605.479	0.869745	low_risk
TCGA-CN-6988-01A	-1432.87	-554.815	-1987.69	0.951347	low_risk
TCGA-P3-A6T6-01A	-1436.91	-260.676	-1697.58	0.937368	low_risk
TCGA-CR-6482-01A	374.092	2396.29	2770.38	0.530465	low_risk
TCGA-CV-5441-01A	-388.057	440.386	52.329	0.818116	low_risk
TCGA-CV-7178-01A	760.666	1373.59	2134.26	0.607194	low_risk
TCGA-CV-5442-01A	-1796.65	-380.245	-2176.9	0.959537	low_risk
TCGA-CN-6996-01A	362.867	1847.16	2210.02	0.598321	low_risk
TCGA-IQ-A61E-01A	-520.3	975.337	455.037	0.782714	low_risk
TCGA-CN-A641-01A	-1154.99	51.0758	-1103.92	0.903493	low_risk
TCGA-CN-4741-01A	-857.786	401.388	-456.397	0.858739	low_risk
TCGA-T2-A6WX-01A	-545.716	2089.03	1543.31	0.673748	low_risk
TCGA-UF-A7JH-01A	533.642	1160.18	1693.82	0.657259	low_risk
TCGA-CV-A45Y-01A	633.867	1755.13	2389	0.577066	low_risk
TCGA-CR-6472-01A	-512.662	111.915	-400.747	0.854524	low_risk
TCGA-CV-6942-01A	790.65	2106.4	2897.05	0.514613	low_risk
TCGA-CR-6480-01A	-1357.03	623.059	-733.974	0.878899	low_risk
TCGA-BB-4217-01A	-335.275	2197.1	1861.83	0.638475	low_risk
TCGA-D6-A74Q-01A	-630.862	790.356	159.494	0.80897	low_risk
TCGA-CV-7255-01A	-1255.64	-285.758	-1541.39	0.929136	low_risk
TCGA-CQ-6223-01A	-818.247	853.211	34.9636	0.81958	low_risk
TCGA-CR-7404-01A	-242.376	1624.85	1382.47	0.691005	low_risk
TCGA-UF-A719-01A	-1272.71	217.355	-1055.35	0.900415	low_risk
TCGA-CN-4728-01A	1676.9	1970.54	3647.44	0.417241	low_risk
TCGA-UF-A7JS-01A	-297.088	1589.16	1292.08	0.700535	low_risk
TCGA-CN-4733-01A	1223.44	2721.59	3945.03	0.377156	low_risk
TCGA-CV-A45X-01A	-1155.69	265.699	-889.986	0.889591	low_risk
TCGA-IQ-A6SH-01A	-388.432	1191.27	802.834	0.749934	low_risk
TCGA-CQ-7068-01A	-591.91	1847.97	1256.06	0.704298	low_risk
TCGA-HD-A6HZ-01A	285.637	1603.12	1888.75	0.635428	low_risk
TCGA-HD-7831-01A	1215.14	602.647	1817.79	0.643436	high_risk
TCGA-CV-6959-01A	-30.1697	1096.46	1066.29	0.723798	high_risk
TCGA-CV-7413-01A	394.903	1092.11	1487.01	0.679832	high_risk
TCGA-QK-A64Z-01A	-556.558	396.91	-159.647	0.835611	high_risk
TCGA-BB-8601-01A	-1658.44	-908.311	-2566.75	0.974071	high_risk
TCGA-CN-5373-01A	635.837	1576.31	2212.15	0.598071	high_risk
TCGA-D6-8569-01A	-378.129	753.069	374.94	0.789977	high_risk
TCGA-CV-6937-01A	-351.38	349.91	-1.47045	0.822632	high_risk
TCGA-QK-A8ZB-01A	-155.053	424.733	269.68	0.799356	high_risk
TCGA-BA-4075-01A	-481.942	809.364	327.422	0.794235	high_risk
TCGA-T3-A92M-01A	334.034	1242.11	1576.14	0.670179	high_risk
TCGA-CN-5365-01A	-619.447	1155.17	535.719	0.775289	high_risk
TCGA-CV-7429-01A	8.26819	821.692	829.96	0.747294	high_risk
TCGA-F7-8298-01A	-204.833	488.326	283.493	0.798136	high_risk
TCGA-CV-7416-01A	292.194	475.414	767.608	0.753345	high_risk
TCGA-CV-7102-01A	613.811	1002.12	1615.94	0.665832	high_risk
TCGA-CV-7568-01A	230.511	193.545	424.055	0.785536	high_risk
TCGA-CN-6998-01A	-864.246	463.434	-400.812	0.854529	high_risk
TCGA-CV-6941-01A	362.3	555.555	917.855	0.738659	high_risk
TCGA-BB-A5HY-01A	-1037.03	55.606	-981.426	0.895641	high_risk
TCGA-CN-6997-01A	-458.158	-99.2748	-557.433	0.866244	high_risk
TCGA-CN-5364-01A	-160.523	871.33	710.807	0.758801	high_risk
TCGA-CN-A63V-01A	551.419	457.105	1008.52	0.729622	high_risk
TCGA-CR-7386-01A	1488.7	1919.78	3408.48	0.448855	high_risk
TCGA-CN-A642-01A	-337.719	1198.77	861.051	0.744254	high_risk
TCGA-BB-A6UO-01A	133.078	624.764	757.841	0.754287	high_risk
TCGA-CR-7372-01A	257.938	373.018	630.957	0.766383	high_risk
TCGA-BB-A5HZ-01A	-446.44	-87.6637	-534.104	0.864527	high_risk
TCGA-CQ-5332-01A	148.071	158.496	306.568	0.796091	high_risk
TCGA-CQ-6224-01A	1092.85	1288.27	2381.12	0.578011	high_risk
TCGA-CV-7424-01A	511.144	792.364	1303.51	0.699337	high_risk
TCGA-HD-7832-01A	-608.311	803.668	195.357	0.805864	high_risk
TCGA-CQ-A4C7-01A	241.525	437.304	678.828	0.76185	high_risk
TCGA-CQ-A4CB-01A	470.498	1006.15	1476.65	0.680947	high_risk
TCGA-CN-A63W-01A	-1023.85	202.454	-821.392	0.884947	high_risk
TCGA-BA-5557-01A	1001.33	2173.88	3175.2	0.479185	high_risk
TCGA-UF-A7JD-01A	658.62	333.305	991.925	0.731286	high_risk
TCGA-CR-7399-01A	-224.046	1844.35	1620.31	0.665353	high_risk
TCGA-CV-6948-01A	-711.009	757.557	46.5477	0.818604	high_risk
TCGA-CV-7247-01A	-396.566	-305.972	-702.538	0.876688	high_risk
TCGA-DQ-5624-01A	14.8778	749.895	764.773	0.753618	high_risk
TCGA-H7-8502-01A	-100.092	443.953	343.861	0.792766	high_risk
TCGA-CN-6989-01A	1077.46	1495.22	2572.68	0.554839	high_risk
TCGA-MZ-A7D7-01A	-1354.04	-209.833	-1563.87	0.93035	high_risk
TCGA-BB-8596-01A	967.395	1305.82	2273.22	0.590862	high_risk
TCGA-CQ-7071-01A	-6.78155	1099.74	1092.96	0.72109	high_risk
TCGA-MT-A51X-01A	-406.012	339.992	-66.0197	0.827982	high_risk
TCGA-4P-AA8J-01A	601.106	1315.9	1917	0.63222	high_risk
TCGA-CV-5439-01A	-1063.66	739.633	-324.029	0.848621	high_risk
TCGA-CV-5971-01A	1343.89	1787.02	3130.92	0.484881	high_risk
TCGA-CN-6995-01A	-360.882	1562.59	1201.7	0.70994	high_risk
TCGA-DQ-5631-01A	-523.841	15.3501	-508.491	0.862632	high_risk
TCGA-DQ-7588-01A	-1709.13	-644.038	-2353.17	0.966501	high_risk
TCGA-CR-7373-01A	-308.121	1642.66	1334.53	0.696074	high_risk
TCGA-CQ-6228-01A	-294.735	198.621	-96.1135	0.830451	high_risk
TCGA-IQ-7630-01A	-395.302	797.995	402.693	0.787473	high_risk
TCGA-D6-A6EP-01A	176.973	103.841	280.814	0.798373	high_risk
TCGA-WA-A7H4-01A	-18.1649	489.416	471.251	0.781231	high_risk
TCGA-CV-5976-01A	-465.046	254.417	-210.629	0.839698	high_risk
TCGA-CV-6954-01A	95.0718	819.042	914.114	0.739029	high_risk
TCGA-CV-7411-01A	-6.32996	502.942	496.612	0.778901	high_risk
TCGA-CV-6962-01A	-1209.92	-632.705	-1842.63	0.944571	high_risk
TCGA-KU-A66T-01A	-1482.95	-375.873	-1858.82	0.945349	high_risk
TCGA-CQ-6219-01A	516.441	1722.72	2239.17	0.594887	high_risk
TCGA-CQ-6229-01A	-240.865	781.952	541.087	0.774791	high_risk
TCGA-CR-7365-01A	101.398	293.274	394.672	0.788198	high_risk
TCGA-HD-7753-01A	-51.1297	722.888	671.758	0.762522	high_risk
TCGA-BA-A6DG-01A	1058.28	1296.63	2354.92	0.581145	high_risk
TCGA-CQ-A4CD-01A	-517.601	1106.02	588.42	0.770379	high_risk
TCGA-CN-6020-01A	354.559	964.11	1318.67	0.697744	high_risk
TCGA-CV-5977-01A	-924.187	192.581	-731.606	0.878733	high_risk
TCGA-UF-A718-01A	-19.2091	814.921	795.712	0.750625	high_risk
TCGA-CN-5363-01A	338.135	1205.7	1543.84	0.673691	high_risk
TCGA-QK-A6II-01A	-1102.37	795.899	-306.474	0.847255	high_risk
TCGA-CN-5370-01A	1283.74	1947.8	3231.55	0.47191	high_risk
TCGA-CV-7104-01A	282.457	1263.28	1545.74	0.673485	high_risk
TCGA-QK-A6VB-01A	-994.625	-335.942	-1330.57	0.91725	high_risk
TCGA-CV-7432-01A	-911.152	176.458	-734.694	0.878949	high_risk
TCGA-IQ-A61H-01A	-207.701	157.225	-50.4752	0.826701	high_risk
TCGA-CV-6956-01A	-1167.56	-730.741	-1898.3	0.947222	high_risk
TCGA-CQ-6221-01A	1104.9	832.637	1937.54	0.629881	high_risk
TCGA-BA-A6DA-01A	-703.572	888.054	184.482	0.806808	high_risk
TCGA-CR-6474-01A	1007.3	1322.07	2329.37	0.584193	high_risk
TCGA-CQ-5334-01A	722.183	1794.97	2517.15	0.561602	high_risk
TCGA-CV-7437-01A	-983.556	-38.2262	-1021.78	0.89826	high_risk
TCGA-CV-5432-01A	-737.887	136.917	-600.97	0.869419	high_risk
TCGA-CV-6934-01A	1643.74	1724.12	3367.86	0.454176	high_risk
TCGA-CN-5356-01A	121.176	449.15	570.326	0.77207	high_risk
TCGA-CQ-6225-01A	-1917.59	-384.883	-2302.48	0.964564	high_risk
TCGA-CN-4737-01A	328.257	480.344	808.601	0.749374	high_risk
TCGA-CV-7252-01A	-7.81435	851.624	843.81	0.745942	high_risk
TCGA-CV-6003-01A	-1047.88	130.79	-917.087	0.891401	high_risk
TCGA-F7-A50I-01A	-516.843	754.933	238.09	0.802134	high_risk
TCGA-CV-7407-01A	-704.826	1340.15	635.319	0.765972	high_risk
TCGA-CN-4734-01A	160.902	1649	1809.9	0.644322	high_risk
TCGA-CV-7236-01A	136.22	553.348	689.568	0.760828	high_risk
TCGA-CR-7382-01A	1505.17	2293.91	3799.08	0.396911	high_risk
TCGA-CV-7433-01A	1264.53	2197.09	3461.62	0.441871	high_risk
TCGA-CN-6022-01A	534.8	1281.67	1816.47	0.643584	high_risk
TCGA-CN-6023-01A	-483.274	1498.51	1015.23	0.728948	high_risk
TCGA-CV-6933-01A	48.7926	1286.2	1334.99	0.696026	high_risk
TCGA-DQ-5630-01A	748.179	1830.58	2578.76	0.554096	high_risk
TCGA-BA-4074-01A	268.869	697.794	966.663	0.733811	high_risk
TCGA-P3-A6SX-01A	-739.02	-435.739	-1174.76	0.907901	high_risk
TCGA-CR-7379-01A	456.803	786.591	1243.39	0.705617	high_risk
TCGA-CN-4742-01A	597.565	864.518	1462.08	0.682511	high_risk
TCGA-F7-A61S-01A	-833.07	1377.67	544.599	0.774465	high_risk
TCGA-BA-A6D8-01A	-173.999	545.248	371.249	0.79031	high_risk
TCGA-P3-A6T4-01A	-981.755	188.651	-793.104	0.883005	high_risk
TCGA-CR-7389-01A	386.428	950.028	1336.46	0.695872	high_risk
TCGA-CV-6935-01A	-56.4985	70.5837	14.0852	0.821332	high_risk
TCGA-CR-7401-01A	382.39	736.982	1119.37	0.718399	high_risk
TCGA-CV-5436-01A	-532.424	377.268	-155.155	0.835248	high_risk
TCGA-CR-6493-01A	-984.094	132.166	-851.928	0.887025	high_risk
TCGA-BA-4076-01A	-1138.12	-40.8407	-1178.96	0.90816	high_risk
TCGA-CV-5979-01A	-823.293	307.18	-516.113	0.863197	high_risk
TCGA-CV-7095-01A	-645.964	446.783	-199.182	0.838784	high_risk
TCGA-CV-A6JM-01A	-594.696	677.058	82.3617	0.815573	high_risk
TCGA-QK-AA3K-01A	860.168	1268.72	2128.88	0.607821	high_risk
TCGA-BB-4224-01A	-1371.74	128.453	-1243.29	0.912072	high_risk
TCGA-UF-A71B-01A	-49.9028	755.118	705.215	0.759336	high_risk
TCGA-CV-6945-01A	-862.657	-66.0603	-928.718	0.892173	high_risk
TCGA-CV-7253-01A	-1663.23	-402.136	-2065.37	0.954798	high_risk
TCGA-P3-A6T8-01A	206.589	28.6009	235.19	0.802388	high_risk
TCGA-CR-5247-01A	271.048	-387.145	-116.097	0.832082	high_risk
TCGA-CV-7103-01A	768.699	87.1792	855.878	0.744761	high_risk
TCGA-CV-A45Q-01A	-898.84	723.418	-175.422	0.83688	high_risk
TCGA-P3-A6T2-01A	-493.509	243.862	-249.647	0.842795	high_risk
TCGA-CQ-A4C6-01A	-157.928	1010.48	852.555	0.745086	high_risk
TCGA-BA-6873-01A	-439.205	814.166	374.961	0.789976	high_risk
TCGA-UF-A7JV-01A	-91.7779	1492.43	1400.65	0.689074	high_risk
TCGA-BA-4078-01A	422.708	630.585	1053.29	0.725113	high_risk
TCGA-CV-7434-01A	-518.028	724.881	206.853	0.804863	high_risk
TCGA-CV-6952-01A	-523.535	932.098	408.563	0.786942	high_risk
TCGA-CQ-5326-01A	-94.5736	1052.93	958.358	0.734638	high_risk
TCGA-CN-6019-01A	1595.39	1906.16	3501.55	0.436606	high_risk
TCGA-CQ-7069-01A	-304.417	388.744	84.3265	0.815407	high_risk
TCGA-BA-6868-01B	-1032.9	-71.0878	-1103.99	0.903498	high_risk
TCGA-CQ-5330-01A	886.365	1826.15	2712.51	0.537647	high_risk
TCGA-CV-7423-01A	-664.108	-71.1019	-735.21	0.878985	high_risk
TCGA-CV-A6JU-01A	-311.583	593.619	282.036	0.798265	high_risk
TCGA-CV-7177-01A	598.921	161.994	760.915	0.75399	high_risk
TCGA-DQ-5629-01A	-638.537	-343.747	-982.284	0.895697	high_risk
TCGA-CV-7446-01A	-517.901	102.549	-415.352	0.855636	high_risk
TCGA-P3-A6T0-01A	-800.855	-190.818	-991.673	0.896309	high_risk
TCGA-CR-7383-01A	695.401	1572.92	2268.32	0.591442	high_risk
TCGA-CV-5966-01A	-123.226	1472.01	1348.78	0.694571	high_risk
TCGA-BA-A4II-01A	-313.411	751.757	438.346	0.784237	high_risk
TCGA-CV-7438-01A	-42.6283	970.539	927.911	0.737663	high_risk
TCGA-CV-7097-01A	507.602	1234.81	1742.41	0.651866	high_risk
TCGA-QK-A8Z9-01B	972.87	1078.19	2051.07	0.616852	high_risk
TCGA-HD-A6I0-01A	-369.353	1244.36	875.006	0.742884	high_risk
TCGA-CV-6950-01A	-207.944	447.79	239.845	0.80198	high_risk
TCGA-UF-A7JK-01A	-1048.08	-578.096	-1626.17	0.933665	high_risk
TCGA-D6-A6ES-01A	-855.304	926.856	71.5517	0.816491	high_risk
TCGA-CQ-A4CH-01A	-419.523	558.715	139.192	0.810718	high_risk
TCGA-CV-7254-01A	1177.03	2014.76	3191.79	0.477047	high_risk
TCGA-CR-6478-01A	368.229	2345.88	2714.11	0.537449	high_risk
TCGA-CQ-6218-01A	-21.464	972.936	951.472	0.735324	high_risk
TCGA-HD-7229-01A	-978.473	996.671	18.1984	0.820987	high_risk
TCGA-IQ-7631-01A	541.844	-114.757	427.087	0.785261	high_risk
TCGA-CQ-7072-01A	643.043	418.859	1061.9	0.724242	high_risk
TCGA-H7-8501-01A	303.086	2300.78	2603.87	0.551025	high_risk
TCGA-BA-A8YP-01A	234.023	135.266	369.289	0.790486	high_risk
TCGA-CV-7183-01A	-450.261	-193.187	-643.448	0.872483	high_risk
TCGA-CV-6960-01A	-1187.06	-132.809	-1319.86	0.916623	high_risk
TCGA-P3-A6T5-01A	-226.591	641.736	415.145	0.786345	high_risk
TCGA-CN-4726-01A	431.688	976.705	1408.39	0.688249	high_risk
TCGA-F7-A624-01A	-388.253	2405.38	2017.12	0.620766	high_risk
TCGA-QK-A6IH-01A	-426.019	457.629	31.6099	0.819862	high_risk
TCGA-CV-5440-01A	-940.884	-147.882	-1088.77	0.902538	high_risk
TCGA-CV-5970-01A	141.214	698.947	840.161	0.746298	high_risk
TCGA-CV-5978-01A	1002.17	1503.35	2505.51	0.563015	high_risk
TCGA-CN-6994-01A	42.2854	580.928	623.214	0.767113	high_risk
TCGA-CV-7418-01A	-971.879	616.999	-354.88	0.851008	high_risk
TCGA-IQ-A6SG-01A	-1000.55	-137.533	-1138.08	0.905631	high_risk
TCGA-CV-A6JE-01A	35.8498	1403.3	1439.15	0.684967	high_risk
TCGA-BA-6872-01A	-192.438	544.662	352.224	0.792018	high_risk
TCGA-BB-4227-01A	-1200.81	-19.4327	-1220.25	0.91068	high_risk
TCGA-CV-7415-01A	212.125	1149.58	1361.71	0.693205	high_risk
TCGA-BA-A6DI-01A	-1148.46	132.275	-1016.19	0.897899	high_risk
TCGA-CQ-A4CI-01A	-344.626	-545.839	-890.465	0.889623	high_risk
TCGA-BB-A5HU-01A	205.085	553.101	758.186	0.754253	high_risk
TCGA-HD-A634-01A	-1807.16	-993.706	-2800.87	0.98127	high_risk
TCGA-CV-5434-01A	771.234	1276.12	2047.35	0.617281	high_risk
TCGA-D6-8568-01A	170.223	982.894	1153.12	0.714945	high_risk
TCGA-P3-A5Q6-01A	201.05	308.417	509.466	0.777717	high_risk
TCGA-CN-A49A-01A	-132.175	-550.519	-682.694	0.875283	high_risk
TCGA-CV-5430-01A	-186.11	1223.51	1037.4	0.726717	high_risk
TCGA-CV-7261-01A	70.5775	382.58	453.157	0.782886	high_risk
TCGA-CR-7370-01A	-185.69	233.553	47.8632	0.818493	high_risk
TCGA-CN-5367-01A	-238.63	731.542	492.912	0.779242	high_risk
TCGA-CV-7435-01A	1138.46	1106.13	2244.58	0.594248	high_risk
TCGA-F7-A622-01A	-1085.68	69.4185	-1016.27	0.897904	high_risk
TCGA-UF-A7JA-01A	-415.827	-63.3141	-479.141	0.860444	high_risk
TCGA-T3-A92N-01A	-701.58	719.357	17.7767	0.821022	high_risk
TCGA-UF-A7JC-01A	-1095.26	-263.028	-1358.29	0.918863	high_risk
TCGA-UF-A71A-06A	-814.367	-585.713	-1400.08	0.921267	high_risk
TCGA-D6-6517-01A	-489.222	936.847	447.625	0.783391	high_risk
TCGA-DQ-7592-01A	-111.088	766.221	655.133	0.764099	high_risk
TCGA-CN-4740-01A	1567.96	1881.47	3449.44	0.443475	high_risk
TCGA-CN-6018-01A	595.607	1511.18	2106.78	0.610394	high_risk
TCGA-CR-7367-01A	981.59	1066.78	2048.37	0.617163	high_risk
TCGA-CV-5435-01A	-632.88	-319.326	-952.206	0.893725	high_risk
TCGA-BA-7269-01A	103.21	467.495	570.705	0.772035	high_risk
TCGA-CR-7371-01A	168.389	1353.16	1521.55	0.676105	high_risk
TCGA-CV-7440-01A	-815.311	384.009	-431.302	0.856845	high_risk
TCGA-CV-A6K2-01A	-439.037	957.067	518.03	0.776926	high_risk
TCGA-BA-5555-01A	-589.301	589.792	0.490755	0.822468	high_risk
TCGA-UF-A7J9-01A	667.395	603.246	1270.64	0.702777	high_risk
TCGA-CV-7091-01A	-39.7899	670.553	630.763	0.766402	high_risk
TCGA-CN-6016-01A	1187.21	1333.9	2521.11	0.561121	high_risk
TCGA-CV-6940-01A	-521.596	137.658	-383.938	0.85324	high_risk
TCGA-QK-A6IG-01A	-464.551	1052.5	587.948	0.770424	high_risk
TCGA-CN-5361-01A	749.592	673.248	1422.84	0.686709	high_risk
TCGA-RS-A6TO-01A	-136.007	1058.45	922.445	0.738205	high_risk
TCGA-CN-5366-01A	205.025	853.466	1058.49	0.724587	high_risk
TCGA-CN-4731-01A	-290.956	488.611	197.655	0.805664	high_risk
TCGA-CQ-A4CG-01A	-399.286	-36.7119	-435.998	0.8572	high_risk
TCGA-CX-7219-01A	524.476	1282.33	1806.81	0.644669	high_risk
TCGA-IQ-A61O-01A	1446.52	1079.4	2525.92	0.560536	high_risk
TCGA-CV-A6JD-01A	-40.3772	1700.78	1660.4	0.660948	high_risk
TCGA-P3-A6T3-01A	-902.225	-101.81	-1004.04	0.897112	high_risk
TCGA-P3-A5QA-01A	-180.128	64.9634	-115.165	0.832006	high_risk
TCGA-QK-A8ZA-01A	-1521.2	-358.312	-1879.51	0.946335	high_risk
TCGA-CQ-6220-01A	-702.296	688.241	-14.0551	0.823681	high_risk
TCGA-UF-A71A-01A	-27.4991	-102.241	-129.74	0.833191	high_risk
TCGA-WA-A7GZ-01A	-718.683	-102.211	-820.894	0.884913	high_risk
TCGA-CN-6024-01A	-403.346	-577.872	-981.218	0.895628	high_risk
TCGA-CN-6011-01A	-598.22	705.968	107.748	0.813411	high_risk
TCGA-CQ-5324-01A	-188.343	780.34	591.998	0.770044	high_risk
TCGA-CQ-5329-01A	426.056	1331.19	1757.25	0.650214	high_risk
TCGA-CV-7430-01A	-1346.13	-240.418	-1586.54	0.931566	high_risk
TCGA-BA-6871-01A	753.817	1120.8	1874.62	0.637028	high_risk
TCGA-CV-A6JO-01B	-493.212	1420.35	927.136	0.73774	high_risk
TCGA-CQ-6227-01A	545.355	651.511	1196.87	0.71044	high_risk
TCGA-CV-6951-01A	-861.488	-244.649	-1106.14	0.903633	high_risk
TCGA-CV-7090-01A	595.729	1584.83	2180.56	0.60178	high_risk
TCGA-DQ-5625-01A	18.4775	1817.8	1836.27	0.641357	high_risk
TCGA-CR-7390-01A	-210.92	68.1603	-142.76	0.834246	high_risk
TCGA-CV-A464-01A	544.494	843.056	1387.55	0.690466	high_risk
TCGA-C9-A47Z-01A	-1030.21	211.355	-818.859	0.884774	high_risk
TCGA-CN-6010-01A	-392.174	383.001	-9.17302	0.823275	high_risk
TCGA-CV-7235-01A	833.467	1433.52	2266.99	0.591599	high_risk
TCGA-CX-7086-01A	-1176.76	261.562	-915.198	0.891275	high_risk
TCGA-CV-7422-01A	-86.4635	689.687	603.223	0.768992	high_risk

## Sheet: Supplementary Table 7
List of ImmuCellAI score in the indicated groups
	Tc	CD8_T	NK	DC	Tfh	Macrophage	Th1	Th2	Th17	Neutrophil	Tr1	Monocyte	CD4_T	Tgd	B_cell	Tex	Tcm	NKT	CD8_naive	CD4_naive	MAIT	iTreg	nTreg	Tem	riskScore	risk
TCGA-4P-AA8J-01A	0.39	0.258	0.236	0.204	0.219	0.223	0.223	0.183	0.09	0.095	0.135	0.166	0.182	0.094	0.065	0.107	0.045	0.148	0.059	0	0.216	0.139	0.101	0.036	1.44282	high
TCGA-BA-4074-01A	0.2	0.176	0.156	0.227	0	0.207	0.113	0.295	0.213	0.162	0.127	0.165	0.087	0.045	0.061	0.088	0.041	0.078	0.096	0	0.232	0.1	0.089	0.068	2.94194	high
TCGA-BA-4075-01A	0.195	0	0.237	0.279	0	0.316	0.164	0.217	0.122	0.25	0.191	0.162	0.048	0	0.088	0.042	0.046	0.158	0	0	0.152	0.078	0.043	0.049	6.47054	high
TCGA-BA-4076-01A	0.223	0.215	0.061	0.168	0.149	0.069	0.142	0.037	0.232	0.208	0.184	0.124	0.104	0.064	0.062	0.03	0.048	0.106	0.057	0	0.242	0.142	0.11	0.03	1.46974	high
TCGA-BA-4077-01B	0.385	0.241	0.268	0.239	0.292	0.255	0.244	0.232	0.132	0.113	0.123	0.111	0.12	0.1	0.116	0.129	0.108	0.032	0.019	0	0.223	0.152	0.117	0.04	0.555434	low
TCGA-BA-4078-01A	0.247	0.251	0.134	0.177	0.229	0.259	0.115	0.242	0.158	0.118	0.193	0.155	0.189	0.084	0.074	0.032	0.096	0	0.114	0.02	0.182	0.195	0.123	0.038	1.27333	high
TCGA-BA-5151-01A	0.31	0.207	0.148	0.209	0.203	0.243	0.125	0.145	0.191	0.248	0.215	0.157	0.134	0.009	0.079	0.022	0.135	0.074	0.084	0	0.247	0.18	0.114	0	1.0487	low
TCGA-BA-5152-01A	0.419	0.29	0.249	0.239	0.252	0.233	0.194	0.174	0.103	0.145	0.162	0.125	0.14	0.137	0.073	0.085	0.071	0.011	0.052	0	0.238	0.166	0.134	0.021	1.01577	low
TCGA-BA-5153-01A	0.447	0.314	0.316	0.137	0.396	0.092	0.215	0.193	0.169	0.083	0.191	0.085	0.155	0.165	0.143	0.111	0.119	0	0.029	0	0.157	0.199	0.073	0	0.346446	low
TCGA-BA-5555-01A	0.325	0.278	0.195	0.195	0.11	0.15	0.211	0.127	0.142	0.15	0.166	0.107	0.126	0.119	0.099	0.103	0.074	0.016	0.092	0	0.236	0.175	0.157	0.029	1.40481	high
TCGA-BA-5556-01A	0.436	0.332	0.317	0.201	0.29	0.182	0.255	0.183	0.103	0.109	0.192	0.1	0.114	0.14	0.11	0.133	0.127	0.003	0.025	0	0.198	0.2	0.115	0	0.68132	low
TCGA-BA-5557-01A	0.397	0.234	0.246	0.265	0.262	0.38	0.175	0.148	0.172	0.217	0.179	0.208	0.112	0.039	0.033	0.087	0.084	0.076	0.007	0	0.235	0.193	0.109	0	2.19122	high
TCGA-BA-5558-01A	0.426	0.291	0.241	0.219	0.139	0.291	0.234	0.152	0.161	0.202	0.191	0.159	0.059	0.076	0.064	0.074	0.04	0.077	0.049	0	0.226	0.18	0.141	0.001	0.927393	low
TCGA-BA-5559-01A	0.404	0.293	0.225	0.195	0.306	0.254	0.233	0.167	0.101	0.077	0.202	0.159	0.172	0.115	0.11	0.155	0.105	0.127	0.025	0	0.146	0.256	0.08	0	0.357903	low
TCGA-BA-6868-01B	0.311	0.15	0.181	0.143	0.08	0.057	0.118	0.213	0.162	0.225	0.123	0.109	0.127	0.099	0.067	0.057	0.056	0.083	0.098	0.007	0.177	0.096	0.086	0.011	1.96146	high
TCGA-BA-6869-01A	0.364	0.255	0.288	0.106	0.218	0.065	0.221	0.196	0.192	0.17	0.161	0.08	0.054	0.149	0.101	0.074	0.038	0	0.075	0	0.223	0.082	0.088	0.093	0.682491	low
TCGA-BA-6870-01A	0.287	0.281	0.244	0.178	0.222	0.049	0.048	0.205	0.166	0.161	0.222	0.071	0.131	0.104	0.179	0.049	0.109	0.067	0.101	0	0.264	0.141	0.111	0.005	0.624246	low
TCGA-BA-6871-01A	0.415	0.234	0.235	0.132	0.244	0.216	0.241	0.226	0.12	0.167	0.165	0.206	0.151	0.144	0.054	0.127	0.076	0.005	0.115	0	0.188	0.158	0.076	0.002	1.37945	high
TCGA-BA-6872-01A	0.307	0.229	0.18	0.256	0.099	0.169	0.123	0.185	0.223	0.194	0.153	0.166	0.117	0.051	0.049	0.038	0.073	0.094	0.055	0	0.281	0.116	0.066	0	1.5096	high
TCGA-BA-6873-01A	0.371	0.235	0.208	0.19	0.137	0.146	0.277	0.16	0.114	0.139	0.141	0.136	0.128	0.079	0.038	0.069	0.036	0.098	0.072	0	0.228	0.241	0.08	0.051	1.63658	high
TCGA-BA-7269-01A	0.358	0.281	0.243	0.178	0.144	0.162	0.15	0.244	0.125	0.137	0.155	0.199	0.077	0.097	0.028	0.1	0	0.091	0.095	0	0.275	0.009	0.05	0.016	3.07059	high
TCGA-BA-A4IF-01A	0.24	0.175	0.187	0.116	0.039	0.05	0.085	0.121	0.186	0.175	0.088	0.131	0.141	0.13	0.112	0.039	0.037	0.118	0.124	0	0.274	0.159	0.042	0.026	0.779281	low
TCGA-BA-A4IG-01A	0.352	0.3	0.203	0.166	0.358	0.075	0.223	0.187	0.136	0.094	0.165	0.077	0.174	0.125	0.177	0.065	0.159	0	0.049	0	0.22	0.15	0.065	0.059	0.992233	low
TCGA-BA-A4IH-01A	0.377	0.229	0.173	0.116	0.288	0.135	0.204	0.233	0.137	0.097	0.141	0.139	0.171	0.09	0.075	0.125	0.087	0.019	0.085	0	0.223	0.158	0.091	0.059	0.580605	low
TCGA-BA-A4II-01A	0.353	0.249	0.257	0.197	0.235	0.176	0.222	0.11	0.14	0.211	0.176	0.146	0.138	0.013	0.064	0.09	0.087	0.05	0.08	0	0.249	0.138	0.133	0.045	1.69815	high
TCGA-BA-A6D8-01A	0.27	0.198	0.218	0.181	0.127	0.247	0.078	0.291	0.179	0.189	0.122	0.212	0.131	0.076	0.113	0.086	0	0.124	0.099	0	0.257	0	0	0.007	1.94191	high
TCGA-BA-A6DA-01A	0.376	0.28	0.34	0.16	0.128	0.155	0.266	0.187	0.21	0.233	0.069	0.148	0.091	0.035	0.08	0.139	0	0.102	0	0	0.243	0.019	0.072	0.069	1.14284	high
TCGA-BA-A6DB-01A	0.408	0.367	0.272	0.209	0.366	0.176	0.211	0.108	0.136	0.044	0.141	0.077	0.191	0.176	0.078	0.074	0.093	0.139	0.048	0	0.255	0.203	0.055	0	0.590643	low
TCGA-BA-A6DD-01A	0.4	0.267	0.261	0.191	0.311	0.158	0.272	0.196	0.098	0.113	0.155	0.139	0.155	0.114	0.096	0.125	0.107	0.042	0.055	0	0.262	0.092	0.073	0.047	0.942406	low
TCGA-BA-A6DE-01A	0.273	0.238	0.172	0.177	0.201	0.047	0.205	0.151	0.195	0.207	0.065	0.098	0.09	0.113	0.074	0.096	0.051	0.05	0.076	0	0.145	0.154	0.077	0.094	0.85871	low
TCGA-BA-A6DG-01A	0.395	0.198	0.261	0.191	0.164	0.263	0.126	0.229	0.161	0.168	0.155	0.217	0.168	0.054	0.002	0.023	0.073	0.122	0.115	0	0.235	0.187	0.081	0.014	2.20533	high
TCGA-BA-A6DI-01A	0.219	0.213	0.154	0.146	0.165	0.044	0.172	0.127	0.227	0.189	0.067	0.109	0.149	0.064	0.07	0.065	0.032	0.066	0.086	0.009	0.275	0.145	0.081	0.064	1.37759	high
TCGA-BA-A6DJ-01A	0.439	0.269	0.307	0.209	0.218	0.173	0.275	0.172	0.147	0.155	0.124	0.083	0.098	0.075	0.033	0.11	0.047	0.051	0.082	0	0.176	0.174	0.128	0.046	0.771513	low
TCGA-BA-A6DL-01A	0.285	0.25	0.243	0.079	0.123	0.013	0.231	0.255	0.195	0.182	0.091	0.065	0.126	0.077	0.12	0.107	0.041	0.086	0.066	0	0.198	0.056	0.068	0.104	0.627058	low
TCGA-BA-A8YP-01A	0.135	0.103	0.052	0.262	0.14	0.285	0.068	0.07	0.172	0.15	0.211	0.205	0.141	0.032	0.08	0.021	0.041	0.15	0.105	0.016	0.128	0.17	0.061	0	1.77332	high
TCGA-BB-4217-01A	0.337	0.307	0.253	0.063	0.399	0.013	0.157	0.22	0.097	0.051	0.243	0.042	0.247	0.102	0.272	0.041	0.184	0	0.077	0	0.279	0.176	0.072	0	0.500872	low
TCGA-BB-4223-01A	0.419	0.285	0.237	0.136	0.354	0.121	0.253	0.145	0.079	0.08	0.184	0.135	0.19	0.124	0.167	0.118	0.169	0	0.081	0	0.128	0.235	0.12	0.022	0.279851	low
TCGA-BB-4224-01A	0.243	0.185	0.065	0.246	0.077	0.234	0.157	0.061	0.105	0.177	0.129	0.235	0.064	0.046	0.145	0.091	0.007	0.055	0.141	0	0.224	0.012	0.071	0.059	1.24142	high
TCGA-BB-4225-01A	0.442	0.31	0.27	0.194	0.387	0.131	0.212	0.204	0.172	0.081	0.173	0.069	0.183	0.205	0.121	0.062	0.128	0	0.015	0	0.09	0.242	0.14	0	0.42841	low
TCGA-BB-4227-01A	0.285	0.155	0.152	0.247	0.094	0.234	0.049	0.169	0.164	0.228	0.18	0.194	0.094	0.046	0.051	0.065	0.027	0.098	0.012	0	0.233	0.115	0.15	0.042	1.94973	high
TCGA-BB-4228-01A	0.375	0.225	0.144	0.216	0.255	0.197	0.199	0.229	0.122	0.144	0.174	0.15	0.082	0.12	0.096	0.098	0.065	0.004	0.09	0	0.127	0.193	0.109	0.03	0.704425	low
TCGA-BB-8596-01A	0.298	0.197	0.239	0.242	0.26	0.295	0.072	0.18	0.168	0.079	0.182	0.224	0.217	0.069	0.068	0.051	0.089	0.106	0.095	0	0.227	0.198	0.076	0	1.39615	high
TCGA-BB-8601-01A	0.084	0.156	0.162	0.078	0.126	0.039	0.106	0.218	0.185	0.208	0.099	0.102	0.104	0.07	0.125	0.005	0.087	0.038	0.088	0	0.194	0.001	0.062	0.047	2.97796	high
TCGA-BB-A5HU-01A	0.258	0.219	0.09	0.184	0.11	0.178	0.125	0.033	0.19	0.167	0.173	0.2	0.137	0.013	0.046	0.057	0.063	0.095	0.127	0.013	0.236	0.168	0.106	0.007	1.81919	high
TCGA-BB-A5HY-01A	0.282	0.137	0.187	0.193	0.084	0.094	0.198	0.167	0.074	0.193	0.169	0.109	0.118	0.081	0.007	0.118	0.052	0.074	0.089	0	0.179	0.179	0.114	0.026	2.33534	high
TCGA-BB-A5HZ-01A	0.242	0.24	0.12	0.145	0.069	0.104	0.041	0.174	0.221	0.212	0.128	0.146	0.129	0.064	0.09	0.061	0.045	0.077	0.104	0.006	0.216	0.055	0.034	0.029	1.32002	high
TCGA-BB-A6UM-01A	0.439	0.336	0.274	0.159	0.287	0.13	0.25	0.19	0.115	0.124	0.133	0.087	0.104	0.132	0.095	0.154	0.023	0	0.05	0	0.18	0.154	0.116	0.074	0.309322	low
TCGA-BB-A6UO-01A	0.354	0.194	0.213	0.223	0.034	0.255	0.143	0.144	0.148	0.142	0.136	0.214	0.053	0.095	0.021	0.087	0.023	0.048	0.095	0	0.231	0.134	0.106	0.043	1.97561	high
TCGA-C9-A47Z-01A	0.338	0.218	0.208	0.241	0.018	0.127	0.204	0.142	0.172	0.188	0.146	0.123	0.107	0.037	0.065	0.08	0.021	0.049	0.064	0	0.234	0.218	0.095	0.062	1.25691	high
TCGA-C9-A480-01A	0.344	0.236	0.219	0.21	0.109	0.104	0.307	0.128	0.209	0.139	0.063	0.073	0.096	0.1	0.065	0.1	0.01	0.072	0.08	0.003	0.215	0.15	0.087	0.072	0.993262	low
TCGA-CN-4722-01A	0.301	0.316	0.173	0.12	0.261	0.129	0.085	0.162	0.186	0.159	0.23	0.131	0.183	0.066	0.099	0.002	0.145	0.064	0.075	0	0.281	0.166	0.057	0.024	0.881406	low
TCGA-CN-4723-01A	0.353	0.253	0.304	0.172	0.174	0.193	0.255	0.215	0.088	0.138	0.19	0.165	0.145	0.075	0.081	0.118	0.044	0.065	0.088	0	0.225	0.208	0.103	0	0.898747	low
TCGA-CN-4725-01A	0.206	0.207	0.189	0.227	0	0.138	0.177	0	0.203	0.195	0.144	0.142	0.115	0	0.052	0.041	0.046	0.115	0.105	0	0.256	0.165	0.096	0	0.975528	low
TCGA-CN-4726-01A	0.294	0.21	0.191	0.227	0	0.284	0.053	0.208	0.204	0.248	0.194	0.186	0.071	0	0.061	0.077	0.092	0.018	0.055	0	0.243	0.128	0.084	0.036	2.7477	high
TCGA-CN-4727-01A	0.079	0.052	0.144	0.128	0.009	0.122	0.072	0.078	0.219	0.3	0.126	0.158	0.113	0.067	0.037	0.027	0.116	0.045	0.058	0.036	0.116	0.055	0.077	0.008	1.096	low
TCGA-CN-4728-01A	0.389	0.276	0.221	0.279	0.251	0.37	0.165	0.159	0.117	0.082	0.19	0.212	0.182	0.085	0.036	0.079	0.095	0.066	0.072	0	0.183	0.229	0.133	0	0.949886	low
TCGA-CN-4729-01A	0.287	0.245	0.217	0.186	0.226	0.108	0.104	0.189	0.212	0.191	0.206	0.102	0.158	0.016	0.095	0.058	0.084	0.095	0.087	0	0.244	0.205	0.144	0	0.630372	low
TCGA-CN-4730-01A	0.223	0.223	0.044	0.217	0	0.169	0.062	0.083	0.221	0.233	0.146	0.152	0.039	0.021	0.084	0.064	0.073	0.115	0.084	0	0.199	0.071	0.084	0	1.07691	low
TCGA-CN-4731-01A	0.302	0.27	0.167	0.206	0	0.15	0.036	0.205	0.214	0.198	0.092	0.161	0.018	0.091	0.079	0.141	0	0.127	0.052	0	0.247	0.083	0.075	0	1.84357	high
TCGA-CN-4733-01A	0.401	0.314	0.28	0.211	0.365	0.224	0.222	0.136	0.054	0.075	0.26	0.077	0.183	0.123	0.126	0.138	0.109	0.078	0.029	0	0.216	0.221	0.109	0	0.863774	low
TCGA-CN-4734-01A	0.439	0.232	0.278	0.197	0.27	0.213	0.315	0.197	0.147	0.112	0.145	0.137	0.131	0.062	0.071	0.095	0.113	0.002	0.053	0	0.269	0.191	0.1	0.003	1.15946	high
TCGA-CN-4735-01A	0.392	0.225	0.262	0.23	0.248	0.223	0.275	0.206	0.206	0.104	0.149	0.164	0.173	0.081	0.1	0.106	0.067	0.082	0.02	0	0.183	0.19	0.086	0.003	0.880993	low
TCGA-CN-4736-01A	0.433	0.313	0.248	0.243	0.274	0.289	0.277	0.136	0.072	0.094	0.13	0.172	0.121	0.099	0.054	0.126	0.056	0.128	0.021	0	0.219	0.238	0.092	0.018	1.02759	low
TCGA-CN-4737-01A	0.334	0.197	0.206	0.228	0.096	0.248	0.085	0.148	0.141	0.15	0.189	0.226	0.145	0.004	0.05	0.063	0.031	0.155	0.081	0	0.235	0.22	0.072	0	1.10889	high
TCGA-CN-4738-01A	0.353	0.267	0.213	0.153	0.292	0.205	0.227	0.163	0.193	0.117	0.176	0.169	0.201	0.108	0.08	0.081	0.101	0.012	0.062	0	0.203	0.191	0.086	0.022	0.702924	low
TCGA-CN-4739-01A	0.395	0.319	0.235	0.067	0.303	0.116	0.123	0.156	0.111	0.162	0.191	0.139	0.195	0.126	0.159	0.066	0.143	0.054	0.068	0	0.167	0.217	0.115	0	0.448262	low
TCGA-CN-4740-01A	0.402	0.251	0.252	0.217	0.22	0.348	0.18	0.091	0.123	0.114	0.176	0.208	0.146	0.143	0.052	0.107	0.067	0.114	0.069	0	0.229	0.211	0.063	0	1.31313	high
TCGA-CN-4741-01A	0.357	0.266	0.192	0.128	0.234	0.146	0.116	0.214	0.109	0.135	0.153	0.131	0.159	0.132	0.118	0.039	0.053	0.022	0.099	0	0.236	0.168	0.104	0.038	0.398847	low
TCGA-CN-4742-01A	0.305	0.215	0.155	0.208	0.072	0.225	0.062	0.114	0.203	0.179	0.201	0.188	0.129	0.029	0.099	0.054	0.079	0.136	0.094	0	0.233	0.208	0.121	0	1.70046	high
TCGA-CN-5355-01A	0.29	0.218	0.113	0.123	0.134	0.157	0.058	0.154	0.217	0.155	0.224	0.182	0.157	0.033	0.096	0.022	0.092	0.122	0.096	0	0.259	0.204	0.083	0	1.08306	low
TCGA-CN-5356-01A	0.318	0.301	0.179	0.088	0.186	0.142	0.076	0.172	0.169	0.162	0.213	0.145	0.124	0.119	0.116	0.032	0.118	0.053	0.108	0	0.219	0.184	0.097	0	1.41973	high
TCGA-CN-5358-01A	0.38	0.32	0.254	0.214	0.332	0.295	0.179	0.149	0.112	0.1	0.256	0.163	0.183	0.069	0.119	0.109	0.112	0.118	0.038	0	0.211	0.23	0.09	0	0.657483	low
TCGA-CN-5359-01A	0.391	0.289	0.268	0.174	0.269	0.314	0.189	0.181	0.113	0.154	0.213	0.172	0.179	0.074	0.067	0.084	0.137	0.057	0.066	0	0.199	0.222	0.083	0	1.07213	low
TCGA-CN-5360-01A	0.388	0.314	0.252	0.178	0.306	0.245	0.204	0.172	0.105	0.083	0.207	0.124	0.191	0.114	0.081	0.11	0.112	0.081	0.041	0	0.214	0.231	0.081	0	0.770098	low
TCGA-CN-5361-01A	0.353	0.256	0.229	0.222	0.03	0.237	0.188	0.248	0.155	0.138	0.165	0.213	0.105	0.095	0.053	0.114	0.026	0	0.078	0	0.22	0.134	0.1	0.064	3.23068	high
TCGA-CN-5363-01A	0.386	0.22	0.203	0.228	0.123	0.228	0.264	0.159	0.118	0.144	0.137	0.154	0.106	0.082	0.088	0.134	0.073	0.109	0.057	0	0.172	0.175	0.081	0.059	2.0438	high
TCGA-CN-5364-01A	0.325	0.226	0.247	0.252	0.159	0.278	0.118	0.158	0.105	0.131	0.097	0.185	0.137	0.081	0.075	0.056	0.066	0.077	0.076	0	0.248	0.195	0.108	0.019	1.34936	high
TCGA-CN-5365-01A	0.391	0.28	0.23	0.242	0.074	0.305	0.299	0.19	0.094	0.173	0.136	0.164	0.04	0.102	0.057	0.128	0.003	0.083	0.035	0	0.219	0.097	0.105	0.068	1.51635	high
TCGA-CN-5366-01A	0.376	0.25	0.236	0.198	0.115	0.24	0.264	0.168	0.111	0.132	0.136	0.177	0.098	0.094	0.063	0.121	0.064	0.083	0.081	0	0.202	0.188	0.102	0.039	1.80829	high
TCGA-CN-5367-01A	0.249	0.179	0.048	0.274	0.02	0.278	0.143	0.165	0.203	0.17	0.154	0.182	0.092	0.056	0.084	0.038	0.058	0.112	0.086	0	0.208	0.109	0.063	0.039	1.72067	high
TCGA-CN-5370-01A	0.427	0.213	0.238	0.245	0.211	0.361	0.235	0.126	0.151	0.124	0.155	0.181	0.143	0.048	0.063	0.101	0.051	0.129	0.057	0	0.191	0.246	0.074	0	1.52087	high
TCGA-CN-5373-01A	0.358	0.301	0.21	0.227	0.246	0.22	0.218	0.152	0.12	0.137	0.186	0.152	0.161	0.057	0.079	0.098	0.112	0.074	0.047	0	0.213	0.219	0.124	0.025	1.2903	high
TCGA-CN-5374-01A	0.403	0.33	0.27	0.091	0.369	0.071	0.248	0.189	0.118	0.062	0.164	0.089	0.204	0.116	0.202	0.071	0.13	0	0.084	0	0.209	0.203	0.07	0.035	0.323603	low
TCGA-CN-6010-01A	0.338	0.235	0.259	0.132	0.184	0.117	0.117	0.243	0.163	0.125	0.173	0.138	0.153	0.135	0.118	0.045	0.11	0.018	0.103	0	0.209	0.215	0.087	0.005	1.6164	high
TCGA-CN-6011-01A	0.396	0.23	0.349	0.198	0.065	0.257	0.244	0.197	0.126	0.195	0.109	0.179	0.069	0.099	0.043	0.097	0.013	0.045	0.049	0	0.201	0.065	0.092	0.079	1.36421	high
TCGA-CN-6012-01A	0.397	0.301	0.306	0.184	0.279	0.245	0.22	0.216	0.101	0.137	0.208	0.144	0.164	0.099	0.095	0.107	0.099	0.021	0.076	0	0.162	0.147	0.099	0.017	1.00723	low
TCGA-CN-6013-01A	0.436	0.287	0.232	0.237	0.341	0.294	0.261	0.145	0.055	0.109	0.164	0.18	0.136	0.097	0.088	0.143	0.092	0.072	0.008	0	0.199	0.228	0.121	0.006	0.603382	low
TCGA-CN-6016-01A	0.343	0.283	0.252	0.228	0.174	0.272	0.091	0.18	0.148	0.086	0.166	0.199	0.145	0.083	0.029	0.057	0.021	0.12	0.072	0	0.267	0.255	0.106	0	2.32772	high
TCGA-CN-6017-01A	0.451	0.305	0.35	0.177	0.334	0.265	0.223	0.142	0.11	0.064	0.192	0.089	0.19	0.117	0.097	0.106	0.077	0.153	0.015	0	0.277	0.208	0.075	0	0.946853	low
TCGA-CN-6018-01A	0.404	0.248	0.226	0.207	0.155	0.308	0.21	0.11	0.105	0.136	0.195	0.161	0.116	0.09	0.056	0.088	0.054	0.112	0.052	0	0.189	0.254	0.107	0.011	2.92695	high
TCGA-CN-6019-01A	0.402	0.263	0.329	0.27	0.279	0.362	0.148	0.204	0.108	0.096	0.158	0.209	0.168	0.073	0.018	0.091	0.054	0.131	0.056	0	0.238	0.196	0.094	0	1.38108	high
TCGA-CN-6020-01A	0.34	0.201	0.174	0.22	0.142	0.276	0.091	0.119	0.179	0.212	0.18	0.182	0.107	0.036	0.049	0.065	0.069	0.056	0.108	0	0.223	0.201	0.135	0	1.51126	high
TCGA-CN-6021-01A	0.29	0.31	0.182	0.143	0.272	0.144	0.092	0.248	0.135	0.204	0.228	0.089	0.105	0.079	0.171	0.035	0.132	0.023	0.092	0	0.264	0.103	0.08	0	0.905676	low
TCGA-CN-6022-01A	0.329	0.206	0.147	0.23	0.094	0.326	0.073	0.061	0.141	0.154	0.195	0.196	0.141	0.036	0.065	0.062	0.03	0.209	0.092	0	0.246	0.231	0.115	0	1.51087	high
TCGA-CN-6023-01A	0.349	0.31	0.265	0.133	0.293	0.235	0.25	0.217	0.049	0.11	0.166	0.129	0.156	0.181	0.084	0.147	0.137	0	0	0	0.126	0.231	0.086	0.043	2.18046	high
TCGA-CN-6024-01A	0.173	0.124	0.118	0.226	0	0.158	0.052	0	0.243	0.218	0.16	0.194	0.088	0	0.043	0.058	0.042	0.089	0.098	0	0.19	0.142	0.047	0	1.8828	high
TCGA-CN-6988-01A	0.26	0.228	0.063	0.169	0.048	0.089	0.093	0.073	0.208	0.243	0.105	0.141	0.031	0.118	0.125	0.013	0.026	0.013	0.095	0	0.181	0.053	0.126	0.027	0.506754	low
TCGA-CN-6989-01A	0.314	0.143	0.195	0.319	0.096	0.358	0.125	0.126	0.205	0.12	0.216	0.219	0.169	0.041	0.052	0.017	0.058	0.106	0.093	0	0.193	0.248	0.074	0	1.83595	high
TCGA-CN-6992-01A	0.265	0.212	0.215	0.201	0.139	0.213	0.067	0.226	0.186	0.149	0.215	0.138	0.171	0.067	0.081	0.054	0.08	0.013	0.135	0	0.202	0.207	0.13	0	0.902028	low
TCGA-CN-6994-01A	0.32	0.252	0.139	0.24	0.148	0.248	0.152	0.166	0.142	0.13	0.176	0.259	0.09	0.05	0.061	0.087	0.065	0.035	0.122	0	0.227	0.145	0.091	0.015	1.38475	high
TCGA-CN-6995-01A	0.448	0.274	0.24	0.194	0.259	0.276	0.273	0.168	0.045	0.114	0.138	0.158	0.08	0.101	0.063	0.134	0.059	0.047	0.043	0	0.227	0.223	0.101	0.028	1.20707	high
TCGA-CN-6996-01A	0.389	0.285	0.229	0.282	0.228	0.263	0.25	0.15	0.109	0.116	0.198	0.124	0.159	0.055	0.08	0.101	0.077	0.132	0.032	0	0.204	0.249	0.091	0.01	0.734995	low
TCGA-CN-6997-01A	0.297	0.162	0.193	0.234	0.13	0.21	0.132	0.245	0.136	0.159	0.158	0.18	0.134	0.112	0.075	0.038	0.087	0.064	0.065	0	0.209	0.1	0.066	0.018	3.10386	high
TCGA-CN-6998-01A	0.373	0.195	0.198	0.252	0.034	0.188	0.215	0.029	0.167	0.192	0.15	0.144	0.068	0.015	0.043	0.095	0.049	0.062	0.057	0	0.206	0.266	0.133	0.047	2.20897	high
TCGA-CN-A497-01A	0.319	0.274	0.224	0.176	0.3	0.143	0.213	0.126	0.161	0.135	0.201	0.121	0.159	0.092	0.089	0.106	0.076	0.038	0.115	0	0.182	0.157	0.071	0.012	0.518017	low
TCGA-CN-A498-01A	0.287	0.238	0.197	0.174	0.151	0.111	0.212	0.152	0.164	0.157	0.154	0.142	0.11	0.015	0.116	0.121	0.058	0.055	0.075	0	0.205	0.2	0.103	0.074	1.00276	low
TCGA-CN-A499-01A	0.436	0.266	0.235	0.212	0.255	0.219	0.306	0.183	0.108	0.136	0.163	0.15	0.131	0.119	0.094	0.147	0.117	0.018	0.026	0	0.183	0.139	0.091	0.048	0.453382	low
TCGA-CN-A49A-01A	0.205	0.143	0.184	0.109	0.091	0.098	0.058	0.071	0.185	0.193	0.124	0.179	0.174	0.084	0.13	0.092	0.05	0	0.128	0	0.207	0.042	0.043	0	1.54195	high
TCGA-CN-A49B-01A	0.409	0.238	0.24	0.261	0.316	0.275	0.269	0.176	0.162	0.121	0.143	0.202	0.136	0.109	0.063	0.124	0.117	0.039	0.032	0	0.174	0.152	0.105	0.019	0.636336	low
TCGA-CN-A49C-01A	0.375	0.275	0.259	0.16	0.226	0.158	0.199	0.155	0.141	0.151	0.139	0.155	0.131	0.122	0.129	0.094	0.011	0	0.064	0	0.216	0.095	0.105	0.095	0.35799	low
TCGA-CN-A63T-01A	0.423	0.286	0.281	0.197	0.261	0.226	0.259	0.149	0.156	0.131	0.15	0.133	0.131	0.11	0.063	0.094	0.092	0.098	0.05	0	0.187	0.135	0.107	0.031	0.674391	low
TCGA-CN-A63U-01A	0.171	0.163	0.158	0.106	0.106	0.043	0.097	0.066	0.156	0.231	0.082	0.113	0.176	0.06	0.151	0.042	0	0.156	0.104	0.022	0.189	0.029	0.083	0.033	0.313207	low
TCGA-CN-A63V-01A	0.319	0.222	0.168	0.107	0.149	0.237	0.064	0.18	0.137	0.181	0.163	0.227	0.134	0.128	0.037	0.042	0.051	0.09	0.108	0	0.24	0.153	0.097	0.038	1.78912	high
TCGA-CN-A63W-01A	0.337	0.271	0.289	0.185	0.068	0.096	0.237	0.199	0.237	0.167	0.026	0.1	0.042	0.127	0.031	0.109	0	0.073	0.074	0	0.216	0.064	0.095	0.062	1.13198	high
TCGA-CN-A641-01A	0.196	0.304	0.021	0.181	0.145	0.107	0.056	0.128	0.215	0.235	0.118	0.127	0.082	0.1	0.108	0	0.043	0.173	0.075	0	0.237	0.038	0.08	0.054	0.809436	low
TCGA-CN-A642-01A	0.418	0.234	0.291	0.164	0.226	0.241	0.298	0.203	0.096	0.12	0.119	0.146	0.097	0.139	0.042	0.109	0.034	0.072	0.038	0	0.199	0.131	0.105	0.057	1.38878	high
TCGA-CN-A6UY-01A	0.472	0.374	0.272	0.183	0.346	0.145	0.27	0.212	0.212	0.079	0.128	0.079	0.16	0.154	0.138	0.138	0.051	0	0.037	0	0.153	0.094	0.105	0.052	0.245014	low
TCGA-CN-A6V3-01A	0.391	0.294	0.29	0.185	0.208	0.109	0.238	0.219	0.206	0.131	0.13	0.085	0.114	0.051	0.103	0.131	0.086	0.031	0.071	0	0.188	0.163	0.067	0.034	0.819365	low
TCGA-CN-A6V6-01A	0.41	0.294	0.239	0.125	0.378	0.177	0.239	0.183	0.15	0.075	0.139	0.102	0.152	0.112	0.105	0.161	0.089	0.04	0.052	0	0.188	0.214	0.082	0.018	0.210984	low
TCGA-CN-A6V7-01A	0.317	0.241	0.214	0.159	0.275	0.162	0.25	0.204	0.086	0.126	0.131	0.132	0.145	0.171	0.103	0.12	0	0	0.079	0	0.179	0.102	0.097	0.101	0.405672	low
TCGA-CQ-5323-01A	0.375	0.287	0.2	0.138	0.253	0.123	0.235	0.194	0.171	0.158	0.184	0.11	0.149	0.041	0.12	0.098	0.11	0.017	0.069	0	0.217	0.156	0.074	0.048	0.284989	low
TCGA-CQ-5324-01A	0.423	0.224	0.284	0.197	0.145	0.207	0.247	0.218	0.106	0.167	0.137	0.148	0.072	0.042	0.073	0.151	0.05	0.012	0.05	0	0.224	0.17	0.115	0.04	1.53301	high
TCGA-CQ-5325-01A	0.413	0.32	0.261	0.232	0.298	0.251	0.233	0.178	0.077	0.089	0.185	0.093	0.142	0.122	0.111	0.118	0.117	0.129	0.014	0	0.24	0.239	0.066	0	0.98401	low
TCGA-CQ-5326-01A	0.336	0.114	0.224	0.297	0	0.347	0.177	0.163	0.199	0.227	0.135	0.205	0.007	0.035	0.027	0.11	0.029	0.097	0.069	0	0.199	0.171	0.136	0	1.7833	high
TCGA-CQ-5327-01A	0.437	0.309	0.254	0.203	0.223	0.304	0.284	0.183	0.087	0.122	0.124	0.152	0.112	0.076	0.088	0.103	0.087	0.091	0.032	0	0.16	0.216	0.102	0.043	1.01918	low
TCGA-CQ-5329-01A	0.339	0.23	0.228	0.24	0.153	0.26	0.28	0.105	0.107	0.125	0.157	0.153	0.121	0.072	0.054	0.114	0.066	0.116	0.052	0	0.189	0.242	0.104	0.052	1.45478	high
TCGA-CQ-5330-01A	0.375	0.249	0.185	0.216	0.158	0.29	0.254	0.068	0.077	0.11	0.147	0.165	0.132	0.115	0.092	0.115	0.047	0.14	0.067	0	0.243	0.251	0.115	0.005	1.79504	high
TCGA-CQ-5331-01A	0.426	0.32	0.295	0.202	0.225	0.271	0.298	0.188	0.11	0.148	0.158	0.102	0.114	0.064	0.106	0.141	0.119	0.017	0.036	0	0.192	0.197	0.094	0.003	0.949303	low
TCGA-CQ-5332-01A	0.317	0.236	0.12	0.212	0.103	0.243	0.128	0.236	0.164	0.137	0.225	0.226	0.11	0.021	0.056	0.076	0.065	0.003	0.144	0	0.208	0.157	0.054	0	2.49747	high
TCGA-CQ-5333-01A	0.42	0.299	0.264	0.261	0.237	0.374	0.29	0.188	0.091	0.105	0.133	0.138	0.11	0.096	0.058	0.111	0	0.168	0.016	0	0.211	0.198	0.106	0.026	0.783212	low
TCGA-CQ-5334-01A	0.41	0.293	0.285	0.216	0.188	0.26	0.298	0.199	0.167	0.122	0.158	0.161	0.121	0.116	0.069	0.124	0.063	0.037	0.058	0	0.168	0.187	0.146	0	1.405	high
TCGA-CQ-6218-01A	0.363	0.271	0.224	0.234	0.184	0.224	0.208	0.176	0.167	0.171	0.156	0.142	0.098	0.058	0.073	0.066	0.096	0.054	0.085	0	0.213	0.153	0.106	0.028	1.53242	high
TCGA-CQ-6219-01A	0.414	0.312	0.249	0.216	0.274	0.287	0.253	0.18	0.069	0.098	0.13	0.142	0.11	0.112	0.069	0.119	0.083	0.072	0.045	0	0.24	0.193	0.098	0.048	1.63649	high
TCGA-CQ-6220-01A	0.374	0.281	0.24	0.233	0.114	0.16	0.24	0.185	0.128	0.171	0.151	0.121	0.09	0.045	0.083	0.105	0.052	0.045	0.064	0	0.213	0.163	0.091	0.07	1.43898	high
TCGA-CQ-6221-01A	0.369	0.148	0.133	0.232	0.044	0.384	0.038	0.07	0.153	0.178	0.226	0.25	0.101	0.138	0.035	0.078	0.049	0	0.057	0	0.206	0.093	0.109	0	2.86258	high
TCGA-CQ-6222-01A	0.438	0.267	0.263	0.272	0.284	0.324	0.229	0.125	0.134	0.109	0.116	0.165	0.125	0.143	0.044	0.118	0.045	0.19	0	0	0.244	0.19	0.051	0.001	0.850291	low
TCGA-CQ-6223-01A	0.39	0.28	0.224	0.194	0.256	0.173	0.165	0.18	0.163	0.189	0.169	0.164	0.103	0.039	0.077	0.086	0.107	0.056	0.056	0	0.227	0.122	0.096	0.021	0.881554	low
TCGA-CQ-6224-01A	0.331	0.192	0.174	0.239	0.038	0.259	0.17	0.138	0.096	0.122	0.18	0.154	0.155	0.066	0.046	0.027	0.029	0.2	0.095	0	0.254	0.243	0.118	0.013	2.14627	high
TCGA-CQ-6225-01A	0.159	0.204	0.059	0.216	0.052	0.132	0.039	0	0.23	0.248	0.113	0.2	0.097	0.054	0.098	0.011	0.001	0.126	0.095	0.017	0.157	0.017	0.043	0	1.27245	high
TCGA-CQ-6227-01A	0.326	0.238	0.185	0.162	0.16	0.15	0.086	0.252	0.217	0.137	0.147	0.136	0.162	0.066	0.082	0.029	0.072	0.154	0.08	0	0.264	0.11	0.057	0.012	1.64996	high
TCGA-CQ-6228-01A	0.256	0.187	0.061	0.225	0.137	0.236	0.093	0.067	0.134	0.175	0.196	0.19	0.122	0.034	0.142	0.036	0.12	0.078	0.112	0.025	0.251	0.053	0.007	0	2.1324	high
TCGA-CQ-6229-01A	0.399	0.293	0.203	0.176	0.12	0.146	0.272	0.174	0.172	0.138	0.119	0.139	0.103	0.071	0.047	0.091	0.026	0.063	0.06	0	0.229	0.213	0.073	0.079	1.50655	high
TCGA-CQ-7063-01A	0.423	0.318	0.241	0.243	0.297	0.232	0.278	0.175	0.08	0.122	0.147	0.121	0.134	0.088	0.065	0.135	0.074	0.029	0.027	0	0.22	0.206	0.133	0.014	0.960576	low
TCGA-CQ-7065-01A	0	0.075	0.186	0.277	0	0.039	0.025	0.068	0.163	0.26	0.115	0.1	0.078	0	0.126	0	0.036	0.134	0.016	0.031	0.026	0.018	0.039	0	0.963683	low
TCGA-CQ-7068-01A	0.465	0.327	0.286	0.193	0.293	0.241	0.309	0.214	0.118	0.104	0.131	0.104	0.117	0.1	0.064	0.164	0.086	0	0.025	0	0.134	0.195	0.104	0.032	1.01264	low
TCGA-CQ-7069-01A	0.213	0.206	0.101	0.222	0.042	0.138	0.102	0.107	0.231	0.192	0.13	0.127	0.115	0.007	0.047	0.061	0.049	0.077	0.117	0.022	0.272	0.138	0.1	0.012	1.60416	high
TCGA-CQ-7071-01A	0.382	0.286	0.252	0.232	0.202	0.202	0.245	0.209	0.172	0.14	0.154	0.142	0.098	0.069	0.083	0.107	0.085	0.037	0.058	0	0.23	0.159	0.087	0.038	1.13764	high
TCGA-CQ-7072-01A	0.248	0.187	0.056	0.281	0.026	0.181	0.054	0.099	0.195	0.139	0.194	0.227	0.176	0.045	0.038	0.049	0.004	0.142	0.114	0.027	0.128	0.149	0.071	0	2.02944	high
TCGA-CQ-A4C6-01A	0.378	0.28	0.222	0.208	0.138	0.178	0.285	0.124	0.119	0.14	0.164	0.109	0.144	0.009	0.071	0.104	0.048	0.118	0.071	0	0.192	0.206	0.147	0.06	1.56214	high
TCGA-CQ-A4C7-01A	0.369	0.211	0.21	0.191	0.105	0.172	0.244	0.114	0.126	0.136	0.132	0.167	0.106	0.074	0.034	0.083	0.005	0.125	0.096	0	0.158	0.244	0.097	0.052	1.68793	high
TCGA-CQ-A4C9-01A	0.257	0.221	0.106	0.238	0.13	0.23	0.079	0.075	0.181	0.166	0.178	0.198	0.1	0.063	0.122	0.063	0.075	0.031	0.123	0.008	0.219	0.112	0.083	0.035	0.80875	low
TCGA-CQ-A4CB-01A	0.289	0.145	0.247	0.272	0.164	0.273	0.178	0.243	0.152	0.16	0.156	0.2	0.164	0.032	0.062	0.08	0.066	0.03	0.127	0	0.195	0.165	0.122	0.037	1.60699	high
TCGA-CQ-A4CD-01A	0.377	0.169	0.254	0.244	0.091	0.301	0.238	0.057	0.118	0.168	0.153	0.158	0.104	0.08	0.066	0.114	0.051	0.048	0	0	0.175	0.17	0.135	0.049	1.45853	high
TCGA-CQ-A4CE-01A	0.37	0.318	0.271	0.136	0.289	0.047	0.263	0.215	0.157	0.183	0.102	0.083	0.126	0.105	0.068	0.096	0.084	0.093	0.052	0	0.265	0.122	0.088	0.042	0.600418	low
TCGA-CQ-A4CG-01A	0.169	0.096	0.226	0.211	0.006	0.209	0.08	0.327	0.149	0.191	0.121	0.173	0.085	0.064	0.065	0.061	0.01	0.025	0.022	0.007	0.137	0.101	0.097	0.044	2.14634	high
TCGA-CQ-A4CH-01A	0.135	0.102	0.048	0.207	0.042	0.244	0.126	0	0.16	0.235	0.179	0.219	0.144	0.028	0.094	0.045	0.073	0.192	0.024	0.018	0.159	0.04	0.056	0	1.28236	high
TCGA-CQ-A4CI-01A	0.32	0.208	0.183	0.159	0.07	0.132	0.19	0.208	0.155	0.182	0.134	0.167	0.099	0.058	0.113	0.056	0.024	0	0.138	0	0.192	0.068	0.078	0.03	1.50346	high
TCGA-CR-5243-01A	0.419	0.275	0.25	0.158	0.301	0.105	0.185	0.168	0.134	0.107	0.229	0.163	0.174	0.111	0.128	0.062	0.121	0	0.07	0	0.189	0.205	0.13	0.021	0.321158	low
TCGA-CR-5247-01A	0.113	0.127	0.058	0.218	0	0.134	0	0.152	0.228	0.199	0.101	0.187	0.082	0.044	0.058	0.032	0.079	0.104	0.026	0.043	0.041	0.101	0.132	0	2.27506	high
TCGA-CR-5248-01A	0.442	0.346	0.264	0.157	0.384	0.223	0.251	0.117	0.063	0.049	0.208	0.086	0.153	0.2	0.162	0.153	0.153	0	0.039	0	0.14	0.218	0.097	0	0.168015	low
TCGA-CR-5249-01A	0.388	0.293	0.257	0.126	0.395	0.091	0.189	0.199	0.093	0.073	0.225	0.062	0.201	0.102	0.25	0.081	0.162	0	0.049	0	0.246	0.191	0.072	0.001	0.365364	low
TCGA-CR-5250-01A	0.371	0.294	0.217	0.094	0.367	0.028	0.072	0.207	0.232	0.11	0.236	0.121	0.18	0.133	0.161	0.012	0.151	0	0.097	0	0.144	0.21	0.108	0	0.233376	low
TCGA-CR-6467-01A	0.438	0.306	0.253	0.125	0.386	0.125	0.233	0.185	0.039	0.067	0.216	0.112	0.188	0.152	0.171	0.131	0.18	0	0.073	0	0.165	0.181	0.082	0	0.22394	low
TCGA-CR-6470-01A	0.396	0.28	0.253	0.156	0.374	0.132	0.221	0.169	0.148	0.081	0.217	0.109	0.199	0.109	0.181	0.127	0.16	0.008	0.008	0	0.202	0.214	0.075	0.014	0.362786	low
TCGA-CR-6471-01A	0.377	0.316	0.188	0.198	0.35	0.173	0.209	0.167	0.135	0.093	0.215	0.129	0.141	0.106	0.106	0.083	0.137	0	0.09	0	0.226	0.176	0.122	0	0.543375	low
TCGA-CR-6472-01A	0.349	0.301	0.145	0.099	0.335	0.069	0.135	0.153	0.124	0.134	0.193	0.13	0.166	0.16	0.148	0.03	0.169	0	0.059	0	0.176	0.102	0.099	0.043	0.82645	low
TCGA-CR-6473-01A	0.32	0.231	0.143	0.124	0.247	0.04	0.179	0.089	0.252	0.142	0.199	0.15	0.184	0.082	0.075	0.056	0.064	0	0.092	0	0.224	0.166	0.128	0.058	0.629085	low
TCGA-CR-6474-01A	0.381	0.241	0.23	0.194	0.149	0.237	0.099	0.198	0.145	0.183	0.194	0.137	0.152	0.055	0.064	0.064	0.042	0.11	0.074	0	0.213	0.259	0.119	0	2.75988	high
TCGA-CR-6477-01A	0.318	0.274	0.16	0.285	0.193	0.296	0.103	0.089	0.12	0.135	0.236	0.197	0.155	0.055	0.077	0.077	0.118	0.078	0.093	0	0.238	0.218	0.114	0	0.719404	low
TCGA-CR-6478-01A	0.443	0.241	0.256	0.258	0.251	0.308	0.271	0.172	0.098	0.153	0.191	0.178	0.122	0.109	0.13	0.125	0.144	0.048	0.034	0	0.196	0.174	0.068	0	1.45648	high
TCGA-CR-6480-01A	0.386	0.237	0.234	0.123	0.346	0.086	0.216	0.195	0.114	0.149	0.187	0.084	0.136	0.127	0.156	0.096	0.149	0	0.025	0	0.173	0.106	0.073	0.064	0.34866	low
TCGA-CR-6481-01A	0.422	0.318	0.272	0.223	0.343	0.242	0.227	0.144	0.078	0.08	0.226	0.113	0.131	0.152	0.215	0.158	0.153	0	0.006	0	0.237	0.194	0.06	0	0.397215	low
TCGA-CR-6482-01A	0.349	0.301	0.244	0.185	0.333	0.201	0.224	0.167	0.093	0.082	0.241	0.094	0.184	0.095	0.211	0.105	0.159	0.008	0.047	0	0.274	0.173	0.119	0	0.29599	low
TCGA-CR-6484-01A	0.385	0.29	0.268	0.222	0.32	0.323	0.222	0.156	0.081	0.113	0.197	0.165	0.147	0.102	0.133	0.146	0.078	0.066	0.039	0	0.224	0.131	0.121	0	0.606377	low
TCGA-CR-6487-01A	0.426	0.307	0.247	0.201	0.391	0.242	0.252	0.158	0.035	0.078	0.218	0.073	0.171	0.178	0.15	0.163	0.14	0.001	0.009	0	0.178	0.231	0.073	0	0.507276	low
TCGA-CR-6488-01A	0.34	0.241	0.233	0.272	0.206	0.328	0.083	0.211	0.147	0.113	0.173	0.188	0.162	0.047	0.048	0.057	0.091	0.161	0.055	0	0.227	0.195	0.079	0	1.03577	low
TCGA-CR-6491-01A	0.322	0.29	0.216	0.171	0.115	0.051	0.206	0.169	0.187	0.151	0.14	0.076	0.073	0.08	0.085	0.106	0.098	0	0.075	0	0.207	0.189	0.129	0.043	1.07506	low
TCGA-CR-6492-01A	0.343	0.233	0.236	0.146	0.187	0.178	0.224	0.166	0.143	0.18	0.157	0.145	0.146	0.098	0.102	0.083	0.079	0.085	0.071	0	0.236	0.129	0.08	0.047	0.697234	low
TCGA-CR-6493-01A	0.289	0.186	0.079	0.229	0	0.222	0.184	0.065	0.158	0.22	0.136	0.132	0.056	0.035	0.074	0.068	0.058	0.047	0.055	0	0.196	0.186	0.168	0.016	1.85228	high
TCGA-CR-7364-01A	0.27	0.255	0.122	0.198	0.109	0.085	0.066	0.108	0.214	0.192	0.206	0.126	0.091	0.075	0.109	0.061	0.059	0.147	0.106	0	0.19	0.221	0.119	0	0.772783	low
TCGA-CR-7365-01A	0.404	0.216	0.185	0.205	0.017	0.217	0.18	0.176	0.185	0.173	0.142	0.193	0.097	0.015	0.06	0.017	0.061	0.089	0.083	0	0.242	0.175	0.088	0	1.40443	high
TCGA-CR-7367-01A	0.339	0.262	0.183	0.184	0.199	0.232	0.122	0.235	0.168	0.151	0.206	0.202	0.154	0.04	0.124	0.06	0.126	0.039	0.078	0	0.215	0.209	0.115	0	1.11212	high
TCGA-CR-7368-01A	0.352	0.261	0.209	0.203	0.294	0.175	0.156	0.181	0.132	0.143	0.2	0.124	0.131	0.096	0.1	0.082	0.121	0.009	0.058	0	0.221	0.233	0.117	0.021	0.462713	low
TCGA-CR-7369-01A	0.33	0.253	0.196	0.172	0.256	0.142	0.097	0.139	0.194	0.122	0.197	0.135	0.124	0.108	0.112	0.042	0.134	0.026	0.09	0	0.228	0.194	0.101	0.001	0.593634	low
TCGA-CR-7370-01A	0.301	0.21	0.183	0.179	0.132	0.205	0.216	0.248	0.147	0.163	0.166	0.139	0.118	0.097	0.08	0.098	0.04	0.044	0.109	0	0.19	0.198	0.105	0.038	1.59168	high
TCGA-CR-7371-01A	0.342	0.278	0.22	0.183	0.275	0.214	0.184	0.206	0.132	0.158	0.203	0.13	0.161	0.077	0.093	0.082	0.148	0.028	0.071	0	0.206	0.208	0.106	0.013	1.3138	high
TCGA-CR-7372-01A	0.322	0.295	0.181	0.186	0.128	0.151	0.071	0.23	0.174	0.16	0.2	0.131	0.127	0.048	0.066	0.049	0.039	0.075	0.074	0	0.246	0.244	0.126	0.007	1.63685	high
TCGA-CR-7373-01A	0.431	0.283	0.287	0.247	0.184	0.256	0.295	0.186	0.102	0.138	0.185	0.129	0.111	0.071	0.059	0.124	0.034	0.065	0.006	0	0.189	0.202	0.16	0.042	1.1636	high
TCGA-CR-7374-01A	0.3	0.322	0.177	0.125	0.312	0.07	0.108	0.214	0.116	0.13	0.236	0.076	0.215	0.106	0.217	0.037	0.138	0	0.101	0	0.177	0.204	0.144	0.003	0.869724	low
TCGA-CR-7376-01A	0.42	0.296	0.239	0.234	0.345	0.337	0.224	0.159	0.069	0.085	0.195	0.184	0.18	0.099	0.085	0.14	0.086	0.082	0.034	0	0.215	0.216	0.098	0	1.02079	low
TCGA-CR-7377-01A	0.373	0.286	0.217	0.191	0.314	0.202	0.205	0.155	0.139	0.063	0.177	0.106	0.199	0.136	0.109	0.078	0.137	0.086	0.061	0	0.24	0.212	0.069	0	0.979724	low
TCGA-CR-7379-01A	0.298	0.228	0.159	0.222	0	0.282	0.094	0.119	0.183	0.239	0.183	0.177	0.082	0.002	0.077	0.075	0.069	0.105	0.085	0	0.21	0.215	0.127	0	1.23726	high
TCGA-CR-7380-01A	0.289	0.278	0.163	0.229	0.177	0.239	0.106	0.184	0.125	0.158	0.22	0.186	0.112	0.065	0.094	0.041	0.114	0.054	0.101	0	0.256	0.157	0.106	0	0.996143	low
TCGA-CR-7382-01A	0.384	0.224	0.218	0.155	0.261	0.33	0.237	0.062	0.075	0.147	0.172	0.174	0.182	0.116	0.096	0.11	0.089	0.119	0.062	0	0.16	0.254	0.11	0	1.53372	high
TCGA-CR-7383-01A	0.341	0.227	0.29	0.245	0.242	0.251	0.209	0.204	0.092	0.112	0.164	0.187	0.154	0.109	0.085	0.099	0.097	0.109	0.053	0	0.26	0.213	0.081	0.009	1.25121	high
TCGA-CR-7385-01A	0.378	0.334	0.245	0.177	0.383	0.206	0.221	0.155	0.053	0.086	0.19	0.106	0.152	0.144	0.15	0.11	0.147	0	0.054	0	0.199	0.208	0.096	0.017	0.41093	low
TCGA-CR-7386-01A	0.388	0.325	0.209	0.255	0.261	0.286	0.225	0.143	0.094	0.089	0.162	0.174	0.157	0.112	0.049	0.109	0.096	0.091	0.046	0	0.24	0.213	0.086	0	1.77833	high
TCGA-CR-7388-01A	0.32	0.301	0.267	0.149	0.316	0.2	0.126	0.191	0.136	0.16	0.236	0.119	0.192	0.087	0.136	0.064	0.136	0.037	0.065	0	0.218	0.195	0.11	0	0.817799	low
TCGA-CR-7389-01A	0.279	0.255	0.214	0.211	0.185	0.199	0.088	0.214	0.142	0.155	0.232	0.128	0.153	0.071	0.138	0.056	0.1	0.055	0.08	0	0.238	0.195	0.113	0.008	1.19718	high
TCGA-CR-7390-01A	0.141	0.188	0.106	0.172	0.106	0.163	0.043	0	0.206	0.274	0.192	0.187	0.122	0	0.059	0.131	0.1	0.036	0.121	0	0.224	0.094	0.04	0	1.21119	high
TCGA-CR-7391-01A	0.393	0.334	0.253	0.215	0.298	0.229	0.208	0.155	0.122	0.104	0.194	0.119	0.188	0.099	0.079	0.095	0.13	0.047	0.049	0	0.256	0.225	0.094	0	0.617442	low
TCGA-CR-7392-01A	0.371	0.312	0.226	0.236	0.274	0.222	0.213	0.132	0.088	0.117	0.24	0.119	0.172	0.086	0.131	0.101	0.138	0.089	0.043	0	0.211	0.227	0.087	0	0.949688	low
TCGA-CR-7393-01A	0.382	0.333	0.243	0.164	0.431	0.206	0.09	0.13	0.155	0.073	0.227	0.07	0.218	0.17	0.112	0.053	0.148	0	0.03	0	0.241	0.215	0.071	0	0.750249	low
TCGA-CR-7394-01A	0.441	0.34	0.258	0.179	0.311	0.224	0.237	0.185	0.106	0.092	0.24	0.098	0.171	0.115	0.116	0.117	0.14	0.024	0.027	0	0.227	0.21	0.067	0	0.547182	low
TCGA-CR-7395-01A	0.424	0.344	0.26	0.24	0.305	0.204	0.248	0.192	0.138	0.123	0.175	0.109	0.147	0.088	0.088	0.128	0.098	0.041	0.041	0	0.207	0.198	0.127	0	0.711386	low
TCGA-CR-7397-01A	0.313	0.248	0.163	0.185	0.245	0.223	0.089	0.137	0.186	0.107	0.188	0.174	0.19	0.087	0.065	0.04	0.114	0.042	0.089	0	0.243	0.256	0.135	0	0.948531	low
TCGA-CR-7398-01A	0.287	0.304	0.104	0.214	0.048	0.187	0.084	0.173	0.129	0.195	0.215	0.191	0.148	0.109	0.057	0.035	0.058	0.103	0.09	0	0.143	0.239	0.151	0	0.871018	low
TCGA-CR-7399-01A	0.397	0.291	0.215	0.206	0.337	0.281	0.25	0.201	0.143	0.119	0.158	0.162	0.131	0.113	0.084	0.138	0.134	0	0.031	0	0.171	0.2	0.101	0	1.36973	high
TCGA-CR-7401-01A	0.285	0.275	0.195	0.217	0.149	0.143	0.092	0.098	0.2	0.15	0.179	0.115	0.156	0.08	0.07	0.035	0.083	0.121	0.102	0	0.258	0.228	0.114	0.006	1.6735	high
TCGA-CR-7402-01A	0.381	0.297	0.231	0.117	0.159	0.058	0.185	0.185	0.13	0.143	0.219	0.077	0.116	0.056	0.145	0.096	0.135	0.053	0.11	0	0.198	0.19	0.098	0.016	0.592576	low
TCGA-CR-7404-01A	0.407	0.272	0.267	0.201	0.339	0.215	0.228	0.17	0.075	0.097	0.204	0.102	0.178	0.155	0.135	0.095	0.146	0	0.056	0	0.192	0.215	0.052	0.018	0.238378	low
TCGA-CV-5430-01A	0.36	0.254	0.255	0.193	0.305	0.216	0.183	0.193	0.078	0.103	0.195	0.229	0.163	0.126	0.132	0.084	0.11	0	0.067	0	0.187	0.187	0.068	0.032	1.13785	high
TCGA-CV-5431-01A	0.43	0.237	0.285	0.18	0.35	0.237	0.24	0.201	0.175	0.09	0.194	0.168	0.175	0.096	0.114	0.141	0.115	0.023	0.029	0	0.167	0.187	0.097	0	0.981111	low
TCGA-CV-5432-01A	0.312	0.256	0.262	0.168	0.124	0.182	0.257	0.259	0.139	0.148	0.122	0.179	0.093	0.072	0.108	0.11	0.073	0.067	0.065	0	0.236	0.117	0.034	0.044	1.32887	high
TCGA-CV-5434-01A	0.319	0.25	0.18	0.239	0.227	0.331	0.113	0.209	0.152	0.102	0.183	0.204	0.172	0.046	0.039	0.022	0.109	0.112	0.087	0	0.224	0.223	0.106	0	1.52137	high
TCGA-CV-5435-01A	0.275	0.135	0.198	0.184	0	0.19	0.006	0.182	0.194	0.19	0.113	0.214	0.077	0.07	0.082	0.036	0.035	0.062	0.055	0	0.255	0.159	0.079	0	1.86485	high
TCGA-CV-5436-01A	0.324	0.269	0.157	0.24	0.116	0.139	0.152	0.149	0.144	0.143	0.159	0.115	0.107	0.065	0.078	0.073	0.077	0.02	0.073	0	0.227	0.21	0.124	0.047	1.45833	high
TCGA-CV-5439-01A	0.337	0.295	0.223	0.14	0.287	0.134	0.234	0.179	0.179	0.13	0.101	0.117	0.062	0.081	0.127	0.106	0.117	0	0.032	0	0.237	0.091	0.098	0.047	1.15281	high
TCGA-CV-5440-01A	0.272	0.191	0.24	0.16	0.056	0.145	0.129	0.14	0.227	0.192	0.048	0.209	0.079	0.06	0.038	0.046	0.017	0.176	0.046	0	0.256	0.121	0.071	0.027	1.59849	high
TCGA-CV-5441-01A	0.361	0.296	0.256	0.149	0.179	0.085	0.121	0.145	0.11	0.159	0.189	0.166	0.14	0.113	0.066	0.028	0.009	0.114	0.064	0	0.238	0.196	0.056	0.051	0.865964	low
TCGA-CV-5442-01A	0.281	0.217	0.072	0.147	0.207	0.084	0.122	0	0.233	0.26	0.052	0.111	0.09	0.083	0.098	0.051	0.032	0	0.115	0.004	0.202	0.113	0.125	0.056	0.840744	low
TCGA-CV-5443-01A	0.436	0.315	0.237	0.244	0.297	0.229	0.246	0.202	0.153	0.111	0.174	0.207	0.123	0.146	0.11	0.148	0.087	0.075	0.044	0	0.109	0.127	0.125	0.014	0.251139	low
TCGA-CV-5444-01A	0.385	0.244	0.212	0.212	0.171	0.297	0.198	0.104	0.09	0.08	0.179	0.169	0.141	0.071	0.068	0.123	0.039	0.146	0.085	0	0.229	0.231	0.076	0.019	1.06282	low
TCGA-CV-5966-01A	0.382	0.182	0.168	0.264	0.085	0.363	0.306	0.105	0.042	0.16	0.148	0.174	0.068	0.105	0.071	0.115	0.024	0.128	0.053	0	0.191	0.19	0.085	0.052	1.51363	high
TCGA-CV-5970-01A	0.372	0.243	0.223	0.211	0.084	0.2	0.16	0.135	0.116	0.188	0.181	0.19	0.096	0.04	0.08	0.048	0.025	0.133	0.076	0	0.227	0.221	0.128	0.032	1.29751	high
TCGA-CV-5971-01A	0.404	0.23	0.319	0.187	0.33	0.232	0.164	0.139	0.158	0.089	0.153	0.126	0.205	0.154	0.05	0.047	0.077	0.154	0.033	0	0.29	0.204	0.064	0	1.44182	high
TCGA-CV-5973-01A	0.236	0.234	0.074	0.253	0.015	0.195	0.102	0.076	0.173	0.218	0.152	0.182	0.058	0.054	0.068	0.013	0.001	0.123	0.066	0	0.199	0.053	0.128	0	1.02063	low
TCGA-CV-5976-01A	0.296	0.175	0.124	0.217	0.013	0.25	0.108	0.101	0.142	0.178	0.137	0.186	0.092	0.004	0.046	0.062	0.026	0.133	0.068	0	0.238	0.165	0.104	0.068	2.13462	high
TCGA-CV-5977-01A	0.272	0.193	0.103	0.245	0.045	0.187	0.235	0.116	0.098	0.202	0.081	0.173	0.067	0.052	0.039	0.1	0.029	0.048	0.058	0	0.209	0.163	0.158	0.089	1.23214	high
TCGA-CV-5978-01A	0.358	0.148	0.217	0.323	0.05	0.406	0.134	0.241	0.11	0.155	0.214	0.265	0.117	0.054	0.085	0.081	0.094	0.056	0.099	0	0.192	0.189	0.061	0	2.01684	high
TCGA-CV-5979-01A	0.267	0.159	0.188	0.225	0	0.208	0.115	0.233	0.179	0.176	0.105	0.147	0.072	0.064	0.05	0.067	0.047	0.102	0.045	0	0.182	0.167	0.105	0.071	2.36167	high
TCGA-CV-6003-01A	0.272	0.16	0.103	0.269	0	0.146	0.183	0.072	0.173	0.194	0.102	0.129	0.076	0.047	0.06	0.075	0.039	0.126	0.047	0	0.226	0.126	0.159	0.045	1.89649	high
TCGA-CV-6433-01A	0.456	0.287	0.25	0.225	0.36	0.224	0.254	0.181	0.166	0.085	0.14	0.135	0.116	0.167	0.085	0.18	0.118	0	0.045	0	0.148	0.14	0.066	0.01	0.302525	low
TCGA-CV-6436-01A	0.49	0.359	0.314	0.227	0.305	0.278	0.263	0.212	0.108	0.135	0.158	0.158	0.044	0.174	0.055	0.144	0.036	0.048	0	0	0.259	0.054	0.011	0	1.01064	low
TCGA-CV-6441-01A	0.251	0.17	0.053	0.168	0	0.18	0.101	0.145	0.16	0.197	0.032	0.19	0.108	0.174	0.082	0	0	0.149	0.052	0	0.194	0.04	0.035	0.044	1.06962	low
TCGA-CV-6933-01A	0.354	0.185	0.216	0.294	0.071	0.412	0.129	0.12	0.137	0.172	0.176	0.24	0.099	0.063	0.06	0.096	0.05	0.054	0.067	0	0.213	0.145	0.046	0	1.55418	high
TCGA-CV-6934-01A	0.398	0.272	0.341	0.18	0.263	0.289	0.228	0.188	0.114	0.065	0.169	0.169	0.172	0.108	0.038	0.083	0.092	0.107	0.067	0	0.221	0.212	0.057	0	1.62801	high
TCGA-CV-6935-01A	0.254	0.239	0.162	0.241	0.094	0.232	0.074	0.232	0.163	0.165	0.177	0.16	0.09	0.02	0.056	0.053	0.058	0.055	0.048	0	0.259	0.217	0.094	0.017	1.70325	high
TCGA-CV-6936-01A	0.377	0.27	0.27	0.146	0.176	0.171	0.284	0.14	0.134	0.152	0.114	0.109	0.084	0.108	0.102	0.131	0.046	0	0.086	0	0.177	0.17	0.145	0.075	0.841621	low
TCGA-CV-6937-01A	0.232	0.243	0.136	0.167	0.182	0.196	0.088	0.232	0.184	0.16	0.095	0.199	0.165	0.05	0.059	0.05	0	0.072	0.096	0	0.266	0.098	0.098	0.058	1.45253	high
TCGA-CV-6938-01A	0.447	0.268	0.237	0.306	0.211	0.366	0.303	0.113	0.1	0.128	0.139	0.158	0.064	0.08	0.08	0.149	0.043	0.031	0.037	0	0.191	0.18	0.096	0.05	1.01216	low
TCGA-CV-6939-01A	0.375	0.268	0.268	0.161	0.294	0.177	0.184	0.163	0.166	0.108	0.162	0.127	0.127	0.106	0.106	0.112	0.136	0.025	0.083	0	0.187	0.176	0.118	0.013	0.645411	low
TCGA-CV-6940-01A	0.337	0.214	0.239	0.176	0.139	0.173	0.085	0.21	0.178	0.164	0.144	0.163	0.123	0.069	0.037	0.048	0.038	0.122	0.079	0	0.232	0.173	0.078	0.023	1.1711	high
TCGA-CV-6941-01A	0.312	0.253	0.16	0.219	0.125	0.188	0.09	0.15	0.191	0.145	0.184	0.198	0.127	0.06	0.075	0.067	0.071	0.086	0.108	0	0.208	0.224	0.1	0.007	1.33281	high
TCGA-CV-6942-01A	0.44	0.307	0.271	0.221	0.277	0.229	0.27	0.163	0.079	0.102	0.19	0.12	0.167	0.113	0.111	0.134	0.101	0.061	0.074	0	0.187	0.19	0.108	0.002	0.597207	low
TCGA-CV-6943-01A	0.434	0.361	0.275	0.208	0.33	0.25	0.234	0.184	0.068	0.067	0.18	0.1	0.164	0.142	0.094	0.133	0.112	0.049	0.047	0	0.227	0.204	0.079	0	0.766728	low
TCGA-CV-6945-01A	0.195	0.211	0.159	0.181	0.067	0.12	0.132	0.085	0.159	0.213	0.095	0.185	0.072	0.051	0.065	0.095	0.061	0.113	0.107	0.002	0.215	0.017	0.06	0.006	1.40961	high
TCGA-CV-6948-01A	0.37	0.23	0.3	0.204	0.229	0.196	0.262	0.206	0.128	0.121	0.13	0.146	0.185	0.133	0.122	0.116	0.131	0	0.058	0	0.174	0.124	0.064	0.056	1.21943	high
TCGA-CV-6950-01A	0.364	0.197	0.185	0.231	0.058	0.205	0.229	0.173	0.201	0.118	0.095	0.14	0.118	0.087	0.056	0.076	0.041	0.129	0.027	0	0.192	0.191	0.091	0.033	3.33932	high
TCGA-CV-6951-01A	0.297	0.184	0.18	0.131	0.066	0.12	0.077	0.123	0.19	0.196	0.156	0.141	0.068	0.055	0.068	0.016	0.049	0.127	0.056	0	0.227	0.24	0.083	0.027	1.71104	high
TCGA-CV-6952-01A	0.366	0.292	0.169	0.23	0.173	0.172	0.245	0.121	0.131	0.163	0.158	0.116	0.104	0.055	0.071	0.076	0.041	0.11	0.039	0	0.226	0.233	0.107	0.063	1.32343	high
TCGA-CV-6953-01A	0.367	0.27	0.179	0.156	0.236	0.201	0.219	0.226	0.18	0.161	0.196	0.149	0.068	0.072	0.115	0.092	0.111	0	0.055	0	0.219	0.117	0.092	0.026	0.624677	low
TCGA-CV-6954-01A	0.3	0.224	0.052	0.229	0.055	0.244	0.216	0.117	0.129	0.176	0.153	0.199	0.053	0.048	0.123	0.088	0.008	0.169	0.11	0	0.196	0.208	0.101	0.04	2.49356	high
TCGA-CV-6955-01A	0.429	0.292	0.264	0.196	0.376	0.145	0.227	0.126	0.172	0.187	0.139	0.089	0.071	0.11	0.087	0.063	0.08	0.055	0.053	0	0.251	0.156	0.075	0	0.678232	low
TCGA-CV-6956-01A	0	0.081	0.099	0.23	0	0.079	0.01	0	0.285	0.251	0.082	0.213	0.092	0.014	0.088	0	0.066	0.168	0	0.03	0	0	0	0	1.15917	high
TCGA-CV-6959-01A	0.36	0.194	0.181	0.217	0.116	0.242	0.198	0.157	0.134	0.174	0.17	0.165	0.135	0.047	0.051	0.065	0.055	0.189	0.048	0	0.192	0.24	0.088	0.03	1.47273	high
TCGA-CV-6960-01A	0	0.051	0.107	0.227	0	0.097	0.092	0	0.224	0.248	0.154	0.171	0.057	0.047	0.086	0.073	0.043	0.157	0	0.011	0.064	0.103	0.104	0	3.09484	high
TCGA-CV-6961-01A	0.421	0.143	0.249	0.143	0.115	0.25	0.137	0.097	0.188	0.162	0.103	0.17	0.12	0.081	0.043	0.072	0.013	0.123	0.047	0	0.24	0.217	0.151	0.013	0.789521	low
TCGA-CV-6962-01A	0.322	0.158	0.064	0.213	0.05	0.205	0.029	0.085	0.107	0.231	0.171	0.173	0.071	0.094	0.073	0.058	0.073	0.031	0.056	0	0.223	0.105	0.065	0.017	2.15801	high
TCGA-CV-7089-01A	0.364	0.227	0.236	0.236	0.135	0.137	0.2	0.174	0.197	0.16	0.139	0.089	0.123	0.075	0.071	0.073	0.078	0.019	0.038	0	0.265	0.156	0.135	0.036	1.0663	low
TCGA-CV-7090-01A	0.367	0.211	0.213	0.292	0.197	0.346	0.211	0.14	0.155	0.14	0.165	0.184	0.117	0.068	0.056	0.088	0.088	0.084	0.095	0	0.207	0.166	0.063	0	1.45487	high
TCGA-CV-7091-01A	0.295	0.32	0.099	0.185	0.209	0.126	0.183	0.111	0.178	0.128	0.144	0.143	0.134	0.075	0.064	0.077	0.105	0.081	0.134	0	0.203	0.22	0.108	0	1.16791	high
TCGA-CV-7095-01A	0.301	0.186	0.201	0.27	0.014	0.192	0.178	0.156	0.127	0.157	0.127	0.163	0.117	0.016	0.083	0.093	0.062	0.085	0.059	0	0.22	0.183	0.118	0.044	1.42426	high
TCGA-CV-7097-01A	0.412	0.163	0.212	0.269	0.072	0.363	0.185	0.094	0.164	0.153	0.166	0.17	0.102	0.032	0.054	0.076	0.039	0.125	0.075	0	0.206	0.25	0.1	0.011	1.89853	high
TCGA-CV-7099-01A	0.399	0.286	0.232	0.223	0.218	0.298	0.248	0.135	0.112	0.145	0.136	0.162	0.053	0.092	0.069	0.135	0.061	0	0.034	0	0.211	0.165	0.096	0.048	0.985311	low
TCGA-CV-7100-01A	0.397	0.219	0.218	0.172	0.242	0.242	0.281	0.196	0.114	0.149	0.14	0.169	0.147	0.12	0.026	0.142	0.07	0.044	0.035	0	0.239	0.104	0.077	0.023	1.05857	low
TCGA-CV-7101-01A	0.394	0.267	0.293	0.183	0.259	0.261	0.142	0.229	0.115	0.142	0.188	0.165	0.102	0.125	0.109	0.083	0.117	0.041	0.023	0	0.218	0.138	0.063	0.001	0.677443	low
TCGA-CV-7102-01A	0.353	0.193	0.153	0.262	0.04	0.3	0.183	0.115	0.146	0.161	0.161	0.23	0.136	0.047	0.044	0.035	0.073	0.124	0.071	0	0.202	0.226	0.087	0.041	1.89	high
TCGA-CV-7103-01A	0.263	0.157	0.157	0.256	0.091	0.186	0.098	0.083	0.142	0.12	0.206	0.211	0.173	0	0.044	0.054	0.072	0.141	0.146	0.008	0.178	0.192	0.037	0	2.24426	high
TCGA-CV-7104-01A	0.379	0.216	0.163	0.278	0.123	0.271	0.219	0.096	0.161	0.135	0.164	0.139	0.123	0.056	0.064	0.053	0.051	0.152	0.059	0	0.22	0.223	0.107	0.027	1.34639	high
TCGA-CV-7177-01A	0.243	0.231	0.054	0.223	0.055	0.245	0.066	0.216	0.127	0.186	0.178	0.207	0.072	0.064	0.084	0.05	0.088	0.12	0.112	0	0.241	0.098	0.067	0	2.34116	high
TCGA-CV-7178-01A	0.37	0.272	0.198	0.174	0.27	0.256	0.187	0.112	0.163	0.095	0.143	0.167	0.147	0.139	0.052	0.072	0.1	0.073	0.095	0	0.201	0.198	0.108	0.008	1.08203	low
TCGA-CV-7180-01A	0.381	0.269	0.241	0.121	0.222	0.025	0.258	0.203	0.162	0.166	0.083	0.09	0.107	0.068	0.098	0.056	0.076	0.035	0.072	0	0.247	0.112	0.093	0.039	1.00309	low
TCGA-CV-7183-01A	0.254	0.232	0.124	0.177	0	0.064	0.119	0.071	0.244	0.244	0.111	0.105	0.035	0.045	0.089	0.101	0.064	0.033	0.097	0	0.267	0.027	0.059	0	1.15257	high
TCGA-CV-7235-01A	0.389	0.241	0.364	0.188	0.25	0.237	0.242	0.206	0.144	0.123	0.136	0.179	0.097	0.106	0.022	0.114	0.065	0.019	0.077	0	0.229	0.211	0.087	0	1.13029	high
TCGA-CV-7236-01A	0.282	0.228	0.153	0.193	0.12	0.185	0.15	0.115	0.145	0.144	0.14	0.162	0.119	0.081	0.052	0.066	0.051	0.09	0.089	0	0.249	0.182	0.135	0.024	2.57719	high
TCGA-CV-7238-01A	0.361	0.281	0.218	0.179	0.227	0.18	0.237	0.149	0.109	0.119	0.154	0.135	0.179	0.118	0.097	0.083	0.085	0.144	0.046	0	0.26	0.19	0.065	0.022	0.753969	low
TCGA-CV-7242-01A	0.398	0.348	0.327	0.109	0.346	0.053	0.208	0.232	0.165	0.09	0.173	0.07	0.176	0.11	0.123	0.084	0.162	0.011	0.075	0	0.168	0.17	0.068	0.019	0.482541	low
TCGA-CV-7245-01A	0.342	0.256	0.192	0.216	0.115	0.082	0.098	0.148	0.157	0.187	0.146	0.108	0.088	0.098	0.029	0.063	0.031	0.101	0.088	0	0.228	0.174	0.078	0	0.700146	low
TCGA-CV-7247-01A	0.164	0.146	0.095	0.165	0.013	0.158	0.084	0.06	0.25	0.186	0.038	0.172	0.105	0.097	0.073	0.052	0.097	0.151	0.047	0	0.234	0.091	0.052	0.019	1.97162	high
TCGA-CV-7248-01A	0.35	0.256	0.31	0.15	0.322	0.198	0.19	0.233	0.141	0.106	0.194	0.125	0.187	0.089	0.128	0.079	0.135	0.045	0.058	0	0.203	0.17	0.057	0	0.630807	low
TCGA-CV-7250-01A	0.382	0.265	0.174	0.19	0.168	0.209	0.224	0.118	0.182	0.195	0.134	0.154	0.084	0.103	0.044	0.089	0.076	0.056	0.025	0	0.183	0.152	0.073	0.074	0.971002	low
TCGA-CV-7252-01A	0.292	0.248	0.255	0.245	0.089	0.207	0.095	0.307	0.14	0.154	0.152	0.152	0.077	0.044	0.054	0.078	0.057	0.043	0.07	0	0.239	0.195	0.148	0.021	1.62972	high
TCGA-CV-7253-01A	0.148	0.151	0.066	0.267	0	0.11	0	0.14	0.183	0.235	0.108	0.11	0.026	0.107	0.098	0.007	0.038	0.061	0.008	0	0.02	0.099	0.114	0.078	1.69477	high
TCGA-CV-7254-01A	0.351	0.292	0.295	0.236	0.35	0.245	0.209	0.217	0.192	0.094	0.141	0.147	0.153	0.144	0.159	0.111	0.095	0.052	0.034	0	0.233	0.131	0.09	0.001	1.3412	high
TCGA-CV-7255-01A	0.183	0.139	0.197	0.187	0.032	0.071	0.083	0.253	0.206	0.239	0.035	0.129	0.079	0.068	0.058	0	0.055	0.126	0.025	0	0.199	0.079	0.055	0.032	1.09725	low
TCGA-CV-7261-01A	0.289	0.219	0.156	0.192	0.152	0.196	0.102	0.289	0.158	0.189	0.168	0.178	0.123	0.108	0.095	0.067	0.073	0.053	0.093	0	0.215	0.094	0.05	0	1.98595	high
TCGA-CV-7263-01A	0.354	0.283	0.159	0.24	0.228	0.305	0.088	0.133	0.111	0.126	0.173	0.165	0.137	0.067	0.088	0.062	0.093	0.161	0.099	0	0.206	0.21	0.111	0.004	0.711463	low
TCGA-CV-7406-01A	0.288	0.124	0.004	0.205	0	0.205	0	0	0.263	0.186	0.141	0.206	0.134	0.062	0.089	0.067	0.077	0.116	0.069	0	0.25	0.084	0.034	0	0.95081	low
TCGA-CV-7407-01A	0.331	0.235	0.245	0.21	0.219	0.251	0.183	0.242	0.111	0.144	0.135	0.109	0.1	0.089	0.057	0.095	0	0.01	0.055	0	0.275	0.265	0.113	0.023	1.14058	high
TCGA-CV-7410-01A	0.368	0.34	0.254	0.147	0.358	0.117	0.229	0.179	0.039	0.047	0.185	0.079	0.227	0.115	0.278	0.11	0.146	0.069	0.057	0	0.266	0.182	0.074	0	0.632684	low
TCGA-CV-7411-01A	0.33	0.296	0.179	0.181	0.208	0.081	0.124	0.172	0.189	0.147	0.167	0.184	0.114	0.059	0.086	0.063	0.105	0.015	0.097	0	0.26	0.151	0.076	0.009	1.12166	high
TCGA-CV-7413-01A	0.345	0.314	0.194	0.237	0.127	0.233	0.155	0.156	0.155	0.136	0.161	0.178	0.112	0.081	0.065	0.084	0.066	0.057	0.078	0	0.197	0.181	0.125	0.03	1.11483	high
TCGA-CV-7415-01A	0.411	0.268	0.222	0.21	0.146	0.23	0.273	0.168	0.087	0.097	0.148	0.154	0.083	0.099	0.068	0.162	0.073	0.051	0.054	0	0.198	0.129	0.098	0.081	1.9428	high
TCGA-CV-7416-01A	0.265	0.169	0.084	0.278	0	0.28	0.076	0.197	0.145	0.151	0.177	0.216	0.059	0.062	0.039	0.07	0.006	0.082	0.126	0.008	0.203	0.156	0.086	0.006	2.31113	high
TCGA-CV-7418-01A	0.364	0.194	0.274	0.151	0.208	0.167	0.284	0.191	0.081	0.129	0.124	0.102	0.163	0.124	0.078	0.129	0.081	0	0.072	0	0.218	0.223	0.096	0.034	2.31944	high
TCGA-CV-7422-01A	0.342	0.176	0.24	0.19	0.183	0.262	0.133	0.24	0.192	0.138	0.161	0.17	0.154	0.077	0.117	0.066	0.101	0.004	0.047	0	0.219	0.183	0.103	0.038	1.63847	high
TCGA-CV-7423-01A	0.196	0.145	0.122	0.237	0.004	0.145	0.078	0	0.21	0.222	0.143	0.146	0.077	0	0.065	0.031	0.025	0.122	0.07	0.003	0.249	0.137	0.106	0	1.29841	high
TCGA-CV-7424-01A	0.383	0.253	0.274	0.155	0.271	0.194	0.208	0.268	0.102	0.108	0.171	0.157	0.189	0.161	0.085	0.098	0.102	0	0.056	0	0.19	0.128	0.091	0.056	1.40301	high
TCGA-CV-7425-01A	0.383	0.314	0.19	0.204	0.18	0.165	0.302	0.192	0.103	0.157	0.157	0.113	0.088	0.044	0.093	0.099	0.084	0	0.088	0	0.229	0.209	0.086	0.05	0.741332	low
TCGA-CV-7427-01A	0.457	0.298	0.294	0.19	0.281	0.227	0.275	0.173	0.101	0.153	0.153	0.133	0.107	0.095	0.076	0.105	0.083	0.031	0.016	0	0.208	0.221	0.108	0.007	0.918275	low
TCGA-CV-7428-01A	0.378	0.317	0.235	0.221	0.263	0.205	0.267	0.188	0.154	0.14	0.132	0.16	0.087	0.111	0.06	0.121	0.06	0.042	0.055	0	0.205	0.167	0.074	0.027	1.09215	low
TCGA-CV-7429-01A	0.338	0.241	0.277	0.158	0.094	0.294	0.203	0.25	0.046	0.149	0.156	0.162	0.076	0.094	0.032	0.13	0.062	0.04	0.047	0	0.231	0.212	0.139	0.019	2.25287	high
TCGA-CV-7430-01A	0.285	0.185	0.072	0.182	0.031	0.142	0.04	0.088	0.195	0.255	0.117	0.151	0.048	0.057	0.098	0.064	0.112	0.04	0.037	0	0.256	0.091	0.08	0	1.3142	high
TCGA-CV-7432-01A	0.303	0.127	0.058	0.278	0	0.229	0.219	0.06	0.134	0.227	0.152	0.191	0	0.106	0.056	0.083	0.042	0.067	0.027	0	0.243	0.074	0.056	0	2.57061	high
TCGA-CV-7433-01A	0.417	0.32	0.269	0.219	0.265	0.328	0.243	0.197	0.095	0.082	0.176	0.171	0.125	0.147	0.064	0.128	0.096	0.023	0.053	0	0.206	0.197	0.128	0	1.49826	high
TCGA-CV-7434-01A	0.376	0.218	0.191	0.235	0.091	0.286	0.239	0.119	0.116	0.185	0.127	0.167	0.016	0.064	0.063	0.129	0.028	0.035	0.083	0	0.214	0.101	0.125	0.057	1.74265	high
TCGA-CV-7435-01A	0.352	0.243	0.22	0.228	0.105	0.295	0.151	0.193	0.167	0.112	0.206	0.189	0.132	0.041	0.076	0.09	0.073	0.055	0.091	0	0.169	0.236	0.122	0	1.7764	high
TCGA-CV-7437-01A	0.257	0.172	0.04	0.276	0.087	0.22	0.124	0.097	0.142	0.2	0.171	0.206	0.067	0.105	0.094	0.091	0.03	0.12	0.023	0	0.193	0.1	0.065	0	3.20844	high
TCGA-CV-7438-01A	0.361	0.221	0.179	0.218	0.116	0.211	0.158	0.17	0.164	0.14	0.176	0.128	0.142	0.078	0.067	0.049	0.021	0.152	0.051	0	0.168	0.255	0.105	0.013	2.64723	high
TCGA-CV-7440-01A	0.289	0.217	0.114	0.186	0.037	0.188	0.165	0.079	0.141	0.208	0.156	0.145	0.088	0.076	0.06	0.061	0.05	0.103	0.085	0	0.206	0.167	0.131	0	1.36417	high
TCGA-CV-7446-01A	0.34	0.214	0.286	0.181	0.138	0.169	0.224	0.266	0.115	0.124	0.165	0.144	0.156	0.078	0.044	0.093	0.068	0.022	0.094	0	0.148	0.167	0.093	0.066	1.36473	high
TCGA-CV-7568-01A	0.364	0.277	0.148	0.173	0.159	0.137	0.154	0.229	0.1	0.098	0.175	0.137	0.171	0.083	0.051	0.04	0.076	0.017	0.105	0	0.219	0.17	0.085	0.046	2.11568	high
TCGA-CV-A45O-01A	0.38	0.249	0.22	0.183	0.103	0.211	0.203	0.185	0.173	0.238	0.13	0.192	0.073	0.033	0.095	0.089	0.003	0.059	0.026	0	0.224	0.133	0.086	0.057	0.802612	low
TCGA-CV-A45P-01A	0.335	0.252	0.193	0.18	0.109	0.034	0.19	0.126	0.166	0.21	0.137	0.103	0.12	0.035	0.045	0.082	0.027	0.034	0.065	0	0.254	0.214	0.124	0.085	0.931392	low
TCGA-CV-A45Q-01A	0.383	0.256	0.25	0.18	0.088	0.199	0.127	0.14	0.162	0.184	0	0.168	0.02	0.124	0.082	0.087	0	0.085	0.028	0	0.244	0	0	0.036	1.26101	high
TCGA-CV-A45R-01A	0.39	0.267	0.24	0.185	0.143	0.243	0.248	0.161	0.122	0.135	0.145	0.164	0.108	0.097	0.046	0.1	0.021	0.099	0.051	0	0.203	0.2	0.109	0.052	0.545614	low
TCGA-CV-A45T-01A	0.397	0.338	0.299	0.175	0.371	0.147	0.266	0.171	0.114	0.068	0.149	0.042	0.185	0.16	0.165	0.118	0.111	0.079	0.013	0	0.226	0.155	0.067	0.019	0.403724	low
TCGA-CV-A45U-01A	0.379	0.297	0.231	0.081	0.33	0.086	0.255	0.205	0.124	0.111	0.135	0.117	0.175	0.098	0.086	0.12	0.064	0.002	0.094	0	0.172	0.141	0.085	0.056	0.757133	low
TCGA-CV-A45V-01A	0.404	0.276	0.256	0.146	0.283	0.203	0.235	0.15	0.165	0.145	0.139	0.193	0.131	0.068	0.052	0.108	0.054	0	0.051	0	0.247	0.161	0.072	0.069	1.06386	low
TCGA-CV-A45W-01A	0.388	0.242	0.323	0.183	0.291	0.257	0.246	0.208	0.13	0.112	0.196	0.147	0.205	0.125	0.139	0.125	0.081	0.029	0.04	0	0.219	0.137	0.02	0.042	0.536597	low
TCGA-CV-A45X-01A	0.25	0.221	0.135	0.202	0.096	0.136	0.079	0.058	0.205	0.264	0.129	0.175	0.102	0.017	0.078	0.066	0.066	0.086	0.042	0	0.217	0.149	0.095	0.039	1.06532	low
TCGA-CV-A45Y-01A	0.377	0.356	0.248	0.219	0.31	0.237	0.233	0.209	0.091	0.069	0.204	0.194	0.181	0.102	0.115	0.118	0.082	0	0.067	0	0.217	0.157	0.117	0.011	0.756264	low
TCGA-CV-A45Z-01A	0.38	0.241	0.271	0.222	0.19	0.24	0.242	0.245	0.098	0.12	0.144	0.164	0.146	0.107	0.071	0.134	0.081	0	0.073	0	0.203	0.171	0.084	0.071	0.991618	low
TCGA-CV-A460-01A	0.423	0.26	0.263	0.21	0.308	0.239	0.214	0.256	0.122	0.112	0.189	0.191	0.182	0.112	0.104	0.108	0.093	0.027	0.036	0	0.171	0.179	0.121	0.005	0.852746	low
TCGA-CV-A461-01A	0.433	0.35	0.298	0.21	0.319	0.238	0.262	0.161	0.083	0.086	0.143	0.118	0.142	0.165	0.074	0.162	0.082	0.023	0.067	0	0.18	0.136	0.051	0.048	0.38779	low
TCGA-CV-A464-01A	0.353	0.287	0.203	0.174	0.223	0.135	0.195	0.145	0.11	0.106	0.148	0.105	0.165	0.1	0.059	0.062	0.039	0.113	0.086	0	0.272	0.186	0.075	0.058	1.22335	high
TCGA-CV-A465-01A	0.21	0.175	0.191	0.14	0.065	0.055	0.095	0.117	0.142	0.215	0.102	0.112	0.126	0.003	0.089	0.054	0.042	0.179	0.079	0	0.276	0.116	0.077	0.044	0.915068	low
TCGA-CV-A468-01A	0.426	0.311	0.295	0.201	0.352	0.225	0.247	0.188	0.11	0.053	0.144	0.098	0.189	0.137	0.069	0.11	0.092	0.07	0.056	0	0.208	0.214	0.078	0.004	0.630007	low
TCGA-CV-A6JD-01A	0.382	0.254	0.269	0.245	0.264	0.237	0.279	0.219	0.028	0.119	0.141	0.126	0.138	0.113	0.057	0.132	0.002	0.064	0.064	0	0.185	0.121	0.073	0.081	1.73548	high
TCGA-CV-A6JE-01A	0.406	0.346	0.37	0.199	0.202	0.201	0.235	0.252	0.089	0.119	0.116	0.133	0.091	0.118	0.05	0.141	0	0.053	0.045	0	0.252	0.098	0.072	0.056	1.53805	high
TCGA-CV-A6JM-01A	0.366	0.279	0.141	0.258	0.106	0.284	0.265	0.22	0.058	0.176	0.056	0.219	0.094	0.091	0.096	0.105	0	0.102	0	0	0.268	0	0.025	0.022	1.37278	high
TCGA-CV-A6JN-01A	0.363	0.293	0.306	0.218	0.202	0.17	0.257	0.239	0.122	0.175	0.135	0.114	0.099	0.066	0.088	0.109	0	0.051	0.019	0	0.282	0.059	0.107	0.085	0.756877	low
TCGA-CV-A6JO-01B	0.44	0.28	0.313	0.18	0.227	0.241	0.306	0.186	0.107	0.104	0.131	0.098	0.091	0.103	0.055	0.13	0.05	0	0.045	0	0.195	0.145	0.116	0.056	1.53012	high
TCGA-CV-A6JT-01A	0.366	0.32	0.295	0.276	0.153	0.174	0.223	0.229	0.107	0.14	0.127	0.111	0.111	0.08	0.046	0.124	0	0.1	0.033	0	0.266	0.136	0.055	0.072	0.985676	low
TCGA-CV-A6JU-01A	0.258	0.127	0.2	0.213	0	0.201	0.153	0	0.234	0.178	0.119	0.175	0.095	0.041	0.106	0.052	0	0.182	0.123	0	0.167	0.108	0.033	0	1.17337	high
TCGA-CV-A6JY-01A	0.272	0.259	0.192	0.111	0.18	0.057	0.103	0.122	0.245	0.203	0.085	0.149	0.099	0.088	0.117	0	0.083	0.043	0.073	0	0.257	0.111	0.073	0.03	0.705536	low
TCGA-CV-A6JZ-01A	0.428	0.298	0.253	0.235	0.278	0.301	0.268	0.226	0.053	0.109	0.147	0.191	0.103	0.121	0.078	0.14	0.087	0.055	0.064	0	0.15	0.198	0.086	0.009	0.831	low
TCGA-CV-A6K0-01B	0.368	0.281	0.205	0.174	0.326	0.2	0.213	0.11	0.191	0.093	0.155	0.081	0.213	0.128	0.087	0.068	0.097	0.08	0.042	0	0.228	0.221	0.102	0.005	0.745806	low
TCGA-CV-A6K1-01A	0.437	0.314	0.291	0.216	0.132	0.203	0.237	0.255	0.112	0.17	0.158	0.168	0.063	0.136	0.09	0.108	0	0.009	0	0	0.226	0.063	0.097	0.061	0.814431	low
TCGA-CV-A6K2-01A	0.376	0.239	0.254	0.171	0.097	0.247	0.23	0.133	0.156	0.179	0.106	0.174	0.097	0.128	0.04	0.098	0.042	0.055	0.042	0	0.195	0.137	0.089	0.072	1.46336	high
TCGA-CX-7085-01A	0.38	0.281	0.261	0.168	0.291	0.287	0.178	0.141	0.134	0.153	0.239	0.133	0.185	0.081	0.118	0.105	0.108	0.117	0.017	0	0.218	0.241	0.098	0	0.694636	low
TCGA-CX-7086-01A	0.328	0.243	0.142	0.153	0.219	0.123	0.175	0.07	0.208	0.219	0.177	0.124	0.064	0.069	0.109	0.067	0.079	0.058	0.057	0	0.219	0.169	0.126	0	1.18619	high
TCGA-CX-7219-01A	0.371	0.187	0.185	0.226	0.155	0.284	0.16	0.139	0.157	0.174	0.202	0.214	0.108	0.057	0.07	0.079	0.054	0.083	0.085	0	0.21	0.22	0.149	0	1.40879	high
TCGA-CX-A4AQ-01A	0.381	0.334	0.239	0.141	0.389	0.155	0.123	0.229	0.107	0.069	0.155	0.13	0.203	0.172	0.26	0.091	0.098	0.004	0.036	0	0.228	0.095	0.105	0	0.34039	low
TCGA-D6-6515-01A	0.401	0.312	0.264	0.232	0.27	0.283	0.244	0.187	0.083	0.109	0.18	0.106	0.163	0.105	0.09	0.107	0.077	0.094	0.029	0	0.23	0.208	0.104	0	0.895048	low
TCGA-D6-6516-01A	0.425	0.353	0.262	0.17	0.203	0.175	0.278	0.198	0.137	0.166	0.154	0.077	0.049	0.098	0.095	0.108	0.065	0	0.047	0	0.219	0.174	0.117	0.009	0.885628	low
TCGA-D6-6517-01A	0.27	0.262	0.118	0.261	0.108	0.213	0.131	0.177	0.122	0.129	0.241	0.161	0.133	0.052	0.125	0.06	0.116	0.04	0.032	0	0.249	0.205	0.152	0.006	1.89815	high
TCGA-D6-6823-01A	0.327	0.215	0.148	0.166	0.042	0.15	0.211	0.085	0.22	0.233	0.179	0.156	0.102	0.028	0.095	0.07	0.076	0.071	0.124	0	0.145	0.143	0.091	0	1.09516	low
TCGA-D6-6824-01A	0.377	0.264	0.241	0.167	0.272	0.299	0.167	0.178	0.179	0.115	0.183	0.18	0.185	0.099	0.089	0.074	0.113	0.06	0.052	0	0.244	0.204	0.079	0	1.05985	low
TCGA-D6-6825-01A	0.414	0.312	0.212	0.197	0.254	0.258	0.271	0.172	0.114	0.122	0.185	0.144	0.151	0.053	0.093	0.102	0.105	0.069	0.048	0	0.222	0.218	0.112	0.009	0.664908	low
TCGA-D6-6826-01A	0.361	0.2	0.161	0.263	0.145	0.347	0.126	0.119	0.116	0.217	0.201	0.232	0.139	0.083	0.106	0.072	0.091	0.08	0.029	0	0.195	0.226	0.124	0.016	0.869579	low
TCGA-D6-6827-01A	0.276	0.223	0.162	0.182	0.159	0.14	0.124	0.268	0.159	0.177	0.154	0.186	0.158	0.094	0.092	0.036	0.035	0.092	0.103	0	0.179	0.201	0.113	0.019	0.574294	low
TCGA-D6-8568-01A	0.329	0.166	0.243	0.171	0.165	0.244	0.129	0.093	0.149	0.217	0.189	0.166	0.143	0.057	0.041	0.073	0.059	0.122	0.097	0	0.242	0.199	0.067	0	1.47583	high
TCGA-D6-8569-01A	0.33	0.196	0.232	0.195	0.084	0.175	0.213	0.155	0.133	0.175	0.164	0.183	0.131	0.045	0.064	0.072	0.054	0.062	0.083	0	0.246	0.211	0.138	0.059	1.11763	high
TCGA-D6-A4Z9-01A	0.323	0.202	0.227	0.188	0.116	0.181	0.238	0.139	0.13	0.172	0.13	0.145	0.146	0.033	0.067	0.096	0.056	0.094	0.056	0	0.238	0.204	0.112	0.082	0.732696	low
TCGA-D6-A4ZB-01A	0.338	0.279	0.295	0.118	0.15	0.106	0.131	0.232	0.153	0.192	0.183	0.142	0.12	0.122	0.096	0.082	0.058	0.088	0.073	0.002	0.219	0.031	0.047	0.043	0.467182	low
TCGA-D6-A6EK-01A	0.441	0.415	0.284	0.263	0.347	0.158	0.276	0.237	0.115	0.097	0.154	0.074	0.132	0.129	0.094	0.112	0.02	0	0.026	0	0.268	0.114	0.084	0.036	0.541665	low
TCGA-D6-A6EM-01A	0.432	0.319	0.296	0.253	0.233	0.317	0.279	0.196	0.114	0.112	0.134	0.122	0.108	0.116	0.096	0.124	0	0.157	0	0	0.238	0.15	0.093	0.036	0.721361	low
TCGA-D6-A6EN-01A	0.468	0.323	0.334	0.241	0.294	0.327	0.328	0.21	0	0.106	0.139	0.132	0.065	0.144	0.069	0.167	0	0.052	0	0	0.209	0.11	0.098	0.037	1.06368	low
TCGA-D6-A6EO-01A	0.28	0.202	0.131	0.181	0.115	0.07	0.164	0.13	0.181	0.223	0.152	0.119	0.103	0.132	0.097	0.057	0.019	0.002	0.136	0	0.19	0.158	0.1	0.054	0.699933	low
TCGA-D6-A6EP-01A	0.328	0.258	0.281	0.106	0.163	0.166	0.132	0.279	0.044	0.124	0.155	0.148	0.149	0.134	0.122	0.097	0	0.081	0.142	0	0.167	0.054	0.035	0.044	1.24784	high
TCGA-D6-A6EQ-01A	0.372	0.344	0.32	0.24	0.222	0.217	0.233	0.249	0.131	0.096	0.146	0.141	0.139	0.073	0.081	0.139	0	0.02	0.034	0	0.296	0.054	0.103	0.058	0.973357	low
TCGA-D6-A6ES-01A	0.364	0.256	0.132	0.257	0	0.267	0.016	0.091	0.164	0.254	0.095	0.212	0.005	0.031	0.095	0.126	0	0	0.041	0.025	0.242	0	0	0	1.399	high
TCGA-D6-A74Q-01A	0.352	0.309	0.281	0.154	0.254	0.114	0.124	0.231	0.128	0.106	0.153	0.074	0.119	0.159	0.099	0.081	0.07	0	0.08	0	0.222	0.18	0.071	0.026	0.339255	low
TCGA-DQ-5624-01A	0.251	0.2	0.07	0.268	0.2	0.14	0.058	0.156	0.122	0.156	0.213	0.141	0.166	0.032	0.07	0.03	0.067	0.157	0.076	0	0.227	0.249	0.099	0.006	1.34449	high
TCGA-DQ-5625-01A	0.422	0.285	0.263	0.213	0.196	0.189	0.282	0.119	0.07	0.112	0.121	0.087	0.077	0.11	0.058	0.128	0.023	0.14	0.071	0	0.234	0.247	0.083	0.03	1.6097	high
TCGA-DQ-5629-01A	0.256	0.253	0.13	0.158	0.08	0.115	0.1	0.203	0.228	0.185	0.13	0.146	0.103	0.101	0.105	0.05	0.092	0	0.073	0	0.222	0.078	0.069	0	2.36238	high
TCGA-DQ-5630-01A	0.413	0.313	0.262	0.201	0.256	0.234	0.273	0.185	0.108	0.07	0.119	0.137	0.109	0.086	0.051	0.114	0.044	0.118	0.038	0	0.227	0.218	0.129	0.055	1.55174	high
TCGA-DQ-5631-01A	0.147	0.058	0.021	0.258	0	0.151	0.08	0.044	0.176	0.171	0.228	0.187	0.138	0.046	0.123	0	0.054	0.12	0.054	0.037	0.134	0.162	0.079	0.009	1.57655	high
TCGA-DQ-7588-01A	0.109	0.17	0.2	0.166	0	0.011	0.156	0.163	0.223	0.27	0	0.123	0	0.028	0.109	0.072	0.077	0	0.049	0	0.27	0	0.063	0	2.27533	high
TCGA-DQ-7591-01A	0.392	0.308	0.225	0.141	0.376	0.095	0.283	0.195	0.068	0.065	0.186	0.168	0.167	0.146	0.201	0.137	0.117	0	0.06	0	0.168	0.188	0.089	0.027	0.326662	low
TCGA-DQ-7592-01A	0.384	0.277	0.196	0.181	0.108	0.203	0.254	0.079	0.105	0.141	0.154	0.18	0.116	0.069	0.038	0.11	0.03	0.101	0.074	0	0.162	0.244	0.118	0.04	1.32786	high
TCGA-F7-7848-01A	0.355	0.323	0.218	0.146	0.286	0.162	0.105	0.168	0.163	0.139	0.212	0.146	0.151	0.131	0.124	0.037	0.154	0.001	0.088	0	0.232	0.175	0.118	0	0.409198	low
TCGA-F7-8298-01A	0.374	0.186	0.217	0.223	0.033	0.224	0.189	0.191	0.177	0.176	0.152	0.153	0.084	0.078	0.053	0.083	0.012	0.062	0.073	0	0.212	0.174	0.131	0.046	1.57731	high
TCGA-F7-8489-01A	0.399	0.302	0.273	0.206	0.33	0.13	0.235	0.192	0.115	0.096	0.192	0.114	0.183	0.074	0.092	0.106	0.09	0.012	0.036	0	0.254	0.186	0.11	0.031	1.02251	low
TCGA-F7-A50G-01A	0.401	0.301	0.237	0.26	0.285	0.171	0.252	0.189	0.154	0.122	0.136	0.142	0.152	0.123	0.075	0.109	0.091	0.085	0.029	0	0.232	0.157	0.035	0.035	0.558292	low
TCGA-F7-A50I-01A	0.395	0.23	0.302	0.175	0.171	0.125	0.244	0.204	0.179	0.15	0.129	0.167	0.156	0.056	0.046	0.083	0.037	0.032	0.061	0	0.215	0.2	0.118	0.033	1.3896	high
TCGA-F7-A50J-01A	0.366	0.299	0.266	0.21	0.227	0.118	0.231	0.225	0.152	0.132	0.137	0.082	0.13	0.081	0.061	0.1	0.081	0.028	0.06	0	0.212	0.148	0.116	0.06	0.873362	low
TCGA-F7-A61S-01A	0.417	0.316	0.231	0.238	0.228	0.196	0.294	0.164	0.095	0.134	0.146	0.096	0.121	0.111	0.102	0.105	0.099	0.051	0.041	0	0.183	0.137	0.1	0.06	1.28347	high
TCGA-F7-A61V-01A	0.276	0.303	0.176	0.162	0.147	0.052	0.156	0.244	0.129	0.158	0.118	0.097	0.123	0.025	0.108	0.078	0.029	0.103	0.105	0	0.252	0.151	0.106	0.063	0.7885	low
TCGA-F7-A620-01A	0.433	0.312	0.299	0.171	0.264	0.186	0.318	0.18	0.054	0.109	0.144	0.09	0.128	0.072	0.105	0.135	0.07	0.072	0.067	0	0.165	0.222	0.091	0.035	0.972713	low
TCGA-F7-A622-01A	0.293	0.244	0.255	0.186	0	0.191	0.173	0.117	0.211	0.245	0.078	0.166	0.036	0.061	0.036	0.089	0	0.147	0.014	0	0.207	0.078	0.119	0.046	1.61819	high
TCGA-F7-A623-01A	0.377	0.254	0.207	0.132	0.283	0.139	0.193	0.123	0.165	0.208	0.18	0.122	0.149	0.069	0.119	0.092	0.082	0	0.063	0	0.177	0.143	0.083	0.053	0.849557	low
TCGA-F7-A624-01A	0.465	0.38	0.299	0.202	0.287	0.351	0.33	0.224	0	0.125	0.148	0.152	0.087	0.228	0.102	0.173	0.064	0.009	0	0	0.135	0.103	0.105	0.03	1.18592	high
TCGA-H7-7774-01A	0.396	0.321	0.209	0.247	0.286	0.115	0.206	0.177	0.153	0.147	0.166	0.096	0.103	0.062	0.087	0.081	0.11	0	0.051	0	0.239	0.183	0.074	0.02	0.632259	low
TCGA-H7-8501-01A	0.464	0.288	0.323	0.223	0.316	0.293	0.307	0.209	0.027	0.072	0.148	0.128	0.138	0.12	0.071	0.154	0.126	0.041	0.008	0	0.143	0.187	0.113	0.03	1.19866	high
TCGA-H7-8502-01A	0.321	0.095	0.103	0.215	0.056	0.27	0.201	0.078	0.145	0.227	0.144	0.218	0.078	0.05	0.055	0.087	0.08	0.08	0.077	0	0.216	0.1	0.095	0	2.29732	high
TCGA-H7-A6C4-01A	0.356	0.268	0.221	0.227	0.183	0.112	0.147	0.144	0.197	0.146	0.16	0.118	0.163	0.053	0.054	0.066	0.083	0.158	0.029	0	0.251	0.172	0.117	0.014	0.965333	low
TCGA-H7-A76A-01A	0.441	0.328	0.299	0.109	0.388	0.296	0.196	0.178	0.098	0.079	0.15	0.154	0.204	0.144	0.16	0.147	0.081	0.063	0.049	0	0.203	0.146	0.051	0	0.167592	low
TCGA-HD-7229-01A	0.395	0.261	0.254	0.214	0.112	0.151	0.286	0.163	0.15	0.178	0.136	0.111	0.085	0.082	0.07	0.117	0.045	0.023	0.045	0	0.203	0.197	0.121	0.052	1.87979	high
TCGA-HD-7753-01A	0.345	0.24	0.274	0.211	0.144	0.149	0.14	0.257	0.165	0.14	0.193	0.121	0.129	0.092	0.045	0.038	0.105	0.053	0.086	0	0.172	0.24	0.137	0	1.82581	high
TCGA-HD-7754-01A	0.298	0.187	0.028	0.221	0.172	0.272	0.083	0.172	0.152	0.161	0.208	0.239	0.128	0.078	0.098	0.025	0.137	0.028	0.056	0	0.198	0.162	0.073	0.004	0.698761	low
TCGA-HD-7831-01A	0.258	0.153	0.072	0.261	0.149	0.224	0.066	0.113	0.139	0.121	0.191	0.223	0.165	0.046	0.035	0.06	0.034	0.134	0.134	0.008	0.184	0.193	0.084	0	2.70132	high
TCGA-HD-7832-01A	0.4	0.137	0.145	0.306	0.061	0.315	0.291	0	0.053	0.177	0.18	0.205	0.03	0.084	0.065	0.114	0.066	0.06	0.087	0	0.195	0.208	0.121	0.006	2.09919	high
TCGA-HD-8224-01A	0.326	0.209	0.167	0.197	0.178	0.278	0.06	0.135	0.176	0.13	0.162	0.185	0.12	0.119	0.06	0.004	0.014	0.13	0.048	0	0.246	0.232	0.093	0.015	0.641903	low
TCGA-HD-8314-01A	0.371	0.239	0.159	0.228	0.257	0.307	0.127	0.178	0.123	0.105	0.185	0.168	0.22	0.099	0.081	0.006	0.099	0.113	0.079	0	0.19	0.215	0.116	0	0.622171	low
TCGA-HD-8634-01A	0.299	0.206	0.121	0.141	0.122	0.122	0.163	0.092	0.186	0.213	0.14	0.133	0.138	0.038	0.093	0.066	0.108	0.044	0.085	0	0.227	0.197	0.126	0.055	0.898805	low
TCGA-HD-8635-01A	0.34	0.23	0.207	0.193	0.244	0.193	0.098	0.179	0.123	0.158	0.149	0.127	0.164	0.088	0.06	0.04	0.075	0.166	0.068	0	0.257	0.192	0.079	0.011	1.07072	low
TCGA-HD-A633-01A	0.315	0.133	0.174	0.177	0	0.237	0.083	0.198	0.155	0.234	0.11	0.196	0.073	0.036	0.041	0.091	0.068	0.012	0.063	0.007	0.244	0.052	0.115	0.022	1.00672	low
TCGA-HD-A634-01A	0.223	0.084	0.088	0.118	0.047	0.125	0	0	0.075	0.237	0.216	0.211	0.164	0.065	0.15	0.045	0.051	0	0.158	0.025	0.18	0	0.101	0	1.37106	high
TCGA-HD-A6HZ-01A	0.348	0.266	0.226	0.254	0.285	0.182	0.245	0.122	0.172	0.118	0.158	0.146	0.168	0.109	0.071	0.11	0.104	0.166	0.039	0	0.306	0.184	0.045	0.001	0.582559	low
TCGA-HD-A6I0-01A	0.474	0.343	0.362	0.216	0.145	0.244	0.277	0.254	0.112	0.148	0.153	0.14	0.074	0.153	0.051	0.1	0	0.028	0	0	0.208	0.088	0.085	0.052	1.20484	high
TCGA-HL-7533-01A	0.434	0.3	0.273	0.136	0.25	0.171	0.258	0.236	0.095	0.116	0.104	0.163	0.103	0.148	0.096	0.148	0.07	0	0.009	0	0.15	0.129	0.105	0.077	0.688189	low
TCGA-IQ-7630-01A	0.335	0.236	0.215	0.258	0.052	0.208	0.178	0.155	0.159	0.146	0.161	0.167	0.077	0.059	0.053	0.078	0.007	0.086	0.1	0	0.188	0.202	0.124	0.072	1.51247	high
TCGA-IQ-7631-01A	0.272	0.128	0.138	0.122	0	0.113	0	0.057	0.206	0.193	0.137	0.172	0.221	0.069	0.064	0	0	0.047	0.172	0.065	0.243	0.013	0.07	0	1.78176	high
TCGA-IQ-7632-01A	0.279	0.269	0.112	0.16	0.123	0	0.12	0.101	0.159	0.194	0.15	0.061	0.103	0.078	0.133	0.047	0.107	0.165	0.057	0.014	0.232	0.055	0.059	0	1.03321	low
TCGA-IQ-A61E-01A	0.382	0.231	0.271	0.249	0.12	0.168	0.252	0.177	0.121	0.126	0.15	0.106	0.097	0.1	0.04	0.071	0.018	0.047	0.087	0	0.228	0.202	0.119	0.078	1.08844	low
TCGA-IQ-A61G-01A	0.303	0.188	0.096	0.234	0.133	0.205	0.178	0.185	0.131	0.211	0.116	0.174	0.092	0.045	0.058	0.053	0.006	0.026	0.048	0	0.212	0.015	0.114	0.026	0.972006	low
TCGA-IQ-A61H-01A	0.332	0.188	0.217	0.18	0.1	0.216	0.145	0.205	0.22	0.147	0.129	0.163	0.124	0.1	0.082	0.094	0.079	0.122	0.087	0	0.176	0.095	0.043	0.046	1.47238	high
TCGA-IQ-A61J-01A	0.335	0.293	0.17	0.244	0.226	0.197	0.204	0.159	0.163	0.097	0.141	0.138	0.165	0.085	0.058	0.075	0.063	0.079	0.077	0	0.244	0.21	0.079	0.041	1.06989	low
TCGA-IQ-A61O-01A	0.272	0.168	0.102	0.202	0.106	0.343	0.098	0.3	0.124	0.107	0.192	0.208	0.161	0.114	0.047	0.074	0.01	0.126	0.126	0	0.179	0.101	0.083	0	2.95742	high
TCGA-IQ-A6SG-01A	0.307	0.17	0.083	0.215	0.125	0.187	0.12	0.103	0.246	0.225	0.163	0.23	0.097	0.06	0.038	0.045	0.063	0.079	0.069	0	0.199	0.102	0.071	0.008	1.31181	high
TCGA-IQ-A6SH-01A	0.394	0.327	0.304	0.247	0.108	0.201	0.309	0.253	0.091	0.14	0.144	0.141	0.039	0.122	0.066	0.14	0	0.056	0.037	0	0.24	0.126	0.111	0.046	0.773962	low
TCGA-KU-A66S-01A	0.31	0.328	0.341	0.138	0.212	0.1	0.106	0.261	0.166	0.128	0.132	0.077	0.101	0.097	0.041	0.04	0.002	0.101	0.103	0.001	0.254	0.148	0.063	0.049	0.798296	low
TCGA-KU-A66T-01A	0.114	0.12	0.13	0.182	0	0.092	0.08	0.157	0.219	0.262	0.025	0.182	0.072	0.043	0.047	0.03	0.079	0.069	0.023	0.037	0.117	0.074	0.093	0.038	1.59524	high
TCGA-KU-A6H7-01A	0.463	0.33	0.259	0.203	0.334	0.224	0.258	0.187	0.131	0.099	0.113	0.147	0.119	0.146	0.089	0.173	0.059	0.027	0.01	0	0.212	0.117	0.061	0.058	0.247968	low
TCGA-KU-A6H7-06A	0.484	0.368	0.293	0.184	0.32	0.127	0.252	0.235	0.152	0.091	0.147	0.129	0.08	0.21	0.18	0.142	0.008	0	0	0	0.202	0.057	0.046	0.069	0.246123	low
TCGA-KU-A6H8-01A	0.396	0.279	0.296	0.107	0.339	0.1	0.155	0.173	0.227	0.098	0.118	0.113	0.181	0.158	0.042	0.057	0.058	0.129	0.065	0	0.235	0.113	0.021	0.013	0.813721	low
TCGA-MT-A51W-01A	0.346	0.225	0.287	0.183	0.146	0.123	0.256	0.154	0.197	0.179	0.064	0.126	0.095	0.112	0.053	0.125	0.053	0	0.068	0	0.238	0.072	0.096	0.08	1.00211	low
TCGA-MT-A51X-01A	0.28	0.278	0.243	0.153	0.13	0.079	0.135	0.288	0.167	0.162	0.107	0.141	0.101	0.08	0.063	0.047	0.02	0.105	0.071	0	0.279	0.118	0.081	0.079	1.42117	high
TCGA-MT-A67A-01A	0.436	0.357	0.297	0.097	0.187	0.136	0.282	0.198	0.093	0.159	0.089	0.124	0.044	0.164	0.045	0.123	0	0.049	0	0	0.26	0.082	0.074	0.083	0.561284	low
TCGA-MT-A67D-01A	0.317	0.281	0.255	0.163	0.272	0.219	0.138	0.231	0.215	0.143	0.175	0.166	0.133	0.082	0.134	0.058	0.105	0.051	0.099	0	0.239	0.126	0.071	0	0.927035	low
TCGA-MT-A67F-01A	0.479	0.319	0.338	0.191	0.368	0.246	0.25	0.195	0.097	0.101	0.153	0.102	0.172	0.144	0.072	0.134	0.11	0.033	0.023	0	0.176	0.197	0.084	0	0.792571	low
TCGA-MT-A7BN-01A	0.433	0.273	0.297	0.248	0.347	0.317	0.228	0.206	0.154	0.086	0.149	0.176	0.163	0.154	0.091	0.136	0.019	0.038	0.007	0	0.197	0.037	0.033	0.06	0.95874	low
TCGA-MZ-A5BI-01A	0.4	0.31	0.321	0.191	0.356	0.17	0.217	0.193	0.124	0.095	0.178	0.062	0.146	0.138	0.154	0.155	0.074	0	0.035	0	0.232	0.186	0.148	0	0.267555	low
TCGA-MZ-A6I9-01A	0.348	0.259	0.277	0.099	0.293	0.069	0.174	0.21	0.163	0.136	0.175	0.102	0.177	0.119	0.193	0.052	0.071	0	0.061	0	0.197	0.073	0.049	0.089	0.35202	low
TCGA-MZ-A7D7-01A	0.241	0.156	0.218	0.107	0.104	0.077	0.092	0.195	0.221	0.189	0.063	0.169	0.049	0.099	0.053	0.09	0.066	0.029	0.075	0	0.238	0.035	0.053	0.086	2.90034	high
TCGA-P3-A5Q5-01A	0.445	0.313	0.245	0.267	0.37	0.349	0.229	0.155	0.034	0.065	0.145	0.109	0.136	0.186	0.136	0.148	0.072	0.006	0.059	0	0.218	0.24	0.029	0.008	0.108449	low
TCGA-P3-A5Q6-01A	0.216	0.213	0.093	0.278	0.069	0.204	0.189	0.171	0.115	0.139	0.12	0.188	0.135	0.028	0.056	0.093	0.08	0.073	0.133	0.017	0.255	0.016	0.066	0	2.81293	high
TCGA-P3-A5QA-01A	0.278	0.165	0.212	0.162	0.039	0.093	0.098	0.218	0.162	0.153	0.067	0.111	0.101	0.062	0.045	0.084	0	0.168	0.106	0.011	0.198	0.169	0.101	0.061	3.04959	high
TCGA-P3-A5QE-01A	0.412	0.307	0.182	0.12	0.383	0.005	0.218	0.201	0.202	0.071	0.176	0.041	0.223	0.138	0.122	0.077	0.152	0	0.06	0	0.171	0.207	0.119	0.007	0.306277	low
TCGA-P3-A5QF-01A	0.364	0.22	0.127	0.249	0.192	0.259	0.253	0.115	0.111	0.158	0.107	0.156	0.071	0.157	0.058	0.095	0.053	0	0.056	0	0.25	0.087	0.069	0.051	0.577789	low
TCGA-P3-A6SW-01A	0.428	0.305	0.344	0.172	0.349	0.184	0.242	0.216	0.165	0.117	0.155	0.163	0.141	0.138	0.126	0.122	0.092	0.017	0.036	0	0.134	0.099	0.028	0.044	0.116737	low
TCGA-P3-A6SX-01A	0.305	0.26	0.196	0.123	0.086	0.067	0.08	0.172	0.265	0.185	0.092	0.109	0.118	0.07	0.079	0.065	0.026	0.1	0.051	0	0.2	0.062	0.018	0.031	1.79251	high
TCGA-P3-A6T0-01A	0.284	0.187	0.174	0.215	0.01	0.115	0.087	0.278	0.209	0.197	0.047	0.153	0.068	0.074	0.038	0.054	0.022	0.029	0.052	0	0.213	0.15	0.097	0.058	1.72127	high
TCGA-P3-A6T2-01A	0.346	0.217	0.131	0.229	0.063	0.198	0.161	0.138	0.161	0.151	0.152	0.173	0.081	0.096	0.03	0.062	0.04	0.001	0.083	0	0.136	0.202	0.142	0.075	1.56279	high
TCGA-P3-A6T3-01A	0.236	0.193	0.116	0.252	0.03	0.126	0.125	0.099	0.164	0.237	0.061	0.164	0.022	0.003	0.053	0.056	0.056	0.097	0.062	0	0.195	0.149	0.103	0.009	1.61126	high
TCGA-P3-A6T4-01A	0.284	0.257	0.127	0.142	0.149	0.075	0.169	0.183	0.248	0.218	0.15	0.132	0.153	0.048	0.064	0.021	0.087	0.098	0.061	0	0.244	0.036	0.034	0.015	1.23916	high
TCGA-P3-A6T5-01A	0.276	0.237	0.184	0.273	0.174	0.208	0.094	0.162	0.132	0.187	0.115	0.174	0.1	0.061	0.051	0.07	0	0.123	0.111	0	0.272	0.118	0.093	0.037	1.26634	high
TCGA-P3-A6T6-01A	0.215	0.216	0.032	0.106	0.156	0.079	0.121	0.11	0.162	0.222	0.045	0.159	0.153	0.162	0.077	0.026	0	0.046	0.149	0.036	0.195	0	0.008	0.065	0.360876	low
TCGA-P3-A6T7-01A	0.367	0.201	0.239	0.154	0.087	0.11	0.254	0.074	0.183	0.213	0.047	0.183	0.089	0.063	0.074	0.111	0.042	0.06	0.059	0	0.234	0.115	0.097	0.053	1.1038	low
TCGA-P3-A6T8-01A	0.212	0.094	0.175	0.236	0.031	0.061	0.091	0.14	0.17	0.179	0.146	0.142	0.157	0.061	0.022	0.066	0.037	0.17	0.122	0.018	0.14	0.141	0.074	0	1.59034	high
TCGA-QK-A64Z-01A	0.274	0.219	0.214	0.183	0.074	0.197	0.213	0.163	0.15	0.212	0.044	0.19	0.085	0.1	0.118	0.132	0.008	0.025	0.059	0	0.222	0.049	0.103	0.102	1.63382	high
TCGA-QK-A652-01A	0.347	0.284	0.191	0.202	0.277	0.138	0.188	0.172	0.109	0.133	0.15	0.114	0.181	0.068	0.08	0.058	0.118	0.166	0.044	0	0.23	0.198	0.086	0.036	0.767932	low
TCGA-QK-A6IF-01A	0.365	0.306	0.23	0.102	0.424	0.073	0.24	0.207	0.105	0.044	0.192	0.061	0.271	0.107	0.276	0.115	0.127	0	0.057	0	0.169	0.181	0.073	0	0.333393	low
TCGA-QK-A6IG-01A	0.379	0.214	0.295	0.21	0.172	0.21	0.277	0.209	0.044	0.145	0.105	0.123	0.138	0.128	0.036	0.117	0.044	0.107	0.032	0	0.251	0.114	0.084	0.063	1.34653	high
TCGA-QK-A6IH-01A	0.305	0.235	0.151	0.252	0.105	0.267	0.111	0.051	0.147	0.182	0.082	0.216	0.045	0.13	0.047	0.085	0	0.049	0.095	0	0.258	0.045	0.09	0.021	1.35657	high
TCGA-QK-A6II-01A	0.347	0.265	0.324	0.21	0.096	0.169	0.274	0.238	0.178	0.207	0.022	0.142	0.036	0.001	0.049	0.125	0	0.073	0.003	0	0.256	0.132	0.043	0.083	2.19331	high
TCGA-QK-A6IJ-01A	0.323	0.27	0.291	0.208	0.256	0.211	0.205	0.23	0.12	0.178	0.147	0.122	0.154	0.107	0.086	0.102	0	0.048	0.037	0	0.272	0.047	0.107	0.06	0.529365	low
TCGA-QK-A6V9-01A	0.422	0.324	0.239	0.13	0.396	0.074	0.257	0.197	0.073	0.093	0.14	0.116	0.126	0.115	0.171	0.143	0.107	0	0.054	0	0.194	0.165	0.091	0.061	0.219752	low
TCGA-QK-A6VB-01A	0.215	0.2	0.038	0.228	0.023	0.169	0.091	0	0.209	0.253	0.088	0.195	0.024	0.102	0.113	0.092	0.044	0.021	0.088	0	0.192	0	0.051	0.006	1.12722	high
TCGA-QK-A6VC-01A	0.42	0.281	0.261	0.166	0.355	0.15	0.239	0.199	0.121	0.095	0.168	0.146	0.184	0.147	0.1	0.105	0.122	0	0.064	0	0.162	0.162	0.132	0.032	0.88846	low
TCGA-QK-A8Z7-01A	0.3	0.205	0.113	0.135	0.116	0.111	0.105	0.191	0.182	0.171	0.158	0.191	0.152	0.104	0.162	0.029	0.015	0.19	0.097	0	0.188	0	0.009	0	0.666092	low
TCGA-QK-A8Z8-01A	0.368	0.264	0.241	0.116	0.085	0.035	0.173	0.198	0.203	0.244	0.158	0.119	0.094	0.098	0.121	0.06	0.02	0.053	0.057	0	0.162	0.106	0.081	0.105	0.843292	low
TCGA-QK-A8Z9-01B	0.353	0.244	0.153	0.195	0.188	0.245	0.17	0.114	0.097	0.118	0.191	0.172	0.176	0.072	0.075	0.065	0.073	0.122	0.096	0	0.209	0.223	0.091	0.033	1.83195	high
TCGA-QK-A8ZA-01A	0.246	0.191	0.229	0.165	0.096	0.113	0.204	0.136	0.179	0.2	0.139	0.065	0.093	0.094	0.111	0.068	0.043	0.017	0.116	0	0.188	0.134	0.099	0.069	1.69101	high
TCGA-QK-A8ZB-01A	0.314	0.256	0.197	0.202	0.104	0.172	0.147	0.203	0.195	0.158	0.2	0.188	0.086	0.031	0.131	0.08	0.069	0.025	0.09	0.015	0.208	0.132	0.077	0.009	1.22706	high
TCGA-QK-AA3J-01A	0.318	0.288	0.189	0.125	0.245	0.042	0.24	0.096	0.149	0.168	0.125	0.041	0.102	0.163	0.092	0.11	0.037	0.049	0.053	0	0.13	0.163	0.137	0.069	0.792202	low
TCGA-QK-AA3K-01A	0.366	0.268	0.28	0.195	0.262	0.25	0.151	0.141	0.156	0.093	0.151	0.175	0.169	0.185	0.047	0.075	0.048	0.065	0.079	0	0.211	0.125	0.068	0.009	1.95499	high
TCGA-RS-A6TO-01A	0.473	0.251	0.234	0.171	0.166	0.267	0.311	0.192	0.11	0.129	0.135	0.174	0.123	0.083	0.053	0.122	0.051	0.04	0.053	0	0.166	0.153	0.089	0.06	1.72175	high
TCGA-RS-A6TP-01A	0.385	0.264	0.216	0.213	0.206	0.122	0.245	0.208	0.14	0.174	0.08	0.165	0.043	0.123	0.035	0.104	0.02	0	0.04	0	0.137	0.154	0.143	0.088	0.393294	low
TCGA-T2-A6WX-01A	0.45	0.337	0.324	0.201	0.257	0.285	0.306	0.254	0.014	0.121	0.132	0.097	0.09	0.137	0.065	0.175	0.023	0.031	0.015	0	0.235	0.118	0.131	0.032	0.5953	low
TCGA-T2-A6WZ-01A	0.35	0.283	0.298	0.188	0.256	0.12	0.148	0.264	0.137	0.124	0.149	0.075	0.137	0.101	0.143	0.055	0.009	0.094	0.076	0	0.253	0.05	0.053	0.053	0.922135	low
TCGA-T2-A6X0-01A	0.36	0.279	0.232	0.154	0.355	0.184	0.215	0.185	0.17	0.072	0.156	0.126	0.185	0.202	0.111	0.092	0.145	0	0.004	0	0.227	0.144	0.045	0.044	0.355845	low
TCGA-T2-A6X2-01A	0.415	0.276	0.257	0.19	0.178	0.198	0.302	0.165	0.071	0.138	0.121	0.151	0.076	0.113	0.052	0.132	0.044	0.025	0.069	0	0.184	0.203	0.097	0.046	1.05202	low
TCGA-T3-A92M-01A	0.387	0.258	0.235	0.197	0.243	0.207	0.253	0.22	0.084	0.087	0.165	0.153	0.185	0.1	0.107	0.124	0.101	0.04	0.105	0	0.163	0.168	0.132	0.041	1.2122	high
TCGA-T3-A92N-01A	0.347	0.214	0.147	0.219	0.133	0.254	0.304	0.103	0.056	0.174	0.133	0.196	0.078	0.132	0.066	0.126	0.041	0.038	0.024	0	0.202	0.169	0.108	0.074	1.94564	high
TCGA-TN-A7HI-01A	0.446	0.36	0.351	0.176	0.35	0.194	0.277	0.24	0.05	0.074	0.163	0.101	0.155	0.184	0.16	0.145	0.041	0	0.088	0	0.173	0.059	0.076	0.04	0.538024	low
TCGA-TN-A7HJ-01A	0.222	0.259	0.082	0.161	0.094	0.109	0.099	0.163	0.198	0.192	0.195	0.121	0.133	0.039	0.149	0.046	0.071	0.041	0.09	0	0.256	0.091	0.088	0.038	0.719057	low
TCGA-TN-A7HL-01A	0.483	0.381	0.295	0.199	0.363	0.305	0.236	0.198	0.022	0.064	0.134	0.127	0.169	0.202	0.141	0.157	0.076	0	0	0	0.219	0.133	0.082	0.023	0.290095	low
TCGA-UF-A718-01A	0.351	0.282	0.266	0.172	0.252	0.091	0.181	0.228	0.127	0.135	0.173	0.144	0.17	0.088	0.091	0.088	0.088	0.062	0.08	0	0.334	0.136	0.076	0.025	1.46125	high
TCGA-UF-A719-01A	0.291	0.206	0.231	0.182	0.222	0.132	0.2	0.113	0.206	0.249	0.064	0.099	0.074	0.071	0.098	0.074	0.014	0.119	0.023	0	0.168	0.092	0.086	0.098	0.833546	low
TCGA-UF-A71A-01A	0.212	0.176	0.177	0.246	0.067	0.244	0.114	0.202	0.211	0.166	0.111	0.219	0.084	0.039	0.061	0.027	0.036	0.135	0.089	0.002	0.218	0.087	0.032	0.038	2.62147	high
TCGA-UF-A71A-06A	0.026	0.108	0.155	0.236	0	0.185	0.052	0.006	0.202	0.233	0.114	0.224	0.085	0.033	0.08	0.037	0.13	0.059	0.079	0.039	0.144	0	0	0	2.8465	high
TCGA-UF-A71B-01A	0.307	0.226	0.225	0.193	0.128	0.228	0.147	0.194	0.187	0.207	0.161	0.158	0.087	0.056	0.099	0.089	0.084	0.074	0.114	0	0.231	0.126	0.083	0.006	1.23987	high
TCGA-UF-A71D-01A	0.327	0.242	0.128	0.14	0.208	0.09	0.126	0.138	0.173	0.169	0.195	0.11	0.133	0.103	0.176	0.05	0.139	0	0.072	0	0.202	0.097	0.094	0.036	0.484102	low
TCGA-UF-A71E-01A	0.257	0.204	0.124	0.173	0.111	0.114	0.078	0.275	0.143	0.224	0.111	0.103	0.109	0.073	0.136	0.068	0.038	0.02	0.138	0	0.22	0	0.01	0.039	0.805529	low
TCGA-UF-A7J9-01A	0.346	0.201	0.211	0.185	0.08	0.273	0.134	0.244	0.151	0.149	0.184	0.172	0.142	0.12	0.01	0.093	0.008	0.065	0.111	0	0.163	0.181	0.042	0.016	1.79532	high
TCGA-UF-A7JA-01A	0.319	0.235	0.209	0.161	0.171	0.099	0.124	0.125	0.144	0.166	0.123	0.17	0.14	0.149	0.065	0.071	0	0.022	0.151	0.003	0.258	0.03	0.09	0.005	1.16409	high
TCGA-UF-A7JC-01A	0.209	0.185	0.201	0.197	0.052	0.096	0.091	0.164	0.209	0.225	0.065	0.193	0.058	0.055	0.08	0.056	0.083	0.032	0.015	0	0.216	0.088	0.095	0.035	1.19846	high
TCGA-UF-A7JD-01A	0.317	0.171	0.225	0.152	0.115	0.202	0.118	0.178	0.19	0.135	0.179	0.156	0.135	0.08	0.04	0.055	0	0.211	0.094	0	0.196	0.154	0.051	0	2.43302	high
TCGA-UF-A7JF-01A	0.335	0.279	0.313	0.225	0.199	0.246	0.154	0.24	0.125	0.128	0.148	0.126	0.059	0.176	0.097	0.08	0	0.151	0.011	0	0.226	0.038	0.085	0.048	0.588088	low
TCGA-UF-A7JH-01A	0.385	0.273	0.279	0.169	0.278	0.247	0.231	0.166	0.098	0.097	0.133	0.152	0.144	0.143	0.061	0.096	0.042	0.168	0.074	0	0.247	0.146	0.033	0.021	1.04969	low
TCGA-UF-A7JJ-01A	0.409	0.323	0.246	0.184	0.308	0.248	0.221	0.204	0.101	0.088	0.189	0.189	0.186	0.122	0.076	0.114	0.118	0.051	0.055	0	0.232	0.184	0.052	0.004	0.763028	low
TCGA-UF-A7JK-01A	0.116	0.197	0.133	0.218	0	0.07	0.053	0	0.201	0.222	0	0.168	0.046	0	0.097	0.036	0.045	0.147	0.082	0.021	0.229	0	0.019	0	1.13886	high
TCGA-UF-A7JO-01A	0.427	0.258	0.294	0.307	0.302	0.304	0.288	0.197	0.068	0.123	0.138	0.187	0.16	0.11	0.066	0.152	0.083	0.053	0.029	0	0.196	0.172	0.045	0.016	0.599341	low
TCGA-UF-A7JS-01A	0.416	0.281	0.368	0.248	0.178	0.283	0.203	0.246	0.034	0.15	0.164	0.129	0.095	0.092	0.067	0.092	0.007	0.118	0	0	0.278	0.149	0.073	0.047	0.990502	low
TCGA-UF-A7JT-01A	0.472	0.333	0.335	0.226	0.27	0.336	0.301	0.217	0.069	0.121	0.132	0.135	0.118	0.112	0.068	0.168	0.048	0.057	0.022	0	0.187	0.107	0.064	0.027	0.694803	low
TCGA-UF-A7JV-01A	0.371	0.188	0.199	0.298	0.082	0.33	0.236	0.233	0.107	0.161	0.156	0.236	0.088	0.115	0.011	0.087	0	0.104	0.032	0	0.178	0.212	0.135	0.042	1.23705	high
TCGA-UP-A6WW-01A	0.363	0.286	0.223	0.259	0.232	0.216	0.224	0.231	0.264	0.106	0.145	0.167	0.149	0.152	0.12	0.07	0.061	0.01	0.032	0	0.138	0.102	0.114	0.061	0.266383	low
TCGA-WA-A7GZ-01A	0.114	0.113	0.137	0.224	0.029	0.142	0.137	0	0.199	0.214	0.142	0.171	0.093	0.056	0.08	0.003	0.051	0.208	0.026	0	0.119	0.132	0.093	0.048	1.24282	high
TCGA-WA-A7H4-01A	0.314	0.218	0.185	0.191	0.031	0.159	0.067	0.179	0.179	0.116	0.182	0.163	0.182	0.06	0.057	0.049	0.019	0.147	0.135	0	0.205	0.23	0.119	0.042	1.63925	high
List of CIBERSORT score in the indicated groups
ID	Macrophages_M0	Macrophages_M1	Macrophages_M2	T_cells_CD8	T_cells_CD4_memory_resting	T_cells_follicular_helper	Plasma_cells	B_cells_naive	Mast_cells_activated	T_cells_regulatory__Tregs	Mast_cells_resting	T_cells_CD4_memory_activated	T_cells_CD4_naive	Dendritic_cells_activated	Dendritic_cells_resting	NK_cells_resting	NK_cells_activated	Monocytes	B_cells_memory	Neutrophils	Eosinophils	T_cells_gamma_delta
TCGA-IQ-7631-01A	0.615048	0.00873194	0.178094	0.0159429	0.00497394	0.0269029	0.019569	0	0.0429849	0.0454754	0	0	0.00663439	0	0	0.0176162	0	0	0.0180262	0	0	0
TCGA-CQ-6221-01A	0.260848	0.00517825	0.559074	0.00768303	0.0182716	0	0	0	0.054256	0	0	0.032925	0.00792717	0.00100442	0	0.0196563	0.00930399	0.0206796	0.0031927	0	0	0
TCGA-BA-6868-01B	0.588694	0.0217313	0.0195267	0.0210794	0.0122215	0.00574353	0.0213851	0.0282759	0.0141776	0	0	0	0.113029	0.122922	0	0.0087329	0.0216877	0	0	0.000792698	0	0
TCGA-CQ-5326-01A	0.401477	0.0162405	0.160349	0	0.0296737	0.0077915	0	0	0.312831	0.00311502	0	0	0	0.0181995	0	0.0240201	0	0	0.000143	0.0261597	0	0
TCGA-CV-7102-01A	0.322153	0.107571	0.327289	0.0291165	0.0857629	0.0157266	0.0013703	0.00429294	0	0.010337	0.0265758	0.0046141	0	0	0.0106584	0.022028	0.000604193	0.0319004	0	0	0	0
TCGA-BA-5557-01A	0.561631	0.00827587	0.0835796	0.0197315	0.0269859	0.0165415	0	0.00146633	0.201568	0.0106659	0	0	0	0.0113179	0	0.0186232	0	0	0	0.0396132	0	0
TCGA-CN-5364-01A	0.229788	0.0745498	0.356625	0.030178	0.140549	0.0541676	0	0	0.00663417	0.0119968	0	0	0	0.00387073	0.0276629	0.0221122	0	0	0.0328055	0	0	0.00905993
TCGA-CV-6933-01A	0.636285	0.00865002	0.191903	0.0134631	0.0570919	0.00870544	0.00941728	0.0135288	0	0.0126594	0.0010913	0	0	0.0281348	0.00543686	0.00510566	0.00101491	0.00751258	0	0	0	0
TCGA-IQ-A61O-01A	0.419272	0.027145	0.285472	0.0444262	0	0.0557333	0.00822813	0.00812322	0.0587199	0.046054	0	0.0112768	0	0	0.00584394	0.0253749	0	0	0.00228741	0	0.00204267	0
TCGA-CQ-7072-01A	0.298394	0	0.320483	0.0622865	0.0627508	0.0494471	0.00408844	0	0	0.0443113	0.0157578	0	0	0.0301616	0.0228585	0.035882	0.0286981	0	0.0248808	0	0	0
TCGA-WA-A7GZ-01A	0.39484	0	0.119092	0.0124507	0.126161	0	0	0	0	0	0.0226475	0	0.094	0.183403	0	0	0.034921	0.00620146	0.00628312	0	0	0
TCGA-UF-A7JO-01A	0.179488	0.187187	0.262781	0.129983	0.0419936	0.0798613	0.00405695	0.00118236	0	0.0392135	0	0.0140165	0	0	0.0341426	0.0177238	0.00837144	0	0	0	0	0
TCGA-CV-6954-01A	0.0260029	0.291054	0.189184	0.0770014	0.0263216	0.0690488	0.0120205	0	0	0.0291955	0.0786131	0	0	0	0.143482	0	0.0262907	0.00142225	0.0182963	0.0120676	0	0
TCGA-CV-6938-01A	0.0642209	0.161377	0.271712	0.188617	0	0.0972278	0	0.00581664	0.0179989	0.0362938	0	0.00565171	0	0.0496026	0.0574863	0	0.038161	0	0	0.00583445	0	0
TCGA-CV-7242-01A	0.0590729	0.0642802	0.0902678	0.137447	0.0561447	0.0362042	0.180559	0.137596	0	0.0379258	0.0796973	0.0245117	0	0.0154537	0.00376018	0	0.0555736	0.017144	0	0.00436276	0	0
TCGA-HD-7832-01A	0.103885	0.0749235	0.354426	0.113733	0.0458045	0.0642774	0.00531186	0.00762235	0.0195686	0	0	0.0137967	0	0.16264	0	0	0.0322278	0	0	0.00178371	0	0
TCGA-BB-4217-01A	0	0.00751954	0.0634993	0.0494782	0.18375	0.0933735	0.138529	0.114268	0	0.0624297	0.0105634	0	0	0.016244	0	0	0.00370837	0.0221226	0.234515	0	0	0
TCGA-CV-7410-01A	0.038118	0.0519737	0.14386	0.0593529	0.113603	0.105296	0	0.22596	0	0.103428	0.0220791	0	0	0.00778992	0	0	0.00441166	0.00408977	0.120038	0	0	0
TCGA-CR-7370-01A	0.0420267	0.0843022	0.157195	0.148916	0.00982396	0.12453	0.152091	0.113993	0	0.00829925	0.0323936	0.00132216	0	0.0207095	0.0334783	0	0.0461035	0.0248169	0	0	0	0
TCGA-CV-5432-01A	0.0195295	0.0776509	0.170016	0.105192	0.0239597	0.0428822	0.261089	0.127065	0	0.00694027	0.0394492	0	0	0	0.0575832	0	0.0489311	0.0175154	0	0.00219669	0	0
TCGA-CN-6016-01A	0.354277	0.0407243	0.280259	0.0185361	0.0307589	0.0681114	0.000128399	0.00811952	0	0.0798476	0.0586865	0	0	0	0.00745752	0.0443564	0.00873737	0	0	0	0	0
TCGA-CQ-5330-01A	0.017535	0.185421	0.30194	0.096815	0.191241	0.0134435	0.00771344	0.0297149	0	0.00373246	0.0389171	0	0	0	0.0134447	0.0165135	0.0517185	0.0288028	0	0.00304732	0	0
TCGA-IQ-7632-01A	0.213756	0.0681489	0	0.106763	0.0422333	0.0375722	0.215579	0	0.0341546	0	0	0	0	0.0661989	0	0.0906676	0	0.0179454	0.0659488	0.0410324	0	0
TCGA-CV-7100-01A	0.0583815	0.250822	0.169635	0.218925	0.0604897	0.0995047	0	0	0	0.0204932	0.00645521	0.0307568	0	0.00594514	0.0128565	0.0398681	0	0.017195	0	0.00867221	0	0
TCGA-CR-7397-01A	0.207115	0.149139	0.23787	0.0323138	0.147214	0.0416978	0	0	0	0.0450833	0.0743406	0	0	0	0.0394133	0.0209692	0	0	0.00484364	0	0	0
TCGA-CV-7255-01A	0.686279	0.0102365	0.013823	0	0.0130237	0.0248731	0.0339678	0.144953	0	0.0311299	0.0126409	0	0	0	0	0	0.0156935	0	0	0	0	0.0133796
TCGA-CV-7248-01A	0.15633	0.0305108	0.170548	0.104414	0.0624616	0.0607245	0.142494	0.159085	0.0240709	0.0645389	0	0	0	0	0	0.0248221	0	0	0	0	0	0
TCGA-CQ-6222-01A	0.30603	0.102956	0.218427	0.14069	0	0.0966879	0	0.0133935	0	0.0322713	0.0117693	0.0205148	0	0	0.0287463	0.00532359	0.0209348	0	0.00225538	0	0	0
TCGA-CV-6937-01A	0.449216	0	0.274563	0.042201	0	0.127842	0	0.0135175	0.0540919	0.015817	0	0	0	0.0105448	0	0.0122073	0	0	0	0	0	0
TCGA-BA-6870-01A	0.0807427	0.011974	0.0641326	0.0734537	0.116077	0.0531583	0.162801	0	0	0.0300076	0.0805996	0	0	0.0490068	0.0117157	0	0.0423418	0.0281774	0.174727	0.021085	0	0
TCGA-CN-4737-01A	0.474909	0.0125116	0.241035	0.00436927	0.0464488	0.0912453	0.006856	0	0	0	0.0307342	0	0	0.048712	0	0.00927207	1.08e-05	0.00297159	0.0259559	0.00496803	0	0
TCGA-CN-4736-01A	0.215394	0.151687	0.237879	0.133205	0.023008	0.08055	0.00483685	0.0121074	0	0.0491495	0.0329214	0.00799598	0	0.00299537	0.00554114	0.00938896	0.0333405	0	0	0	0	0
TCGA-CR-7402-01A	0.0203818	0.0348902	0.0760266	0.0894338	0.147331	0.0554262	0.392238	0.0259181	0	0.0106711	0.0177495	0.0214614	0	0.0109592	0.00769772	0.0438762	0.00602352	0.027996	0	0.0119205	0	0
TCGA-CV-5434-01A	0.299503	0.0632215	0.362977	0.0394037	0.109424	0.0213096	0.00703005	0.0164732	0	0.0506975	0.0166755	0.000540556	0	0	0	0.0127446	0	0	0	0	0	0
TCGA-CN-6021-01A	0	0.00244614	0.102979	0.147197	0.0752851	0.0463363	0.19707	0.160888	0.0580369	0.0564133	0	0	0	0.0301803	0.0113942	0.021577	0	0.0500666	0	0.0401309	0	0
TCGA-CV-5977-01A	0.137551	0.33893	0.129641	0.00905621	0.172032	0.0160905	0.0195482	0	0.0581017	0	0	0	0	0.0548766	0.0144663	0	0.049708	0	0	0	0	0
TCGA-DQ-5629-01A	0.101674	0	0.162836	0.037432	0.0101004	0.00499874	0.190453	0.181122	0.0355858	0.00559402	0	0.0346538	0.0120312	0.110413	0	0.0943941	0	0.0187118	0	0	0	0
TCGA-CV-7101-01A	0.0882325	0.0497014	0.173609	0.0607772	0.0433981	0.0365728	0.260226	0.118931	0	0.0182774	0.0405529	0	0	0	0.00464724	0.00589744	0.0448521	0.0543245	0	0	0	0
TCGA-CR-7389-01A	0	0.0045706	0.205834	0.0352972	0.0907715	0.0548466	0.223249	0.155191	0.00751366	0.0375741	0.019904	0.00711631	0	0.033541	0.0504586	0	0	0.060444	0	0.0136879	0	0
TCGA-CV-7235-01A	0.0501959	0.141088	0.260656	0.125364	0.0690597	0.0696124	0.00612764	0.0149811	0	0.0369504	0.0391034	0	0	0.112415	0.0137826	0.0251983	0.021341	0.0141255	0	0	0	0
TCGA-CN-4739-01A	0	0.0230743	0.0916016	0.168985	0.142487	0.0810845	0.239253	0.0252839	0.0245118	0.0328731	0	0	0	0.0134779	0.0135638	0.0258692	0	0.0365583	0.0254871	0.0558892	0	0
TCGA-CN-5355-01A	0.184743	0	0.124137	0.0348236	0.124689	0.0354768	0.194625	0.0796374	0.0646078	0.0237122	0	0	0	0.0196974	0	0.0533876	0	0.0507625	0	0	0.00970102	0
TCGA-CN-4722-01A	0	0.011646	0.175948	0.127946	0.113993	0.0243169	0.21484	0.131942	0	0.0840348	0.0248475	0	0	0	0.0292227	0	0.0156165	0.0378319	0	0.00781443	0	0
TCGA-CN-5356-01A	0.0188869	0.0177296	0.11543	0.0821664	0.0258423	0.103156	0.20688	0.207564	0.0787412	0.0133841	0	0.00383288	0	0.0220742	0	0.0430425	0	0.0529526	0	0.00831725	0	0
TCGA-CV-6003-01A	0.316083	0.0810146	0.174311	0.0414603	0.0655419	0	0.0168381	0	0	0	0.0169066	0	0.0713332	0.149615	0.0138437	0.00631381	0.0444763	0	0.00226202	0	0	0
TCGA-CV-5966-01A	0.0243091	0.0769037	0.389335	0.10248	0.0699596	0.0369273	0.00332609	0	0.0550424	0.00396187	0	0.00332886	0	0.193958	0	0.0108556	0.019539	0.00807623	0	0.00199697	0	0
TCGA-BA-A6D8-01A	0.153306	0	0.236209	0.050332	0	0.066697	0.0491243	0	0.0446879	0.0250008	0	0	0.0645507	0.033045	0.000502711	0.00224762	0.0175268	0.149218	0.107552	0	0	0
TCGA-CV-A6JT-01A	0.115712	0.0245383	0.259667	0.156189	0	0.0838077	0	0	0	0.0713439	0.0200684	0.0146713	0	0	0.118091	0	0.0428071	0.0105168	0.0741592	0.00610821	0.00231939	0
TCGA-BA-A6DG-01A	0.357041	0.0229774	0.266625	0.0681903	0.123869	0.00199739	0	0	0.061537	0.00203802	0	0	0	0	0.00112861	0.0561824	0	0	0.00203884	0.0363747	0	0
TCGA-CQ-A4CD-01A	0.277995	0.246995	0.166573	0.0631347	0.10911	0.00324877	0	0	0.063075	0	0	0	0	0.0364078	0	0.0256371	0	0	0	0.00782329	0	0
TCGA-CQ-A4C7-01A	0.195223	0.176233	0.127055	0.062666	0.087475	0.0951068	0.00543443	0	0.132564	0.0049436	0	0	0	0	0.00461745	0.0880804	0.00307631	0	0.0175246	0	0	0
TCGA-CQ-A4C9-01A	0.124853	0.0134583	0.315404	0.0325569	0.0321649	0.0759626	0.161544	0.124079	0.0411557	0.00854407	0.00857135	0	0	0.0117715	0.000830205	0.0323545	0	0.0167494	0	0	0	0
TCGA-MZ-A6I9-01A	0.0105331	0.0238606	0.0288198	0.0874183	0.0373954	0.0799188	0.345157	0.128867	0.0579512	0.0446273	0	0	0	0	0.0383032	0.0770384	0	0.0325277	0	0.00758164	0	0
TCGA-QK-A6IH-01A	0.407515	0.0130103	0.258091	0.0975695	0	0.092006	0.00982993	0	0.0378239	0	0	0	0	0.0119489	0.00600951	0	0.0435937	0	0.022602	0	0	0
TCGA-BA-A6DA-01A	0.187609	0.0592349	0.229079	0.163571	0	0.0321123	0.221675	0.0125802	0.0171856	0.000433178	0	0	0.0153735	0.00570258	0	0	0.0285265	0	0	0.0269171	0	0
TCGA-D6-A6EP-01A	0	0.0012013	0.284762	0.195476	0	0.0835394	0.283131	0.040325	0	0.0133021	0.0247223	0.0122108	0	0.000226037	0.00100568	0	0.0557786	0	0	0.00432007	0	0
TCGA-BA-A6DL-01A	0.135852	0.0281125	0.0901107	0.107972	0	0.0751248	0.204471	0.0608912	0.0903886	0.0132231	0	0.0317107	0.0270268	0.0263583	0	0.0729408	0.00935634	0.0100754	0	0.0163864	0	0
TCGA-MT-A67D-01A	0.216456	0.037364	0.128256	0.0755506	0.0108154	0.0406958	0.183198	0.10596	0.119755	0.0137418	0	0.0281318	0	0.0173058	0	0.022769	0	0	0	0	0	0
TCGA-P3-A6T6-01A	0.0264294	0.071021	0.141015	0.103251	0	0.180926	0.258193	0	0	0	0.0310967	0	0	0.0695145	0	0	0.0568872	0.0270993	0.0240888	0.0104771	0	0
TCGA-RS-A6TO-01A	0.249452	0.148525	0.294605	0.133023	0	0.0666999	0.00186083	0.00333835	0.0199369	0.00415757	0	0.0499293	0	0	0	0.0227415	0.00573042	0	0	0	0	0
TCGA-D6-A74Q-01A	0.0956927	0.0410803	0.0588478	0.174028	0	0.102223	0.267229	0.0117321	0.0699504	0.0287592	0.0152133	0	0	0.0258614	0	0.036257	0.0393423	0.0304504	0	0.00333268	0	0
TCGA-BB-A6UO-01A	0.326997	0.0454077	0.250223	0.0500928	0.0903457	0.0124371	0	0	0.12225	0	0	0	0	0.03924	0	0.00525248	0.054517	0	0.00303356	0.000204409	0	0
TCGA-CV-A6JO-01B	0.0222217	0.290221	0.146664	0.240621	0	0.164835	0.0047635	0.00771338	0.042577	0.0222034	0	0.00435363	0	0	0.0188924	0.0231243	0.00922348	0.000583044	0	0.00200207	0	0
TCGA-CN-A63U-01A	0.0699079	0.0578196	0.102348	0.0894527	0	0.164007	0.22006	0.0123359	0.0714493	0	0.052819	0	0	0.0431636	0	0.0327782	0.0134871	0.023767	0.0428735	0.0037313	0	0
TCGA-P3-A6T8-01A	0.437728	0	0.0303308	0.00570192	0.139971	0.00804384	0.000572298	0	0.142896	0.00401735	0	0	0	0.076493	0	0.142123	0	0	0	0.00824768	0.00387458	0
TCGA-UF-A7JV-01A	0.485644	0.0345471	0.173406	0.0274054	0.0482021	0.0194938	0	0	0.168678	0.00229081	0	0	0	0	0	0.0216756	0	0	0.0137519	0	0.00490574	0
TCGA-UF-A71D-01A	0.048801	0.0203475	0.126095	0.117239	0.0288019	0.058213	0.285957	0.0987172	0	0.0438432	0.0167149	0.03665	0	0.0316285	0.011122	0.0558347	0	0.0200359	0	0	0	0
TCGA-TN-A7HJ-01A	0.000733068	0.0273201	0.307071	0.0388036	0.110971	0.0667552	0.19022	0.0277944	0	0	0.00895917	0	0	0.0982475	0	0.0449978	0	0.00489107	0.0615751	0.0116615	0	0
TCGA-RS-A6TP-01A	0.101226	0.255679	0.0764531	0.142404	0	0.186138	0	0	0.0226937	0.00882072	0	0	0	0.0850691	0	0	0.116536	0.00355185	0.00142751	0	0	0
TCGA-T2-A6X2-01A	0	0.234076	0.21946	0.230525	0	0.105363	0.0117035	0.00151519	0	0.00915009	0.0354262	0.01694	0	0	0.0224739	0.0561955	0.047792	0.00938059	0	0	0	0
TCGA-UF-A71A-01A	0.345356	0.0112768	0.390856	0.0070373	0.109487	0	0.0312287	0	0	0	0.0277546	0	0.0425928	0.00591643	0.00380015	0.0236276	0	0	0.00106733	0	0	0
TCGA-UF-A7JA-01A	0.455581	0.0442218	0.185452	0.057966	0	0.13555	0.009871	0	0.0164038	0	0	0	0	0	0	0.0181587	0.0170481	0	0.0597479	0	0	0
TCGA-QK-A8Z8-01A	0.0465968	0.0051762	0.0894029	0.0841957	0	0.108064	0.267363	0.0889461	0	0.00968932	0.0436328	0.0168721	0.0136359	0.117159	0	0.0662496	0.0132145	0.0221641	0	0.00763725	0	0
TCGA-QK-A8ZB-01A	0.278452	0.0155551	0.0395216	0.0408376	0.0511855	0.0643952	0.233489	0.123063	0.0817847	0.0193859	0	0	0	0	0.00795985	0.0269429	0	0	0	0.0174277	0	0
TCGA-QK-A6IF-01A	0.0166979	0.064711	0.0805082	0.128455	0.087033	0.205973	0.0729672	0.143949	0.0193954	0.0649822	0	0	0	0.000705709	0.00831048	0	0	0.00379082	0.102521	0	0	0
TCGA-CQ-6229-01A	0.0149732	0.223218	0.187986	0.183074	0	0.117166	0.0309077	0.0113425	0	0.021291	0.0528961	0.0519212	0	0.0315563	0.0494174	0.0151882	0	0.00906219	0	0	0	0
TCGA-CQ-6219-01A	0.0803471	0.23368	0.191371	0.185888	0.011253	0.131349	0.0124916	0.0143398	0	0.0117881	0.0310084	0.000958939	0	0	0.0481874	0.0180325	0.026237	0.00306766	0	0	0	0
TCGA-CV-6953-01A	0.100231	0.034238	0.227566	0.16068	0.0868399	0.0681545	0.173139	0	0.0122967	0.0227109	0.00128033	0.0312243	0	0.0309229	0.00271178	0	0	0.0122319	0.0246822	0.0110916	0	0
TCGA-CV-6939-01A	0.0501756	0.07854	0.191672	0.123051	0.107467	0.130595	0.0818019	0.137095	0	0	0.0244639	0.0122439	0	0.00765476	0.00763032	0	0.0259591	0.0216506	0	0	0	0
TCGA-CV-7434-01A	0	0.199647	0.263438	0.138348	0.181447	0.0285816	0.0084188	0	0.0215509	0	0	0	0	0.0299889	0.00733528	0.0266261	0.0669927	0.0276261	0	0	0	0
TCGA-CV-7433-01A	0.0499192	0.131958	0.202829	0.207376	0.0810371	0.026836	0.00497653	0.0268786	0.00130227	0.037591	0.00305004	0.0288506	0	0.0923744	0.0193258	0.0531914	0.0105324	0.0195961	0	0.00237482	0	0
TCGA-CV-7416-01A	0	0	0.489315	0.0038226	0.15232	0	0.00365588	0	0	0	0.031254	0	0	0.176035	0.0601833	0.00532659	0.0205336	0.0437239	0.0138305	0	0	0
TCGA-CV-7407-01A	0	0.0984676	0.296445	0.056572	0.127853	0.0628929	0.00234628	0	0	0.0484019	0.0475189	0	0	0.0277757	0.0845619	0	0.0624772	0.084687	0	0	0	0
TCGA-CR-6492-01A	0.0203195	0.154591	0.139289	0.0683166	0.0583263	0.0812591	0.127403	0.0956295	0.0478082	0.0188881	0	0.00449215	0	0.0198085	0.018515	0.092118	0	0.0312528	0	0.0219831	0	0
TCGA-F7-7848-01A	0.0351842	0.015555	0.260628	0.120612	0.168738	0.0551485	0.155474	0.0193081	0.00867614	0.00741616	0.00178262	0.0365059	0	0.0183417	0.0193879	0.0141224	0	0.0191755	0.0295466	0.014398	0	0
TCGA-CQ-7068-01A	0.0144757	0.182412	0.144813	0.294719	0	0.125401	0.00600114	0.017473	0.00161349	0.0772589	0	0.0257269	0	0	0.00572612	0.0708788	0.0135336	0.0199677	0	0	0	0
TCGA-CV-7423-01A	0.40386	0.00199927	0.0165563	0.0148111	0.09741	0.0175911	0.000808346	0	0.250732	0	0	0	0.0267117	0.0498748	0	0.103607	0	0	0.00485697	0	0.0111809	0
TCGA-IQ-7630-01A	0.156783	0.038478	0.266985	0.0862894	0.128225	0.0711124	0.00438095	0	0.0824714	0	0	0	0	0.0746711	0.0455744	0.0301387	0.0130653	0	0	0.00182652	0	0
TCGA-CV-7427-01A	0	0.165123	0.21298	0.174464	0.119694	0.0714496	0.00219709	0.0160865	0.0135077	0.00619126	0	0.0444723	0	0.00871695	0.0885223	0.0477285	0.0005238	0.018883	0	0.00946024	0	0
TCGA-DQ-7592-01A	0.277957	0.164316	0.163183	0.127293	0.0539637	0.0107571	0.016149	0.0259893	0	0	0.0499813	0.0524899	0	0	0.00615894	0.0415356	0.00982189	0.000404793	0	0	0	0
TCGA-CN-6011-01A	0.116633	0.0459461	0.254428	0.166003	0.143574	0	0.00128498	0	0	0.000680604	0.0162411	0	0	0.0938461	0.0141431	0.0565065	0.0604858	0.0295217	0	0.000705696	0	0
TCGA-CR-6488-01A	0.453758	0.0290469	0.268763	0.0368214	0.0579503	0.0406034	0.00567712	0	0	0.0196976	0.0442955	0	0	0	0.0207602	0	0.015287	0	0.00702667	0.000312687	0	0
TCGA-CR-5249-01A	0.0348874	0.0520177	0.0973088	0.0832058	0.211867	0.108718	0.0688406	0.131986	0	0.0474447	0.027028	0	0	0.0312626	0.0144022	0.0196407	0	0.00443514	0.0669552	0	0	0
TCGA-CN-5358-01A	0.124918	0.0581559	0.186819	0.0754715	0.160519	0.0703992	0.0853496	0.133865	0.0137376	0.0198349	0.0210197	0.0080758	0	0	0.00707393	0.0300093	0	0	0	0.00475171	0	0
TCGA-CV-7177-01A	0.272291	0.009632	0.247473	0.0250256	0.0310684	0.00490185	0.0906776	0.0881599	0.0217469	0.0455403	0.0640517	0.0020014	0	0.00268467	0.0676653	0.0270795	0	0	0	0	0	0
TCGA-CR-7388-01A	0.0394856	0.0381783	0.136309	0.0736125	0.189761	0.0401515	0.184775	0.00211772	0.0676761	0.00864682	0	0.0177301	0	0.0375977	0	0.0239995	0	0.0326655	0.0438093	0.0634851	0	0
TCGA-CQ-6223-01A	0.112707	0.05856	0.148504	0.0985657	0.0428292	0.0719874	0.0592968	0.170262	0.00723647	0	0.00688654	0.020579	0	0.0937214	0	0.0625117	0.00482948	0.0414768	0	4.68e-05	0	0
TCGA-CV-7261-01A	0.106838	0.110635	0.211558	0.0496956	0.102154	0.0222098	0.141582	0.129913	0.067353	0	0	0	0	0.0241686	0	0.00670195	0.00986885	0.00459449	0	0.0127291	0	0
TCGA-CR-6482-01A	0.00187367	0.0807818	0.172292	0.0773474	0.185453	0.0576989	0.104948	0.155487	0	0.064488	0.0269592	0	0	0.0115005	0.0374234	0	0.014131	0.00961731	0	0	0	0
TCGA-BA-6873-01A	0.188187	0.138242	0.226526	0.127993	0.169323	0.0125816	0.0153814	0.00928502	0.0378304	0	0	0	0	0	0.0158874	0.0308583	0.0195938	0.008311	0	0	0	0
TCGA-CN-6994-01A	0.364534	0.0149576	0.254962	0.0250443	0.0355485	0.0749839	0.0135285	0	0	0.0354339	0.033948	0	0	0.07901	0.0234695	0.00477061	0.0279036	0.00505511	0.00685037	0	0	0
TCGA-CV-5435-01A	0.353857	0.0487754	0.266089	0.0207319	0.163211	0	0.00841959	0.0032216	0	0	0.0643965	0	0	0	0.0271166	0.0194768	0.0247044	0	0	0	0	0
TCGA-CN-6992-01A	0.160859	0.0420297	0.28526	0.0594923	0.0878091	0.0432837	0.0649487	0.112381	0	0.0417438	0.048402	0.00184727	0	0	0.00724767	0.0343003	0	0.00340442	0	0	0.00699125	0
TCGA-CN-5370-01A	0.0562929	0.102126	0.36799	0.0612039	0.168293	0.0315302	0.0178036	0.0480328	0.0137971	0	0	0.00844693	0	0.0170741	0.0309741	0.0257561	0	0.0290569	0	0.021622	0	0
TCGA-CR-7371-01A	0.0580043	0.0667157	0.100842	0.105256	0.207509	0.020458	0.0841241	0.103479	0.0237765	0.0376403	0.00409881	0.0173382	0	0.0529348	0	0.0247531	0	0.0282545	0	0.0648162	0	0
TCGA-CR-7367-01A	0.190903	0.0756171	0.170491	0.0612992	0.184042	0	0.143173	0.0659693	0.0232947	0	0.0193374	0.0187747	0	0	0	0.0413445	0	0	0	0.00575417	0	0
TCGA-CV-6936-01A	0.0372989	0.100722	0.0934886	0.256101	0	0.107535	0.148337	0.0959384	0.0219916	0.0217744	0	0.0044099	0	0.0291283	0.0108585	0.0412915	0.00612927	0.0192625	0	0.00573311	0	0
TCGA-CR-6481-01A	0.14324	0.10127	0.12584	0.155769	0.0942615	0.0595479	0.103522	0.0667372	0	0.0607848	0.0304036	0.00228141	0	0	0.00422994	0.0003123	0.0286733	0.000897798	0.0222302	0	0	0
TCGA-CN-5360-01A	0.0890183	0.105787	0.187558	0.147238	0.0545563	0.0268234	0.0694817	0.166832	0	0.0753644	0.0204402	0.0136655	0	0	0.01749	0.00517225	0.0170605	0.00351386	0	0	0	0
TCGA-CV-7238-01A	0.166391	0.090973	0.159044	0.153466	0.0384603	0.0791904	0.112833	0.0989974	0.0317725	0.039485	0	0	0	0.0152049	0.00123871	0.0129433	0	0	0	0	0	0
TCGA-CN-6022-01A	0.347215	0.0314729	0.258391	0.0241604	0.115512	0.0138088	0	0.00267345	0.0624027	0.0570351	0	0	0	0	0.0181809	0.0488165	0	0.00974082	0.00708791	0.00350343	0	0
TCGA-CV-6441-01A	0	0.149358	0.133669	0.0590426	0.00218438	0.0357798	0.00983172	0	0	0	0.133108	0	0.031581	0.267414	0	0	0.0633015	0.0582686	0.0564614	0	0	0
TCGA-CR-7374-01A	0	0.015183	0.204387	0.0968996	0.0980216	0.0553635	0.192401	0.0140043	0.0176591	0.0749825	0.00260782	0.0316698	0	0.0436744	0.026263	0.0665292	0	0.0440374	0.0114654	0	0.00485116	0
TCGA-DQ-5625-01A	0.000555405	0.15438	0.162479	0.348827	0	0.112899	0.00610676	0	0.00457886	0.0287472	0	0.0447098	0	0	0.0611098	0.0112409	0.0503835	0.0134074	0	0.000575899	0	0
TCGA-CV-7090-01A	0.213598	0.0814143	0.324034	0.0499116	0.141403	0.0723094	0.00033119	0.0163735	0.0330803	0.0133297	0	0	0	0	0.00713645	0.020105	0.0269729	0	0	0	0	0
TCGA-HD-7229-01A	0.0907233	0.109637	0.0848236	0.154854	0.0654794	0.034145	0.128344	0.133494	0.051431	0	0	0.0277617	0	0.0672407	0	0.0366498	0.00348825	0.0119271	0	0	0	0
TCGA-CN-4742-01A	0.326317	0.0143698	0.103654	0.0317195	0.100379	0.0118891	0.0879407	0.181706	0.0507754	0.0065817	0	0	0	0.00591335	0	0.0643513	0	0.014404	0	0	0	0
TCGA-CN-5365-01A	0.0552109	0.0845696	0.268943	0.177287	0	0.0701035	0	0	0.128079	0.0124772	0	0	0	0.00402081	0.0689256	0	0.0697635	0.0110344	0.0347543	0.0148321	0	0
TCGA-CN-4728-01A	0.32853	0.05425	0.311721	0.0527956	0.0830977	0.0426552	0.000284229	0.0107685	0.0123114	0.0395377	0.000811191	0	0	0.00874522	0.00904193	0.0352996	0	0	0.0101514	0	0	0
TCGA-CN-4731-01A	0.194873	0.0220252	0.0705997	0.101868	0.0745312	0.0656876	0.113508	0.102403	0	0.0107439	0.0115044	0	0	0.109947	0.00243871	0.0752582	0.0170618	0.0275505	0	0	0	0
TCGA-CV-6961-01A	0.0180677	0.190181	0.210421	0.0715594	0.0462785	0.0964145	0	0	0.00721161	0	0	0	0	0.174094	0	0.0378399	0.0056701	0.0769638	0.00303252	0.0622655	0	0
TCGA-D6-A6EN-01A	0	0.0696663	0.162406	0.329063	0	0.122068	0	0	0.0465232	0.0416057	0	0.0757947	0	0.00208959	0.0209016	0	0	0.00166516	0.108248	0	0	0.0199697
TCGA-HD-A6I0-01A	0.122135	0.0864912	0.258659	0.184881	0	0.101507	0.0129813	0	0.0438387	0.0623601	0	0.0099014	0	0	0	0.0789069	0	0.0202755	0.0180633	0	0	0
TCGA-CN-A499-01A	0	0.232996	0.148607	0.22672	0	0.0989649	0.0203611	0.0187925	0.00397279	0.0135092	0	0.0983337	0	0.0673534	0.00524057	0.0462213	0.00181049	0.0171172	0	0	0	0
TCGA-CV-A45R-01A	0.211216	0.196838	0.202259	0.0901108	0.047876	0.0898724	0.00642788	0	0	0	0.0929844	0	0	0	0	0.014334	0.0162306	0	0.0304742	0.00137696	0	0
TCGA-BB-8601-01A	0.0321323	0	0.134122	0.0633126	0.20894	0.0701746	0.156648	0	0.0813366	0	0.0413269	0.00214356	0	0.0604005	0.0249416	0	0	0.0733931	0.0511282	0	0	0
TCGA-CQ-7069-01A	0.312542	0.0400587	0.081422	0.0255419	0.0978836	0.00135258	0.0317895	0	0.154848	0	0	0	0.0140602	0.187761	0	0.0166887	0.0197064	0	0.00422864	0.0121166	0	0
TCGA-BB-8596-01A	0.407498	0.0138158	0.274327	0.024072	0.0227634	0.0599328	0.0180843	0.0696976	0	0.0399782	0.0373646	0	0	0.0117663	0	0.0129631	0.00773744	0	0	0	0	0
TCGA-H7-8501-01A	0.0310568	0.162441	0.170597	0.258629	0.00661496	0.0470403	0.00909631	0.0124583	0.0393343	0.0119734	0	0.159612	0	0.00442781	0.00252655	0.0829347	0	0.00125741	0	0	0	0
TCGA-HD-8635-01A	0.148087	0.0520923	0.247554	0.0889232	0.149599	0.0173886	0.103004	0.0731371	0.0115265	0.00639549	0	0	0	0.0114919	0	0.0220978	0.0181725	0.0505302	0	0	0	0
TCGA-D6-6827-01A	0.0387888	0.0369973	0.155467	0.109807	0.161749	0.0282841	0.069298	0.210899	0.0321739	0.0837142	0	0.0165441	0	0.0167694	0	0	0	0.0395087	0	0	0	0
TCGA-CV-A6JU-01A	0	0.0572337	0.386316	0.106393	0	0.0805809	0.021585	0	0.000390932	0.0672206	0.0049937	0	0	0.0533179	0.0146012	0.0226261	0	0.0293336	0.154444	0.000963705	0	0
TCGA-CV-A45Y-01A	0.20201	0.110607	0.120148	0.066027	0	0.0880545	0.133706	0.161032	0	0.0806045	0.0258754	0	0	0	0.00433066	0.000406995	0.00326152	0	0	0.00393642	0	0
TCGA-D6-A4ZB-01A	0.196025	0.0313233	0.167738	0.0826009	0.0921203	0.0876242	0.152061	0	0.016828	0.00129084	0	0	0	0.0397046	0.000192006	0.0044029	0.0316761	0.00892636	0.0705834	0.0169024	0	0
TCGA-CV-A45W-01A	0.214126	0.0857476	0.172701	0.12257	0.0335549	0.0728522	0.157243	0.0562677	0.00423746	0.0213225	0.0147053	0	0	0	0	0.0318526	0	0.00167158	0.00896241	0.00218541	0	0
TCGA-CN-A642-01A	0	0.158592	0.13456	0.270228	0.0262074	0.0619193	0.00278228	0.0111203	0.0430317	0.0187109	0	0.087892	0	0	0.103087	0.0338429	0.0215193	0.0265081	0	0	0	0
TCGA-QK-A652-01A	0.0795398	0.169216	0.304923	0.0740333	0.00429007	0.126845	0.0183155	0.0508613	0	0.0353879	0.0588449	0	0	0	0.0580651	0	0.0129796	0	0	0.0066991	0	0
TCGA-CV-A465-01A	0.164969	0.112096	0.134521	0.0252754	0.00933015	0.0634942	0.210656	0	0.0275754	0	0.0642365	0	0.0349506	0.0102227	0.102427	0	0.0366405	0	0	0.00360577	0	0
TCGA-MT-A51W-01A	0.177517	0.199852	0.073907	0.165495	0.0793521	0.0761028	0.0212814	0	0.128382	0	0	0	0	0.0370893	0.00529874	0.0144382	0.0179056	0	0	0.00337916	0	0
TCGA-HD-A633-01A	0.461021	0.0161909	0.187937	0.0374104	0.0526161	0.0143095	0	0.00142854	0.105208	0.0293224	0	0	0	0.00581582	0	0.0195438	0	0.0523033	0.00204899	0.0134158	0.00142775	0
TCGA-QK-A64Z-01A	0.141982	0.205517	0.159711	0.1256	0.0640049	0.0872415	0.00193944	0	0	0	0.0574701	0	0	0	0.0421701	0	0.0895396	0.0248254	0	0	0	0
TCGA-CN-A641-01A	0.107132	0.0463493	0.252789	0.00585442	0.00844538	0.13185	0.144714	0	0	0	0.0894427	0.0313705	0.0423396	0.0266616	0.0606467	0	0	0	0.0256171	0.0248439	0	0.00194262
TCGA-BA-A6DD-01A	0.0719112	0.148919	0.122083	0.187168	0	0.0701955	0.208519	0.0614074	0	0.0249884	0	0.0397234	0	0.00928707	0.016876	0.0138156	0.00403317	0.0102021	0	0.0108716	0	0
TCGA-BA-A6DE-01A	0.0390808	0.153127	0.166	0.0819225	0.128557	0.0701643	0.106962	0.0749685	0.0184227	0	0	0.0324579	0	0.0311826	0.00987449	0	0.0491522	0.0124253	0	0.00458511	0.0211177	0
TCGA-CV-A6JD-01A	0.0366506	0.151508	0.288614	0.14618	0.0291576	0.155344	0	0	0.0049505	0.0373885	0	0.000576421	0	0	0.119939	0	0.0117399	0	0.0132099	0.00474191	0	0
TCGA-CV-A6JE-01A	0.0943409	0.0525656	0.146348	0.314378	0	0.079118	0.0246067	0	0.00325352	0.0910658	0.00705462	0.00538433	0	0.0148276	0.0362198	0.00482613	0.0587372	0.0188222	0.0484519	0	0	0
TCGA-CV-A6JN-01A	0.0726209	0.051034	0.195851	0.14631	0.00785252	0.0866943	0	0	0.125246	0.0264933	0	0.00950101	0	0.0403881	0.0421251	0	0.0693072	0.0134864	0.103641	0.00944996	0	0
TCGA-CN-A498-01A	0.0813626	0.123759	0.127558	0.145672	0.0365355	0.118949	0.203279	0.0118959	0.00131444	0	0.00567111	0	0	0.03805	0.0455203	0.000913335	0.0502361	0.00928347	0	0	0	0
TCGA-CV-7425-01A	0.106712	0.129695	0.128146	0.148607	0	0.140101	0.00770837	0.0432741	0	0.0723751	0.039445	0.00229285	0	0.010231	0.121251	0.00807868	0.026475	0.00367428	0	0.0119342	0	0
TCGA-H7-A6C4-01A	0.0923177	0.0345421	0.105686	0.0811219	0.02635	0.0807766	0.125262	0.0991989	0.0420361	0	0.0291642	0.0729245	0	0.0534542	0.0577512	0.0925308	0	0	0	0.00688447	0	0
TCGA-IQ-A61J-01A	0.0655505	0.0605397	0.233484	0.0698458	0	0.127811	0	0	0	0.0287448	0.0911928	0	0	0.0325362	0.221578	0	0.0521797	0	0.0139235	0.00261336	0	0
TCGA-P3-A6SW-01A	0.0356192	0.0729856	0.139728	0.294068	0	0.121678	0.156087	0.00252584	0	0.0288229	0.0511896	0.00332113	0	0.0370012	0	0.00808911	0.0252778	0.00590228	0.015931	0.00177256	0	0
TCGA-T2-A6X0-01A	0.0129438	0.18904	0.204345	0.243259	0.00641037	0.0643807	0.105523	0.0877002	0	0.0272153	0.0145886	0.00838855	0	0	0	0.0219098	0	0.014295	0	0	0	0
TCGA-P3-A6T0-01A	0.588329	0	0.150346	0.00245651	0.0898019	0.00359042	0.0076934	0	0.0566093	0	0	0.0375975	0	0.0175746	0.00127074	0.0421897	0	0	0.0025409	0	0	0
TCGA-UF-A718-01A	0.0826807	0.0886866	0.127419	0.111176	0.0690955	0.124341	0.169769	0.0425471	0.0244021	0.0767092	0	0	0	0.034814	0	0	0.0428516	0.00550825	0	0	0	0
TCGA-UF-A7JF-01A	0.214591	0	0.248695	0.039029	0	0.0705412	0.0907232	0.108192	0.0949359	0.0445658	0	0	0	0.00306094	0.0493936	0.0358123	0	0.000459349	0	0	0	0
TCGA-P3-A6T5-01A	0.302294	0.0106522	0.150389	0.0344126	0	0.114262	0.129284	0.0364126	0.0524005	0.0323453	0	0	0	0.0575349	0.0316781	0	0.0466022	0	0	0.00173216	0	0
TCGA-BB-A6UM-01A	0	0.0847576	0.0882	0.296317	0	0.222828	0.0127028	0.00485324	0.0179159	0.052949	0	0	0	0.123684	0	0	0.0814658	0.0143269	0	0	0	0
TCGA-T2-A6WZ-01A	0.104214	0.0198302	0.156463	0.122579	0	0.147205	0.201261	0.0220647	0.0107753	0.0535124	0.0161432	0	0	0.000697919	0.000492765	0	0.0969703	0.0017673	0.0308915	0.0124687	0	0.0026646
TCGA-UF-A71E-01A	0.3167	0	0.149491	0.0701753	0	0.102836	0.173225	0	0	0.000570258	0	0	0	0.0279999	0.0528528	0	0.024047	0	0.0678853	0.0142184	0	0
TCGA-WA-A7H4-01A	0.285709	0.0269836	0.153365	0.0274153	0.106067	0.0361027	0.111249	0.075893	0	0.0111611	0.0260591	0	0.017419	0	0	0.00889719	0.0875517	0.0231089	0	0.00301857	0	0
TCGA-CN-A6V3-01A	0.108865	0.19392	0.112186	0.174507	0.0188551	0.0742864	0.158209	0.0753075	0.0164872	0.00403152	0	0.00239417	0	0.00393634	0.0012685	0.0121854	0.041242	0	0	0.00231925	0	0
TCGA-QK-AA3J-01A	0	0.0517537	0.137795	0.192648	0.064647	0.127915	0.166404	0	0	0.0418605	0.0522022	0.0122072	0	0.0862082	0	0.00463106	0.0289527	0.00872299	0.0225355	0.00151579	0	0
TCGA-4P-AA8J-01A	0.231207	0.0606851	0.173706	0.0743455	0.0509835	0.042423	0.112922	0.0708105	0.0684291	0.0468131	0	0	0	0	0.00942845	0.0471256	0	0	0	0.011122	0	0
TCGA-CV-A6K0-01B	0.0978848	0.148868	0.243417	0.143351	0.101279	0.0968521	0	0.0318794	0	0.0611294	0.0373501	0.0013823	0	0	0	0.00758836	0.0290199	0	0	0	0	0
TCGA-D6-6824-01A	0.0603358	0.0733972	0.223422	0.0626761	0.205106	0.0377673	0.0535986	0.117463	0	0.0169757	0.0696864	0	0	0.00290022	0	0.0219675	0.0324359	0.0148195	0	0.00744811	0	0
TCGA-D6-6825-01A	0.10288	0.142418	0.24781	0.180702	0.0211545	0.105937	0.0073825	0.00700896	0	0.0384304	0.0265572	0.0424792	0	0.00865905	0.0173835	0.0304952	0	0.00231126	0	0.0183914	0	0
TCGA-CV-7424-01A	0.0680265	0.109005	0.12089	0.145373	0.208958	0.0638488	0.0848674	0.098291	0	0.0167197	0.0348004	0	0	0	0.0258381	0	0.0233822	0	0	0	0	0
TCGA-CN-6010-01A	0.0216929	0.0754525	0.167328	0.115444	0.240921	0.0397825	0.125647	0.00451341	0	0	0.0937668	0	0	0.0159262	0.0101114	0	0.0371962	0.0209266	0.0312915	0	0	0
TCGA-CV-7247-01A	0.565269	0.0318326	0.106602	0.00367431	0.203516	0	0.000396364	0.0046262	0.0300708	0	0	0	0	0.00231829	0	0.0516936	0	0	0	0	0	0
TCGA-CR-7372-01A	0.0486571	0.0280301	0.277588	0.0414066	0.178634	0.0127226	0.116838	0.0307305	0.0344561	0.0377316	0.0763621	0	0	0.0457803	0.0229044	0.0273989	0	0.0197559	0	0.00100409	0	0
TCGA-CN-6995-01A	0.0850242	0.105583	0.13849	0.189008	0.12636	0.0850475	0	0	0.0758291	0.0429797	0	0.0191899	0	0	0.0127989	0.0676839	0.000910337	0.0199196	0.031176	0	0	0
TCGA-BA-7269-01A	0.162334	0.0273476	0.23122	0.16144	0.00361397	0.0878599	0.114929	0.00201077	0.0639041	0.0529784	0	0	0	0.0239979	0.00383993	0	0.047476	0.014483	0	0.00256522	0	0
TCGA-CN-4726-01A	0.037127	0.000197338	0.161126	0.0413652	0.160361	0.00654423	0.00642297	0.0060949	0.217661	0	0	0	0	0.0247092	0.106317	0	0	0.0609808	0	0.168157	0.002936	0
TCGA-CN-5361-01A	0.142965	0.181216	0.307455	0.0213455	0.0394514	0.0517209	0.00194219	0	0	0.0321512	0.0790658	0	0	0	0.0553729	0	0.0802059	0	0.00478629	0	0	0.0023217
TCGA-CV-6935-01A	0.287646	0.0226648	0.294732	0.0419695	0.0606101	0.0139597	0.0862157	0.112406	0	0.0259123	0.0241741	0	0	0.0136452	0	0.000859808	0.00425699	0	0	0	0.010948	0
TCGA-CX-7219-01A	0.217441	0.0662402	0.117987	0.0576266	0.0414443	0.0740502	0.104206	0.0719779	0.0872768	0.0134705	0	0.0313608	0	0.0130446	0.0027125	0.0778371	0	0	0	0.0209242	0.00240076	0
TCGA-CR-7391-01A	0.137181	0.0719378	0.157175	0.118423	0.126339	0.0518241	0.0413882	0.144731	0.0154536	0.0700269	0.0187686	0	0	0	0.00690012	0.0398523	0	0	0	0	0	0
TCGA-BA-5555-01A	0.0606801	0.117235	0.184089	0.115915	0.0838968	0.0499925	0.0945125	0.0619134	0	0.0474714	0.0735801	0.00443738	0	0	0.0278271	0.00236444	0.0505162	0.0151543	0	0.0104155	0	0
TCGA-CN-5367-01A	0.183293	0.0785698	0.218953	0.0239866	0.13419	0.00893394	0.00605741	0.00938156	0.0141711	0	0	0	0	0	0.267045	0.0511398	0	0.0042796	0	0	0	0
TCGA-CV-5976-01A	0.313217	0.0962515	0.246756	0.00866707	0.167619	0.0149595	0.0129022	0	0.0879326	0	0	0	0	0	0.0219958	0.0284411	0.00125829	0	0	0	0	0
TCGA-CQ-5333-01A	0.00886245	0.153447	0.312203	0.142198	0.0580851	0.10042	0.00228552	0.0208628	0.0111819	0.046289	0	0.0444618	0	0	0.052655	0	0.0366992	0.0103482	0	0	0	0
TCGA-H7-8502-01A	0.0478738	0.138367	0.236311	0.0506087	0.189063	0	0.0153709	0.0170653	0.0656206	0	0	0.019249	0	0.105028	0	0.0726661	0	0.0298287	0	0.0129478	0	0
TCGA-CX-A4AQ-01A	0.090286	0.0567374	0.048493	0.141328	0.118936	0.126738	0	0.217844	0	0.107463	0.0131341	0	0	0	0.0318756	0	0.0264119	0.0207523	0	0	0	0
TCGA-CV-A468-01A	0.0216246	0.111863	0.140224	0.201673	0.0930295	0.0881678	0.0785944	0.094679	0	0.0723903	0.0160868	0.0186717	0	0.0239081	0.0238565	0.00935987	0	0.00587102	0	0	0	0
TCGA-F7-A61S-01A	0.082008	0.115687	0.235529	0.159599	0	0.089901	0.0557177	0.0533132	0.0572296	0.0262502	0	0.0165047	0	0.078893	0	0.0201587	0.00920969	0	0	0	0	0
TCGA-CV-A6JY-01A	0.0219517	0.0101478	0.251467	0.0757457	0.055685	0.104539	0.124402	0	0	0	0.209602	0	0	0.0223142	0.053125	0.00704892	0.0135601	0.00132482	0.0298671	0.0192197	0	0
TCGA-MT-A67F-01A	0.0432413	0.0819402	0.149564	0.30739	0	0.0940341	0.0127829	0.0333762	0.0386605	0.0485391	0.0127345	0.105095	0	0.0150348	0.00934014	0.0372537	0	0	0	0.011014	0	0
TCGA-UF-A7J9-01A	0.437324	0.028995	0.228189	0.0354109	0.041753	0.0416648	0.0400244	0.0775104	0.0258216	0.0300783	0	0	0	0	0	0.00928531	0.00109775	0	0	0.00284493	0	0
TCGA-HD-7754-01A	0.135859	0.00489419	0.304662	0.0318744	0.189344	0.0282731	0.103139	0.0441811	0.0177114	0	0.00535883	0.00393328	0	0.0184985	0.0399861	0.048128	0	0.00732667	0	0.0168305	0	0
TCGA-CQ-5334-01A	0.077067	0.158353	0.252037	0.210217	0.100038	0.0528146	0.012051	0.0223467	0	0.00148621	0.00238012	0.0378511	0	0	0.00207015	0.0464489	0.00730427	0.0175342	0	0	0	0
TCGA-CV-7099-01A	0.171923	0.179347	0.195324	0.139408	0.0371232	0.0603034	0.0330416	0.0511612	0.0293262	0.0170409	0.00685475	0.0029776	0	0.0218361	0	0.0348478	0.0165179	0	0	0.0029676	0	0
TCGA-CN-6997-01A	0.219958	0.0119159	0.136212	0.0619348	0.10459	0.0904563	0.107735	0.0161098	0.0139915	0.0122313	0.00359712	0	0	0.0305112	0.0138172	0.0879224	0.0224852	0.0510253	0.0155068	0	0	0
TCGA-BA-5153-01A	0.013913	0.0230424	0.0786435	0.242699	0.128586	0.0821677	0.0691496	0.102616	0.0470053	0.0500542	0	0.0533436	0	0.0129549	0.00625707	0.0439489	0.029871	0.0157481	0	0	0	0
TCGA-CV-5979-01A	0	0.054127	0.326995	0.0243167	0.189767	0.0287008	0.00811189	0.00660801	0	0	0.0409757	0	0	0.0812195	0.141844	0	0.0778935	0.0193576	0	8.32e-05	0	0
TCGA-CR-6470-01A	0.0399859	0.0823219	0.109317	0.158029	0.15128	0.121145	0.081292	0.0550056	0	0.09439	0.00572482	0	0	0	0.000911035	0	0.0554755	0.00504728	0.0400743	0	0	0
TCGA-CR-7401-01A	0.0337885	0.056135	0.290401	0.0798952	0.119685	0.0353914	0	0	0	0.0647453	0.143039	0	0	0.0450961	0.0189675	0	0.0157533	0.0343398	0.0527657	0.0099974	0	0
TCGA-BA-4074-01A	0.103552	0.113231	0.267352	0.0305032	0.153787	0	0.0247032	0.0220003	0.119702	0	0	0.000264866	0.00758192	0.0995176	0.0206607	0.0126157	0	0	0	0.0235582	0.000969693	0
TCGA-CN-4733-01A	0.0111624	0.111027	0.182383	0.169332	0.167736	0.0811112	0.121495	0	0.000535639	0.0414353	0.0411536	0	0	0.0219363	0.0102829	0	0.00355514	0.0109336	0.0238407	0.00207947	0	0
TCGA-HD-8634-01A	0.180034	0.157039	0.118031	0.108287	0.0338048	0.00631069	0	0	0.0873103	0.00150579	0	0.0830336	0	0.063363	0	0.100308	0	0.0121527	0.0488191	0	0	0
TCGA-QK-A6IJ-01A	0.0197293	0.0745013	0.28128	0.0571666	0.0333276	0.0700358	0.0614278	0	0.0750249	0.198012	0	0	0	0.0177826	0.0152553	0	0.0568582	0	0.00896587	0.0306331	0	0
TCGA-CV-A6K1-01A	0.069135	0.0744274	0.223823	0.203688	0	0.0835099	0.089836	0.0363919	0.0599454	0.0564282	0	0.0052845	0	0.0210825	0	0.0462828	0.0157446	0.00918329	0	0.00523773	0	0
TCGA-BA-A4IF-01A	0.120202	0.0290595	0.101767	0.0549105	0.0469821	0.110967	0.0725359	0.0725279	0.0281181	0.0487177	0	0	0	0.0359825	0.0774314	0.023887	0.121148	0.0426776	0.006898	0.00420117	0.00198681	0
TCGA-UF-A7JK-01A	0.522968	0.0226116	0.12661	0.000782366	0.0764674	0	0.051392	0	0	0	0.0187833	0	0.0855576	0	0.0345826	0	0.0361092	0	0.0232925	0.000843278	0	0
TCGA-QK-A6IG-01A	0.067355	0.135385	0.228259	0.165512	0.0370129	0.136764	0.0729503	0	0.062358	0.00254938	0	0	0	0.00599535	0.0139074	0.00320469	0.0471972	0.00521843	0	0.0163314	0	0
TCGA-CR-7385-01A	0.0482918	0.0947203	0.162228	0.106502	0.206387	0.0769419	0.0825812	0.044318	0	0.0711943	0	0	0	0.0166752	0.0208424	0.0247024	0.00681041	0.0107455	0.0267311	0.000329385	0	0
TCGA-BA-6872-01A	0.274926	0.0775547	0.169721	0.0486275	0.0944925	0.033552	0.0497636	0.0600222	0.109119	0.00838428	0	0	0.00491705	0.00929897	0	0.055015	0	0	0	0.00460693	0	0
TCGA-CN-5373-01A	0	0.0999264	0.196122	0.0558327	0.184225	0.146845	0.0240766	0.0891507	0	0.0317455	0.0146669	0	0	0.0289991	0.0474618	0.021237	0.0376444	0.0213079	0	0.000758935	0	0
TCGA-CQ-7063-01A	0.13624	0.139219	0.203668	0.153802	0.0878838	0.0797375	0.00397096	0.00231707	0.00761857	0.0293566	0.0187564	0.0431397	0	0	0.0492488	0.0285977	0.0158211	0	0	0.000622784	0	0
TCGA-F7-A50I-01A	0.100042	0.152284	0.123839	0.168516	0.0142602	0.0779114	0.127154	0.000449266	0	0.0173413	0.042881	0	0	0.0650171	0.0457294	0	0.0593221	0.00525419	0	0	0	0
TCGA-D6-A6ES-01A	0.400028	0	0.153038	0.0681541	0	0.0439434	0.02578	0	0.0630052	0.013907	0	0	0.00553203	0.0956827	0.051594	0.0241786	0	0.0238575	0.0148959	0.0164032	0	0
TCGA-P3-A6T7-01A	0.44191	0.199216	0.0269058	0.085178	0	0.121708	0.0240165	0	0.00113088	0.00146664	0	0	0	0.0632989	0	0.0130588	0.0111112	0	0.00804544	0.00295367	0	0
TCGA-CQ-6220-01A	0.094154	0.15522	0.200412	0.0590234	0.106699	0.0678622	0.00415508	0.00201882	0.0146629	0.00949602	0	0	0	0.0905741	0.0151387	0.111389	0.00847122	0.0482137	0.0125101	0	0	0
TCGA-CV-6950-01A	0.33099	0.149784	0.232883	0.078758	0.0599188	0.0631385	0.00294985	0	0.0293272	0.0209568	0	0	0	0	0	0.00364656	0.0209902	0	0.00665709	0	0	0
TCGA-CN-A497-01A	0.0518453	0.0333108	0.116345	0.0545336	0.213843	0.173338	0.114716	0.0298315	0.0768837	0	0	0.0112255	0	0.0391552	0.0118341	0.0429326	0	0.0302057	0	0	0	0
TCGA-P3-A6T2-01A	0.17822	0.0746631	0.271526	0.0578366	0.116759	0	0.0120016	0.011898	0.173634	0	0	0.0147924	0.0259941	0.0035115	0	0.0547795	0	0.00438513	0	0	0	0
TCGA-CQ-6227-01A	0.244611	0.11961	0.306241	0.0485219	0.0487706	0.0247434	0.059381	0.0174048	0.0025883	0.0230279	0.0335157	0	0	0	0.0198814	0	0.0142814	0.0171962	0.0202263	0	0	0
TCGA-CN-5374-01A	0.0624232	0.0688805	0.0852378	0.15482	0.157813	0.12382	0.00433162	0.0354295	0	0.097819	0.0244351	0	0	0	0.00579202	0	0.046254	0	0.132945	0	0	0
TCGA-CV-5444-01A	0.0925634	0.140749	0.258448	0.0538516	0.154627	0.0912435	0.0160209	0.0149344	0	0.0396835	0.0517384	0	0	0	0.0269244	0	0.0409355	0.01828	0	0	0	0
TCGA-CR-7392-01A	0.105983	0.0830152	0.179839	0.112176	0.227574	0.038979	0.0923775	0	0.00284991	0.00634559	0.0362191	0	0	0.0499827	0	0.00890638	0	0	0.0501524	0.00559989	0	0
TCGA-BA-A4IG-01A	0.026218	0.122953	0.139603	0.104214	0.256133	0.111288	0.0209534	0.11448	0.00696347	0.0116951	0	0	0	0.0106601	0.0100359	0.0154205	0	0.0023951	0.046987	0	0	0
TCGA-UF-A7JJ-01A	0.175188	0.0668399	0.199339	0.162024	0.0870557	0.0510449	0.104272	0	0.0150253	0.0129386	0	0.0190621	0	0.0180221	0.0284622	0.0151701	0	0.0156951	0.0298616	0	0	0
TCGA-D6-6517-01A	0.0485783	0.0210154	0.188813	0.0564315	0.196977	0	0.0738698	0.0683721	0.113558	0.0983828	0	0	0	0	0.0829281	0	0	0.039009	0	0.012065	0	0
TCGA-BB-4224-01A	0.181094	0.0649256	0.102836	0.0307513	0	0.107848	0.00111856	0	0	0	0.0343917	0	0.0295154	0	0.322329	0	0.0401304	0.0264441	0.0465426	0.0120735	0	0
TCGA-CN-4738-01A	0.021394	0.13946	0.189907	0.0980802	0.118117	0.0904016	0.0998265	0.0266128	0	0.0158921	0.0711611	0.00132247	0	0.00840304	0.0353837	0.0370783	0.000493654	0.027019	0	0.0194473	0	0
TCGA-BA-A6DB-01A	0.0668137	0.116753	0.184641	0.163338	0.094998	0.114893	0.0231552	0.082313	0	0.031201	0.0434701	0	0	0	0.0266576	0	0.0448423	0	0	0	0	0.00692357
TCGA-CQ-A4CB-01A	0.063453	0.12462	0.175184	0.0240396	0.159297	0.0297734	0.0339995	0.074371	0.0971382	0	0	0	0	0.157914	0	0.0159125	0.00225308	0.0332793	0	0.00876525	0	0
TCGA-CN-A63W-01A	0.289574	0.124199	0.153363	0.106637	0	0.138684	0.0257427	0	0.0436123	0	0	0	0.0386499	0	0	0.015336	0.0207909	0	0.0434111	0	0	0
TCGA-CQ-6218-01A	0.106311	0.0909489	0.318112	0.0663516	0.131889	0.0287536	0.0847689	0.0273973	0.0070053	0	0.037545	0.0189194	0	0.0397693	0.00322755	0.020349	0	0.00122307	0	0.0174296	0	0
TCGA-CQ-6228-01A	0.356253	0.0138126	0.239496	0.0110647	0.0315525	0.0506919	0.0475858	0.0232575	0.0340552	0.0199299	0	0	0	0.0293346	0	0.0455785	0	0	0.0973879	0	0	0
TCGA-CV-7103-01A	0.291989	0.0264097	0.201197	0.0295548	0.143981	0.0356219	0.0039173	0	0	0.0724949	0.0695178	0	0	0	0.0298842	0.0393684	0.0391327	0	0.0169318	0	0	0
TCGA-CQ-5331-01A	0	0.233038	0.245864	0.135188	0.0767974	0.10777	0.00171116	0.062595	0.00282935	0.0435217	0	0.011635	0	0.00481699	0.00842403	0.0476833	0	0.00900195	0	0.00912375	0	0
TCGA-HD-8314-01A	0.240479	0.0591974	0.331906	0.0576374	0.0230113	0.0514592	0.0589673	0.0752467	0	0.0648715	0.026384	0	0	0	0.00204003	0.00880044	0	0	0	0	0	0
TCGA-P3-A5Q6-01A	0.103604	0.0367809	0.497453	0.045606	0.0905107	0.0234101	0.0495222	0	0	0.00912512	0.0324535	0	0.00574832	0.0622974	0.0110602	0	0.0135481	0	0.018881	0	0	0
TCGA-MZ-A7D7-01A	0.0474529	0.11898	0.0284125	0.0297845	0.171963	0.0355965	0.0654404	0	0.0386744	0	0	0	0.083762	0.0133386	0.196347	0	0.0682551	0.0253247	0.0676684	0.00900042	0	0
TCGA-TN-A7HI-01A	0.107036	0.0831531	0.145224	0.210071	0	0.153293	0.103246	0.0145689	0.00580751	0.0620476	0.0121369	0.00157959	0	0.00743281	0.00382449	0	0.0685262	0	0.0179924	0.00406046	0	0
TCGA-QK-A8Z7-01A	0.325885	0.0705065	0.14358	0.127267	0	0.120715	0.0725511	0.078905	0	0.0187616	0.0278601	0	0	0	0	0.0139691	0	0	0	0	0	0
TCGA-CV-7446-01A	0.0281284	0.143344	0.235357	0.0589661	0.0246206	0.0585055	0.0367844	0.0989105	0.0936247	0.0118607	0	0.0519131	0	0.0124281	0.0589791	0.0544232	0	0.0309405	0	0.00121428	0	0
TCGA-CV-7435-01A	0.283351	0.0564471	0.268324	0.0361982	0.10033	0.0136397	0.0943611	0.0413331	0	0.0214986	0.0372682	0.0073727	0	0.00724447	0	0.0326316	0	0	0	0	0	0
TCGA-CR-7368-01A	0.0593204	0.0820566	0.22783	0.0907484	0.188433	0.05574	0.107376	0.0117619	0	0.0275781	0.0366639	0	0	0.0216464	0.0222464	0.0333491	0.0172687	0.0179805	0	0	0	0
TCGA-CN-6019-01A	0.364219	0.0275103	0.346642	0.0643627	0.0460446	0.0368591	0.0167301	0.0468951	0	0.0233631	0.0159938	0	0	0	0.000888565	0	0.0070855	0	0	0.00340531	0	0
TCGA-CV-6942-01A	0.130458	0.0826444	0.192803	0.199431	0.0414919	0.105102	0.0978936	0.0114651	0.0280054	0.00879891	0.00155436	0.00587295	0	0.0126215	0	0	0.0591011	0	0.0120885	0.0106691	0	0
TCGA-CV-A6JZ-01A	0.019333	0.118974	0.301878	0.295359	0	0.0867542	0.00997741	0.0256956	0	0.0450156	0.00767639	0.0221306	0	0	0.0171028	0.0142366	0.0259446	0.00931602	0	0.00060617	0	0
TCGA-QK-A6II-01A	0.128725	0.0529334	0.0963094	0.134068	0	0	0	0	0.143473	0	0	0.116944	0	0.026503	0.053485	0.134023	0	0.0973023	0.00995061	0.00164976	0.0046337	0
TCGA-CN-A6V7-01A	0	0.0684922	0.157079	0.241434	0	0.191412	0.0654797	0.0386267	0.0726376	0.00661172	0	0.0375703	0	0.0600041	0.0128207	0.0198278	0.00937444	0.0186299	0	0	0	0
TCGA-UF-A71A-06A	0.235384	0	0.0777	0.0465376	0.331889	0	0.00445706	0	0.0704522	0	0	0	0.100234	0.0507059	0	0.0362783	0.0325662	0.00175832	0	0	0.0120364	0
TCGA-UF-A7JS-01A	0.209045	0	0.391294	0.0911387	0	0.0149573	0.0196673	0	0.0410326	0.0156099	0	0.0217527	0.0173261	0.00909502	0.0092705	0	0.0739043	0.00390937	0.0819975	0	0	0
TCGA-CV-7411-01A	0.328896	0.0152798	0.105261	0.155913	0.0113626	0.0491979	0.0570386	0.0843963	0.09153	0.0296776	0	0	0	0.0438758	0.0167198	0	0	0.0108513	0	0	0	0
TCGA-CV-7091-01A	0.0815343	0.133544	0.241717	0.154902	0.11183	0.144136	0.0112492	0.0194465	0	0.0130386	0.0204193	0	0	0.00491834	0.0263884	0.00510692	0.0225008	0.00314869	0	0.00611829	0	0
TCGA-BA-A6DJ-01A	0.217368	0.131423	0.216534	0.148677	0	0.0681424	0.0102268	0	0.100613	0.00304396	0	0.0312752	0	0.0291019	0	0.0357812	0.00781287	0	0	0	0	0
TCGA-P3-A5QE-01A	0.060186	0.15297	0.0153627	0.203772	0.236125	0.12199	0.00294348	0.0355793	0.0039365	0.07154	0	0	0	0.0390815	0.0197503	0.0257912	0	0.00712964	0.00384267	0	0	0
TCGA-BA-4077-01B	0.0708091	0.249097	0.156022	0.110669	0.0664726	0.0726412	0.0083525	0.036554	0	0.0359399	0.0783206	0	0	0.0130339	0.0547389	0.0104059	0.0319611	0.000329427	0	0.00465279	0	0
TCGA-CR-6487-01A	0	0.10974	0.147126	0.315159	0.0220884	0.0750678	0.0701028	0.0295206	0.00196008	0.053401	0.000421527	0.0769206	0	0.00272117	0.0174057	0.0282673	0.0141957	0.0166352	0.0192672	0	0	0
TCGA-HD-8224-01A	0	0	0.403892	0.190302	0	0.0414939	0.00970997	0	0	0.00471157	0.173965	0	0	0.0369842	0.0105502	0	0.0282124	0.046668	0.0491977	0	0.00431308	0
TCGA-BB-A5HZ-01A	0	0.0621508	0.292536	0.03177	0.0642276	0.203337	0.115615	0.000767567	0.0576236	0	0	0	0	0.087679	0.0092943	0.0379234	0	0.0162101	0	0.0208664	0	0
TCGA-UF-A7JH-01A	0.084246	0.135757	0.235186	0.0901571	0.0702371	0.159415	0.0685163	0.00522367	0.0243052	0.0150219	0	0.0211131	0	0	0.0465158	0.00706276	0.0190676	0.0181758	0	0	0	0
TCGA-CV-6934-01A	0.182365	0.10696	0.246276	0.145172	0.161138	0.043591	0.00413093	0.0261724	0	0.0286081	0.0230577	0	0	0	0.0105081	0.000558933	0.0214613	0	0	0	0	0
TCGA-CV-5440-01A	0.135936	0.213278	0.321976	0.0506273	0.00110826	0.007569	0.0238429	0	0	0	0.0238586	0	0.036648	0	0.0609482	0.0458022	0	0.0110217	0.0673839	0	0	0
TCGA-CR-7395-01A	0.106278	0.0836822	0.201132	0.153971	0.0843151	0.0742381	0.0755618	0.0324044	0.0206465	0.0493259	0	0.0423878	0	0.0304661	0	0.0287404	0.00362687	0	0	0.0132245	0	0
TCGA-BA-A4IH-01A	0.0369375	0.125165	0.0797979	0.175434	0.087779	0.138078	0.037095	0.0933503	0.0507845	0.0198543	0	0.0108976	0	0.113883	0.00492248	0.0154618	0.00291123	0.00641587	0	0.00123278	0	0
TCGA-CV-7432-01A	0.103558	0.10324	0.195505	0.0559053	0	0.0121148	0.0103972	0	0.181218	0.0258788	0	0.123612	0	0	0.03962	0.105281	0	0.00226869	0.016749	0.024653	0	0
TCGA-CR-6471-01A	0.0624348	0.0576124	0.19288	0.196461	0.146011	0.0511872	0.0641467	0.034731	0.00601303	0.0628996	0.0146054	0	0	0.012907	0.0532906	0.0212329	0	0.0235873	0	0	0	0
TCGA-CV-7254-01A	0.113268	0.0491111	0.327633	0.0756698	0.105937	0.0780572	0.0379906	0.0971084	0	0.0341242	0.0163026	0	0	0	0.00826282	0	0.0530325	0	0	0.00350409	0	0
TCGA-BB-4223-01A	0.0259268	0.0917705	0.156583	0.304719	0.0390907	0.123945	0	0.0614431	0	0.0489845	0.00688165	0.00335576	0	0	0.00863366	0.0224736	0.0173076	0.021659	0.0672264	0	0	0
TCGA-BA-4075-01A	0.096808	0.00478072	0.163943	0.0193715	0.188985	0	0.00110485	0	0.231163	0	0	0	0.00133266	0	0.0574273	0.11129	0	0.0323806	0.00683046	0.0564208	0.0281618	0
TCGA-CQ-5327-01A	0.0278538	0.136194	0.31515	0.252522	0.000794821	0.0745113	0.0135102	0.0229778	0.000715067	0.0429903	0	0.0287877	0	0	0.0183743	0.0314684	0.00544721	0.0221859	0	0.00651691	0	0
TCGA-D6-8569-01A	0.0999516	0.0912883	0.130293	0.0643378	0.179057	0.0218035	0	0	0.0649321	0.00387756	0	0	0	0.168409	0.0176369	0.0709577	0	0.0274657	0.0495137	0.0104762	0	0
TCGA-D6-6823-01A	0.160582	0.110604	0.142286	0.0177625	0.0808189	0.0395157	0.110143	0.00378707	0.100752	0	0	0.0589667	0	0.0185568	0	0.0248884	0	0.00860799	0	0.122729	0	0
TCGA-D6-A6EK-01A	0.0115746	0.0389238	0.191883	0.230748	0	0.128059	0.100349	0.00613156	0	0.148536	0.00493832	0	0	0.0434134	0.0392799	0	0.0561639	0	0	0	0	0
TCGA-HL-7533-01A	0.111967	0.159592	0.0565673	0.264414	0.00274128	0.0979072	0.00429721	0.0236271	0.0301327	0.0174451	0	0.0838411	0	0	0.0282972	0.0359688	0.0540079	0.0291934	0	0	0	0
TCGA-BA-A6DI-01A	0.103601	0.137102	0.0753709	0.137062	0.185747	0.0485316	0.113483	0	0.0833895	0	0	0	0	0.0404766	0.0158513	0.0382747	0	0.021111	0	0	0	0
TCGA-CV-6955-01A	0.0353535	0.11261	0.227575	0.124727	0.129934	0.0657881	0	0	0	0.048347	0.0227585	0	0	0.0204404	0.127642	0	0.063882	0.00175726	0.0170684	0.00211653	0	0
TCGA-CN-A49B-01A	0.0336326	0.11652	0.313328	0.142201	0.0418563	0.129413	0.015846	0.0241773	0.00608376	0.0165017	0	0.0442565	0	0.0661192	0	0.0396488	0	0.00877069	0	0.00164576	0	0
TCGA-D6-A6EO-01A	0.144029	0.0425636	0.199568	0.0340139	0.00834022	0.122349	0.109849	0.00340749	0.103552	0.0108993	0	0	0	0.123605	0	0.0772377	0.00586114	0.00185744	0	0.012867	0	0
TCGA-CR-7399-01A	0.0392575	0.177834	0.201239	0.251518	0.0716132	0.0736921	0.00126165	0.015171	0	0.0783854	0.00401664	0.0252277	0	0	0.0140395	0.031063	0	0.00381374	0	0.0118682	0	0
TCGA-P3-A5Q5-01A	0.0438361	0.0559785	0.22008	0.247352	0	0.104275	0.051026	0.0475263	0	0.0262911	0.0472971	0.0462633	0	0	0.0175859	0	0.0818898	0.0105986	0	0	0	0
TCGA-QK-A6VB-01A	0.540402	0.0131672	0.185762	0.0218223	0	0.109057	0.00967548	0	0	0	0.0152084	0	0	0.0391718	0	0	0.0253298	0	0.0389946	0.00140955	0	0
TCGA-UF-A71B-01A	0.266657	0.0181683	0.203951	0.0455867	0.0895737	0.04492	0.102169	0	0.139094	0.00497888	0	0	0	0.00841625	0.00474695	0.0116198	0.00867422	0.00452017	0.0271283	0.0197945	0	0
TCGA-CR-7365-01A	0.30929	0.0365153	0.248052	0.0479243	0.182749	0.00452094	0.00256073	0.00929479	0.0704371	0.0109195	0	0	0	0	0.00386702	0.0561889	0	0.017681	0	0	0	0
TCGA-CV-6962-01A	0.344015	0	0.302431	0.0361675	0	0.0910485	0.0102218	0.00214227	0.100688	0	0	0	0.00763958	0.0573121	0	0.0350361	0	0.00785921	0	0	0.00543825	0
TCGA-CN-4741-01A	0.0684307	0.0736868	0.187003	0.12901	0.0941686	0.150293	0.0722527	0.0323262	0	0	0.0140373	0.00870622	0	0.0109336	0.0780328	0.0108283	0.0229404	0.0436351	0	0.00371435	0	0
TCGA-CN-A49C-01A	0	0.0804788	0.172966	0.114596	0	0.180131	0.0335862	0.00289698	0	0.0524705	0.0417013	0	0	0.0590182	0.0841934	0	0.0621783	0.0400425	0.0731033	0.0026385	0	0
TCGA-CV-A45T-01A	0.0589685	0.176489	0.129338	0.14505	0	0.153998	0.0280735	0.0306169	0.0463682	0.0635599	0	0.0043659	0	0.00782414	0	0	0.05422	0	0.073471	0	0	0.0276581
TCGA-P3-A6SX-01A	0.561709	0.00106862	0.0846073	0.0137352	0.0686907	0.0637103	0.0175411	0.00345111	0.0654873	0.0301037	0	0	0	0	0	0.0536912	0.0191886	0	0.0117974	0.00521887	0	0
TCGA-CN-6017-01A	0.000493016	0.123529	0.216107	0.243591	0.0668655	0.0465443	0.0722023	0.00838685	0	0.0592329	0.0283455	0	0	0.0179633	0.0114484	0.0100156	0.0185379	0.0474899	0.0241528	0.00509524	0	0
TCGA-CR-5243-01A	0.0343859	0.0607217	0.0555902	0.176744	0.173956	0.0465212	0.096393	0	0.00899891	0.126435	0.0677357	0.017146	0	0.0250038	0.0552675	0.0306442	0	0.010483	0.0114896	0.00248431	0	0
TCGA-CQ-5325-01A	0.005656	0.140138	0.21842	0.198284	0.128954	0.0586881	0.0853067	0.025958	0	0.0363909	0.0352903	0.00887865	0	0.0225607	0.00450635	0	0.0117949	0.0117509	0	0.00565292	0	0.0017696
TCGA-CN-6998-01A	0.310623	0.18561	0.123849	0.088389	0.155852	0.00800641	0.00539082	0	0.0199867	0	0	0	0	0.0466759	0	0.0422384	0.0121604	0.00121916	0	0	0	0
TCGA-QK-A6VC-01A	0.0137856	0.153578	0.0908418	0.159841	0.069794	0.104974	0.0547982	0.0680032	0	0.107441	0.0212845	0.003742	0	0.105837	0	0.0118195	0.0118659	0.0127343	0	0.00965983	0	0
TCGA-UF-A719-01A	0.141944	0	0.195516	0.091831	0.0925149	0.110632	0.0709276	0.0480994	0.0504218	0.0122752	0	0	0	0.0594069	0.0404951	0.0430869	0.029484	0.00915304	0	0.004212	0	0
TCGA-D6-A6EQ-01A	0.100535	0.0933717	0.275753	0.0883796	0.0333275	0.104482	0.0800117	0.0129106	0	0.0769245	0.0219148	0	0	0	0.0494119	0	0.0567469	0.0062301	0	0	0	0
TCGA-CR-7382-01A	0.0734406	0.161031	0.223002	0.0501698	0.157391	0.0786628	0.00367733	0.0547762	0	0.0108666	0.0171375	0.0281931	0	0.00296981	0	0.0696372	0	0.0573262	0	0.0117195	0	0
TCGA-T3-A92N-01A	0	0.299631	0.241546	0.136346	0	0.207877	0.0281551	0	0.0174235	0	0	0.0190476	0	0.00350953	0.00812673	0.0130849	0.0250286	0.000224956	0	0	0	0

## Sheet: Supplementary Table 8
The expression of immune check points genes in the indicated groups
sample	PDCD1	ADORA2A	BTLA	CD200R1	CD40LG	ICOS	ICOSLG	IDO2	LGALS9	TIGIT	CD274	CTLA4	HAVCR2	IDO1	LAG3	CD8A	CXCL10	CXCL9	GZMA	GZMB	PRF1	IFNG	TBX2	riskScore	risk
TCGA-P3-A5Q5-01A	3.49251	0.167911	0.895833	1.34	1.07566	2.50997	0.069887	0.13079	4.56931	2.87478	1.802	3.05723	3.85391	2.98415	3.74083	4.5861	6.32846	6.87944	5.76807	5.10798	4.37982	2.36148	0.46626	0.108449	low
TCGA-P3-A6SW-01A	2.0809	0.171688	0.38138	0.405081	0.33254	0.840139	0.258236	0.110353	4.06739	1.29559	4.23821	1.77824	2.32889	4.15382	2.59869	3.4191	4.82073	4.79287	4.36176	4.31185	3.41491	0.806743	1.13507	0.116737	low
TCGA-H7-A76A-01A	3.0609	0.34326	1.16842	0.373284	1.51583	1.62221	0.0834113	0.37372	4.60829	2.37	1.74701	2.98538	3.63712	5.72495	2.90399	3.0125	6.39398	6.49789	5.06551	4.93509	3.82751	0.71238	1.34174	0.167592	low
TCGA-CR-5248-01A	3.12367	0.264736	1.02699	1.04893	1.82772	2.6596	0.0422983	0.0910656	3.90516	3.23303	2.26843	2.79048	3.30644	3.21182	4.71038	4.1139	5.31545	7.8183	6.5093	6.09005	6.02701	3.25974	0.667514	0.168015	low
TCGA-CN-A6V6-01A	3.25072	0.195143	0.591767	0.617463	0.400212	1.59765	0.0325107	0.2439	4.51983	2.43297	2.92132	3.30638	2.8643	6.63475	3.68709	4.46742	8.49822	6.9998	5.58556	5.45154	4.3156	1.69282	0.666178	0.210984	low
TCGA-QK-A6V9-01A	2.48476	0.241604	0.489218	0.561102	0.749432	1.70353	1.17853	0.24901	5.10233	2.07967	2.39927	2.79332	2.03069	5.73398	2.67442	3.55371	8.42075	7.26194	4.33467	4.86199	3.21879	1.28363	0.689578	0.219752	low
TCGA-CR-6467-01A	3.03558	0.293722	1.28455	1.04825	1.26597	2.31037	0.157385	0.291406	4.15483	2.92174	1.99965	2.42639	2.8328	4.86385	3.03357	4.81615	5.52366	6.59003	4.90928	4.5763	4.0603	1.43939	1.39942	0.22394	low
TCGA-CR-5250-01A	1.26515	0.182701	0.307545	0.744017	1.35487	1.81114	0.782132	0.0559345	4.18591	1.7271	1.65869	1.59286	1.48866	2.14143	1.31885	1.77508	5.28274	4.60771	3.24364	2.36465	2.25771	0.153396	1.3764	0.233376	low
TCGA-CR-7404-01A	1.82754	0.14876	0.788113	0.637771	1.27521	1.97348	0.182407	0.113681	3.80514	2.06015	3.04835	2.44353	2.58219	4.23638	2.42265	2.93083	5.79714	6.38444	4.01016	3.93737	3.62326	1.15151	1.20906	0.238378	low
TCGA-CN-A6UY-01A	2.99705	0.324579	0.289905	0.304261	0.73105	1.48762	0.146985	0.14509	4.60428	1.85779	2.5743	2.25407	2.73705	3.79445	4.09078	3.65228	6.55942	3.26129	6.02597	5.81671	4.61413	1.71261	0.81906	0.245014	low
TCGA-KU-A6H7-06A	2.30014	0.126262	0.184901	0.576318	0.14474	0.786559	0.23156	0.129799	6.3699	0.900844	2.54325	1.34815	2.13156	3.16686	2.85946	2.7644	6.62366	4.56019	4.88585	4.90964	3.34234	0.790694	0.692298	0.246123	low
TCGA-KU-A6H7-01A	2.99775	0.16615	0.314357	0.468999	0.442944	1.33797	0.185353	0.136561	4.65848	1.86147	3.99201	2.23148	2.91131	7.85243	3.71324	4.24592	9.37274	7.56263	5.41257	5.46724	4.32289	2.13916	0.740138	0.247968	low
TCGA-CV-5443-01A	2.20881	0.169942	0.479075	0.584623	0.861861	1.25535	0.658203	0.202534	4.37531	1.93388	6.96618	1.97805	2.97158	4.77738	3.10506	3.48868	5.95802	7.10003	4.81592	5.29968	3.94052	2.18981	0.814214	0.251139	low
TCGA-UP-A6WW-01A	1.4487	0.118723	0.2218	0.356295	0.309375	0.997928	0.782932	0.325273	4.01187	1.17766	1.38937	2.22516	2.4456	3.59006	2.16399	1.37391	5.24616	4.54514	2.28452	1.97887	1.89542	0.386899	0.659129	0.266383	low
TCGA-MZ-A5BI-01A	2.58054	0.378299	0.715076	0.854265	0.642762	3.08081	1.43878	0.565943	6.23646	2.2772	3.78545	3.74137	2.84756	4.38946	3.17769	3.17859	8.11476	4.94466	3.77699	4.15869	2.99688	1.33282	1.70233	0.267555	low
TCGA-BB-4223-01A	2.2737	0.218472	0.912589	0.797891	0.55422	2.05173	0.765177	0.206976	3.46911	2.34125	1.58621	2.04733	2.71276	3.22291	2.71411	4.16193	6.56645	6.25268	4.11837	3.86666	3.44601	1.10106	0.740277	0.279851	low
TCGA-CQ-5323-01A	1.63007	0.184089	0.160412	0.314477	0.458268	1.11851	0.19419	0.0689031	2.6207	1.16941	1.95267	1.10677	1.47445	3.19899	1.56811	2.28938	6.59561	5.21683	2.95383	3.02252	2.53713	0.758416	1.14859	0.284989	low
TCGA-TN-A7HL-01A	3.25129	0.0927143	0.754933	0.898975	0.525152	1.50836	0.46443	0.268527	5.53042	2.58391	3.69748	3.03765	4.1164	7.09743	4.62764	4.25083	7.73907	6.12484	6.62753	6.79623	5.63173	2.62387	0.498126	0.290095	low
TCGA-CR-6482-01A	2.52158	0.316518	1.48131	1.40217	2.15208	2.27977	0.372412	0.195545	4.1749	2.46157	1.70766	2.22275	2.90493	4.26497	2.99382	3.20974	5.94255	6.95481	3.62643	2.76185	3.36486	0.959565	1.28865	0.29599	low
TCGA-CV-6433-01A	3.91841	0.309716	0.818728	0.938103	0.569028	1.91984	0.097127	0.243152	3.97052	2.78446	1.35224	2.6819	4.09833	7.20599	5.05602	5.65782	9.17965	7.94311	5.6612	6.07503	4.60507	1.60584	0.594577	0.302525	low
TCGA-P3-A5QE-01A	2.48979	0.128439	1.19367	0.836357	2.08871	2.16551	1.2426	0.802933	5.76695	2.37423	2.80754	3.05396	1.72968	5.77025	2.55853	3.78712	7.75604	5.68043	3.942	3.73402	3.15287	0.659938	0.307355	0.306277	low
TCGA-BB-A6UM-01A	2.19394	0.133858	0.220828	0.538415	0.15339	1.62325	0.366288	0.156612	5.34453	2.00825	3.32393	2.0993	2.28433	7.52532	3.45641	3.2978	9.23415	4.43998	4.79352	4.38537	3.76147	1.58219	0.690805	0.309322	low
TCGA-CN-A63U-01A	0.274736	0.019766	0.143139	0.374343	0.0152283	0.0916741	0.0702874	0.00624578	2.8692	0.101389	1.11369	0.274028	0.388667	0.621096	1.83505	0.277661	1.95813	1.68869	0.681562	0.691455	0.564972	0.0226589	0.875531	0.313207	low
TCGA-CR-5243-01A	1.44948	0.261484	0.446109	0.806427	0.840954	1.92759	0.264771	0.0974065	3.18132	1.59055	1.91225	2.3656	1.92932	2.37942	1.70782	2.7635	6.59528	4.55985	3.56741	2.3953	2.73845	0.358031	1.70605	0.321158	low
TCGA-CN-5374-01A	1.36772	0.195212	0.897427	0.830168	1.81053	1.52945	0.0715333	0.203334	3.56759	1.55126	1.39909	1.40479	1.89117	4.81115	1.88675	3.11245	5.6013	6.14173	5.35917	3.63344	3.15434	0.683185	0.454896	0.323603	low
TCGA-DQ-7591-01A	2.36091	0.250493	0.985269	0.93824	1.06619	2.51328	1.01908	0.656695	3.64635	2.48852	1.39152	2.70743	2.55502	5.196	2.88102	3.63449	7.15009	4.79909	4.61428	4.2773	3.43243	1.89522	0.826118	0.326662	low
TCGA-QK-A6IF-01A	2.71765	0.213647	1.46393	1.17951	2.06168	2.80248	0.411531	0.263997	5.17813	2.54594	1.76436	3.40067	2.39857	3.4896	3.46776	3.36034	5.63515	5.86562	4.13559	3.1251	3.34783	1.20683	0.838049	0.333393	low
TCGA-D6-A74Q-01A	0.739003	0.0858704	0.149652	0.304723	0.0711366	0.824416	0.0162454	0.0526918	3.36541	0.876021	1.49329	1.17395	1.33675	1.21639	1.96014	1.75297	3.19916	2.28926	5.36843	2.74452	2.36552	0.164325	0.975087	0.339255	low
TCGA-CX-A4AQ-01A	2.6677	0.055141	1.043	0.552034	1.15067	1.56499	1.81236	0.336366	7.10333	1.97773	0.638524	2.79128	2.57163	3.07527	2.54069	2.31289	5.52505	3.87566	3.72716	3.33819	2.56061	0.131987	2.00137	0.34039	low
TCGA-BA-5153-01A	2.41163	0.2992	0.582911	0.936018	1.13943	1.67054	0.140295	0.233921	4.49016	2.37021	1.35761	2.35422	2.29845	2.84268	2.83814	4.0443	5.20787	3.08436	6.52439	4.62791	4.89066	0.959391	1.02445	0.346446	low
TCGA-CR-6480-01A	1.4155	0.13456	0.314896	0.390343	0.857685	0.857623	0.415305	0.0675878	4.61458	1.10033	1.92063	0.958688	1.36599	5.83023	1.52497	2.09002	4.69647	4.07889	3.1366	2.38994	2.26441	0.570084	0.909507	0.34866	low
TCGA-MZ-A6I9-01A	1.04723	0.284512	0.206445	0.633552	0.330124	0.516075	0.0215193	0.10796	3.85281	0.519574	0.516201	0.797237	0.848775	2.43897	1.41595	1.24455	2.34869	1.78509	2.30844	1.61288	1.55969	0.283094	1.13712	0.35202	low
TCGA-T2-A6X0-01A	2.1821	0.133958	0.490192	0.34581	0.699292	0.945213	0.155301	0.0624011	4.40587	1.50248	4.20984	2.09956	2.39893	4.58756	2.1622	3.20028	6.73718	6.77169	3.24046	3.42418	2.9137	0.569325	4.31868	0.355845	low
TCGA-BA-5559-01A	3.49678	0.294066	0.976058	1.14201	1.2275	2.35374	0.650244	0.30054	4.11363	2.94512	3.21995	3.06004	3.53055	5.43816	4.15704	4.86734	7.84199	8.05195	5.07881	5.54583	4.62409	2.78281	0.878029	0.357903	low
TCGA-CN-A49C-01A	0.954955	0.175686	0.147088	0.27331	0.142016	0.706348	0.0900118	0.0727155	3.74863	0.729723	2.34261	1.21416	1.57093	3.06877	1.3041	1.43355	5.27501	2.65823	3.08329	2.64829	2.10323	0.388066	0.7356	0.35799	low
TCGA-P3-A6T6-01A	0.387221	0	0.0822693	0.0524681	0	0.202102	0.377085	0.0575288	2.57864	0.207072	0.508416	0.36731	0.570236	1.10645	0.763899	0.452222	3.1837	2.2107	1.03673	1.12352	1.06951	0.0422048	0.746483	0.360876	low
TCGA-CR-6470-01A	2.64551	0.244441	1.18589	0.894595	1.26949	2.50502	1.59633	0.464021	5.66732	2.60837	3.01016	2.79159	2.70232	7.814	3.00259	4.2421	8.25698	6.56468	5.05455	3.8972	3.72322	1.16541	1.69599	0.362786	low
TCGA-CR-5249-01A	1.97255	0.202923	1.08263	0.998995	2.02591	2.14853	1.21746	0.119355	4.31122	2.04994	2.71407	1.82655	2.09656	3.84793	2.00757	3.15402	4.92081	4.63115	3.85385	2.14955	2.52146	0.564498	0.909954	0.365364	low
TCGA-CV-A461-01A	3.02566	0.10373	0.465163	0.778554	0.40333	1.80591	0.550821	0.189888	4.97183	2.71968	2.13291	2.35332	3.47873	4.5332	3.80765	4.21938	7.83021	6.69925	5.3111	5.33843	4.46455	2.32016	0.931536	0.38779	low
TCGA-RS-A6TP-01A	0.951077	0.0345251	0.0555309	0.062925	0.152872	0.485837	0.0102863	0.0233585	3.01773	0.809538	2.57061	1.413	1.25823	6.14008	2.91489	1.53022	7.57308	5.0546	3.25089	4.82734	2.86404	0.585213	0.311072	0.393294	low
TCGA-CR-6481-01A	3.08305	0.329174	1.46044	1.41872	1.71976	3.06869	0.747307	0.113294	4.69639	2.9944	2.56753	2.88847	3.65424	4.57132	3.68227	4.42951	6.37153	7.89097	5.28881	4.62359	4.68049	1.9447	1.51335	0.397215	low
TCGA-CN-4741-01A	0.743783	0.0985718	0.106189	0.226428	0.28401	0.700037	0.0590542	0.0845608	2.54795	0.900673	1.29099	1.11025	1.58702	1.82083	1.08903	1.5647	4.44509	3.92418	2.65683	2.12173	1.61165	0.173142	0.84309	0.398847	low
TCGA-CV-A45T-01A	2.34726	0.139112	0.786914	0.824346	1.43803	2.51584	0.0505835	0.204075	3.88154	1.99527	2.97825	2.79926	2.24425	5.01254	3.35025	2.7951	8.87325	6.90245	4.7746	4.63018	3.75669	1.86602	1.38384	0.403724	low
TCGA-CN-A6V7-01A	1.49319	0.13136	0.170455	0.268689	0.0742243	0.776749	0.0639752	0.109894	4.32506	0.875549	1.321	1.32237	1.56695	5.06231	1.72103	2.22726	3.93439	3.38582	2.6823	3.18253	2.21625	0.704934	0.27124	0.405672	low
TCGA-F7-7848-01A	1.23551	0.0654002	0.57773	0.578627	0.422783	1.05382	0.535076	0.0451947	2.57437	1.51764	0.925513	1.3128	1.7587	1.31971	1.83758	2.50455	2.29962	2.82847	3.58424	2.89034	2.74254	0.0614863	1.21377	0.409198	low
TCGA-CR-7385-01A	2.04436	0.184395	0.860857	0.871511	1.23014	1.7864	0.257984	0.118705	4.17902	1.9398	2.22891	2.45794	2.62872	4.44194	1.91641	3.13106	5.61603	5.17431	4.27551	3.56946	3.22455	0.724113	0.564986	0.41093	low
TCGA-BB-4225-01A	1.86274	0.183122	0.637186	0.487245	1.1276	2.85991	0.65837	0.182954	4.54957	2.23242	1.61156	2.48281	2.63312	4.11196	3.31965	3.84635	8.35984	4.85475	4.58275	4.42621	3.97099	0.776156	0.796084	0.42841	low
TCGA-CN-4739-01A	1.70452	0.123836	0.55596	0.729123	0.534195	0.880226	0.465054	0.0934902	2.73055	1.51406	1.08192	1.4004	1.66043	1.55343	1.80967	2.92298	2.57691	3.26146	2.91997	2.88385	2.70586	0.344806	0.950404	0.448262	low
TCGA-CN-A499-01A	2.0671	0.0765952	0.466087	0.554228	0.428707	2.33164	0.254157	0.2017	3.98104	2.01895	4.1768	2.08858	2.74948	7.96144	3.3499	3.39663	10.9005	8.76369	4.42923	4.52501	3.96568	2.18613	0.793397	0.453382	low
TCGA-CR-7368-01A	1.2131	0.0792042	0.295816	0.618498	0.563177	1.31676	0.0685054	0.0585449	2.96577	1.36004	1.12701	1.74692	2.02217	2.55234	1.52169	1.91497	4.54996	4.65181	3.80879	3.54217	2.99786	0.344638	1.06968	0.462713	low
TCGA-D6-A4ZB-01A	0.657478	0.0849348	0.105213	0.265254	0.0785746	0.575565	0.213993	0.0406925	2.93844	0.828988	0.924078	1.23589	1.17416	1.18328	1.3012	1.34839	3.53265	2.0993	2.30839	2.53887	2.15761	0.170249	1.81465	0.467182	low
TCGA-CV-7242-01A	1.83267	0.0758329	0.625484	1.58925	0.749175	0.965333	0.135654	0.0993485	4.047	1.78122	1.20855	1.79168	1.98497	3.9463	2.23341	3.27757	4.96576	4.92084	4.48852	4.06877	3.799	0.402763	2.45195	0.482541	low
TCGA-UF-A71D-01A	0.727638	0.0242615	0.145075	0.358679	0.234022	0.516166	0.138595	0.0342181	1.68768	0.66332	0.879338	0.380594	0.642283	0.667901	0.802894	1.20854	2.15271	1.3324	2.34946	2.16264	1.58805	0.19655	1.99422	0.484102	low
TCGA-BB-4217-01A	2.63016	0.292115	1.4693	1.13001	2.88568	1.99675	0.314839	0.207058	3.11709	2.34775	1.51003	1.9454	2.01582	2.34322	1.91511	2.4277	2.41688	3.25218	3.14861	2.41399	2.99762	0.194148	1.1102	0.500872	low
TCGA-CN-6988-01A	0.259915	0.0196706	0.0111877	0.343707	0.0338769	0.0838552	0.0772516	0.00466412	2.12086	0.145762	0.760089	0.175007	0.338917	0.393211	0.166627	0.456525	1.18435	0.87995	0.851862	0.751303	0.506134	0.0502498	2.08209	0.506754	low
TCGA-CR-6487-01A	3.61984	0.445219	1.24923	1.61905	1.42582	3.11576	0.522865	0.245351	5.77326	3.27631	3.97121	3.67696	3.75308	4.84164	4.76055	5.43002	7.07905	8.05635	5.22425	5.47453	5.22746	3.28576	1.40636	0.507276	low
TCGA-CN-A497-01A	1.16758	0.196446	0.44647	0.393154	0.361582	1.38886	0.131883	0.0524926	3.71827	1.26886	1.53095	1.6566	1.53225	1.87829	2.00632	1.14017	2.64641	3.9575	2.15288	2.25841	3.69259	0.568378	2.58738	0.518017	low
TCGA-QK-A6IJ-01A	0.767129	0.00759972	0.124134	0.191283	0.212191	1.13573	0.00393418	0.117318	3.0283	0.644829	0.95859	2.14952	1.36933	1.77013	2.40722	0.468767	5.82872	3.44424	2.85154	2.82253	1.15851	0.610967	0.541495	0.529365	low
TCGA-CV-A45W-01A	2.07304	0.319328	0.894196	0.536807	0.465865	1.04141	0.27067	0.0995315	4.09033	1.62503	4.01985	2.08851	2.73035	3.61538	2.70988	3.20701	5.74306	5.00446	3.62402	4.41882	3.2385	0.908102	2.68211	0.536597	low
TCGA-TN-A7HI-01A	1.94401	0.125342	0.590107	0.267572	0.319085	1.27846	0.227304	0.108162	4.10714	1.63833	1.35032	2.2638	1.90214	3.3458	3.07112	2.75703	5.52858	4.9419	4.18145	5.07826	2.90935	1.61994	2.62136	0.538024	low
TCGA-D6-A6EK-01A	1.58572	0.025466	0.336362	0.18932	0.285906	1.90242	0.00442095	0.116382	3.03494	1.72274	1.56711	2.58533	1.59543	3.52197	2.57139	2.17211	6.29863	3.59593	4.45527	4.01529	2.80767	0.761115	0.919711	0.541665	low
TCGA-CR-6471-01A	1.57778	0.0648478	0.490681	0.432269	0.598502	1.54188	0.0131294	0.0238711	2.05958	2.1234	2.67972	1.56827	1.88199	1.93159	1.67939	3.48612	6.1715	5.07276	3.31328	3.40531	3.15475	0.685919	1.09512	0.543375	low
TCGA-CV-A45R-01A	1.40507	0.0845461	0.231139	0.268298	0.146832	1.13243	0.0206293	0.0977273	2.94125	1.2021	3.68333	1.48055	2.07334	5.4582	1.85521	1.77227	7.75417	6.16242	2.80937	3.17684	2.53256	0.626112	1.58586	0.545614	low
TCGA-CR-7394-01A	2.4059	0.1891	0.881707	0.824989	0.755775	1.88486	0.00905539	0.0327797	3.13339	2.54634	2.72787	1.91916	3.0442	5.54828	3.47152	4.65197	7.87252	7.83915	4.92406	4.44927	4.51313	0.894881	1.49621	0.547182	low
TCGA-BA-4077-01B	1.51775	0.0288582	0.193102	0.917984	0.540612	1.0628	0.273718	0.06059	4.33628	1.29685	2.86691	1.11027	2.90102	6.6679	2.06386	2.67998	8.61134	6.78535	4.80405	4.05532	3.27435	0.731847	0.341393	0.555434	low
TCGA-F7-A50G-01A	1.76954	0.0594245	0.264674	0.532562	0.591437	1.15672	0.0878782	0.156548	2.40208	1.20125	3.94639	1.75485	2.22244	4.46352	1.66884	2.51527	7.77662	6.28058	3.16263	3.17172	2.83406	1.19329	0.799803	0.558292	low
TCGA-MT-A67A-01A	0.762939	0.0105227	0.0237594	0.305457	0.0479376	0.259762	0.095082	0.0489823	1.80427	0.718118	1.45074	0.366892	1.23114	1.86217	1.71811	2.04151	5.68664	4.35779	5.14718	3.61176	2.80653	0.83287	0.776325	0.561284	low
TCGA-D6-6827-01A	0.384347	0.0892483	0.0950736	0.269712	0.303214	0.369149	1.19085	0.04031	2.89109	0.440007	0.753472	3.46634	1.26217	1.87546	0.455057	1.05554	6.52314	1.96171	1.57138	0.719841	0.959139	0.0903304	1.51937	0.574294	low
TCGA-P3-A5QF-01A	0.771259	0.0410909	0.098954	0.121541	0.302583	0.521156	0.181976	0.0451676	3.898	0.806647	1.45411	1.18057	1.87985	1.70756	1.02664	1.14845	5.47813	4.35843	2.59366	3.39447	2.09853	0.517017	0.295986	0.577789	low
TCGA-BA-A4IH-01A	1.42606	0.232967	0.340997	0.615789	0.597332	1.31656	0.573755	0.149116	4.58651	1.12622	1.73919	2.08046	1.95382	3.80034	2.26137	2.84985	7.2573	4.69425	3.27808	3.27243	2.68842	0.924172	1.11852	0.580605	low
TCGA-HD-A6HZ-01A	1.73647	0.0931152	0.748926	0.37781	0.953903	1.69114	0.0134993	0.283696	2.89706	1.24653	2.20759	2.62449	2.30109	5.50505	1.81206	1.81459	6.07717	6.38374	3.3439	3.5877	2.56175	1.22365	0.91472	0.582559	low
TCGA-UF-A7JF-01A	0.474231	0.0170549	0.130153	0.500785	0.0957282	0.706217	0.423551	0.0710626	3.42002	0.486582	0.415529	1.3045	2.21942	0.978882	1.12625	0.711956	2.79849	1.6161	3.55977	2.07579	1.47038	0.243935	0.819673	0.588088	low
TCGA-BA-A6DB-01A	1.88806	0.0156341	0.748169	0.74722	0.891322	2.05088	0.00810423	0.0581379	3.36885	2.02421	1.78053	2.28019	2.30429	3.75003	2.39932	3.48	7.0862	6.27671	4.67407	3.60147	3.09358	0.807497	0.769534	0.590643	low
TCGA-CR-7402-01A	1.4476	0.140275	0.324313	0.410275	0.32934	1.24562	0.93938	0.0323407	4.04209	1.23144	0.950036	1.66635	1.39075	1.52834	1.58031	1.66733	3.19026	2.78784	3.6912	3.23925	2.84544	0.499343	1.26272	0.592576	low
TCGA-CR-7369-01A	0.575204	0.0615499	0.255339	0.275727	0.264433	0.871169	0.0161645	0.0196424	1.72371	0.901208	2.2451	0.90799	1.20237	0.869191	1.06103	1.86405	3.18698	2.01846	2.33756	3.17307	1.9975	0.0531277	1.20696	0.593634	low
TCGA-T2-A6WX-01A	2.80215	0.0798855	0.416411	0.913532	0.131658	1.87445	0.204806	0.153572	3.65179	2.37179	3.89871	2.48185	3.5725	7.22421	4.55313	4.815	10.0691	7.5838	5.75665	5.25166	4.89486	2.756	0.629609	0.5953	low
TCGA-CV-6942-01A	1.77304	0.0879147	0.477102	0.732205	0.549904	1.9142	0.0596755	0.236158	3.63843	2.21608	4.03435	2.40595	2.76046	4.83866	3.54508	3.40681	7.50258	6.8927	5.32893	4.63373	4.69202	1.53778	1.65333	0.597207	low
TCGA-UF-A7JO-01A	2.22826	0.0229767	0.443182	0.547064	0.903494	1.85903	0.00895299	0.451346	4.58592	1.69505	3.30528	2.89946	3.51326	5.83345	2.88298	3.31757	8.69755	7.93638	5.01363	5.47677	3.95271	1.77892	1.97687	0.599341	low
TCGA-CQ-A4CE-01A	0.988276	0.0464988	0.131628	0.482263	0.528803	0.750568	0.0547914	0.0744792	1.58091	0.865061	2.50606	1.26709	1.10448	3.77624	1.20774	2.05419	6.14411	5.26924	3.11062	3.23462	2.0723	1.05609	0.662234	0.600418	low
TCGA-CN-6013-01A	2.49021	0.0743986	0.490724	1.1791	0.85931	2.14591	0.0768642	0.190901	3.81931	2.1894	3.65072	3.15565	3.38812	6.178	3.49345	3.11747	7.08923	7.40828	4.19478	4.72238	4.09146	1.43317	0.62276	0.603382	low
TCGA-CR-6484-01A	2.4934	0.120082	0.628869	0.695788	0.783305	1.73649	0.0939835	0.198381	3.92572	1.68694	3.0692	2.27917	3.42293	6.12454	2.64429	3.01355	5.76347	6.32965	3.49557	3.64726	2.97152	0.911855	1.80947	0.606377	low
TCGA-CR-7391-01A	1.56104	0.125444	0.586611	0.714039	0.968662	1.86235	0.351264	0.103709	2.91153	1.74497	1.51525	1.62927	2.11308	3.18993	1.96321	3.19495	6.19518	5.44203	3.77499	2.76514	2.82469	0.574819	1.38388	0.617442	low
TCGA-HD-8314-01A	1.30752	0.120045	0.797492	0.463966	0.665753	1.35738	0.0138025	0.0899389	3.64145	1.69406	1.1221	2.2445	2.80132	2.18721	1.31013	2.14814	4.47484	5.40468	2.29991	2.05291	1.97565	0.118153	1.86484	0.622171	low
TCGA-BA-6870-01A	0.888986	0.0933031	0.3249	0.632255	0.216008	1.04907	0.12712	0.051053	2.07223	0.880479	0.71344	1.53306	1.08554	1.17889	0.898625	0.74453	2.10464	0.595688	2.10354	2.72177	1.65677	0.0466397	1.49958	0.624246	low
TCGA-CV-6953-01A	0.542747	0.0554682	0.115504	0.230952	0.154537	0.717791	0.00729064	0.00665393	1.31942	0.900576	1.37311	0.941552	1.36265	1.96968	1.2334	1.65712	2.59243	4.57791	2.36074	2.60093	1.70572	0.699615	0.656145	0.624677	low
TCGA-BA-A6DL-01A	0.465755	0.0239015	0.0990248	0.0999672	0.120003	0.447979	0.167455	0.0612159	3.03918	0.487992	0.814562	0.828991	0.532594	1.12524	0.872528	1.07938	2.58931	1.77222	2.19677	2.24731	2.30422	0.380639	0.53625	0.627058	low
TCGA-CR-6473-01A	1.13934	0.206861	0.225313	0.234601	0.320827	1.47724	0.200119	0.373823	3.6857	0.993183	1.62408	1.56148	1.08516	6.78902	1.45875	1.4244	6.59495	3.61332	2.15276	1.94131	1.73921	0.319252	2.31764	0.629085	low
TCGA-CV-A468-01A	2.43941	0.103689	0.497031	0.53944	0.745347	2.14335	0.290961	0.104331	3.72221	2.21797	2.26849	2.24596	2.59663	3.54045	4.09302	3.83487	7.65811	5.84339	5.22295	4.17988	3.72772	0.969165	1.20754	0.630007	low
TCGA-CN-4729-01A	0.678108	0.0452258	0.130677	0.129654	0.287424	0.738885	0.0864316	0.0215125	1.82664	0.869905	1.59032	0.9999	1.28118	1.9471	1.17038	0.813794	2.22525	2.19014	1.62807	2.18169	1.58609	0.0196354	1.42245	0.630372	low
TCGA-CV-7248-01A	1.42508	0.134753	0.561583	0.859751	0.760374	0.681844	0.281109	0.023604	3.15218	1.20302	1.17166	1.06535	2.0379	1.23467	1.40879	2.1949	3.74467	3.25155	3.45562	2.84448	2.5207	0.311205	3.55829	0.630807	low
TCGA-H7-7774-01A	1.08481	0.0236486	0.394958	0.222572	0.223805	0.637314	0.125088	0.0267466	2.72789	0.933698	1.49492	0.877197	1.33719	2.55142	1.15348	2.37295	6.21378	5.54147	2.37456	2.52459	2.08893	0.213261	0.189322	0.632259	low
TCGA-CV-7410-01A	2.63254	0.270245	1.87078	0.942848	2.34404	2.33047	0.297804	0.195296	3.78296	2.56451	2.60207	2.12083	2.75327	3.83416	2.12221	2.98212	5.59904	6.33968	3.55174	3.70792	3.20685	0.832953	1.31534	0.632684	low
TCGA-CN-A49B-01A	2.08395	0.129799	0.200982	0.637809	0.453457	2.28252	0.0551097	0.0503689	3.67798	1.81065	2.75509	2.74965	3.10625	6.85188	3.6329	2.72354	6.53034	4.85649	4.02282	3.47056	2.98201	1.40753	0.97506	0.636336	low
TCGA-HD-8224-01A	0.395648	0.101533	0.0215303	0.92896	0.106323	0.45183	0.219708	0.00899466	2.74221	0.569178	2.23498	0.557739	1.94466	0.486021	0.636704	1.43183	2.25743	2.34129	2.55604	1.33154	1.66525	0.0643828	0.875305	0.641903	low
TCGA-CV-6939-01A	1.5555	0.0723965	0.399192	1.6479	0.253186	1.6216	0.108054	0.118899	3.95186	1.96429	2.94924	2.01358	2.64266	3.69275	2.13217	2.9535	6.24101	4.67162	4.10661	3.37185	2.81545	0.761292	1.37214	0.645411	low
TCGA-CN-5358-01A	1.90572	0.18496	0.952832	0.936115	1.00442	2.3901	0.0956006	0.08474	3.14382	2.31907	2.09794	2.54703	2.97196	3.3326	1.96463	3.54815	5.54416	5.69104	4.3151	3.51939	3.51956	0.855461	2.03061	0.657483	low
TCGA-D6-6825-01A	1.92809	0.0927825	0.727592	0.845711	0.713866	2.80396	0.223637	0.11742	2.9753	2.3319	3.06113	2.73821	2.86725	3.89253	2.64969	3.41617	8.36897	7.50149	3.907	4.26614	3.4924	1.4302	0.590191	0.664908	low
TCGA-QK-A8Z7-01A	0.256977	0.141714	0.277184	0.263689	0.0795801	0.474645	0.0362027	0.0525538	3.10905	0.416798	0.233378	0.837865	1.17779	0.750631	1.34727	0.709429	2.05463	3.25236	0.942671	0.838916	1.63902	0.048013	4.8802	0.666092	low
TCGA-CN-A63T-01A	1.60441	0.0600148	0.228098	0.204179	0.309882	1.65067	0.206302	0.152282	3.19418	1.33557	1.65466	2.47143	2.27788	4.67165	2.66649	2.03894	5.43589	6.15427	3.63483	4.55004	3.05072	0.831775	1.12325	0.674391	low
TCGA-CV-7101-01A	0.975396	0.102567	0.182231	0.779424	0.22655	0.657675	0.0361821	0.0221179	3.40929	0.77884	1.86583	0.967427	2.16892	3.54134	1.20353	1.54244	4.06468	4.90313	2.94134	3.21662	2.6137	0.0982301	1.04795	0.677443	low
TCGA-CV-6955-01A	0.816645	0.0183412	0.158449	0.543923	0.730652	0.679611	0.587586	0.0735608	2.29169	0.985917	2.4597	0.800977	1.4563	4.10836	1.17883	2.11647	5.23793	4.67316	3.38973	2.64896	2.78946	0.338304	0.225354	0.678232	low
TCGA-BA-5556-01A	2.31775	0.0798843	0.674766	0.513921	0.63107	1.84857	0.0124363	0.053693	3.51287	1.82868	3.26977	2.19017	2.3849	5.76636	3.13639	3.86579	9.40193	7.93965	4.59973	5.89478	4.99874	1.4607	0.607918	0.68132	low
TCGA-BA-6869-01A	1.06319	0.00573137	0.0884196	0.482845	0.18623	0.565186	0.731728	0.0107963	4.47897	0.714758	1.09601	1.13533	1.06524	1.84186	1.34182	1.34404	4.39604	2.66914	2.56318	3.09938	2.23722	0.5917	1.38012	0.682491	low
TCGA-HL-7533-01A	2.02214	0.0711287	0.248035	0.564157	0.186284	1.02448	0.102506	0.0731603	3.58386	1.84028	5.13809	1.17248	2.39479	4.66428	2.88719	3.1467	8.07714	7.1114	3.93419	4.48152	3.46601	1.69863	0.589622	0.688189	low
TCGA-CX-7085-01A	2.02666	0.194088	0.669785	0.593919	0.760373	2.02444	0.0157097	0.0948223	3.0171	2.22634	3.15978	2.07897	3.03211	4.56371	2.48004	3.33268	6.93613	6.15627	3.90157	4.56559	3.66558	0.689182	1.29924	0.694636	low
TCGA-UF-A7JT-01A	2.84763	0.107839	0.284215	0.542169	0.316249	1.74444	0.238195	0.0275375	4.03654	2.0042	3.97511	2.24017	3.59896	6.86567	4.72861	4.01584	10.2872	6.92817	5.57503	5.40371	4.79633	2.37198	1.574	0.694803	low
TCGA-CR-6492-01A	0.932916	0.0395306	0.161112	0.343071	0.347605	1.05965	0.114479	0.0280851	3.08687	0.793979	2.53931	1.32427	1.71759	3.01697	1.69141	1.55934	6.99191	5.03483	3.39385	3.1595	2.12476	0.675993	1.28648	0.697234	low
TCGA-HD-7754-01A	0.329182	0.0263894	0.0783792	0.76584	0.278575	0.413223	0.427799	0.0453478	2.46524	0.675603	0.741602	0.66373	2.18178	0.540959	0.325711	0.97235	1.71445	1.91576	1.17339	0.76116	1.37771	0.0451278	1.13916	0.698761	low
TCGA-D6-A6EO-01A	0.224173	0.0451399	0.0455018	0.135653	0.113026	0.682227	0.064394	0.0238374	1.9701	0.285454	0.51858	0.87826	0.64922	1.69335	0.77591	0.542373	2.88928	1.96623	1.58695	2.27215	5.25902	0.271034	1.92409	0.699933	low
TCGA-CV-7245-01A	0.423372	0.0157483	0.0296254	0.305333	0.0828372	0.611435	0.018977	0.0148634	1.35452	0.586104	0.552656	0.754821	0.931574	0.425895	0.805658	1.0658	1.09415	1.00961	2.05565	2.24156	2.12829	0.0180569	1.23021	0.700146	low
TCGA-CN-4738-01A	1.83806	0.115082	0.447703	1.38123	0.521554	1.2631	0.0820797	0.0701931	2.87466	1.6039	1.92483	1.81077	2.45327	3.37319	2.25871	2.75366	5.17328	5.32356	2.66589	3.21025	3.2696	0.652339	0.988683	0.702924	low
TCGA-BB-4228-01A	0.734311	0.0546462	0.121105	0.288151	0.13617	1.27163	0.257198	0.0905197	2.29921	0.899301	1.71798	1.26292	2.23328	2.60397	1.21307	2.01216	6.91496	5.27904	2.84321	2.75188	1.83565	0.437644	0.701734	0.704425	low
TCGA-CV-A6JY-01A	0.349426	0.00795157	0.035727	0.138664	0.205452	0.200309	0.060548	0	0.944624	0.314402	0.444705	0.534237	0.745205	0.352927	0.407161	0.538802	1.41953	1.05837	1.11535	1.17928	0.7768	0.0800828	0.481202	0.705536	low
TCGA-CR-7395-01A	2.08005	0.0774784	0.555135	0.469956	0.792504	2.27097	0.050545	0.241469	3.01073	1.8179	3.59452	2.77931	2.82868	4.63075	2.65728	3.19602	8.45717	7.69854	4.67892	4.70627	3.9861	1.64926	1.49703	0.711386	low
TCGA-CV-7263-01A	0.970711	0.0686558	0.283523	0.29634	0.519867	1.43285	0.525247	0.0738966	3.15654	1.05217	0.922545	1.46248	2.69594	1.77848	1.1147	1.51592	4.15335	4.02921	2.87486	2.31701	1.79787	0.295969	0.930188	0.711463	low
TCGA-TN-A7HJ-01A	0.429815	0.0234743	0.230999	0.338238	0.0710401	0.604165	0.215547	0.0148102	2.46627	0.404598	0.744444	0.948665	1.00472	0.610998	0.744356	0.422984	3.43645	1.12423	1.08979	0.805264	0.739462	0	0.888967	0.719057	low
TCGA-CR-6477-01A	0.820454	0.0874955	0.360252	0.37866	0.585683	2.06467	0.292051	0.00997816	3.61966	1.50622	1.58719	2.07809	2.5924	1.22255	1.23413	1.08428	3.91242	2.16112	1.32235	2.16909	1.76718	0.088557	1.50153	0.719404	low
TCGA-D6-A6EM-01A	1.95187	0.0400356	0.189569	0.202979	0.142605	1.83929	0.203268	0.0152405	3.94103	1.49018	2.31804	2.62924	2.72417	5.68838	4.42219	2.96083	9.11222	5.21645	5.99596	5.3659	3.83492	1.68196	1.50965	0.721361	low
TCGA-D6-A4Z9-01A	0.596585	0.072642	0.13903	0.324284	0.217234	1.12651	0.0549666	0.0686352	2.51591	0.681976	1.77998	1.29735	1.52268	2.73074	1.3984	0.887862	6.44077	4.37798	3.52392	2.60692	2.26262	0.747411	0.980363	0.732696	low
TCGA-CN-6996-01A	1.76615	0.0965125	0.465263	0.5355	0.54104	3.00545	0.241752	0.156056	3.35972	1.88025	3.83624	3.14306	3.0508	4.84732	3.25952	2.34347	8.70787	7.54971	4.24617	3.92273	4.01207	1.40888	1.33783	0.734995	low
TCGA-CV-7425-01A	1.56073	0.0234483	0.306787	0.703987	0.203204	1.64916	0.00305232	0.0276149	2.04484	1.41501	3.85977	1.57382	1.91204	2.47409	1.56911	2.46802	8.19843	5.98982	3.77609	2.45732	2.86196	1.14587	1.078	0.741332	low
TCGA-CV-A6K0-01B	1.74532	0.0940152	0.589975	0.930976	0.8294	2.14537	0.372485	0.381843	3.53427	1.67809	3.25134	2.75211	2.69368	3.62941	2.00735	2.9245	7.58731	6.75011	3.55608	3.3555	2.5466	0.699639	1.49528	0.745806	low
TCGA-CR-7393-01A	1.46778	0.140227	0.988466	1.16883	1.38387	1.95821	0.334509	0.0455887	3.17565	2.04646	1.33145	1.61532	2.20572	2.40658	1.67898	3.012	3.49204	4.11397	3.98565	4.20493	3.28338	0.13437	1.90042	0.750249	low
TCGA-CV-7238-01A	1.58823	0.155892	0.322171	0.434284	0.21163	1.19938	0.0474427	0.123959	3.31164	1.4143	1.61791	1.87308	1.83087	2.64898	1.85385	2.67667	5.75416	4.87284	3.88656	2.61893	2.52562	0.544285	1.70448	0.753969	low
TCGA-CV-A45Y-01A	2.06364	0.107924	0.448877	0.706198	0.632785	1.66562	0.395659	0.102039	3.46628	1.98552	2.97625	2.52671	2.77281	3.97562	2.24422	2.32594	6.52696	6.16682	3.84032	3.01903	2.61205	0.618059	1.73915	0.756264	low
TCGA-CV-A6JN-01A	0.900147	0.0201836	0.0453833	0.203233	0	0.954585	0.0380258	0.0928351	2.87662	0.716621	2.2777	2.10655	1.06146	2.48729	2.53614	1.27157	6.05752	3.18574	3.64356	3.71449	1.90122	0.456106	0.794821	0.756877	low
TCGA-CV-A45U-01A	1.50097	0.110777	0.125013	0.481655	0.28535	1.29571	0.0184842	0.0335561	2.53755	1.71371	1.64297	1.9267	1.67775	1.95119	1.95655	2.57001	4.84344	4.09	3.5064	2.94485	2.64943	0.880816	2.02385	0.757133	low
TCGA-UF-A7JJ-01A	2.24481	0.0869993	0.435618	0.431406	0.870872	1.91037	0.0752749	0.201481	3.43521	2.08653	1.61943	2.78682	3.03056	3.09714	2.66336	3.29244	5.09466	4.87405	4.11755	3.43434	3.02144	0.673011	1.76011	0.763028	low
TCGA-CV-6943-01A	2.61286	0.148055	0.605709	0.831542	0.649974	1.90858	0.0686195	0.115923	3.77645	2.16396	3.6436	1.86898	3.12766	6.0182	3.65147	4.75547	8.67841	8.59967	5.07248	4.14369	4.30711	1.57738	1.04129	0.766728	low
TCGA-QK-A652-01A	1.05737	0.0282146	0.403318	0.375048	0.586232	1.50316	0.416745	0.167337	2.88466	1.20996	2.19664	1.91285	1.56521	2.61697	1.48225	1.81007	6.72183	5.63799	3.10978	2.82138	2.00469	0.347043	0.935092	0.767932	low
TCGA-CN-5360-01A	2.69585	0.151712	0.765454	1.00309	0.606825	1.64019	0.431856	0.190318	3.86889	2.40543	3.1495	2.38258	3.07176	3.92914	2.49494	3.5481	5.72509	7.14672	3.51687	4.4331	3.95673	0.897665	1.84204	0.770098	low
TCGA-BA-A6DJ-01A	1.67209	0.0409581	0.159169	0.185149	0.215847	1.66523	0.0393488	0.0549384	2.67616	1.44006	3.66751	2.2358	2.04414	3.95161	2.49562	2.45439	8.94368	6.01027	5.27862	4.2494	3.7481	1.53491	0.946342	0.771513	low
TCGA-CR-7364-01A	0.35342	0.0657796	0.172464	1.13565	0.133416	1.21646	0.453144	0.0251794	2.39841	1.11271	1.45812	1.41685	1.16632	2.39144	1.30577	0.742291	3.21205	3.13092	1.66271	2.10412	1.19964	0	0.990083	0.772783	low
TCGA-IQ-A6SH-01A	1.43832	0.0349103	0.0780064	0.184925	0.0638029	1.41662	0.119171	0.0066527	3.03058	0.903056	1.4568	1.96949	2.02968	4.60057	2.99334	1.7374	7.31792	4.1501	4.69389	4.37935	3.67005	0.653853	1.08465	0.773962	low
TCGA-BA-A4IF-01A	0.283997	0.00686403	0.0384991	0.133953	0.0621519	0.430577	0.0829438	0.0257362	2.25478	0.48935	0.538742	0.62073	0.658325	0.496568	0.594923	0.375342	2.06928	0.87341	2.37994	1.14054	2.53752	0.0466107	0.865969	0.779281	low
TCGA-CQ-5333-01A	3.19294	0.0436752	0.370525	0.78749	0.360324	2.19114	0.176715	0.143264	4.55268	1.92814	2.80573	2.92867	3.90874	6.10089	5.48569	3.20153	9.65369	9.3392	5.46281	4.22224	3.82192	1.65925	0.854411	0.783212	low
TCGA-F7-A61V-01A	0.829905	0.00732654	0.104426	0.149696	0.0823546	0.623639	0.04118	0.0544037	2.11646	0.784077	2.49585	1.11642	0.872289	1.20335	1.05849	1.34766	4.46556	3.05857	2.39244	2.33763	2.93489	0.144257	0.683009	0.7885	low
TCGA-CV-6961-01A	0.655889	0.0618497	0.124387	0.194138	0.113873	0.541708	0.0263052	0.0331553	1.81526	0.712713	1.57859	0.63943	1.82901	4.1619	1.13882	1.34029	6.23368	5.14533	1.84032	3.09175	1.7091	0.129937	0.835475	0.789521	low
TCGA-QK-AA3J-01A	1.04341	0.0221995	0.121592	0.647181	0.147112	0.674558	0.0455387	0.0209547	3.55251	1.04413	0.76248	1.16485	0.975051	1.87842	1.47328	1.23317	3.25011	2.6844	4.47722	3.66725	2.9028	0.6543	0.642273	0.792202	low
TCGA-MT-A67F-01A	2.95489	0.041977	0.796317	1.10555	1.08689	3.16544	0.0820387	0.251386	3.36578	3.12203	5.33165	3.50278	3.49406	5.93846	4.07833	4.55424	9.28767	6.17955	5.83668	6.11693	4.70655	3.0562	1.24211	0.792571	low
TCGA-KU-A66S-01A	1.31576	0.0753748	0.0315648	0.382566	0.225	0.935145	0.0984	0.0263071	3.27663	0.746758	1.04268	5.1601	1.40305	2.73987	1.06383	1.29366	4.4202	3.68022	1.89583	2.24877	4.37789	0.22386	3.70204	0.798296	low
TCGA-CV-A45O-01A	0.804872	0.00713153	0.0788868	0.145897	0	0.758129	0.0220087	0.0529784	1.86105	0.779361	3.41286	1.06882	1.44102	2.37291	1.23868	1.4682	4.14253	3.85403	1.99094	1.9196	1.37337	0.227239	0.481642	0.802612	low
TCGA-UF-A71E-01A	0.0641024	0.0391217	0.0587571	0.270957	0.0151723	0.158598	0.0169857	0.0185883	1.8939	0.122084	2.08744	0.336595	0.632672	0.498098	0.747494	0.379961	0.753654	0.283726	0.960096	0.985662	0.563243	0.0666945	1.4773	0.805529	low
TCGA-CQ-A4C9-01A	0.324027	0.065114	0.100301	0.245979	0.0930012	0.561418	0.343159	0	3.4323	0.419731	2.05562	1.06746	1.70969	0.672311	0.521547	0.71302	2.3314	1.2549	1.21802	1.26678	1.18877	0.0562136	1.96562	0.80875	low
TCGA-CN-A641-01A	0.318761	0.0115567	0.0453395	0.0905401	0.0781713	0.433618	0.00598656	0.0217311	1.56242	0.245463	0.658774	0.631144	0.898672	0.741733	0.649203	0.343823	1.68813	1.83187	0.74759	0.959066	0.590445	0.0394011	0.896382	0.809436	low
TCGA-KU-A6H8-01A	1.30176	0.0422927	0.175477	0.370511	0.200055	0.534079	0.219166	0.0787976	2.12012	0.96263	0.945696	0.866899	1.04664	1.02346	1.73109	2.77421	4.3525	3.26138	3.3583	2.59431	2.40573	0.268822	1.30793	0.813721	low
TCGA-CV-A6K1-01A	0.802567	0	0.102391	0.398705	0.0455386	0.612315	0.178517	0.012556	2.61733	0.925416	0.998278	1.5113	1.39159	2.50778	1.8554	1.26001	3.58293	1.24373	4.34132	3.34396	2.87254	0.327852	1.82711	0.814431	low
TCGA-CR-7388-01A	1.32217	0.247993	0.539825	1.40674	0.709103	1.96855	0.22014	0.0501774	2.81503	1.54994	1.54633	2.14974	2.00906	1.85301	2.01312	2.23503	3.71926	3.84643	2.66371	3.19762	2.48365	0.255438	2.37855	0.817799	low
TCGA-CN-A6V3-01A	1.8922	0.0322424	0.232851	0.727017	0.304151	0.89519	0.07126	0.065161	2.90763	1.22045	2.19515	1.74275	1.73698	5.00291	2.7881	2.67367	8.72608	5.59484	3.63168	4.56819	3.19613	0.851165	0.565008	0.819365	low
TCGA-CR-6472-01A	0.562072	0.0426763	0.205678	0.45494	0.47778	0.743511	0.211398	0.0402992	3.9668	0.855572	0.707798	0.716581	0.802889	2.86766	0.951369	1.24387	3.29999	4.68039	2.32571	2.26502	1.80072	0.207932	1.35167	0.82645	low
TCGA-CV-A6JZ-01A	2.13215	0.0700939	0.484411	0.52441	0.316251	1.76744	0.481703	0.0575682	3.70015	1.81656	2.85466	2.15687	3.42573	4.16186	3.18391	4.35782	7.86464	8.02996	4.69265	4.89005	4.07935	1.74576	0.99796	0.831	low
TCGA-UF-A719-01A	0.556405	0.0550509	0.0500367	0.248462	0.302606	0.53002	0.566204	0.0105504	4.10916	0.445165	1.515	0.607028	0.952063	1.02875	1.35218	0.857828	2.46494	0.561864	2.92327	2.19633	1.54813	0.295875	0.936832	0.833546	low
TCGA-CV-5442-01A	0.502644	0.020998	0.00797437	0.150816	0.109619	0.217469	0.0217073	0.00663703	0.415234	0.359065	1.4441	0.345557	0.575506	0.286801	0.445819	0.485793	0.90399	1.69092	1.13218	1.33621	0.809047	0.324646	0.19251	0.840744	low
TCGA-CV-6936-01A	1.51973	0.0551372	0.112373	0.61996	0.0839747	0.661346	0.0731802	0.0899398	2.27438	1.3204	1.25606	1.00583	1.94697	5.11754	2.27889	2.78811	5.81138	5.35836	3.09633	3.7848	2.92232	0.921506	1.29251	0.841621	low
TCGA-QK-A8Z8-01A	0.453889	0.313048	0.0450409	0.316366	0.119067	0.565784	0.524574	0.0437347	3.80152	0.425738	0.820333	0.871476	0.807324	2.06205	0.857615	0.835961	2.75113	1.22254	2.23076	2.41537	2.05713	0.194573	1.0034	0.843292	low
TCGA-F7-A623-01A	0.848871	0.0195087	0.276227	0.619182	0.210494	1.07086	0.0367619	0.083989	1.79532	0.89944	0.76505	1.59859	1.38166	2.17399	1.68275	1.58002	5.82469	3.40847	2.18729	3.04531	1.92349	0.339801	0.674916	0.849557	low
TCGA-CQ-6222-01A	1.48248	0.0563776	0.283271	0.715331	0.451914	1.09142	0.220121	0.0688509	3.98347	1.56766	3.39872	1.58593	3.22843	4.68733	2.19063	3.0203	5.53377	5.52759	3.61053	3.4956	3.00648	1.06869	0.846562	0.850291	low
TCGA-CV-A460-01A	2.22727	0.139295	0.497186	0.835772	0.971072	2.25204	0.471099	0.227923	4.54465	2.24002	2.06543	2.7069	2.97826	3.46593	3.06039	2.40845	6.30187	5.48914	3.90569	3.76427	2.93664	1.08429	1.01196	0.852746	low
TCGA-BA-A6DE-01A	0.498153	0.0704657	0.0311623	0.131051	0.278878	0.513262	0.27622	0.0156387	2.31073	0.412864	1.44017	0.726772	0.822278	2.3334	1.8199	1.07467	5.66072	3.75651	3.29467	2.34945	2.05443	0.638508	0.811601	0.85871	low
TCGA-CN-4733-01A	2.81571	0.343034	1.10264	0.990295	0.836886	3.36743	0.301221	0.0885693	3.95209	2.8595	2.83979	3.14419	3.15432	5.07815	3.73744	4.42989	8.5336	7.02713	5.41502	4.20725	4.55553	1.09578	1.70721	0.863774	low
TCGA-CV-5441-01A	0.793154	0.0404326	0.0973994	0.0923739	0.135381	0.692222	0.366247	0.0128389	1.85776	0.663305	1.98867	0.783595	1.08584	1.25255	1.58896	1.4675	3.06709	3.21162	2.64743	2.24195	1.74818	0.155945	1.80484	0.865964	low
TCGA-D6-6826-01A	1.04542	0.149806	0.291587	0.757547	0.281612	1.40137	0.0718352	0.025208	2.84805	0.961981	1.58469	1.62279	3.02911	2.10011	1.12856	1.76894	5.26002	3.77968	2.62516	2.21172	2.5039	0.232121	1.83619	0.869579	low
TCGA-CR-7374-01A	1.0534	0.166823	0.508364	0.605432	0.666774	1.64276	0.24223	0.0871618	3.27817	2.11436	0.787982	1.91081	1.16147	1.84341	1.33723	1.88471	2.10823	2.75649	2.15368	2.55476	2.35371	0.112571	3.25028	0.869724	low
TCGA-CR-7398-01A	0.514	0.042939	0.246106	0.364362	0.028454	1.14913	0.0255258	0.0233094	1.17459	0.510805	0.863417	1.45935	1.96415	2.18458	1.34795	0.821192	4.35837	1.78116	1.03743	2.21882	3.27344	0.0422441	2.14362	0.871018	low
TCGA-F7-A50J-01A	0.711873	0.0159123	0.104969	0.244379	0.106723	1.19121	0.167719	0.101985	1.83333	1.34174	2.47266	1.5778	1.05789	4.03258	1.2446	2.32531	6.40619	5.20105	3.11644	3.09546	1.49875	0.63562	1.0075	0.873362	low
TCGA-CN-4735-01A	1.72901	0.0906395	0.299163	0.929879	0.355371	1.33809	0.283082	0.287173	5.62636	1.64097	1.90474	1.63775	3.24293	3.84196	2.56195	2.06426	5.6837	6.94085	4.09234	3.20498	2.8032	1.33222	0.572439	0.880993	low
TCGA-CN-4722-01A	0.500569	0.0417332	0.175031	0.479157	0.364962	0.562572	0.108047	0.0198386	1.47762	0.739211	0.542847	0.415521	0.680359	0.39622	0.440837	1.23027	1.38346	1.10495	1.78382	0.896287	1.25711	0.0711018	1.25581	0.881406	low
TCGA-CQ-6223-01A	1.0089	0.0132468	0.138986	0.30382	0.399769	0.775384	0.158399	0.0207767	2.20196	0.720448	1.88714	1.23643	1.37269	3.10743	0.915281	1.2029	6.24955	4.82345	2.56501	3.10928	2.39045	0.225718	0.35388	0.881554	low
TCGA-D6-6516-01A	1.2657	0.0612258	0.182962	0.315431	0.0931464	1.24413	0.0606831	0.0483563	2.55399	1.12024	2.63209	1.1884	1.79116	4.19366	2.75167	2.65203	6.08759	4.8923	4.07113	3.92017	3.59347	0.675329	0.966985	0.885628	low
TCGA-QK-A6VC-01A	1.21277	0.1124	0.483588	0.925249	0.607427	1.86631	0.213114	1.31215	3.96812	1.86251	2.00967	2.39289	2.10784	6.31562	2.30102	2.78316	7.37869	5.20878	3.20693	3.41892	2.42513	1.30395	0.972121	0.88846	low
TCGA-D6-6515-01A	2.13639	0.109583	0.603239	3.18734	0.774194	1.95507	0.142796	0.17195	4.09534	2.15458	3.73421	1.98469	3.26674	5.67986	3.30749	3.50905	9.6413	6.94806	4.86168	3.18438	3.30826	0.993929	1.10422	0.895048	low
TCGA-CN-4723-01A	1.22896	0.0852993	0.186702	0.477573	0.189735	1.62102	0.183711	0.128801	2.75524	1.3864	1.77264	2.06256	2.1302	3.22049	2.17643	1.99998	5.89841	6.26129	2.55877	2.75417	2.52026	0.583021	1.65038	0.898747	low
TCGA-HD-8634-01A	0.518698	0.0674785	0.0596867	0.214073	0.198282	0.729329	0.0275152	0.049825	1.95653	0.442469	2.78608	0.847786	0.950432	2.99228	1.16413	0.918484	7.6941	4.41921	1.33466	2.61041	1.46505	0.242641	0.752351	0.898805	low
TCGA-CN-6992-01A	0.780377	0.0478534	0.302149	0.625921	0.319192	0.667304	0.206344	0.0207177	2.78594	1.04378	2.37755	1.11389	1.56894	1.05943	0.816731	0.911394	2.5574	2.5808	1.74773	1.9759	1.67888	0.116947	4.03163	0.902028	low
TCGA-CN-6021-01A	0.953586	0.0665714	0.336224	0.204295	0.258412	0.579276	0.20642	0	2.47071	0.753559	0.622802	0.534394	0.938213	0.535398	0.726336	1.42423	0.920225	1.34853	1.99644	1.53333	1.65128	0.134279	1.74485	0.905676	low
TCGA-CV-A465-01A	0.196092	0.0185679	0.0348997	0.0781115	0.0701422	0.317784	0.072236	0.0462698	1.26902	0.127162	0.517933	0.396135	0.629779	0.987452	0.243246	0.297688	3.04996	2.46455	1.03778	0.535145	0.44067	0.083325	0.597889	0.915068	low
TCGA-CV-7427-01A	1.51391	0.0530089	0.371028	0.687155	0.394033	1.93391	0.149342	0.115654	2.71154	1.62506	4.57745	2.06221	2.59017	7.39284	2.27281	2.9473	10.117	8.50357	4.3587	3.98481	3.46222	1.37459	0.561321	0.918275	low
TCGA-T2-A6WZ-01A	0.762071	0.0278512	0.107523	0.14359	0.0320881	0.594416	0.0709248	0	2.30263	0.575096	1.10699	1.08273	1.29296	0.819209	1.45334	1.03269	3.2018	1.75973	3.00712	3.20561	1.7039	0.138363	0.681013	0.922135	low
TCGA-MT-A67D-01A	0.789124	0.0513748	0.35915	0.268266	0.504147	1.26351	0.213272	0.0544734	2.87734	0.879024	1.72999	1.85124	1.54993	1.83338	1.17769	1.48741	4.61615	3.32307	2.36896	3.329	1.57145	0.149518	1.26827	0.927035	low
TCGA-BA-5558-01A	1.56921	0.0779509	0.160323	0.354103	0.0837748	1.48002	0.0191966	0.039752	2.61472	1.214	1.48646	1.93846	2.12757	3.31494	2.38265	2.20433	6.31514	4.83709	2.95793	3.57285	3.57157	0.606347	1.69575	0.927393	low
TCGA-CV-A45P-01A	0.58532	0.0378112	0.0215635	0.130991	0.0291725	0.609953	0.214345	0.0705414	1.84467	0.497034	1.31658	0.992158	0.673712	1.97272	0.897085	0.885736	5.09666	3.76958	2.20536	1.92653	1.61599	0.497103	0.910983	0.931392	low
TCGA-BA-A6DD-01A	1.80547	0.0748186	0.356028	0.182809	0.3925	1.28815	0.198629	0.101718	3.36404	0.945644	1.38958	1.97402	2.12443	4.63402	2.66554	2.91419	7.90206	6.62284	4.04647	3.98549	3.25694	0.779307	1.07763	0.942406	low
TCGA-CN-6017-01A	2.56367	0.187606	0.663642	0.829149	0.760731	2.54677	0.143664	0.142389	4.2146	2.61693	3.48692	2.51189	3.31632	5.7448	4.0288	4.47364	8.23113	7.20892	5.07942	5.49852	5.01856	1.19835	1.40815	0.946853	low
TCGA-CR-7397-01A	0.94356	0.0742139	0.365649	0.330717	0.604527	1.07771	0.34814	0.0386704	2.88034	1.13912	0.978071	0.99066	2.12745	2.22194	1.17057	1.41203	6.10736	5.36402	1.93957	1.75766	1.79804	0.114501	1.63192	0.948531	low
TCGA-CQ-5331-01A	2.05781	0.101774	0.406723	0.494908	0.669342	1.94066	0.00388897	0.119296	3.38826	1.94015	3.13469	1.81327	2.59139	5.96759	3.41458	3.03114	9.55578	8.75435	4.67098	4.66392	3.9344	1.60404	1.31959	0.949303	low
TCGA-CR-7392-01A	1.56807	0.160549	0.606815	0.615328	0.718211	2.41434	0.16571	0.0330011	3.22329	1.85869	2.58764	2.21342	2.46598	3.94935	2.6698	3.20165	6.7666	6.30635	4.00813	3.12752	3.22388	0.869744	1.84632	0.949688	low
TCGA-CN-4728-01A	1.24051	0.0998481	0.320317	0.638514	0.347518	1.73065	0.0218432	0.0284082	4.15176	1.89716	2.3248	2.19167	3.82361	2.71392	1.38925	1.97021	5.18387	5.13915	2.55178	2.29521	1.92221	0.383762	1.40946	0.949886	low
TCGA-CV-7406-01A	0.13901	0.0465379	0.130958	0.574255	0.0824863	0.187245	0.102253	0.0294476	4.21798	0.266771	0.928633	0.349105	1.16651	1.25482	0.292669	0.445147	1.76117	1.84032	0.564002	0.95735	1.29077	0	1.01502	0.95081	low
TCGA-MT-A7BN-01A	1.6338	0.0356934	0.155283	0.123873	0.450063	0.778019	0.526401	0.0225544	3.48802	1.06099	0.909062	2.50426	3.14579	2.103	2.98752	2.17827	3.64289	4.37267	3.6855	4.96792	2.97323	0.732158	1.20939	0.95874	low
TCGA-CQ-7063-01A	2.21617	0.047579	0.266412	0.594574	0.301143	2.32056	0.0572056	0.276082	3.07911	1.87718	4.53671	2.79623	2.54329	5.12546	3.05165	3.22892	9.08636	8.05331	3.90901	4.28657	3.83482	1.86978	0.794548	0.960576	low
TCGA-CQ-7065-01A	0	0	0.0251013	0.0872062	0	0.0435751	0.017211	0.0104941	1.20711	0.00766401	0.488285	0.0219109	0.168214	0.382325	0.117602	0.0506212	1.92606	0.582368	0.125287	0.171799	0.2765	0.0190873	0.739813	0.963683	low
TCGA-H7-A6C4-01A	0.723757	0.0237958	0.178917	0.192647	0.31018	0.982195	0.00618912	0.0717589	2.24318	0.889796	3.2415	1.72715	1.5596	1.8643	0.781383	1.54067	6.0673	5.08431	1.80572	3.20804	1.54909	0.228672	0.830117	0.965333	low
TCGA-CV-7250-01A	1.07088	0.00694522	0.076875	0.284071	0.276893	0.749184	0.17917	0.0260386	3.55165	0.755011	1.60601	0.872126	1.53287	4.94233	1.46184	1.74881	2.92733	3.10166	2.54683	3.08257	2.34945	0.567314	0.930662	0.971002	low
TCGA-IQ-A61G-01A	0.177936	0.0189703	0.0143665	0.105408	0.126487	0.890087	0.0228543	0.0179054	1.69906	0.338266	0.59777	1.06404	1.11257	0.643047	0.772529	0.327152	4.84703	1.16498	2.01502	1.49022	0.670245	0.105601	0.657059	0.972006	low
TCGA-F7-A620-01A	1.95635	0.0603492	0.368149	0.261548	0.285773	1.83423	0.0210873	0.17616	3.25667	1.61743	3.4858	2.23803	2.39901	6.30939	3.33038	2.79878	10.6401	7.87464	5.65786	5.75505	4.64848	1.63591	0.798615	0.972713	low
TCGA-D6-A6EQ-01A	0.913134	0.0329894	0.118038	0.128471	0.0566277	0.889477	0.0383052	0.0840844	2.79858	0.96154	1.01933	1.88717	1.7395	2.44722	1.66985	1.43012	5.28073	4.96231	3.32642	3.15174	2.00504	0.503892	1.56682	0.973357	low
TCGA-CN-4725-01A	0.0504578	0.0128871	0.024264	0.0456032	0.0585402	0.61896	0.0654207	0.0322076	1.0836	0.168044	0.978767	0.665056	0.864641	1.15993	0.368891	0.34389	2.60566	1.76676	0.171526	0.990267	0.369596	0.0147783	0.943774	0.975528	low
TCGA-CR-7377-01A	1.83942	0.0641012	0.676744	0.64422	1.06821	1.46561	0.335714	0.109882	3.68265	2.14441	2.37911	1.52267	2.82822	3.2462	2.45257	3.71742	6.07796	7.17019	4.31347	3.98275	3.69074	0.494734	1.39157	0.979724	low
TCGA-CV-5431-01A	2.82358	0.191944	0.605424	0.769955	0.813777	2.11205	0.530334	0.194834	3.56656	2.55745	2.48769	2.47157	3.26074	4.08413	3.40253	3.4127	4.89456	6.53885	4.32532	3.9305	3.48277	1.95006	1.31957	0.981111	low
TCGA-CQ-5325-01A	2.20349	0.0983203	1.21124	1.05451	0.996088	2.0376	0.0231927	0.112807	3.7402	1.96229	5.04656	1.8433	3.26867	4.89806	3.67383	4.03465	8.99604	7.10557	5.30442	5.28296	4.47588	1.32808	1.30855	0.98401	low
TCGA-CV-7099-01A	1.19881	0.0588045	0.17902	0.984249	0.0543642	1.46856	0.0397866	0.0224758	3.75829	1.3806	3.33322	1.73491	2.62051	7.51837	2.46785	2.62185	8.56168	6.21632	4.24866	3.84812	3.49364	0.803002	0.363383	0.985311	low
TCGA-CV-A6JT-01A	0.891199	0	0.0550249	0.204746	0.0162115	1.15981	0.00728671	0.115254	3.03898	1.06734	2.2261	1.8808	1.68151	2.28647	2.0252	1.63838	5.03306	3.46192	3.27524	2.723	1.75798	0.382322	1.52261	0.985676	low
TCGA-UF-A7JS-01A	0.771593	0.0810879	0.106349	0.40135	0.20871	0.972581	0.463231	0.101291	3.71287	0.65727	0.755716	1.88253	2.14753	1.55229	3.72423	0.637756	4.79335	1.83421	4.77575	4.01069	3.05633	0.221394	1.45895	0.990502	low
TCGA-CV-A45Z-01A	1.62788	0.0581538	0.302471	0.738131	0.236308	1.3451	0.0747322	0.068343	3.98987	1.47158	2.32616	1.98522	2.5778	4.03653	2.28061	1.90792	6.05887	4.99433	4.55305	3.56844	2.64565	1.30399	1.90819	0.991618	low
TCGA-BA-A4IG-01A	1.56867	0.114518	0.559433	0.329137	0.808985	1.02372	0.290487	0.0611596	2.50025	1.17874	1.3078	1.61381	1.43286	2.74812	1.27314	1.86494	4.98935	4.48455	3.02621	3.20755	2.31819	0.590336	0.962001	0.992233	low
TCGA-C9-A480-01A	0.810621	0.0550247	0.102306	0.251165	0.0284794	0.764237	0.117518	0.139983	1.50028	0.864508	2.03236	0.917263	1.4046	2.92253	1.58653	1.74309	6.41774	5.10387	3.00907	2.58646	2.07114	0.700052	0.667959	0.993262	low
TCGA-CR-7380-01A	0.471673	0.0278578	0.186762	0.393995	0.407296	1.0088	0.121948	0.0132093	2.10241	0.836063	1.43642	0.871124	1.64258	1.10228	0.679787	1.3956	3.50122	3.76695	1.87765	1.39083	1.39906	0.0476219	1.4959	0.996143	low
TCGA-MT-A51W-01A	0.826377	0.012726	0.0568537	0.162104	0.0578198	0.649696	0.0131571	0.0474523	2.04859	0.625575	2.48272	1.13199	1.06948	4.34491	1.63652	1.79657	6.9602	4.40382	3.71979	3.95609	2.77602	0.971425	0.767617	1.00211	low
TCGA-CN-A498-01A	1.11335	0.0382493	0.191816	0.299582	0.114588	1.19209	0.127771	0.0479562	1.70953	0.981174	2.21637	1.33024	1.36152	2.39839	1.42737	1.77532	6.89484	6.61111	2.87214	2.4377	1.94029	0.593303	0.471095	1.00276	low
TCGA-CV-7180-01A	0.418625	0.0355683	0.0162449	0.0899365	0.186805	0.447878	0.0221703	0.00677935	1.00005	0.473348	0.651393	0.352147	0.548158	1.00559	0.674371	1.36961	4.84455	3.10197	2.12041	2.27124	1.30953	0.290909	0.49181	1.00309	low
TCGA-HD-A633-01A	0.242528	0.0110538	0.0372692	0.0353082	0.0626359	0.279022	0.0171089	0.00522528	1.34208	0.280283	0.682111	0.630067	1.10918	0.313006	0.257287	0.235713	1.13285	1.04627	3.02867	1.30697	1.23597	0.0189742	0.78195	1.00672	low
TCGA-CN-6012-01A	2.0403	0.144894	0.368489	1.3568	0.467923	1.31694	0.564227	0.0799224	3.75294	1.33561	2.01616	1.77312	2.21688	3.39534	2.21556	2.25668	4.97124	5.81704	2.76149	3.3111	3.08613	0.603665	1.56358	1.00723	low
TCGA-CV-6436-01A	2.56401	0.00520799	0.0408382	0.178908	0.212337	0.715534	0.141219	0.0906248	3.11682	1.33405	1.92242	0.916042	2.01916	3.66034	3.72857	3.46625	8.27983	6.10826	5.75139	5.69608	3.62105	2.06596	0.762722	1.01064	low
TCGA-CV-6938-01A	2.04906	0.0105786	0.191431	0.865389	0.267591	1.69078	0.246642	0.0779953	3.8597	1.77041	4.47188	2.00469	3.35609	6.58733	3.76893	3.57121	9.62596	7.46791	4.94753	4.19196	3.7412	1.93062	0.430867	1.01216	low
TCGA-CQ-7068-01A	2.64552	0.0536872	0.383956	0.739737	0.523525	2.08411	0.422627	0.095308	3.90172	2.38106	4.87002	2.50847	3.21861	7.38086	4.62243	4.14852	10.822	8.57136	5.27059	5.73046	4.79996	2.06758	0.548578	1.01264	low
TCGA-BA-5152-01A	1.3026	0.0234291	0.465362	0.340993	0.203047	2.52781	0.0519717	0.082997	3.67785	1.63755	2.18003	2.51115	2.5599	4.79074	2.83595	2.64714	7.02204	4.35319	3.91192	4.23755	3.43089	0.259747	0.653631	1.01577	low
TCGA-CQ-5327-01A	2.02407	0.0562589	0.334092	0.488789	0.267745	1.1543	0.191099	0.10439	3.13926	1.41512	2.25951	1.5123	2.91565	6.00267	2.97611	3.22114	8.52258	6.76973	4.44666	4.05981	3.65233	1.25348	0.864307	1.01918	low
TCGA-CV-5973-01A	0.209641	0.0211739	0.0397665	0.138216	0	0.507801	0.169736	0.0133549	1.56917	0.446795	1.0259	0.708034	0.881274	0.303883	0.266465	0.0797896	4.14512	1.30928	0.570856	0.450094	0.296705	0	0.659236	1.02063	low
TCGA-CR-7376-01A	2.71927	0.122996	0.749577	1.31694	1.49891	2.62868	0.0648982	0.116321	4.03523	2.36534	3.11209	2.69635	3.57319	4.97967	3.21365	3.73732	8.09371	8.60622	5.49632	4.37696	4.2473	1.91806	1.30706	1.02079	low
TCGA-F7-8489-01A	1.8774	0.0416765	0.384958	0.790875	0.559197	2.4588	0.0473114	0.172753	2.91506	1.86036	3.31134	2.87157	2.20333	4.30506	2.079	2.70017	7.57604	7.02707	4.00595	4.14894	3.52293	0.977185	0.999137	1.02251	low
TCGA-CN-4736-01A	1.73399	0.0759731	0.35957	0.708576	0.508254	2.09884	0.204995	0.0445977	3.89247	1.75554	3.2277	1.84783	3.24235	4.98389	2.97656	3.00985	8.59773	8.38288	5.63551	3.99377	3.99537	1.38847	1.27175	1.02759	low
TCGA-IQ-7632-01A	0.247861	0.0336891	0.0605644	0.0361428	0.10612	0.327325	0.0348219	0.0318071	1.19746	0.355855	0.77314	0.398083	0.437415	1.52781	0.332659	0.91739	4.43441	3.36039	0.484313	2.8521	0.644279	0.0687403	0.590806	1.03321	low
TCGA-CR-6488-01A	0.721778	0.0712353	0.284686	0.44223	0.449942	1.11156	0.274236	0.101956	3.41307	1.19192	1.7258	1.66101	3.11533	1.07478	1.15204	1.64244	2.61479	2.73206	2.63387	2.03862	1.85547	0.143456	1.75687	1.03577	low
TCGA-BA-5151-01A	0.601712	0.0367965	0.208251	0.343767	0.478668	1.39726	0.00960251	0.0484093	2.25987	0.865207	1.9311	1.33199	1.52146	2.66401	1.13622	1.34033	4.57382	3.19901	1.82555	2.00887	1.92271	0.122914	1.39087	1.0487	low
TCGA-UF-A7JH-01A	1.29284	0.0863207	0.156898	0.173363	0.602489	1.36619	0.187642	0.0984775	2.7388	0.848321	1.10488	1.81809	2.35247	2.8707	2.42627	1.80324	6.22869	5.18869	2.52381	2.20137	1.79212	1.75719	1.39983	1.04969	low
TCGA-T2-A6X2-01A	1.18224	0.0409082	0.0348706	0.137986	0.0927094	0.985697	0.204664	0.0290678	1.87985	1.25754	1.80844	1.58746	1.95494	3.76372	2.31779	2.44322	8.25667	6.90186	4.15608	3.7685	3.53765	1.1297	1.37307	1.05202	low
TCGA-CV-7100-01A	1.82238	0.0962439	0.179396	0.296219	0.385319	1.0485	0.340428	0.0773475	4.14105	1.41852	2.39285	1.10737	2.19896	7.8276	2.45552	2.73235	9.68365	7.4842	4.63481	3.87191	2.90817	1.08023	1.12499	1.05857	low
TCGA-D6-6824-01A	1.11015	0.0958924	0.415152	3.30929	0.636995	1.50897	0.181719	0.0409903	3.92222	1.26043	1.64696	1.31917	2.68744	4.63116	1.58553	2.83972	5.05174	4.83979	4.28662	3.31665	3.23792	0.351656	1.48561	1.05985	low
TCGA-CV-5444-01A	1.28006	0.0976385	0.301671	0.343142	0.127413	1.66919	0.131821	0.0665229	3.7336	1.56009	1.83915	1.99902	3.0701	3.26661	2.64378	1.6459	6.19631	6.39699	4.5529	2.96753	3.43389	0.445273	1.55628	1.06282	low
TCGA-D6-A6EN-01A	2.50429	0.0080523	0.220388	0.623759	0.0548457	1.94083	0.127766	0.0450032	4.28864	2.19394	3.37977	2.73482	3.87796	7.00194	5.56889	4.10406	8.0468	5.82023	6.95403	5.28805	4.61066	1.98814	0.994658	1.06368	low
TCGA-CV-A45V-01A	1.08047	0.0360685	0.134381	0.315737	0.316569	0.9068	0.184119	0.0340552	2.3904	1.05451	2.39604	1.17106	1.57591	5.04145	1.63456	1.67917	4.78237	4.10445	3.65405	3.40386	2.87785	0.763162	1.45021	1.06386	low
TCGA-CV-A45X-01A	0.230881	0.0438797	0.0976799	0.555587	0.0170348	0.518483	0.190348	0.0346126	1.57123	0.474827	0.57902	0.953497	1.01926	0.482421	0.326806	0.47095	3.25301	2.25485	0.920826	1.53437	0.579156	0.0502409	0.653282	1.06532	low
TCGA-CV-7089-01A	0.783723	0.0260065	0.184165	0.665337	0.171113	0.816604	0.0662918	0.039082	3.04962	0.692488	2.48943	1.08084	1.47531	1.82184	1.28543	1.48582	5.73182	3.89357	2.59299	2.56269	2.15942	0.307955	0.733688	1.0663	low
TCGA-CV-6441-01A	0.233646	0.0785826	0.015186	0.990435	0.0307321	0.0929611	0.0241539	0.624229	2.41146	0.107115	0.607644	0.0393908	1.08822	7.7708	0.400573	0.538179	2.89471	1.1182	2.52303	0.988599	1.01359	0.0229848	0.380427	1.06962	low
TCGA-IQ-A61J-01A	1.22547	0.0347629	0.15737	0.544263	0.526931	1.07167	0.0418339	0.137129	2.3668	1.25573	2.04697	1.70446	2.0975	1.57064	1.12218	1.49315	5.32662	5.29387	2.82794	2.63368	2.03111	0.588563	0.979995	1.06989	low
TCGA-HD-8635-01A	0.731591	0.0339129	0.165292	0.513777	0.380599	0.547836	0.0479815	0.0240803	1.78936	0.600046	1.85192	0.645715	1.51343	1.713	0.899031	1.66984	4.47257	3.37975	3.5869	2.28908	2.47394	0.140584	0.699956	1.07072	low
TCGA-CN-5359-01A	1.62159	0.144545	0.662354	0.627191	1.06125	2.05241	0.550723	0.132673	3.48548	2.08546	1.99453	2.01962	3.18964	2.81608	2.47368	3.19625	5.13333	5.62791	3.38793	3.414	3.32929	0.47036	1.31673	1.07213	low
TCGA-CR-6491-01A	0.721354	0.0169553	0.0506821	0.225584	0.125566	0.743872	0.0576198	0.0106883	1.23646	0.694653	0.483565	0.917243	0.898693	1.94395	1.05377	1.54984	4.2478	3.69578	2.77407	2.65911	2.31164	0.39178	0.834962	1.07506	low
TCGA-CN-4730-01A	0.137432	0.0111411	0.0559809	0.017902	0.0507165	0.206164	0.0594725	0.0105141	1.34899	0.19083	0.343728	0.252972	0.613337	1.1317	0.416896	0.204218	1.67066	2.21475	0.610901	0.591504	2.4035	0.0191237	0.609444	1.07691	low
TCGA-CV-7178-01A	1.27732	0.0412052	0.223981	0.320634	0.43998	1.08938	0.0680068	0.0684624	3.23344	1.41015	1.01336	1.32711	2.77265	2.50207	1.99649	2.80634	5.72687	5.97476	3.57487	2.73209	2.83522	0.377648	1.4048	1.08203	low
TCGA-CN-5355-01A	0.596369	0.0484579	0.245008	0.187213	0.243583	0.405887	0.129864	0	1.5427	0.535449	1.50004	0.886168	1.26895	1.18506	0.619532	0.380917	2.5834	2.60319	1.2561	0.953178	1.25577	0.037216	1.78531	1.08306	low
TCGA-IQ-A61E-01A	0.855384	0.033438	0.0964568	0.118497	0.0308926	1.59556	0.0345625	0.025311	2.34131	1.31513	2.57391	2.11122	2.05602	2.11588	2.17003	2.01664	7.72814	5.62303	4.7665	3.9353	3.32885	0.472447	1.04947	1.08844	low
TCGA-CV-7428-01A	1.79363	0.0389664	0.134336	0.417879	0.345694	1.23745	0.0849659	0.0522792	2.51195	1.53377	2.61957	1.64489	2.39959	4.94491	1.9999	2.62035	8.93702	6.90085	3.8744	4.02842	3.11153	1.06391	1.04131	1.09215	low
TCGA-D6-6823-01A	0.277687	0.0400659	0.0586913	0.0723172	0.0908334	0.545783	0.0895823	0.00764625	1.26119	0.248585	0.861014	0.719041	0.815979	1.94202	0.430545	0.495088	3.4713	3.30413	1.18139	2.04021	1.08927	0.0947238	1.26558	1.09516	low
TCGA-CN-4727-01A	0.0867162	0.029732	0.00849264	0.549848	0.0172274	0.220385	0.112022	0.00706859	0.941561	0.193255	1.12755	0.353873	0.439094	0.129227	0.201621	0.140266	0.474846	0.203334	0.642977	1.13168	1.21817	0	1.56139	1.096	low
TCGA-CV-7255-01A	0.0593977	0.00381642	0.0129443	0.0404604	0.174233	0.144017	0.142847	0.00360114	1.24036	0.0768373	1.2171	0.1369	0.455022	0.268259	0.12065	0.138628	2.84141	1.04122	2.02893	1.15061	0.921542	0.0643222	0.341551	1.09725	low
TCGA-P3-A6T7-01A	0.654788	0.0527399	0.0268257	0.0190988	0.0272864	0.336086	0.0574696	0.0498119	1.90588	0.621288	2.74336	1.01634	1.22972	3.5196	1.33087	1.37269	6.57036	5.52909	2.31546	3.23214	1.99692	0.329239	0.977905	1.1038	low
TCGA-CN-4737-01A	0.467402	0.0571044	0.159662	0.271584	0.142119	0.675712	0.0428579	0.065656	2.56035	0.564308	0.849058	1.00828	1.769	0.797715	0.647347	0.561903	2.04792	2.30869	0.64902	0.950986	1.00154	0.0221104	1.59539	1.10889	high
TCGA-CR-7367-01A	1.04802	0.0697011	0.364817	0.362532	0.46297	0.935234	0.0183435	0.0125785	2.38664	0.921792	1.39125	1.1883	1.87447	1.57194	1.28627	2.24191	4.1609	4.61113	2.38871	2.41913	2.19319	0.0601866	1.23866	1.11212	high
TCGA-CV-7413-01A	0.867311	0.0205271	0.118128	0.399748	0.158001	1.12141	0.0447264	0.0852109	2.70269	1.19211	1.41347	1.55653	1.97164	3.11136	1.57812	0.99426	4.90051	4.49335	2.89114	1.66529	2.27716	0.151853	1.04884	1.11483	high
TCGA-D6-8569-01A	0.903503	0.0378771	0.16438	0.535937	0.147215	1.44838	0.198937	0.0179929	3.05495	0.937822	1.83152	1.7461	1.53901	4.20512	1.77704	1.27477	6.17551	4.06647	2.8369	2.79263	2.15557	0.474263	1.23585	1.11763	high
TCGA-CV-7411-01A	0.438746	0.0145598	0.121941	0.105998	0.149562	0.342546	0.0299501	0	1.18131	0.429533	1.11073	0.560509	0.815797	0.837439	0.380215	1.08116	3.34167	3.06217	1.45646	1.62754	1.27563	0.113002	0.795767	1.12166	high
TCGA-QK-A6VB-01A	0.136206	0.0254939	0.0116216	0.0805605	0.0118222	0.0481168	0.0105993	0.0144877	3.12367	0.085919	0.2763	0.107787	1.14694	0.628145	0.657441	0.406007	1.63118	1.77741	0.66477	1.20369	0.75728	0.0349897	0.868504	1.12722	high
TCGA-CV-7235-01A	1.41522	0.114232	0.269748	0.432401	0.180278	1.36035	0.192465	0.159134	3.04699	1.56133	1.37504	1.7108	2.64796	4.75939	2.6726	2.60108	6.83241	5.60196	5.05529	4.27625	3.45147	0.854735	1.85211	1.13029	high
TCGA-CN-A63W-01A	0.505172	0.0347677	0	0.0796296	0.0790031	0.491604	0.480414	0.0165064	2.22321	0.748498	0.763075	0.666262	1.05964	1.97926	2.11435	1.34932	6.08181	4.10014	4.06931	2.76526	2.16927	0.462433	1.10482	1.13198	high
TCGA-CQ-7071-01A	1.12924	0.0205813	0.134582	0.53347	0.261759	1.3754	0.193606	0.0449285	2.13356	1.16752	2.20557	1.62479	1.88041	3.91493	1.77879	1.76248	6.97649	6.22745	3.96356	3.18106	2.52282	1.29331	0.80415	1.13764	high
TCGA-CV-5430-01A	1.40685	0.105989	0.456743	1.04551	0.449286	1.21991	1.01341	0.370987	4.5649	1.75945	1.00399	1.43557	2.63001	7.68752	1.52742	2.34288	7.05156	5.5647	2.74268	2.76242	2.17703	0.35909	0.80768	1.13785	high
TCGA-UF-A7JK-01A	0.0749605	0.0382798	0	0.14266	0	0.0719693	0.222585	0.0145667	0.858321	0.0627075	0.813511	0.0747538	0.271986	0.124184	0.112585	0.192465	1.5256	1.16521	0.540031	0.233628	0.169385	0	1.0701	1.13886	high
TCGA-CV-7407-01A	0.792594	0.0607497	0.051836	0.441368	0.125619	1.4323	0.023861	0.161377	3.68435	1.22174	2.99501	1.71167	2.7081	5.78075	1.86419	1.62875	5.92578	4.68813	4.46899	3.56195	3.19351	0.244971	0.63538	1.14058	high
TCGA-BA-A6DA-01A	0.652735	0.0294237	0.0977538	0.288346	0	0.1491	0.287067	0.0185778	1.62598	0.317135	0.818945	0.638716	0.955117	1.4353	1.07213	0.873485	5.67464	4.11281	1.77228	2.7517	1.02445	0.360335	1.04293	1.14284	high
TCGA-CV-7183-01A	0.137961	0.00606978	0.0205488	0.0258909	0	0.120202	0.132131	0	0.861377	0.184483	0.59244	0.0818458	0.40126	0.321201	0.245023	0.585981	2.00234	2.1854	0.396584	1.02849	1.53485	0.158483	0.720728	1.15257	high
TCGA-CV-5439-01A	1.24319	0.0239092	0.14923	0.323317	0.254367	0.875354	0.325054	0.0281569	1.74869	0.917353	1.7329	1.06397	1.53467	4.10577	1.02679	2.18056	5.20138	3.86897	2.55073	2.85689	2.04907	0.615534	0.3083	1.15281	high
TCGA-CV-6956-01A	0.077463	0.019923	0.0225751	0.0284388	0	0.0210471	0.0839427	0	0.916659	0.0762077	0.657351	0.0131656	0.304533	0.192871	0.693216	0.0305373	1.26588	0.882898	0.231328	0.512977	0.280661	0.0228386	0.751379	1.15917	high
TCGA-CN-4734-01A	1.62082	0.0475595	0.230405	0.310239	0.290932	1.76165	0.00830896	0.025125	2.30305	1.79544	3.05472	2.20905	2.45803	5.2157	2.71685	3.26914	8.07199	6.75676	4.2877	4.30995	3.62575	0.802019	1.02203	1.15946	high
TCGA-CR-7373-01A	1.90836	0.0470428	0.374687	0.339074	0.288019	2.44281	0.00821747	0.0637404	3.17068	1.44838	3.44989	3.17887	2.70504	4.86057	3.25392	2.50226	7.75474	5.39676	5.40961	5.03528	4.64513	1.66355	0.799259	1.1636	high
TCGA-UF-A7JA-01A	0.566693	0.108998	0.0794855	0.560673	0.114125	0.253708	0.11748	0	1.58491	0.59997	0.789273	0.770223	1.02161	0.93911	0.873458	1.12789	3.52747	2.57978	1.47169	2.21617	1.25884	0.0691809	1.00164	1.16409	high
TCGA-CV-7091-01A	0.861258	0.0249518	0.0939298	0.182531	0.358183	1.11575	0.0661271	0.0328689	1.8557	1.04547	1.92705	1.49664	1.44926	1.83801	1.00384	1.85793	7.29876	6.23576	2.11171	2.89105	2.56254	0.443972	1.08481	1.16791	high
TCGA-CV-6940-01A	0.404045	0.0184418	0.0618075	0.387921	0.199674	0.613765	0.752826	0.0116276	1.99049	0.450013	1.07845	0.680044	1.36932	0.441912	0.81958	0.584715	1.63691	2.09579	3.6374	1.50984	1.70331	0.0625193	0.644938	1.1711	high
TCGA-CV-A6JU-01A	0.40938	0.027808	0.0699282	0.0518181	0.0161081	0.780155	0.240154	0.0131855	3.66758	0.38752	0.392723	0.815762	1.70154	0.936128	2.14339	0.388208	2.3439	1.56109	0.449027	0.878606	0.772715	0.0239645	0.88701	1.17337	high
TCGA-F7-A624-01A	3.20603	0.0513693	0.569683	0.391075	0.604521	1.23092	0.0356066	0.135931	4.61221	2.2483	4.66922	2.08477	3.81087	5.75345	4.71719	4.71233	8.11846	7.93315	6.11215	6.6093	5.07191	2.89401	0.833086	1.18592	high
TCGA-CX-7086-01A	0.774643	0.0209488	0.185052	0.385434	0.235363	0.852591	0.16721	0.024675	2.68624	0.797046	1.33714	0.929052	0.996786	2.31137	1.46257	1.29359	5.61023	4.00019	2.06693	2.13431	1.67644	0.202959	0.990386	1.18619	high
TCGA-CR-7389-01A	0.545025	0.082485	0.197634	0.695248	0.304928	1.05798	0.268838	0.0159305	2.57802	0.713681	1.06008	1.20377	1.50248	0.988078	1.15867	0.834318	3.42605	2.57637	1.44859	2.40954	1.56571	0.0193517	1.59528	1.19718	high
TCGA-UF-A7JC-01A	0.224644	0.0187322	0.0317245	0.0100871	0.0215922	0.195376	0.294374	0.00886742	1.25735	0.124282	1.92647	0.346422	0.568107	1.25986	0.281163	0.405123	3.73099	2.60876	1.15439	1.03462	0.673273	0	0.52233	1.19846	high
TCGA-H7-8501-01A	2.92013	0.127944	0.595371	1.01735	0.646693	2.63421	0.0909473	0.121013	3.18632	2.15735	3.68469	3.08196	4.13117	6.84455	3.95214	4.67174	11.5242	9.0452	6.99654	6.25643	5.44603	2.42713	0.966139	1.19866	high
TCGA-HD-A6I0-01A	1.22773	0.0086891	0.0863263	0.175979	0.019973	0.780931	0.209347	0.0564429	2.85011	0.688235	1.82642	1.44388	1.59022	2.67597	2.55833	1.66028	5.99029	3.76163	3.75737	4.30186	2.77351	0.222026	1.39513	1.20484	high
TCGA-CN-6995-01A	1.75521	0.0624171	0.149791	0.404566	0.152255	1.91279	0.354415	0.0324599	3.1988	2.10095	2.49571	2.03297	2.73022	5.99768	3.30194	3.28561	6.88106	6.25232	5.40209	3.83614	4.08708	1.41915	0.614594	1.20707	high
TCGA-CR-7390-01A	0.229108	0.0586632	0.0485589	0.0795849	0.0971381	0.357379	0.139377	0.00512639	1.15474	0.321149	0.661269	0.425723	0.886234	0.196016	0.373014	0.299495	0.312816	0.385145	0.191005	0.9406	0.566272	0	1.644	1.21119	high
TCGA-T3-A92M-01A	1.23559	0.163056	0.183594	0.292596	0.415382	1.70506	0.128025	0.0663178	3.1023	1.52303	1.82762	2.04125	2.56791	4.80743	2.26816	2.67716	6.83182	5.31981	3.72059	3.29939	2.66394	0.946223	1.23831	1.2122	high
TCGA-CV-6948-01A	0.905724	0.149699	0.246116	0.828757	0.506421	0.617701	0.0836148	0.0487766	2.88421	1.15799	1.31678	1.01091	1.94822	2.06579	1.74068	1.52699	4.74036	5.57481	4.3706	3.50718	2.69664	0.626379	4.99549	1.21943	high
TCGA-CV-A464-01A	0.8089	0.0385441	0.340448	0.273053	0.235161	1.16658	0.165206	0.162496	2.77363	1.04219	1.15695	1.89619	1.56796	2.41379	1.17832	1.3485	7.23311	5.34385	3.28414	2.63925	1.91756	0.373146	1.75794	1.22335	high
TCGA-QK-A8ZB-01A	0.378447	0.0899728	0.135571	0.308456	0.0730992	0.698013	0.693462	0.0516218	2.03398	0.729294	0.574661	0.914221	1.63864	2.20529	0.69425	0.699276	3.69146	3.25066	1.43576	1.75326	0.913633	0.077765	1.32279	1.22706	high
TCGA-CV-5977-01A	0.334703	0.00653446	0.0221135	0.0278585	0.0150348	0.642769	0.0101227	0.00616618	1.644	0.300127	2.2726	0.825508	1.01491	3.82638	1.08908	0.311438	9.26325	5.82441	2.31658	2.33158	1.55115	0.42633	1.42373	1.23214	high
TCGA-UF-A7JV-01A	0.908256	0.0643421	0.136815	0.445342	0.123077	1.68165	0.336864	0.0236823	3.85314	0.887614	4.92239	2.36052	2.60805	1.56671	2.35491	1.80637	6.92878	3.68477	2.49574	2.91594	2.85147	0.508643	1.49329	1.23705	high
TCGA-CR-7379-01A	0.489561	0.0597377	0.103131	0.245743	0.0625983	0.816867	0.00857458	0.0207758	1.54905	0.503878	1.99468	0.821907	2.06401	1.44346	0.753192	0.825054	3.30446	3.39694	1.22274	1.73051	1.80706	0.0924149	1.70189	1.23726	high
TCGA-P3-A6T4-01A	0.456923	0.036168	0.0807738	0.16342	0.189793	0.402672	0.033688	0.0675087	1.54721	0.578042	1.62448	1.05277	0.870493	2.01049	0.370262	1.3116	3.2818	2.60257	0.817239	1.72616	0.944226	0.0249988	0.636347	1.23916	high
TCGA-UF-A71B-01A	0.738906	0.120928	0.145675	0.501583	0.119651	0.956457	0.438486	0.00847623	2.78141	0.660286	0.788015	1.38172	1.79549	1.30424	1.74694	1.2267	3.73486	2.301	2.13679	2.09927	2.13068	0.175043	1.80093	1.23987	high
TCGA-BB-4224-01A	0.345075	0.00676163	0.0894126	0.478665	0.105526	0.200309	0.133766	0.304419	1.66687	0.313298	0.793801	0.494492	1.73111	0.997599	1.25058	0.713355	4.16868	2.78404	1.20162	1.48588	0.536908	0.255885	0.622074	1.24142	high
TCGA-WA-A7GZ-01A	0.138569	0.077329	0.0808574	0.167095	0.0140329	0.388319	0.0678827	0.0398047	1.95767	0.192664	0.557027	0.587498	0.729699	2.25854	0.504292	0.298302	4.38365	1.8606	0.619528	0.38082	0.448319	0	1.36016	1.24282	high
TCGA-D6-A6EP-01A	0.626269	0.0727343	0.0416953	0.166262	0.0836043	0.317202	0.111301	0.027883	2.04892	0.146377	0.250963	0.708472	1.16144	0.332618	2.28291	1.01451	2.60607	1.2297	2.97958	2.13614	1.42062	0.0750561	3.24813	1.24784	high
TCGA-CR-7383-01A	1.29782	0.0513376	0.350805	0.474015	0.649337	1.63577	0.0294203	0.0953958	3.83303	1.37766	1.27931	1.94276	2.83132	1.69203	1.67217	2.07813	5.07924	4.934	4.34949	3.15578	2.53788	0.631066	1.73897	1.25121	high
TCGA-C9-A47Z-01A	0.538473	0.00683974	0.0534289	0.0577226	0.0313004	1.3769	0.255924	0.0756087	1.32164	0.656051	4.49604	1.32955	1.04499	2.12456	1.50192	0.966488	8.04617	5.36257	2.19801	2.06748	1.66462	0.443512	0.71182	1.25691	high
TCGA-CV-A45Q-01A	0.145677	0	0.0431732	0.0328169	0	0.317613	0.00399012	0	2.25984	0.401436	2.44789	0.314619	1.02383	1.00405	1.32157	0.573653	3.85262	2.98078	3.34987	2.60361	1.56075	0.0522519	0.65077	1.26101	high
TCGA-P3-A6T5-01A	0.703742	0.0399629	0.0515899	0.218743	0.175852	0.693318	0.035475	0.1552	2.36502	0.457218	1.76204	1.06707	1.55661	1.72292	0.828838	0.792017	3.25845	1.57691	2.39318	2.30648	1.56169	0.0775881	1.50111	1.26634	high
TCGA-CQ-6225-01A	0.0297954	0.0300416	0.0340249	0.468935	0.0116284	0.0317304	0.0639563	0.00476578	1.67471	0.201228	0.174869	0.124552	0.701521	0.100503	0.815778	0.280313	0.877947	0.361129	0.27956	0.481311	0.224391	0	0.610527	1.27245	high
TCGA-BA-4078-01A	0.660244	0.104555	0.249458	1.03301	0.326513	0.978368	0.164457	0.0712893	4.25541	0.868697	2.6189	1.35666	2.12475	1.92702	1.39393	1.47558	4.89024	4.55679	1.75683	1.16634	1.13412	0.267	1.67097	1.27333	high
TCGA-CQ-A4CH-01A	0.309107	0.0567997	0.132441	0.0273852	0.0724226	0.327261	0.0586939	0.0359878	2.08897	0.178966	1.95538	0.637796	1.51054	1.01928	0.732184	0.121039	1.6248	0.762506	0.298881	1.10669	2.11179	0.127182	2.0356	1.28236	high
TCGA-F7-A61S-01A	1.36563	0	0.258623	0.303423	0.289165	2.15566	0.123668	0.0259475	3.11585	1.38459	3.0796	2.21788	2.22494	3.8714	3.22335	2.45498	8.70828	4.50731	4.98516	4.75832	3.79928	1.04226	0.683857	1.28347	high
TCGA-CN-5373-01A	1.37222	0.0589642	0.38686	0.560539	0.594767	2.01038	0.218994	0.0881119	3.0134	1.31642	4.19549	1.94976	2.25974	3.12503	2.22312	1.3881	7.80531	5.95314	2.5682	3.27285	2.44141	0.667953	1.09581	1.2903	high
TCGA-CV-5970-01A	0.565749	0.053201	0.0925772	0.176282	0.132666	0.895424	0.0308013	0.0502479	1.93389	0.683699	1.52544	1.41104	1.63343	2.37314	0.82628	0.962531	5.13131	4.76893	1.8881	1.85976	1.7224	0.138264	1.07448	1.29751	high
TCGA-CV-7423-01A	0.0495549	0.0101317	0.0398057	0.169744	0.0116839	0.54956	0.209986	0.00956132	1.43923	0.149463	0.930815	0.708593	0.68688	0.630619	0.213561	0.314924	3.00868	1.76536	0.393976	0.703347	0.475767	0.0345835	0.934813	1.29841	high
TCGA-IQ-A6SG-01A	0.328955	0.0205509	0.040507	0.326744	0.179421	0.37369	0.307265	0.029	1.6446	0.500598	0.345858	0.773478	1.00585	0.413645	0.468686	0.624926	1.34175	1.09502	1.05423	1.66644	1.25267	0.0695497	1.77278	1.31181	high
TCGA-CN-4740-01A	0.911665	0.0791797	0.286826	0.414871	0.305646	1.21361	0.0182941	0.0472162	3.34588	1.22494	1.78398	1.21727	3.48174	3.8058	1.28503	2.41493	4.24244	5.09916	3.65645	2.51481	2.80091	0.662346	1.22435	1.31313	high
TCGA-CR-7371-01A	1.34082	0.116597	0.443792	0.625081	0.62161	1.64847	0.267538	0.0511636	3.37032	1.76307	1.5428	1.70605	1.84208	2.79042	1.71066	2.5456	4.61421	4.70958	3.03492	3.29951	2.88272	0.466732	1.88371	1.3138	high
TCGA-CV-7430-01A	0.210517	0.0282888	0.01076	0.564036	0.0109458	0.115977	0.25643	0.00448542	1.53901	0.246464	0.527355	0.273668	0.922119	0.430788	0.387271	0.496984	1.39815	0.909791	0.912495	1.02827	0.901724	0.0324151	0.802124	1.3142	high
TCGA-BB-A5HZ-01A	0.257597	0.00746435	0.0582232	0.0781982	0.0509006	0.521884	0.0717028	0.0140533	1.87663	0.241371	1.63564	0.745997	0.615182	0.782696	1.06768	0.397494	2.33641	0.971228	1.01566	1.1984	0.920426	0.0255355	1.21885	1.32002	high
TCGA-CV-6952-01A	0.80704	0.0633696	0.15651	0.122202	0.15349	1.35954	0.0194067	0.0696039	2.40601	0.800636	2.84086	1.80187	1.65675	3.47924	1.65356	1.71924	8.09958	5.84322	3.17601	3.02877	2.503	0.430615	0.61192	1.32343	high
TCGA-DQ-7592-01A	1.2306	0.0213221	0.191371	0.0763629	0.194475	1.35491	0.153662	0.0320685	2.22173	1.11257	0.977889	1.44972	1.91969	2.12618	2.08267	1.89977	7.27469	5.65358	2.68548	3.43831	2.94232	0.855869	0.956229	1.32786	high
TCGA-CV-5432-01A	0.729562	0.0377971	0.09456	0.137189	0.205571	0.506712	0.136849	0.0179546	1.83249	0.684903	0.368785	0.693227	1.30041	1.82142	0.940836	1.39559	2.93971	3.46648	2.15539	2.30572	1.39242	0.496944	1.24816	1.32887	high
TCGA-CV-6941-01A	0.683635	0.0279907	0.140399	0.319877	0.124882	1.21214	0.0740536	0.0368597	3.12195	0.944981	1.13998	1.44382	1.86348	1.90719	1.53492	1.15392	3.89051	4.36548	1.99836	2.08301	2.28026	0.130166	1.47054	1.33281	high
TCGA-CV-7254-01A	1.99735	0.119895	0.991751	0.820703	1.06623	1.71314	0.483313	0.106954	4.84197	1.90053	4.11578	1.9833	2.76997	2.93594	2.13719	2.44062	4.84471	5.46442	3.86113	2.97765	2.39029	1.78206	2.07081	1.3412	high
TCGA-DQ-5624-01A	0.452375	0.0425726	0.179474	0.266148	0.160261	1.85248	0.251511	0.0984778	2.19881	0.937626	2.1007	1.97529	1.80147	1.99854	0.87188	0.676099	3.32217	2.9552	0.967286	1.16733	1.08067	0.11434	1.74483	1.34449	high
TCGA-CV-7104-01A	1.18115	0.0421208	0.235856	0.393491	0.147221	1.92261	0.351301	0.0564903	2.90276	1.30017	3.16166	1.67876	2.5033	3.26767	2.42875	1.59303	6.08908	4.29	2.50708	2.23579	2.03154	0.336007	0.675837	1.34639	high
TCGA-QK-A6IG-01A	1.16447	0.00857484	0.0943863	0.173792	0.203293	1.1063	0.0523953	0.09423	2.96471	1.16042	3.20197	2.10873	2.25053	2.95046	2.75314	2.25378	7.28787	4.15263	4.8006	4.07358	3.39627	0.728317	1.29097	1.34653	high
TCGA-CN-5364-01A	0.362468	0.015498	0.0968185	0.503334	0.358918	0.484906	0.91958	0.00489218	3.19334	0.664367	1.61248	0.555762	2.25753	2.17718	0.894897	0.599394	4.26507	3.61598	4.66381	1.92305	1.7759	0.103478	0.742879	1.34936	high
TCGA-QK-A6IH-01A	0.401742	0.00706025	0.00800486	0.28211	0.0162408	0.320614	0.0852519	0.00666241	1.81408	0.294272	0.373432	0.542043	1.28912	0.565011	0.997249	0.733154	3.12039	1.36122	2.32957	1.99586	1.30409	0.161202	1.53795	1.35657	high
TCGA-CV-7440-01A	0.304635	0.0448965	0.063244	0.134324	0.0516804	0.667916	0.0175754	0	1.63995	0.44258	1.67714	0.755053	1.29295	2.78412	1.11834	0.708136	4.43365	3.07364	1.73767	2.2643	2.15447	0.149019	0.619031	1.36417	high
TCGA-CN-6011-01A	0.858789	0.0334228	0.0190484	0.323841	0.0759914	0.268252	0.0971732	0.0237311	2.35588	0.649594	3.53426	0.583343	1.58909	2.11186	2.68404	1.63346	6.02076	2.68364	3.29997	2.60921	2.87594	0.446867	0.803827	1.36421	high
TCGA-CV-7446-01A	0.536694	0.0220533	0.210678	0.846424	0.225083	1.09455	0.0227979	0.0464221	2.03759	1.41115	1.3914	1.24083	1.73567	1.90424	1.1371	1.89157	4.55061	4.32822	1.97304	2.41915	1.51634	0.56291	2.68933	1.36473	high
TCGA-CR-7399-01A	2.76511	0.0946835	0.68538	0.75125	1.07767	1.9205	0.165956	0.150188	3.72528	2.60426	4.09024	2.38306	3.78692	5.27514	3.47595	4.18437	6.57613	7.88808	4.25806	4.34905	3.9828	1.31616	0.773883	1.36973	high
TCGA-HD-A634-01A	0	0.130211	0.00906267	0	0.01838	0.0251928	0.0164826	0.00754328	0.814221	0.0960542	0.366504	0.164631	0.43198	0.440636	0.616951	0.269207	0.825865	0.0600645	0.1767	0.745834	0.442071	0	1.22941	1.37106	high
TCGA-CV-A6JM-01A	0.471282	0	0.0590712	0.239869	0	0.378994	0.29705	0.0213393	2.78637	0.498897	0.537405	1.24122	1.44542	0.618003	1.87109	0.504996	2.18509	1.97245	1.57302	2.235	1.17273	0.148917	1.26878	1.37278	high
TCGA-BA-A6DI-01A	0.369084	0.0262659	0.0704041	1.89931	0.0599064	0.540385	0.128413	0.01987	3.09274	0.450786	1.97837	0.921379	0.717213	4.13114	0.770482	1.11217	5.99183	6.14488	1.90314	1.71466	1.19473	0.310743	0.571004	1.37759	high
TCGA-BA-6871-01A	2.20095	0.108969	0.127689	0.34435	0.461096	1.00714	1.37391	0.0749145	3.53408	1.20468	1.65945	1.83831	1.96432	2.67878	2.20963	2.36753	4.94789	3.72752	4.79566	4.01969	4.10841	0.720907	2.90684	1.37945	high
TCGA-CN-6019-01A	0.974463	0.0561851	0.238986	0.370903	0.486394	1.35952	0.555495	0.0201305	4.40045	1.65197	1.56848	1.42692	3.39817	1.27702	1.15885	2.42499	3.51188	4.13613	2.67316	2.29548	2.10227	0.613306	1.87798	1.38108	high
TCGA-CN-6994-01A	0.530816	0.0143064	0.139764	0.470122	0.200986	0.76139	0.210575	0.00676684	2.93361	0.765327	1.1997	1.05941	1.80015	2.82901	0.988772	1.05719	2.56157	2.44709	2.56262	1.30213	1.77223	0.118716	0.908243	1.38475	high
TCGA-CN-A642-01A	1.71925	0.0269724	0.221417	0.337341	0.24499	0.780726	0.0313291	0.0566711	2.42283	1.51487	2.31964	1.60132	2.13614	4.91721	2.55919	2.95524	7.62738	6.5469	4.67467	4.15802	3.14244	1.43582	1.02867	1.38878	high
TCGA-F7-A50I-01A	0.726406	0.0277359	0.169609	1.49227	0.0632184	0.71914	0.0144065	0.0771665	2.55139	1.01753	2.94424	1.53306	1.64401	4.44564	1.2593	2.17991	7.48981	6.20101	2.37514	2.83852	2.3895	0.366886	1.23541	1.3896	high
TCGA-BB-8596-01A	0.949091	0.0489349	0.366878	0.306951	0.639058	0.898514	0.0604764	0.0732494	3.70104	1.18159	1.81325	1.6267	2.87342	1.55294	0.797809	1.15451	3.60228	3.37527	1.8821	1.87407	1.41521	0.0338692	1.85607	1.39615	high
TCGA-D6-A6ES-01A	0.495219	0	0	0.73042	0	0.519517	0.032921	0.00757624	1.50729	0.473003	0.20638	1.04234	0.886631	0.487301	0.418885	0.430498	0.728225	0.348539	0.504642	2.15894	0.601317	0	0.724227	1.399	high
TCGA-CV-7424-01A	1.44251	0.0845104	0.263488	0.840931	0.376645	0.603275	0.458682	0.0461781	3.44549	1.26489	2.70289	1.06413	1.93588	2.61474	1.80774	2.25662	4.65174	5.0259	4.19856	3.04848	2.77994	0.560419	3.56848	1.40301	high
TCGA-CR-7365-01A	0.283663	0.0331409	0.0689391	0.045555	0.10649	0.463515	0.192135	0.0179626	1.47924	0.354786	0.556774	0.472357	1.31995	1.98632	0.594671	0.756553	4.09867	4.53666	1.33675	1.34421	1.33745	0.0956781	0.941989	1.40443	high
TCGA-BA-5555-01A	0.988906	0.02995	0.104791	0.225187	0.265072	0.990244	0.0811237	0.0422072	3.41921	1.1647	0.841731	1.2359	1.88054	2.1192	1.54298	1.88386	4.50634	4.11106	3.48532	2.54631	2.69435	0.325094	0.99776	1.40481	high
TCGA-CQ-5334-01A	2.47675	0.0962873	0.423386	0.326639	0.596404	2.07184	0.116514	0.0973034	3.48378	1.88277	2.8142	2.13847	3.01833	5.19449	3.34655	3.71825	7.67244	7.00559	5.86762	4.71702	4.92985	1.55323	1.72722	1.405	high
TCGA-CX-7219-01A	1.08617	0.0703373	0.249608	0.437302	0.0756071	1.86188	0.224984	0.0224934	2.76295	1.55909	1.97848	2.03431	2.74611	3.87021	1.90206	2.32768	6.23813	5.82323	2.47955	3.26324	2.84808	0.200458	1.49845	1.40879	high
TCGA-CV-6945-01A	0.197186	0.025144	0.0284843	0.149899	0	0.209237	0.144623	0.00477844	1.31096	0.201728	0.407733	0.377452	0.808929	0.376734	0.727817	0.511974	1.53886	0.849401	0.481095	1.08984	0.568442	0.0682157	0.925944	1.40961	high
TCGA-CN-5356-01A	0.872484	0.0400273	0.332057	0.134007	0.32478	0.471468	0.162977	0.012709	1.69034	0.596595	0.783311	0.737873	1.27476	1.15699	0.470932	1.25181	1.65584	1.8081	2.11372	1.57912	2.00559	0.090266	1.80918	1.41973	high
TCGA-MT-A51X-01A	0.442141	0	0.0667057	0.0904656	0.0305435	0.53437	0.00689952	0.0188088	1.54197	0.54554	0.820961	0.793727	1.04468	0.91701	0.653045	1.04579	4.0023	3.71107	2.41921	2.0012	1.39304	0.19363	1.07224	1.42117	high
TCGA-CV-7095-01A	0.45812	0.0142376	0.0478799	0.213797	0.0645695	0.617813	0.228694	0.00673425	2.20012	0.516132	1.47067	0.762431	1.4789	1.84345	0.882579	0.811678	4.31601	4.69939	1.60723	1.42217	1.25005	0.140681	0.834193	1.42426	high
TCGA-CQ-6220-01A	0.703743	0.0262704	0.143011	0.174091	0.103275	0.837159	0.0102435	0.0431229	2.05381	0.892999	1.92041	1.01916	1.44182	3.78045	1.62591	1.66838	6.299	4.52692	2.96509	2.74261	2.10659	0.734855	0.813291	1.43898	high
TCGA-CV-5971-01A	1.1108	0.102324	0.555679	0.702913	1.20831	1.60111	0.0846855	0.0839186	3.38524	1.33487	1.8691	1.73664	2.14802	3.13559	1.83843	2.25634	6.76528	4.61066	3.5016	3.38976	2.53156	0.377441	1.816	1.44182	high
TCGA-4P-AA8J-01A	1.7162	0.0581875	0.310412	0.649097	0.361687	1.03789	0.0516894	0.0929783	3.69549	1.19351	1.56968	1.75372	2.26625	2.77002	2.37485	1.50166	5.00776	3.80934	3.59521	2.99798	2.18311	0.313695	1.89817	1.44282	high
TCGA-CV-6937-01A	0.767914	0.0178262	0.0597743	0.180782	0.138051	0.509695	0.210994	0	2.52895	0.32971	0.311633	0.755761	1.59193	0.533676	0.793703	0.586968	2.51628	1.26207	1.31438	0.798194	0.858075	0	1.22399	1.45253	high
TCGA-CQ-5329-01A	1.565	0.00845585	0.238798	0.302805	0.299372	2.03344	0	0.0472285	2.93087	0.952161	1.29042	2.01239	2.94117	3.64431	2.11202	2.40234	7.19989	7.48834	3.74488	3.7369	2.9008	0.806322	1.0674	1.45478	high
TCGA-CV-7090-01A	1.10043	0.0499494	0.213901	0.322623	0.338236	1.88541	0.0516192	0.0237797	3.64317	1.0068	1.83994	1.66388	2.99461	3.36893	2.86466	1.86275	6.81609	5.9927	3.24305	2.59096	2.94827	0.510419	2.06419	1.45487	high
TCGA-CR-6478-01A	2.04694	0.105576	0.577778	0.771989	1.02163	2.60843	0.0489941	0.249892	3.89503	1.89039	4.57564	2.58001	3.47415	5.80294	3.99743	3.42887	9.35876	7.12808	5.70576	5.25755	4.86126	1.85348	0.737625	1.45648	high
TCGA-CV-5436-01A	0.705039	0.0134192	0.110349	0.263853	0.0459279	1.06269	0.0713921	0.00634617	1.81561	0.699546	0.955694	0.985189	1.33598	1.715	1.58813	1.30555	5.01062	4.25582	2.6308	1.89046	2.06001	0.273939	1.17269	1.45833	high
TCGA-CQ-A4CD-01A	1.37577	0.044226	0.129811	0.316287	0.034139	1.33433	0.264456	0.0348866	3.15196	0.939527	1.90629	1.64819	2.54127	6.12969	2.50873	1.61321	8.95927	5.49419	2.81451	3.84006	2.4658	0.402172	0.997037	1.45853	high
TCGA-UF-A718-01A	1.21481	0.08239	0.257641	0.213958	0.396654	1.29112	0.429099	0.0879308	2.29323	1.00822	1.6152	1.4314	1.53617	2.52752	1.25191	1.86577	3.78328	3.66445	3.27405	2.81852	1.85825	0.404588	1.90771	1.46125	high
TCGA-CV-A6K2-01A	0.693438	0.0242791	0.174179	0.226609	0.126157	0.726538	0.247549	0.0454788	2.2259	0.886716	3.11283	1.06027	1.93065	2.83282	1.68702	1.35984	5.66391	4.27835	4.31214	2.88522	2.55508	0.369743	0.550168	1.46336	high
TCGA-BA-4076-01A	0.265088	0.0145976	0.0650706	0.271992	0.144837	0.934225	0.0225789	0.034199	0.810421	0.287499	1.03814	1.37798	0.737229	0.990773	0.525597	0.160068	2.53715	1.96724	1.14814	1.63944	0.74253	0	0.637107	1.46974	high
TCGA-IQ-A61H-01A	0.559062	0.0745453	0.156103	0.220486	0.134744	0.46288	0.12858	0.014365	2.30621	0.699758	4.28303	0.483936	1.66649	2.56632	0.776556	1.17269	4.97804	5.10269	2.42021	2.19445	1.40101	0.264007	2.82857	1.47238	high
TCGA-CV-6959-01A	0.943639	0.0800658	0.226906	0.137471	0.178478	1.20451	0.069965	0.036334	2.16637	0.892179	2.35534	1.78304	1.93382	3.50411	1.57836	1.55615	8.35499	6.90363	2.66102	3.11104	2.46404	0.355207	1.16534	1.47273	high
TCGA-D6-8568-01A	0.687093	0.102387	0.0746185	0.890903	0.20701	1.36698	0.072933	0.0359534	2.48346	0.582164	1.78374	1.65182	1.40244	2.00014	1.13264	1.10916	6.49669	4.53815	1.81095	2.68798	1.78453	0.351864	1.70484	1.47583	high
TCGA-CV-7433-01A	2.43121	0.109026	0.328242	0.604447	0.596407	2.46126	0.227945	0.0457263	4.14855	2.34714	2.20011	2.48987	3.74818	5.6154	4.09234	3.62453	9.10809	8.34946	4.15316	4.33117	4.73153	1.31059	1.37711	1.49826	high
TCGA-CQ-A4CI-01A	0.345916	0.0269314	0	0.289901	0.0155983	0.368755	0	0.0565857	2.71107	0.252567	2.58854	0.542535	0.963629	0.459992	0.919865	0.520874	1.28951	0.789171	1.23126	0.846325	2.19465	0.0685332	3.22156	1.50346	high
TCGA-CQ-6229-01A	1.01083	0.0275959	0.255171	0.24266	0.113305	0.988974	0.141662	0.0431611	2.40628	0.985027	2.29557	1.57831	1.95769	4.70624	1.72284	2.23462	9.21345	8.73788	3.10069	3.26572	2.34776	0.615285	0.788699	1.50655	high
TCGA-BA-6872-01A	0.781371	0.0313423	0.112306	0.0664882	0.188243	0.813321	0.036396	0.0148709	2.04494	0.418345	1.54154	1.18993	1.26912	1.63733	0.876733	0.861752	4.10349	3.88226	1.43276	1.66451	1.31614	0.0795726	1.42848	1.5096	high
TCGA-CN-6022-01A	1.01712	0.106316	0.170909	0.359859	0.156671	1.42826	0.556324	0.0206712	3.36166	1.27742	1.42759	1.85167	2.6883	0.872563	1.65343	0.670121	2.87571	3.12789	1.71266	1.19873	1.70154	0.0374905	1.52615	1.51087	high
TCGA-CN-6020-01A	0.601504	0.0544732	0.20204	0.83966	0.271659	0.997356	0.251088	0.0682011	2.36656	0.780858	1.68568	1.20306	2.21211	3.79214	1.31956	0.710512	6.11847	3.27047	2.91404	2.18825	2.43119	0.141473	1.66072	1.51126	high
TCGA-IQ-7630-01A	0.865802	0.0136336	0.0657989	0.373685	0.0415435	1.28091	0.104701	0.0340601	2.30961	0.86848	1.85594	1.51558	1.78618	1.6208	1.7307	1.33294	5.08106	2.46941	4.18621	2.62153	2.58781	0.297255	1.01058	1.51247	high
TCGA-CV-5966-01A	1.26833	0.0168853	0.140605	0.224716	0.0886719	1.67346	0.271364	0.0106441	3.68626	0.937937	3.5805	1.65533	3.03218	3.95342	3.7401	1.76545	8.79113	4.11606	4.28521	3.91525	3.10607	0.767645	1.60347	1.51363	high
TCGA-CN-5365-01A	1.26229	0.00520811	0.0805539	0.138767	0.0238817	0.769916	0.365075	0.0292387	2.7596	0.748165	2.40409	1.11973	2.23856	2.21589	2.16777	1.93073	6.35467	4.45014	3.12395	3.00321	2.38043	0.960657	0.863898	1.51635	high
TCGA-CN-5370-01A	1.52384	0.0639397	0.310164	0.559355	0.438881	2.2051	0.301858	0.0682688	3.87693	1.35719	4.01344	2.4082	3.3388	3.11312	3.76697	2.37572	8.39041	5.219	3.81104	3.46075	3.27325	0.771644	1.81093	1.52087	high
TCGA-CV-5434-01A	1.00319	0.12952	0.3274	0.286	0.500462	1.38875	0.466937	0.0491835	3.8773	1.49083	3.56635	1.68037	3.03288	1.83927	1.28692	1.24563	4.7622	5.1527	2.62565	1.52661	1.8047	0.13542	2.24074	1.52137	high
TCGA-CV-A6JO-01B	1.8924	0.0198594	0.150614	0.243127	0.146158	1.40886	0.228958	0.0555196	2.65826	1.55118	4.00645	1.84973	2.49555	4.22338	2.88803	3.00662	9.71617	6.62886	4.52458	4.34564	3.42284	1.31909	0.896191	1.53012	high
TCGA-CQ-6218-01A	0.69868	0.0305714	0.144381	0.205777	0.199457	1.47046	0.0650708	0.0145031	2.85216	0.780304	1.6128	1.31182	1.7622	2.47204	1.89075	1.40682	7.80002	4.23152	2.88331	2.51338	1.97869	0.273687	0.765575	1.53242	high
TCGA-CQ-5324-01A	1.21754	0.0380585	0.149445	0.164208	0.01769	0.858867	0.00398223	0.0144818	3.4256	1.17076	1.73556	0.641933	2.06019	4.36734	2.15778	1.99703	6.34599	5.95133	3.31494	3.51374	3.26682	0.66807	1.07588	1.53301	high
TCGA-CR-7382-01A	1.39307	0.173385	0.697116	0.762494	0.55881	2.67128	0.0199149	0.176324	4.41896	1.49483	4.21775	2.33185	3.36007	5.54425	3.05133	2.61951	8.83339	7.33301	3.35562	4.66771	3.53451	0.918995	2.62578	1.53372	high
TCGA-CV-A6JE-01A	2.29227	0.00736523	0.0493931	0.0771845	0.0336834	0.901625	0.0450998	0.0680401	3.24841	1.60074	2.00328	2.56555	1.97173	2.99446	3.74813	2.90728	6.28222	4.89153	5.56689	5.69742	3.62331	0.526562	1.7066	1.53805	high
TCGA-CN-A49A-01A	0.436702	0.0206991	0.0617154	0.195125	0	0.166302	0.110624	0.00654208	1.51565	0.183906	1.34421	0.180632	0.814977	0.871808	1.30676	0.390938	2.79188	2.16801	0.371505	0.883269	0.908253	0.0926547	1.69055	1.54195	high
TCGA-DQ-5630-01A	1.23437	0.0122476	0.323545	0.483582	0.317215	1.91479	0.318274	0.0624559	3.04727	1.39752	2.77836	2.36403	3.05014	6.33067	2.23872	2.22165	9.06046	7.86135	6.7361	4.63827	4.62685	1.09082	0.836429	1.55174	high
TCGA-CV-6933-01A	0.486966	0.0173304	0.114018	0.268285	0.029864	0.610547	0.100107	0.0204175	4.16851	0.762759	1.52816	0.809754	3.16283	0.608276	0.641191	0.629752	2.71335	2.17433	1.14042	1.0856	1.31311	0.0149275	0.963279	1.55418	high
TCGA-CQ-A4C6-01A	1.1705	0.00597353	0.254518	0.209053	0.205637	2.04644	0.0396818	0.165247	2.6387	1.15586	3.69075	2.45434	1.74841	4.48601	2.47359	1.47555	8.477	6.58562	3.4775	3.2695	2.69264	0.753267	1.29703	1.56214	high
TCGA-P3-A6T2-01A	0.468192	0.0299963	0.106014	0.142441	0.0548986	0.950507	0.00313078	0.0226992	1.7755	0.442203	2.12088	1.27071	1.29804	1.57407	0.968666	0.665974	5.84652	3.01772	1.55156	2.09895	1.3547	0.157977	1.45199	1.56279	high
TCGA-DQ-5631-01A	0.218371	0.0214517	0.060013	0.136443	0.0328712	0.57607	0.107621	0.0302672	1.3782	0.284842	1.10045	0.909947	1.1871	0.634284	0.421304	0.204993	1.78578	1.15968	0.483508	0.7759	0.791806	0	1.14875	1.57655	high
TCGA-F7-8298-01A	0.556644	0.0762305	0.106917	0.241312	0.0444685	0.718191	0.0100827	0.0454388	1.96039	0.452966	2.9451	1.46326	1.61513	0.582164	1.37368	0.995576	3.66726	1.98857	3.48278	4.21218	2.83571	0.275174	1.52239	1.57731	high
TCGA-P3-A6T8-01A	0.317114	0.103486	0.116822	0.240003	0.064556	0.717616	0.00737705	0.085167	1.5137	0.445478	1.10346	1.29926	0.833058	0.55751	0.392764	0.0802535	2.43336	0.750875	1.78305	1.52158	1.52126	0.0484237	2.23785	1.59034	high
TCGA-CR-7370-01A	1.19724	0.039684	0.125568	0.261096	0.132953	1.00417	0.00519117	0.0919148	2.94673	1.05818	4.52538	1.62076	1.89551	3.81646	1.56612	2.12255	4.82249	5.04406	2.70267	3.5045	2.80718	0.553889	2.34218	1.59168	high
TCGA-KU-A66T-01A	0.0339159	0.0114888	0.0194911	0.562145	0	0.0972195	0.122837	0	0.751469	0.0507109	0.892874	0.260225	0.411949	0.251187	0.253352	0.0965161	2.61282	0.118553	2.02677	0.725414	0.649733	0.0197189	0.814759	1.59524	high
TCGA-CV-5440-01A	0.265627	0.0153958	0.0685641	0.251058	0.119892	0.151275	0.130005	0.0072836	1.5696	0.284365	1.66368	0.226208	1.15697	3.54819	0.497915	0.494169	4.25502	3.74546	1.52956	1.27426	1.00856	0.151601	0.671919	1.59849	high
TCGA-CQ-7069-01A	0.5459	0.051878	0.0393963	0.046507	0	0.578556	0.0536111	0.0489971	1.91011	0.259947	1.61723	0.835518	1.2089	1.5158	0.782446	0.732787	4.45057	2.25479	0.486134	1.48297	1.69221	0	1.96766	1.60416	high
TCGA-CQ-A4CB-01A	0.644526	0.137026	0.225899	0.383946	0.464017	1.30849	0.110826	0.059776	2.79657	0.693587	1.93629	1.88359	2.17102	1.60871	1.16609	0.945196	4.74081	3.55357	1.69737	2.35489	1.49239	0.330272	1.29379	1.60699	high
TCGA-DQ-5625-01A	1.57758	0.0578562	0.182697	0.72338	0.036682	1.55874	0.0247576	0.0546495	3.13682	2.07156	4.23115	1.93273	2.8828	4.56476	3.74549	4.14884	10.0422	8.42526	6.62319	5.47887	4.49342	1.95652	0.525861	1.6097	high
TCGA-P3-A6T3-01A	0.236659	0.0143354	0.0243037	0.0753446	0	0.172031	0.00742939	0.0402136	0.642085	0.132564	1.19174	0.341	0.736334	0.652035	0.253166	0.258068	3.4924	3.20261	0.953617	0.918578	0.612366	0.0487624	0.949073	1.61126	high
TCGA-CN-6010-01A	1.25651	0.0836448	0.449515	0.482729	0.276453	0.469694	0.26252	0.0161598	2.93035	0.622619	3.22888	0.824831	1.56167	2.1959	1.15254	1.78355	2.54205	3.97275	2.68092	2.83062	2.422	0.113962	1.65301	1.6164	high
TCGA-F7-A622-01A	0.206252	0.00696985	0	0.156267	0.0475755	0.234591	0.0462111	0	1.53136	0.097623	0.495973	0.545729	0.68575	0.779129	0.55755	0.3236	6.26275	2.35419	1.25431	1.79114	0.86185	0.0931359	0.554008	1.61819	high
TCGA-CV-6934-01A	1.4811	0.104415	0.248376	0.87478	0.479434	1.14429	0.182886	0.0654324	3.27183	1.75794	1.82216	1.33948	2.86321	2.55469	2.34491	3.28672	5.21086	5.29457	4.37506	3.19056	3.38333	0.891698	1.58055	1.62801	high
TCGA-CV-7252-01A	0.562485	0.0113265	0.0692429	0.225599	0.0766486	0.775849	0.189778	0.0160041	2.37342	0.578935	1.80651	1.06435	1.90677	1.41528	0.882459	1.23575	5.4361	4.60377	3.46663	2.19278	2.33615	0.0946867	1.86152	1.62972	high
TCGA-QK-A64Z-01A	0.668075	0	0.0851608	0.28331	0.0670669	0.408044	0.229846	0.0277992	1.99419	0.559845	1.74548	0.873409	1.21306	2.41046	1.19899	1.25093	6.18239	4.86341	3.22291	2.10733	2.10758	0.360584	1.15548	1.63382	high
TCGA-CQ-6219-01A	1.7218	0.0608287	0.310075	0.660027	0.293794	1.39629	0.136429	0.102829	3.54861	2.10029	2.93608	1.63152	3.21564	4.47103	2.93546	3.16266	9.18624	7.44183	4.62137	4.30916	3.57164	1.32738	0.924867	1.63649	high
TCGA-BA-6873-01A	1.08855	0.0448218	0.137779	0.174733	0.25015	0.840264	0	0.0255449	1.96315	0.765087	2.56124	1.47767	1.57321	2.59633	1.36027	1.94383	7.87486	7.59944	3.70895	3.14395	2.97281	0.584679	0.85409	1.63658	high
TCGA-CR-7372-01A	0.40922	0.0411542	0.135478	0.140242	0.19294	0.992425	0.171332	0.0112103	1.6529	0.549765	0.736957	1.19648	1.18061	1.1208	0.709506	0.95223	2.8071	2.10718	1.47701	1.58017	1.21847	0.0798704	1.69453	1.63685	high
TCGA-CV-7422-01A	1.01803	0.0470244	0.288895	0.308425	0.195685	0.975566	0.0557486	0.026809	4.22961	1.1343	4.00712	0.82105	2.24255	1.75762	1.50181	1.69267	6.35218	3.83477	3.00149	2.2808	1.88647	0.296445	1.12874	1.63847	high
TCGA-WA-A7H4-01A	0.548528	0.104291	0.327768	0.644745	0.0808827	1.18118	0.0185195	0.140344	2.63973	0.872969	1.17522	1.98146	1.6377	0.715988	0.620252	0.556729	3.10979	2.21188	3.56334	1.65694	1.72322	0	2.0696	1.63925	high
TCGA-CQ-6227-01A	0.522465	0.035829	0.205757	0.165431	0.231534	0.563987	0.016319	0.0254458	2.09913	0.565945	1.37546	0.675191	1.52499	1.8668	0.704562	0.958248	4.20813	4.94049	1.68317	1.7776	1.32072	0.0611298	1.87027	1.64996	high
TCGA-CR-7401-01A	0.394702	0.0290494	0.133415	0.284984	0.190058	1.05893	0.0180916	0.032847	2.01606	0.639014	0.939311	1.18346	1.32573	1.50382	0.680587	0.876151	3.6306	3.5183	1.53999	2.35334	1.34946	0.0786313	1.54505	1.6735	high
TCGA-CQ-A4C7-01A	1.08134	0.0215809	0.148292	0.0904889	0.097015	0.895382	0.0801689	0.0203706	2.61017	0.525272	2.803	1.6026	1.70701	3.78351	1.51307	1.07528	7.30981	6.07335	3.05794	3.11162	2.52895	0.465166	2.17913	1.68793	high
TCGA-QK-A8ZA-01A	0.462923	0.0221416	0.0497443	0.604388	0.08336	0.527381	0.227227	0	1.53747	0.419151	3.96267	0.923924	0.862568	0.398542	0.836034	0.60734	2.89044	1.52881	1.79338	2.60915	1.37109	0.399935	1.00281	1.69101	high
TCGA-CV-7253-01A	0.132152	0.00818547	0.00928013	0.146546	0.0188196	0.100519	0.0418282	0	0.855994	0.116648	0.506958	0.168372	0.437602	0.121403	0.299011	0.060287	0.302525	0.252848	1.52676	0.599987	0.817717	0.0279856	0.352758	1.69477	high
TCGA-BA-A4II-01A	0.823436	0.132068	0.182199	0.536996	0.263217	1.71349	0.0891239	0.0844719	1.70833	0.795217	0.928975	1.75083	1.67529	2.32112	1.39078	1.27314	4.70766	4.05424	2.76145	2.80931	2.11223	0.587728	1.37504	1.69815	high
TCGA-CN-4742-01A	0.335455	0.0422178	0.104127	0.154935	0.156023	0.881366	0.106704	0.00448434	2.36253	0.87109	1.31531	0.850144	1.88698	0.435232	1.20968	0.813609	3.81094	2.69	2.14405	2.08924	1.62043	0.0483421	1.49554	1.70046	high
TCGA-CV-6935-01A	0.698195	0.019984	0.115103	0.542799	0.0230336	0.288199	0.239137	0	1.79889	0.402353	1.33533	0.506607	1.61905	0.745911	0.650164	0.716992	2.11505	2.51934	0.682689	1.27479	1.36792	0.100339	1.19546	1.70325	high
TCGA-CV-6951-01A	0.246074	0.0183293	0.0207708	0.0708558	0.0960545	0.52523	0.231528	0	1.75436	0.441419	1.12648	0.606565	0.816434	0.645654	0.57648	0.609928	1.24345	1.40604	1.11062	1.08896	0.787756	0.141046	0.721711	1.71104	high
TCGA-CN-5367-01A	0.510546	0.0156185	0.119576	0.382806	0.0239586	0.338657	0.0400339	0.0722429	2.90466	0.402939	0.47389	0.667608	2.13599	1.15204	1.66696	0.579172	4.52549	3.31554	1.01509	1.17037	0.846783	0.104259	0.696656	1.72067	high
TCGA-P3-A6T0-01A	0.156182	0.00488368	0.0220241	0.0866421	0.0334754	0.367672	0.0150961	0	0.606471	0.180213	1.35666	0.574901	0.712929	0.067583	0.360418	0.322385	0.592425	0.707574	2.40435	1.80276	1.50322	0.0658374	1.29297	1.72127	high
TCGA-RS-A6TO-01A	1.49729	0.0192301	0.11597	0.166676	0.207676	1.13872	0.0297183	0.036076	2.54466	1.34369	2.49471	1.72637	2.29418	5.53641	2.39817	2.25165	6.46925	5.8786	3.18383	4.11511	2.82452	1.1829	1.87355	1.72175	high
TCGA-CV-A6JD-01A	1.76865	0.0610058	0.115405	0.503252	0	1.58466	0.0160194	0.310857	3.741	1.22895	3.69705	1.97773	2.86953	4.38037	3.74775	2.78048	10.3173	7.20759	4.31915	3.2726	2.91449	1.15972	2.20123	1.73548	high
TCGA-CV-7434-01A	1.16896	0.0149737	0.0281749	0.158026	0.0229722	1.02214	0.328054	0.00472611	2.37512	0.64615	4.37382	0.967965	2.02112	2.63654	2.29651	1.70803	7.9739	4.60347	3.63432	3.0142	2.7071	0.46791	0.942232	1.74265	high
TCGA-BA-A8YP-01A	0.388347	0.12039	0.073066	0.288444	0.045038	0.858582	0.0862029	0.0369331	2.88747	0.53695	0.80959	1.28714	2.25444	1.34322	1.19431	0.332241	2.97139	2.56916	0.426243	1.17137	0.915923	0.0447952	4.67442	1.77332	high
TCGA-CV-7435-01A	0.785891	0.030656	0.165802	0.348098	0.157872	1.70917	0.057573	0.00971192	3.6032	1.11141	1.5305	1.63018	2.61846	1.39466	2.28683	1.27051	5.17989	4.1471	2.04941	2.19008	4.29392	0.151729	1.41973	1.7764	high
TCGA-CR-7386-01A	1.18796	0.080368	0.411733	0.414887	0.338453	1.9545	0.0762867	0.0510723	3.34246	1.83723	1.83903	1.92045	2.86766	3.86452	2.44214	2.35466	6.39635	6.21466	3.10649	2.76603	2.44557	0.941358	1.18583	1.77833	high
TCGA-IQ-7631-01A	0.058832	0.0417738	0.00685098	0.20002	0	0.00956681	0.0850942	0.00570166	2.68612	0.0329658	0.233441	0.0471244	0.389513	0.105075	0.127151	0.213881	0.474117	0.760125	0.959659	0.052994	0.289516	0	2.4711	1.78176	high
TCGA-CQ-5326-01A	0.561164	0.0805162	0.0327714	0.322093	0.0111968	0.658134	0.0712434	0.00458849	1.94547	0.665116	2.09086	0.838318	2.21748	3.2831	0.997088	0.972483	2.55172	3.20155	1.52032	2.46857	2.13459	0.287867	1.07769	1.7833	high
TCGA-CN-A63V-01A	0.547814	0.0353038	0.0399752	0.271995	0.170907	0.368047	0.106813	0	1.945	0.609037	1.4406	0.507277	1.36946	0.4128	0.568177	0.966932	1.41171	1.00604	1.89483	1.14228	1.76642	0.0719935	1.68354	1.78912	high
TCGA-P3-A6SX-01A	0.233302	0.0165572	0.0311393	0.0923443	0.0626662	0.0936858	0.0452025	0.0156271	0.913583	0.14528	0.394156	0.433014	0.365568	0.193417	0.343956	0.512159	0.950729	1.2849	0.783939	0.598853	0.606021	0	0.969351	1.79251	high
TCGA-CQ-5330-01A	1.92302	0.0408635	0.385473	0.252487	0.245657	2.27616	0.388414	0.134332	3.78493	1.44812	2.91217	2.39862	3.34816	4.71194	3.96934	2.52777	8.38941	7.97794	4.3902	4.03575	3.7893	0.963072	1.38649	1.79504	high
TCGA-UF-A7J9-01A	0.310685	0.0793436	0.138505	0.434277	0.0657043	0.878641	0.0619089	0.0801859	3.12231	0.957852	2.48969	1.49625	1.97416	1.87129	0.8329	0.640759	3.95281	2.95045	2.41101	2.73385	1.7594	0.289758	2.18677	1.79532	high
TCGA-CN-5366-01A	0.818472	0.0139335	0.12175	0.192085	0.181893	0.714594	0.283834	0.017507	2.55188	0.816885	2.23511	0.85803	2.07597	2.59981	1.87655	2.283	5.85801	6.47971	3.81075	3.11623	2.94618	0.858339	1.90747	1.80829	high
TCGA-BB-A5HU-01A	0.446589	0.0631082	0.0650247	0.0973889	0.141674	0.88296	0.226795	0.101477	1.26242	0.558666	1.13417	1.22813	1.59491	1.42103	0.586843	0.703533	3.48586	3.88238	0.466029	1.34147	1.17921	0.0398223	1.13291	1.81919	high
TCGA-HD-7753-01A	0.926343	0.0392889	0.111054	0.256199	0.375515	1.48752	0.049478	0.0124723	1.70485	0.853308	2.13139	1.7666	1.38933	1.72222	1.28153	1.35662	5.31644	4.08925	2.92941	2.52563	2.36369	0.185585	1.56586	1.82581	high
TCGA-QK-A8Z9-01B	0.827662	0.100763	0.291908	0.52623	0.276738	1.41503	0.133883	0.113574	3.05264	1.51558	1.44773	1.72609	2.30112	1.95042	1.33452	1.92982	5.09027	5.34766	2.60091	1.97744	1.78655	0.339862	2.06222	1.83195	high
TCGA-CN-6989-01A	0.812325	0.0888596	0.198755	0.452446	0.121628	1.94111	0.0917895	0.0383989	4.00331	2.04506	2.21443	2.68156	3.56773	0.899849	0.839031	0.679039	2.43447	1.63223	1.26329	1.37587	2.05438	0.0465681	2.05089	1.83595	high
TCGA-CN-4731-01A	0.503859	0.0121107	0.0340776	0.331096	0.0414948	0.163847	0.0280211	0.0114294	2.70233	0.294333	0.408126	0.232739	1.18459	2.07882	1.15071	0.640876	2.09631	1.58783	3.9643	1.62255	1.97425	0.020783	0.63601	1.84357	high
TCGA-CR-6493-01A	0.35523	0.0389558	0.0441031	0.0709119	0	0.690315	0.236211	0	1.38701	0.268509	2.17249	0.602297	0.863041	1.30336	0.918802	0.607227	6.40717	3.52218	1.21436	1.92608	1.29614	0.129905	0.674031	1.85228	high
TCGA-CV-5435-01A	0.277662	0.0266	0.0596469	0.0975218	0.0306485	0.170403	0.0677833	0	2.37444	0.245796	2.1012	0.243699	1.17726	0.178363	0.494175	0.385116	1.68082	2.14778	1.9066	1.10262	1.1974	0	1.66494	1.86485	high
TCGA-HD-7229-01A	0.902605	0.05846	0.098086	0.304906	0.106139	1.20859	0.248715	0.0333853	2.70283	1.09096	3.70372	1.6102	1.7233	4.12485	2.23943	2.41352	6.02217	4.60256	3.96212	4.30846	3.3967	0.868444	0.628955	1.87979	high
TCGA-CN-6024-01A	0.144007	0.0683445	0.0566051	0.0732591	0.0146086	0.283012	0.341166	0	1.54393	0.256169	2.50857	0.384377	0.95111	0.584022	0.340561	0.15968	1.91362	1.62863	0.168782	0.478374	0.409682	0.0431553	2.17962	1.8828	high
TCGA-CV-7102-01A	0.598223	0.0257248	0.145488	0.388559	0.190498	0.969589	0.0213129	0.024284	2.47645	0.622912	0.725725	1.05284	2.29124	1.21324	0.905994	0.828929	3.95869	5.00671	1.60502	1.65988	1.26611	0.230715	1.21181	1.89	high
TCGA-CV-6003-01A	0.257567	0.0108951	0.0487803	0.0854881	0.0125637	0.803272	0.0196554	0.00515012	1.82235	0.279712	1.62356	0.937019	0.956066	2.51047	0.929695	0.587775	5.65981	2.95338	1.24417	1.52655	1.28464	0.108743	0.635579	1.89649	high
TCGA-D6-6517-01A	0.837847	0.0447524	0.223973	0.286755	0.284651	1.60538	0.0348267	0.0380905	2.29965	0.92276	1.78409	1.59703	1.68822	0.875401	1.05106	0.69096	2.58469	2.04581	1.18321	1.57766	1.20045	0.0612706	1.1192	1.89815	high
TCGA-CV-7097-01A	1.14388	0.0420445	0.213268	0.478134	0.118096	2.06416	0.0327126	0.00502294	2.94281	1.06112	2.17879	1.64501	2.84091	2.12915	2.77028	1.20217	6.16938	3.41971	4.71194	2.83601	3.56616	0.205021	1.00743	1.89853	high
TCGA-BA-A6D8-01A	0.423043	0.11889	0.179152	0.635436	0.0600154	0.533487	0.0361557	0.00832785	3.25959	0.172119	0.406707	1.05661	1.38384	0.86432	1.17271	0.351741	0.837989	0.695724	2.34664	1.57006	1.52519	0.172146	4.89182	1.94191	high
TCGA-CV-7415-01A	2.14065	0.0236969	0.1686	0.316607	0.0959796	1.34991	0.143342	0.0134629	3.03635	1.49078	3.72517	1.68741	2.41611	4.9326	2.80523	2.35393	8.31302	7.88811	3.1398	4.07525	3.04457	0.790566	0.931758	1.9428	high
TCGA-T3-A92N-01A	1.18957	0.0161123	0.114759	0.247217	0.0550221	0.690842	0.0893236	0.015207	2.80728	0.673828	3.2091	1.37195	1.84288	5.52888	1.78017	1.57971	5.94263	5.75565	3.82729	3.26961	2.3759	0.728798	0.696839	1.94564	high
TCGA-BB-4227-01A	0.25283	0.0218322	0.0570717	0.565852	0.0168229	0.437784	0.0113288	0.00690203	1.26222	0.241158	1.02317	0.518297	1.0882	0.980946	0.339138	0.655096	0.83127	0.529415	1.49145	0.953408	0.88051	0.16669	0.640164	1.94973	high
TCGA-QK-AA3K-01A	1.32345	0.0802166	0.275907	0.196368	0.136136	1.22462	0.0929014	0.103233	3.58787	1.0411	1.18689	2.0191	2.31795	1.71328	2.23773	3.30232	5.52044	3.68803	3.20361	2.81389	2.54229	0.0693009	3.28588	1.95499	high
TCGA-BA-6868-01B	0.288531	0.0527044	0.0554525	0.35254	0.102451	0.368157	0.0563722	0.0143985	1.22639	0.199363	0.376727	0.440885	0.422034	0.691626	0.636231	0.558012	3.84978	1.79776	1.18359	0.926253	1.33935	0.0645318	0.933105	1.96146	high
TCGA-CV-7247-01A	0.110515	0.0380983	0.0378122	0.124051	0.0330273	0.172823	0.204373	0.00454599	1.49384	0.087016	0.779865	0.212603	0.662246	0.777328	0.314105	0.117573	1.73363	1.61728	1.09055	1.06585	0.734813	0.157238	0.915577	1.97162	high
TCGA-BB-A6UO-01A	0.361344	0.0568328	0.046212	0.127566	0.0189842	0.628501	0.0127874	0	1.95644	0.434743	2.9714	0.932222	1.69023	1.6166	1.32437	0.733173	4.99192	2.72144	3.61824	3.00496	2.24555	0.135929	1.7187	1.97561	high
TCGA-CV-7261-01A	0.559532	0.0730372	0.145368	0.243674	0.147763	0.471871	0.0791302	0.028001	2.65896	0.554139	1.85956	0.798662	1.69257	2.10157	0.79991	1.10862	4.03603	4.46119	1.29944	2.27113	1.54832	0.146994	2.45182	1.98595	high
TCGA-CV-5978-01A	0.808344	0.0823882	0.324008	0.395631	0.329031	1.46455	0.0988204	0.0176686	4.32118	1.0306	3.06549	1.84636	3.95115	1.01145	0.996023	0.894464	2.81355	1.89065	1.98941	1.96025	1.57924	0.0941527	1.46811	2.01684	high
TCGA-CQ-7072-01A	0.303062	0.0997062	0.0672786	0.391603	0.0277576	0.672522	0.0941845	0.0283669	2.49234	0.662119	0.758467	1.27713	1.66085	0.217061	0.909062	0.11445	0.948951	0.841786	1.10098	0.472748	3.39519	0	1.71644	2.02944	high
TCGA-CN-5363-01A	1.42757	0.0357073	0.140539	0.432742	0.172771	1.01219	0.0693351	0.0796278	2.78564	1.25725	3.36673	1.50779	2.43521	5.15951	2.45871	2.52007	8.48021	8.62709	4.62336	4.30276	3.7287	1.41878	1.24054	2.0438	high
TCGA-HD-7832-01A	0.919512	0.0703067	0.0288924	0.0910073	0.0351947	1.35974	0.168084	0.0617811	3.32409	0.802436	2.64475	1.39105	2.31017	5.06058	2.66441	1.593	8.10246	3.4451	2.30207	3.23033	2.45883	0.576472	0.581272	2.09919	high
TCGA-CV-7568-01A	0.447105	0.0214992	0.122402	0.170878	0.115235	0.932954	0.0244291	0.0363251	1.45107	1.02838	2.44468	1.08573	1.31004	1.96759	1.07887	1.42428	4.57509	5.15254	2.02509	1.61831	1.32223	0.233556	0.822528	2.11568	high
TCGA-CQ-6228-01A	0.458602	0.0495447	0.146641	0.323486	0.235575	0.295233	0.48647	0	2.63868	0.400409	0.721621	0.390623	1.6619	0.404305	0.443107	0.416402	1.96441	1.43021	0.512026	0.54283	1.33699	0.0172486	1.37111	2.1324	high
TCGA-CV-5976-01A	0.406473	0.0200067	0.0505152	0.0789209	0.0230597	0.690905	0.162371	0.0375241	1.94629	0.479361	1.18854	0.653601	1.50557	0.896735	0.900701	0.411752	5.08789	4.17072	2.41657	1.27576	1.38498	0.0510993	1.10977	2.13462	high
TCGA-CQ-6224-01A	0.57256	0.0260119	0.168394	0.45541	0.13483	1.61907	0.0856169	0.0326482	3.35846	1.04584	1.48928	1.37589	2.48777	2.85874	2.45329	0.922706	6.87617	4.29912	1.73038	1.21137	2.30706	0.248408	1.37299	2.14627	high
TCGA-CQ-A4CG-01A	0.484405	0.0466224	0.0266234	0.162241	0	0.528633	0.0242926	0.00557766	1.94823	0.218991	2.30423	0.440718	1.24009	1.21066	0.787979	0.29	6.31614	3.60903	3.03928	1.26484	1.83232	0.0599089	1.26762	2.14634	high
TCGA-CV-6962-01A	0.199876	0.00634406	0.063482	0.708495	0.014598	0.152872	0.0674306	0	1.70511	0.438242	0.797188	0.14352	0.76512	0.281349	0.387784	0.492415	1.31774	0.860791	1.05299	0.938651	1.25872	0.0217233	5.21725	2.15801	high
TCGA-CN-6023-01A	2.86074	0.128443	0.874294	0.811806	0.460509	1.23957	0.386886	0.131162	5.51099	1.84639	3.99336	1.46187	2.87925	3.4837	3.45577	4.22659	4.03	6.48385	3.18642	3.14527	4.19976	1.02982	2.10703	2.18046	high
TCGA-BA-5557-01A	1.07632	0.281228	0.191677	0.155525	0.374646	1.09809	0.0424976	0.0260006	3.522	0.807071	2.44609	1.36495	3.3241	1.84888	1.1454	1.85767	2.81946	3.62825	1.60121	2.43315	2.88853	0.494847	2.31325	2.19122	high
TCGA-QK-A6II-01A	0.676718	0.0123847	0.0210064	0.00666224	0.0284207	0.325202	0.158197	0.00585584	1.27894	0.348237	2.43292	0.849137	0.807961	2.5194	1.3768	0.606201	4.81784	2.09488	3.336	2.6384	1.40862	0.617511	0.633778	2.19331	high
TCGA-BA-A6DG-01A	0.862694	0.0800655	0.16924	0.26625	0.241642	0.950452	0.0577646	0.0295714	2.26528	0.843777	3.0206	1.52808	1.86084	0.706782	1.03844	1.63788	2.93875	2.3818	2.29625	1.28387	2.12053	0.164649	2.6616	2.20533	high
TCGA-CN-6998-01A	0.458045	0.008339	0.0603726	0.0828824	0.0286622	0.964301	0.12024	0.00394001	1.53148	0.735023	3.50368	0.973121	1.10443	3.12712	1.5581	1.07745	5.89087	4.14021	2.38244	2.70701	1.89319	0.388815	0.340373	2.20897	high
TCGA-CV-7103-01A	0.407841	0.0342448	0.164334	0.170279	0.172103	0.821316	0.0178066	0	2.39177	0.931379	0.957676	0.973611	1.57445	0.645949	0.293953	0.284236	1.89856	2.44984	0.536692	0.564888	0.788101	0.0666092	3.75903	2.24426	high
TCGA-CV-7429-01A	1.3046	0.0274405	0.0554754	0.397831	0.0378565	1.04644	0.21269	0	2.95149	1.13941	2.08334	1.14752	2.50638	0.859798	1.95888	2.19827	4.00192	2.19507	2.75017	2.40978	2.69834	0.32331	1.64312	2.25287	high
TCGA-CR-5247-01A	0.0661339	0.0270402	0.00771861	0.217255	0	0.144012	0.0553719	0	1.00472	0.108551	0.283625	0.270001	0.768784	0.0768811	0.332951	0.0915166	1.24246	0.398873	1.13615	0.388711	0.500605	0	1.58022	2.27506	high
TCGA-DQ-7588-01A	0.280663	0.00577378	0	0.0246365	0.0132892	0.0272547	0.0296053	0.00544829	0.348988	0.0962794	0.486582	0.0670711	0.122213	0.0367227	0.325496	0.294807	0.0802369	0.2952	0.440795	1.12416	0.119371	0.0962947	0.37675	2.27533	high
TCGA-H7-8502-01A	0.684057	0.0363108	0.0810879	0.0674926	0.0824542	0.683542	0.0650514	0.00864771	2.09213	0.515887	1.28916	0.87325	1.59924	1.91429	1.40729	0.795119	5.28659	3.9469	1.40257	1.88317	2.19689	0.233259	0.82464	2.29732	high
TCGA-CV-7416-01A	0.219753	0	0.0224466	0.218221	0.0114615	0.645578	0.0204789	0.00469724	2.2077	0.329952	1.35577	0.577446	2.16298	0.612462	0.701322	0.332537	4.12432	0.988275	1.6053	0.881462	2.20978	0	1.21693	2.31113	high
TCGA-CV-7418-01A	1.31924	0.0334235	0.191275	0.501052	0.250115	1.08884	0.275055	0.0522166	3.60941	1.36502	1.24098	2.08574	2.23357	3.25378	2.23867	2.26426	5.45011	4.70965	3.40354	3.52278	3.01742	0.645976	4.44315	2.31944	high
TCGA-CN-6016-01A	0.553806	0.0434613	0.103435	0.404575	0.215761	0.771007	0.0354094	0.0118457	3.22722	1.15907	1.43721	0.911814	2.40483	1.02408	0.874403	1.16358	4.71946	4.77414	5.27672	2.29131	2.76512	0.0427582	1.39266	2.32772	high
TCGA-BB-A5HY-01A	0.571988	0	0.0593507	0.279422	0.214396	1.06071	0.034118	0.0125463	1.69675	0.460463	1.12817	1.23003	0.819904	1.21118	1.17062	0.597123	3.93	1.28981	1.48637	2.19415	1.56593	0.290516	1.58914	2.33534	high
TCGA-CV-7177-01A	0.397565	0.0395878	0.0775396	0.441975	0.111364	0.247846	0.00517842	0	2.19943	0.315192	0.460736	0.539971	1.50973	0.524261	0.426035	0.527439	1.46501	1.39419	0.9605	1.31504	1.05783	0.0674814	1.44466	2.34116	high
TCGA-CV-5979-01A	0.311602	0.0431866	0.0488835	0.046321	0.0286189	0.639151	0.041491	0.00589698	1.57289	0.295268	0.484165	0.663422	1.11605	1.23313	1.05524	0.390167	5.73563	2.86742	2.4378	1.46174	1.73436	0.08376	0.429956	2.36167	high
TCGA-DQ-5629-01A	0.384023	0.0423083	0.0478913	0.146025	0.141451	0.249396	0.0110565	0.0134405	2.75349	0.431113	1.19915	0.477577	0.722992	0.900996	0.324005	0.425867	1.88978	1.12201	1.20335	1.60823	1.18925	0.0720716	0.67204	2.36238	high
TCGA-UF-A7JD-01A	0.349153	0.101189	0.058251	0.149549	0.070802	0.645596	0.0161676	0.0293696	1.91755	0.459564	1.33359	1.15152	1.54305	0.81289	0.961294	0.65083	2.89735	1.96421	0.749791	1.79136	1.32356	0.170005	2.09743	2.43302	high
TCGA-CV-6954-01A	0.692515	0.0183623	0.120572	0.118972	0.151659	1.37235	0.149612	0.0173313	2.56173	0.997399	1.29735	1.23207	2.11858	4.89613	2.12762	1.36815	7.54983	8.07979	1.61241	2.30441	1.66079	0.73243	0.882891	2.49356	high
TCGA-CQ-5332-01A	0.46596	0.106862	0.10399	0.346246	0.0713393	0.79184	0.0122367	0.00745605	1.63768	0.702704	0.973879	1.06834	1.65485	0.722145	0.56042	0.871903	2.27434	1.56877	1.12751	1.35989	0.825706	0.10517	2.13222	2.49747	high
TCGA-CV-7432-01A	0.216428	0.0317554	0.0120876	0.0396708	0.0244886	0.55621	0.00827624	0	1.31706	0.176607	1.45299	0.712152	0.998264	1.95097	0.466436	0.314924	5.60593	4.0485	1.31969	2.56193	1.49087	0.205678	0.471912	2.57061	high
TCGA-CV-7236-01A	0.530475	0.0102254	0.127994	0.242816	0.146253	0.740633	0.0158293	0.0429248	2.46334	0.514442	1.36482	0.910164	1.6724	1.83776	0.771928	1.0926	5.34345	4.84499	1.96435	1.96972	1.82467	0.258086	1.24656	2.57719	high
TCGA-UF-A71A-01A	0.203482	0.040736	0.105394	0.0579712	0.0314364	0.115342	0.462122	0.00648258	2.29949	0.0962629	2.03338	0.249514	1.48236	0.295226	0.491631	0.35091	1.53059	1.6203	1.17226	0.407331	0.512471	0.0466488	1.89222	2.62147	high
TCGA-CV-7438-01A	0.744762	0.0183138	0.0943922	0.173803	0.160819	1.33665	0.018933	0.0456426	2.69342	0.883035	2.37332	1.71847	2.01995	2.69741	1.81724	0.832876	7.10802	5.48451	2.20633	2.21551	1.83099	0.178792	1.05726	2.64723	high
TCGA-HD-7831-01A	0.281756	0.0141913	0.0555287	0.226296	0.255679	0.468769	0.196176	0.0133934	1.89115	0.389151	1.87329	0.709656	1.60032	0.530933	0.307257	0.39359	2.64422	2.81626	0.963801	0.877505	1.02183	0.0949927	2.23014	2.70132	high
TCGA-CN-4726-01A	0.162554	0.00665778	0.0880773	0.348418	0.0750123	0.705404	0.106384	0.0187662	1.08644	0.398804	1.35235	0.506731	1.20809	0.595963	0.204534	0.480201	2.53174	1.91366	1.36943	0.834698	0.881206	0.131642	0.921662	2.7477	high
TCGA-CR-6474-01A	0.564805	0.128484	0.208093	0.129301	0.147271	1.70123	0.146458	0.0118378	2.13905	1.11782	2.07235	1.48643	2.03878	1.65285	1.02459	1.19725	5.19285	5.95289	1.9864	3.14633	2.60895	0.176661	1.63381	2.75988	high
TCGA-P3-A5Q6-01A	0.383831	0	0.0354812	0.332618	0.152447	0.57262	0.00653513	0	2.0823	0.603948	0.820761	0.928377	1.40089	0.844802	0.501487	0.337351	2.34206	3.18423	0.518485	1.03125	0.864706	0.0639791	1.21359	2.81293	high
TCGA-UF-A71A-06A	0.0520971	0.0439018	0.0200824	0.128155	0	0.095687	0.371768	0.00838736	2.11838	0.0122226	1.66438	0.0688621	0.737716	0.131391	0.439474	0.41697	0.751064	0.757309	0.23131	0.174465	0.256145	0.0303694	1.32683	2.8465	high
TCGA-CQ-6221-01A	0.104313	0.053534	0.0184387	0.261713	0.109046	0.132098	0.0580325	0.00513676	2.11401	0.0979678	0.421758	0.11403	1.80055	1.96059	0.271995	0.389232	1.38817	1.50278	1.612	2.04764	1.83379	0.0370705	2.10332	2.86258	high
TCGA-MZ-A7D7-01A	0.106077	0.0391056	0.0872266	0.277892	0.0361342	0.512848	0.0874708	0	0.830483	0.155087	1.40242	0.56387	0.540322	0.4137	0.405138	0.445109	4.73489	2.51756	1.25809	1.82681	0.504145	0.0796389	0.200444	2.90034	high
TCGA-CN-6018-01A	1.18065	0.0438106	0.163365	0.185432	0.191946	1.73949	0.0452784	0.0237858	3.19455	1.10786	2.34163	1.64014	2.80254	5.18397	2.61895	2.05346	7.21707	4.95523	3.62063	3.45946	3.8922	0.382133	1.60562	2.92695	high
TCGA-BA-4074-01A	0.375686	0.019105	0.0482613	0.284852	0.0110528	0.816206	0.0914974	0.0225058	1.97354	0.10836	1.06248	0.770012	1.77124	0.723639	0.286272	0.416345	5.49873	1.51676	1.64421	1.36438	0.811876	0.0488198	1.01091	2.94194	high
TCGA-IQ-A61O-01A	0.581635	0.0580256	0.109867	0.228801	0.0797347	0.566997	0.0890304	0.0166627	2.73264	0.576841	1.83334	0.777618	2.22582	0.470112	0.623463	0.729624	2.80724	2.46843	1.31158	0.596667	0.810474	0.07931	1.61119	2.95742	high
TCGA-BB-8601-01A	0.144655	0.0284843	0.0741887	0.109034	0.064903	0.185203	0.109746	0	1.83411	0.120266	1.0175	0.161325	0.286634	0.072144	0.359192	0.262309	0.13066	0.153007	1.16797	1.1663	0.247283	0	1.15079	2.97796	high
TCGA-P3-A5QA-01A	0.260813	0.0588383	0.0469073	0.311924	0	0.599045	0.0246279	0.0224889	1.34629	0.321123	4.48987	1.08386	0.654016	0.981217	0.698257	0.611955	4.6144	2.84506	2.93688	1.94765	3.97006	0.0804126	2.01531	3.04959	high
TCGA-BA-7269-01A	0.573892	0	0.0270678	0.215831	0.0678706	0.323637	0.113725	0	2.64896	0.525762	0.347901	0.815269	1.32465	0.856419	0.754756	0.735284	2.90204	1.5411	2.41337	1.69288	1.51859	0.13829	1.26618	3.07059	high
TCGA-CV-6960-01A	0.365973	0.0858285	0.0248589	0.141224	0	0.313744	0.403658	0.0103923	1.49944	0.182058	0.484246	0.555607	0.815666	0.148442	0.256392	0.122219	0.218986	0.0580235	0.0757447	0.495537	0.591814	0	0.650931	3.09484	high
TCGA-CN-6997-01A	0.36867	0.0592746	0.148906	0.262362	0.105741	0.312906	0.028761	0.0441744	2.97676	0.811312	0.514093	0.559757	1.78531	1.36269	0.475597	0.549121	1.75787	2.7962	2.27379	1.22366	1.27071	0.029455	1.08612	3.10386	high
TCGA-CV-7437-01A	0.318675	0.0237756	0.0599134	0.421155	0.106603	0.329789	0.0577031	0.0224431	2.95516	0.29722	0.982014	0.336761	1.31242	2.60019	0.8046	0.293109	2.27387	1.98637	1.82084	1.19146	0.96243	0.118764	0.836596	3.20844	high
TCGA-CN-5361-01A	0.738016	0.0388607	0.100644	0.486096	0.116372	0.547612	0.41329	0.0245657	2.8661	0.718337	1.62979	1.0122	1.7666	2.06651	0.822065	0.750644	5.85141	4.99848	4.44964	2.71317	2.59028	0.322663	1.36336	3.23068	high
TCGA-CV-6950-01A	0.723041	0.0379729	0.0970329	0.103608	0.111044	0.596056	0.33885	0.0499506	2.36266	0.666764	3.29931	0.806563	1.57029	1.69416	0.939969	1.37691	5.0707	6.21285	2.36188	2.19108	1.84419	0.391949	1.04851	3.33932	high
TCGA-BA-4075-01A	0.14853	0.0142702	0.117104	0.704642	0.0164529	0.403858	0.0723029	0	1.06888	0.104702	2.54464	0.328361	1.9403	0.393026	0.24382	0.193291	3.19405	0.314277	1.11474	0.514322	0.990522	0	0.402142	6.47054	high
